# Supplementary material for: Effects of SARS-CoV-2 Spike S1 Subunit on the Interplay between HBV- and HCC-Related Molecular Processes in Human Liver: Biological Significance and Management in COVID-19 Patients
Source: Preprints.org preprint supplement (doi:10.20944/preprints202411.0138.v1), 2024-11-04
Supplement: Supplementary file 1 [file supplementary]

## Sheet: BIOL PRO
#term ID	term description	observed gene count	background gene count	strength	signal	false discovery rate	matching proteins in your network (labels)
GO:0000079	Regulation of cyclin-dependent protein serine/threonine kinase activity	28	111	0.87	1.99	5.36e-13	CCND1,CDKN1B,CCNB1,SPDYE1,PKMYT1,EGFR,CCNB2,PLK1,CDC25A,CKS1B,CDC25C,SPDYE3,SPDYA,SFN,GADD45A,PTEN,SRC,CKS2,CCNB3,CDKN2A,SPDYE2,SPDYE2B,AKT1,CCNA2,SPDYE6,SPDYE5,SPDYE16,ACTB
GO:0000086	G2/M transition of mitotic cell cycle	15	58	0.88	1.31	3.08e-07	AURKA,CDC25B,CCNB1,PKMYT1,CDK2,SKP2,CALM3,PLK1,BIRC5,CDC25A,CDC25C,CDK1,CCNA2,CALM1,CALM2
GO:0000165	MAPK cascade	63	219	0.92	3.39	4.65e-32	MAPK13,MAPK12,MAPK1,RIPK2,NFKB1,MAPK14,ARHGEF6,KRAS,RIPK1,ITGAV,MAP2K2,MAPK3,KDR,ATF2,RAPGEF2,DAXX,EGFR,FLCN,ARAF,LRRK2,MAP2K1,PRKCE,PTPN7,SMAD3,MAPK11,FGFR3,MAP2K3,DUSP9,CRKL,MAP3K5,AGT,DUSP10,MAPKAPK2,MAP3K7,NRAS,IRAK1,CARD9,NOX1,TLR4,AR,CDK1,MAPK8,PTK2B,MAP2K7,MAP3K1,NLK,RASGRP3,PTPN6,FGFR1,MAPK9,MAPKAPK3,RAF1,BRAP,HRAS,MAP2K4,DUSP7,BRAF,IKBKB,MAPKAPK5,MAP2K6,IRAK4,MAP3K14,MYD88
GO:0000165	MAPK cascade	67	219	0.87	3.15	6.45e-31	9606.ENSP00000012443,9606.ENSP00000211287,9606.ENSP00000215659,9606.ENSP00000215832,9606.ENSP00000216225,9606.ENSP00000220751,9606.ENSP00000221930,9606.ENSP00000226574,9606.ENSP00000229795,9606.ENSP00000256078,9606.ENSP00000259808,9606.ENSP00000261023,9606.ENSP00000262948,9606.ENSP00000263025,9606.ENSP00000263056,9606.ENSP00000263923,9606.ENSP00000264110,9606.ENSP00000266000,9606.ENSP00000275493,…	PPP5C,MAPK13,MAPK12,MAPK1,RBX1,RIPK2,TGFB1,NFKB1,MAPK14,KRAS,RIPK1,ITGAV,MAP2K2,MAPK3,MAP3K8,KDR,ATF2,DAXX,EGFR,ARAF,MAP2K1,PRKCE,PTPN7,MOS,SMAD3,MAPK11,MAP2K3,DUSP9,CRKL,ERCC6,MAP3K5,AGT,DUSP10,MAPKAPK2,MAP3K7,NRAS,IRAK1,CARD9,TLR4,AR,AVP,ADRA1A,GPS1,MAPK8,YWHAZ,PTK2B,MAP2K7,MAP3K1,NLK,PTPN6,FGFR1,MAPK9,MAPKAPK3,TNF,RAF1,HRAS,MAP2K4,DUSP7,BRAF,IKBKB,MAPKAPK5,MAP2K6,IRAK4,ADRA2B,MAP3K14,CTNNB1,MY…
GO:0000212	Meiotic spindle organization	5	16	0.96	0.56	0.0051	AURKA,NDC80,CCNB2,PPP2R1A,ASPM
GO:0000338	Protein deneddylation	7	11	1.19	1.06	4.09e-05	9606.ENSP00000268717,9606.ENSP00000299259,9606.ENSP00000304102,9606.ENSP00000346340,9606.ENSP00000350512,9606.ENSP00000376167,9606.ENSP00000424655	COPS3,COPS2,COPS6,COPS8,COPS5,GPS1,COPS4
GO:0001101	Response to acid chemical	33	131	0.87	2.19	2.87e-15	RPS6KB1,CDKN1B,SESN2,LAMTOR5,PDGFRA,CYBA,RRAGB,PIK3CA,ATF2,EGFR,LAMTOR1,CAPN2,RPTOR,LAMTOR4,FYN,ATP2B4,MTOR,LAMTOR2,RRAGD,RRAGC,BCL2L1,CYBB,RRAGA,PDX1,BAD,SLC38A9,CASTOR1,RHOA,LAMTOR3,LYN,NTRK1,IGF1R,MYD88
GO:0001101	Response to acid chemical	31	131	0.76	1.71	8.00e-12	9606.ENSP00000225577,9606.ENSP00000228872,9606.ENSP00000257290,9606.ENSP00000261623,9606.ENSP00000262850,9606.ENSP00000263967,9606.ENSP00000264110,9606.ENSP00000275493,9606.ENSP00000299178,9606.ENSP00000307272,9606.ENSP00000343118,9606.ENSP00000346671,9606.ENSP00000350310,9606.ENSP00000354558,9606.ENSP00000358423,9606.ENSP00000360608,9606.ENSP00000362092,9606.ENSP00000364731,9606.ENSP00000365230,…	RPS6KB1,CDKN1B,PDGFRA,CYBA,RRAGB,PIK3CA,ATF2,EGFR,AVPR1A,RPTOR,LAMTOR4,FYN,ATP2B4,MTOR,RRAGD,GRIN1,RRAGC,F7,BCL2L1,RRAGA,PDX1,TH,BAD,BCL2,TNF,RHOA,LAMTOR3,LYN,NTRK1,IGF1R,MYD88
GO:0001508	Action potential	22	99	0.81	1.53	2.14e-09	KCNQ1,YWHAH,KCNMB4,KCNN2,CACNA1C,GJA1,CACNA1D,GJD2,KCNJ3,KCNMB3,SCN4B,SCN5A,MTOR,RYR2,KCNE1,NEDD4L,SLC8A1,SCN1B,KCNMB2,KCNJ5,KCNE1B,SCN7A
GO:0001508	Action potential	23	99	0.75	1.39	9.79e-09	9606.ENSP00000078429,9606.ENSP00000155840,9606.ENSP00000258111,9606.ENSP00000264773,9606.ENSP00000266376,9606.ENSP00000286548,9606.ENSP00000288139,9606.ENSP00000295101,9606.ENSP00000319370,9606.ENSP00000322460,9606.ENSP00000328968,9606.ENSP00000334198,9606.ENSP00000352011,9606.ENSP00000354558,9606.ENSP00000355533,9606.ENSP00000382226,9606.ENSP00000384763,9606.ENSP00000385019,9606.ENSP00000396915,…	GNA11,KCNQ1,KCNMB4,KCNN2,CACNA1C,GNAQ,CACNA1D,KCNJ3,KCNMB3,SCN4B,SCN5A,CACNA1H,CACNA1G,MTOR,RYR2,KCNE1,SLC8A1,CACNA1I,SCN1B,KCNMB2,KCNJ5,KCNE1B,SCN7A
GO:0001542	Ovulation from ovarian follicle	4	10	1.07	0.52	0.0084	NOS3,PGR,NRIP1,FOXO3
GO:0001542	Ovulation from ovarian follicle	4	10	0.99	0.48	0.0122	9606.ENSP00000297494,9606.ENSP00000325120,9606.ENSP00000327213,9606.ENSP00000339527	NOS3,PGR,NRIP1,FOXO3
GO:0001774	Microglial cell activation	11	31	1.01	1.28	1.66e-06	TLR2,MAPT,TLR9,IFNGR1,JUN,AGER,JAK2,ITGB2,TLR6,TRPV1,ITGAM
GO:0001774	Microglial cell activation	13	31	1.01	1.45	1.74e-07	9606.ENSP00000260010,9606.ENSP00000284981,9606.ENSP00000353874,9606.ENSP00000356713,9606.ENSP00000360266,9606.ENSP00000363773,9606.ENSP00000371067,9606.ENSP00000380948,9606.ENSP00000389600,9606.ENSP00000398698,9606.ENSP00000459962,9606.ENSP00000496959,9606.ENSP00000500990	TLR2,APP,TLR9,IFNGR1,JUN,C1QA,JAK2,ITGB2,TLR6,TNF,TRPV1,ITGAM,SNCA
GO:0001782	B cell homeostasis	7	30	0.75	0.55	0.0043	9606.ENSP00000293288,9606.ENSP00000361965,9606.ENSP00000363591,9606.ENSP00000376943,9606.ENSP00000381185,9606.ENSP00000428924,9606.ENSP00000437955	BAX,ADA,BAK1,BCL2L11,BCL2,LYN,HIF1A
GO:0001783	B cell apoptotic process	5	11	1.12	0.7	0.0015	BAX,CRKL,ADA,FNIP1,BCL10
GO:0001783	B cell apoptotic process	6	11	1.12	0.84	0.00035	9606.ENSP00000293288,9606.ENSP00000346300,9606.ENSP00000361965,9606.ENSP00000363591,9606.ENSP00000381185,9606.ENSP00000498104	BAX,CRKL,ADA,BAK1,BCL2,BCL10
GO:0001816	Cytokine production	5	18	0.83	0.46	0.0122	9606.ENSP00000261023,9606.ENSP00000283249,9606.ENSP00000357470,9606.ENSP00000398698,9606.ENSP00000437955	ITGAV,ITGB6,IL6R,TNF,HIF1A
GO:0001836	Release of cytochrome c from mitochondria	6	21	0.92	0.63	0.0023	TP53,BAX,BID,SFN,BCL2L1,BAD
GO:0001836	Release of cytochrome c from mitochondria	8	21	0.96	0.89	0.00014	9606.ENSP00000269305,9606.ENSP00000293288,9606.ENSP00000318822,9606.ENSP00000340989,9606.ENSP00000363591,9606.ENSP00000365230,9606.ENSP00000378040,9606.ENSP00000381185	TP53,BAX,BID,SFN,BAK1,BCL2L1,BAD,BCL2
GO:0001867	Complement activation, lectin pathway	4	10	0.99	0.48	0.0122	9606.ENSP00000291744,9606.ENSP00000296280,9606.ENSP00000363079,9606.ENSP00000383690	FCN2,MASP1,MBL2,MASP2
GO:0001936	Regulation of endothelial cell proliferation	33	138	0.76	1.79	1.14e-12	9606.ENSP00000172229,9606.ENSP00000231228,9606.ENSP00000244007,9606.ENSP00000252486,9606.ENSP00000260356,9606.ENSP00000261623,9606.ENSP00000263923,9606.ENSP00000264657,9606.ENSP00000282397,9606.ENSP00000287820,9606.ENSP00000303231,9606.ENSP00000307272,9606.ENSP00000311127,9606.ENSP00000329357,9606.ENSP00000339730,9606.ENSP00000344220,9606.ENSP00000354394,9606.ENSP00000358548,9606.ENSP00000360266,…	NGFR,IL12B,PLCG1,APOE,THBS1,CYBA,KDR,STAT3,FLT1,PPARG,IL12A,RPTOR,VEGFB,SP1,THBS4,PDPK1,STAT1,NRAS,JUN,PIK3CD,ITGA4,PRKD1,FGFR1,PRKD2,TNF,AGTR1,PRKCA,HIF1A,NR4A1,PGF,AKT1,ITGB3,AKT3
GO:0001938	Positive regulation of endothelial cell proliferation	24	96	0.78	1.53	1.23e-09	9606.ENSP00000244007,9606.ENSP00000261623,9606.ENSP00000263923,9606.ENSP00000264657,9606.ENSP00000307272,9606.ENSP00000311127,9606.ENSP00000329357,9606.ENSP00000339730,9606.ENSP00000344220,9606.ENSP00000358548,9606.ENSP00000360266,9606.ENSP00000366563,9606.ENSP00000380227,9606.ENSP00000390535,9606.ENSP00000393312,9606.ENSP00000393978,9606.ENSP00000398832,9606.ENSP00000408695,9606.ENSP00000437955,…	PLCG1,CYBA,KDR,STAT3,RPTOR,VEGFB,SP1,THBS4,PDPK1,NRAS,JUN,PIK3CD,ITGA4,PRKD1,FGFR1,PRKD2,AGTR1,PRKCA,HIF1A,NR4A1,PGF,AKT1,ITGB3,AKT3
GO:0001961	Positive regulation of cytokine-mediated signaling pathway	11	57	0.75	0.8	0.00019	RIPK2,TRAF2,RIPK1,TXK,MED1,TBK1,IRF7,IL1R1,MAVS,TICAM2,IRF3
GO:0001961	Positive regulation of cytokine-mediated signaling pathway	14	57	0.77	1.02	9.05e-06	9606.ENSP00000220751,9606.ENSP00000247668,9606.ENSP00000259808,9606.ENSP00000264316,9606.ENSP00000300651,9606.ENSP00000329967,9606.ENSP00000355865,9606.ENSP00000380697,9606.ENSP00000386380,9606.ENSP00000386884,9606.ENSP00000401980,9606.ENSP00000415139,9606.ENSP00000437955,9606.ENSP00000464030	RIPK2,TRAF2,RIPK1,TXK,MED1,TBK1,PRKN,IRF7,IL1R1,CXCR4,MAVS,TICAM2,HIF1A,IKBKE
GO:0001975	Response to amphetamine	10	32	0.88	0.94	5.21e-05	9606.ENSP00000254079,9606.ENSP00000291295,9606.ENSP00000315011,9606.ENSP00000332549,9606.ENSP00000370571,9606.ENSP00000378323,9606.ENSP00000440864,9606.ENSP00000496339,9606.ENSP00000499717,9606.ENSP00000499797	PPP1R1B,CALM3,EDNRA,GRIN2A,TH,PPP3CA,NR4A1,SLC18A2,CALM1,CALM2
GO:0001976	Nervous system process involved in regulation of systemic arterial blood pressure	4	14	0.92	0.42	0.0200	TNNI3,AGT,ACE2,RPS6KA2
GO:0001976	Nervous system process involved in regulation of systemic arterial blood pressure	5	14	0.94	0.55	0.0054	9606.ENSP00000355627,9606.ENSP00000360973,9606.ENSP00000369960,9606.ENSP00000389326,9606.ENSP00000422435	AGT,AGTR2,ADRA1A,ACE2,RPS6KA2
GO:0001990	Regulation of systemic arterial blood pressure by hormone	7	36	0.75	0.54	0.0048	CYBA,NOS3,AGT,NOX1,ACE2,RHOA,RPS6KA2
GO:0001990	Regulation of systemic arterial blood pressure by hormone	12	36	0.91	1.15	4.00e-06	9606.ENSP00000261623,9606.ENSP00000297494,9606.ENSP00000299178,9606.ENSP00000355627,9606.ENSP00000356094,9606.ENSP00000360973,9606.ENSP00000366416,9606.ENSP00000389326,9606.ENSP00000398832,9606.ENSP00000400175,9606.ENSP00000422435,9606.ENSP00000496396	CYBA,NOS3,AVPR1A,AGT,AVPR1B,AGTR2,EDNRB,ACE2,AGTR1,RHOA,RPS6KA2,AVPR2
GO:0001992	Regulation of systemic arterial blood pressure by vasopressin	3	5	1.16	0.44	0.0192	9606.ENSP00000299178,9606.ENSP00000356094,9606.ENSP00000496396	AVPR1A,AVPR1B,AVPR2
GO:0001996	Positive regulation of heart rate by epinephrine-norepinephrine	3	6	1.08	0.4	0.0263	9606.ENSP00000306662,9606.ENSP00000368766,9606.ENSP00000369960	ADRA1B,ADRA1D,ADRA1A
GO:0002016	Regulation of blood volume by renin-angiotensin	4	9	1.11	0.56	0.0064	CYBA,AGT,ACE2,RPS6KA2
GO:0002016	Regulation of blood volume by renin-angiotensin	6	9	1.21	0.94	0.00016	9606.ENSP00000261623,9606.ENSP00000355627,9606.ENSP00000360973,9606.ENSP00000389326,9606.ENSP00000398832,9606.ENSP00000422435	CYBA,AGT,AGTR2,ACE2,AGTR1,RPS6KA2
GO:0002026	Regulation of the force of heart contraction	8	26	0.95	0.87	0.00017	SLC9A1,NOS3,PLN,ATP2B4,RYR2,SLC8A1,CAMK2D,NOS1
GO:0002026	Regulation of the force of heart contraction	9	26	0.92	0.93	7.73e-05	9606.ENSP00000263980,9606.ENSP00000297494,9606.ENSP00000350132,9606.ENSP00000350310,9606.ENSP00000355533,9606.ENSP00000369960,9606.ENSP00000384763,9606.ENSP00000425824,9606.ENSP00000477999	SLC9A1,NOS3,PLN,ATP2B4,RYR2,ADRA1A,SLC8A1,CAMK2D,NOS1
GO:0002027	Regulation of heart rate	23	104	0.81	1.56	9.22e-10	KCNQ1,MDM2,CACNA1C,CACNA1D,CALM3,KCNJ3,PRKACA,SCN4B,SCN5A,PLN,RYR2,AGT,ADA,KCNE1,SLC8A1,CTNNA3,SCN1B,CAMK2D,KCNJ5,TRPV1,KCNE1B,CALM1,CALM2
GO:0002027	Regulation of heart rate	31	104	0.86	2.09	4.98e-14	9606.ENSP00000155840,9606.ENSP00000258149,9606.ENSP00000266376,9606.ENSP00000288139,9606.ENSP00000291295,9606.ENSP00000295101,9606.ENSP00000299178,9606.ENSP00000306662,9606.ENSP00000309591,9606.ENSP00000315011,9606.ENSP00000322460,9606.ENSP00000328968,9606.ENSP00000350132,9606.ENSP00000352011,9606.ENSP00000355533,9606.ENSP00000355627,9606.ENSP00000360973,9606.ENSP00000361965,9606.ENSP00000366416,…	KCNQ1,MDM2,CACNA1C,CACNA1D,CALM3,KCNJ3,AVPR1A,ADRA1B,PRKACA,EDNRA,SCN4B,SCN5A,PLN,CACNA1G,RYR2,AGT,AGTR2,ADA,EDNRB,ADRA1D,ADRA1A,KCNE1,SLC8A1,SCN1B,TNF,CAMK2D,KCNJ5,TRPV1,KCNE1B,CALM1,CALM2
GO:0002028	Regulation of sodium ion transport	20	85	0.84	1.5	6.24e-09	KCNQ1,YWHAH,ACTN4,SLC9A3R1,SLC9A1,FXYD2,NOS3,PRKCE,SCN4B,SCN5A,DLG1,ATP2B4,AGT,NEDD4L,SLC8A1,SCN1B,CAMK2D,AKT1,NOS1,FXYD1
GO:0002034	Maintenance of blood vessel diameter homeostasis by renin-angiotensin	4	5	1.29	0.67	0.0023	9606.ENSP00000355627,9606.ENSP00000360973,9606.ENSP00000398832,9606.ENSP00000400175	AGT,AGTR2,AGTR1,RHOA
GO:0002035	Brain renin-angiotensin system	3	5	1.24	0.47	0.0148	AGT,ACE2,RPS6KA2
GO:0002035	Brain renin-angiotensin system	4	5	1.29	0.67	0.0023	9606.ENSP00000355627,9606.ENSP00000360973,9606.ENSP00000389326,9606.ENSP00000422435	AGT,AGTR2,ACE2,RPS6KA2
GO:0002036	Regulation of L-glutamate import across plasma membrane	3	8	0.96	0.34	0.0453	9606.ENSP00000326366,9606.ENSP00000379350,9606.ENSP00000398698	PSEN1,ITGB1,TNF
GO:0002042	Cell migration involved in sprouting angiogenesis	5	20	0.86	0.48	0.0106	PIK3R3,KDR,ITGB1,NR4A1,AKT1
GO:0002042	Cell migration involved in sprouting angiogenesis	5	20	0.78	0.43	0.0172	9606.ENSP00000262741,9606.ENSP00000263923,9606.ENSP00000379350,9606.ENSP00000440864,9606.ENSP00000451828	PIK3R3,KDR,ITGB1,NR4A1,AKT1
GO:0002154	Thyroid hormone mediated signaling pathway	3	3	1.46	0.58	0.0064	THRA,MED1,THRB
GO:0002154	Thyroid hormone mediated signaling pathway	3	3	1.38	0.54	0.0082	9606.ENSP00000264637,9606.ENSP00000300651,9606.ENSP00000379904	THRA,MED1,THRB
GO:0002155	Regulation of thyroid hormone mediated signaling pathway	5	6	1.39	0.93	0.00022	THRA,PRCP,THRB,NCOA1,RXRA
GO:0002155	Regulation of thyroid hormone mediated signaling pathway	5	6	1.3	0.86	0.00039	9606.ENSP00000264637,9606.ENSP00000377055,9606.ENSP00000379904,9606.ENSP00000385216,9606.ENSP00000419692	THRA,PRCP,THRB,NCOA1,RXRA
GO:0002157	Positive regulation of thyroid hormone mediated signaling pathway	3	3	1.46	0.58	0.0064	THRA,THRB,RXRA
GO:0002157	Positive regulation of thyroid hormone mediated signaling pathway	3	3	1.38	0.54	0.0082	9606.ENSP00000264637,9606.ENSP00000379904,9606.ENSP00000419692	THRA,THRB,RXRA
GO:0002218	Activation of innate immune response	15	65	0.83	1.19	1.03e-06	CREBBP,EP300,TBK1,HSP90AA1,FYN,TLR9,MAP3K7,SRC,TLR4,SYK,MAVS,LYN,IKBKB,TRAF6,PLCG2
GO:0002218	Activation of innate immune response	21	65	0.89	1.73	3.79e-10	9606.ENSP00000262367,9606.ENSP00000263253,9606.ENSP00000265164,9606.ENSP00000291744,9606.ENSP00000296280,9606.ENSP00000329967,9606.ENSP00000335153,9606.ENSP00000346671,9606.ENSP00000353874,9606.ENSP00000358335,9606.ENSP00000362680,9606.ENSP00000363079,9606.ENSP00000363089,9606.ENSP00000364898,9606.ENSP00000365012,9606.ENSP00000383690,9606.ENSP00000401980,9606.ENSP00000428924,9606.ENSP00000430684,…	CREBBP,EP300,CASP6,FCN2,MASP1,TBK1,HSP90AA1,FYN,TLR9,MAP3K7,SRC,MBL2,TLR4,SYK,HCK,MASP2,MAVS,LYN,IKBKB,TRAF6,PLCG2
GO:0002220	Innate immune response activating cell surface receptor signaling pathway	14	32	1.02	1.58	3.35e-08	9606.ENSP00000262367,9606.ENSP00000263253,9606.ENSP00000291744,9606.ENSP00000296280,9606.ENSP00000346671,9606.ENSP00000358335,9606.ENSP00000362680,9606.ENSP00000363079,9606.ENSP00000364898,9606.ENSP00000383690,9606.ENSP00000428924,9606.ENSP00000430684,9606.ENSP00000433623,9606.ENSP00000482457	CREBBP,EP300,FCN2,MASP1,FYN,MAP3K7,SRC,MBL2,SYK,MASP2,LYN,IKBKB,TRAF6,PLCG2
GO:0002221	Pattern recognition receptor signaling pathway	35	101	1.0	2.93	9.04e-20	NFKBIA,RIPK2,TICAM1,IRAK2,TLR2,LY96,PRKCE,PIK3AP1,HSPD1,TLR9,TLR1,MAPKAPK2,MAP3K7,IRAK1,TLR4,RPS6KA3,TIRAP,TRAF3,IRF7,RELA,CD14,TLR6,MAPKAPK3,TICAM2,LYN,TRAF6,MAP2K6,IRF3,TRIL,IRAK4,PLCG2,BTK,TLR5,BCL10,MYD88
GO:0002221	Pattern recognition receptor signaling pathway	39	101	0.97	2.95	8.92e-21	9606.ENSP00000216797,9606.ENSP00000220751,9606.ENSP00000248244,9606.ENSP00000256458,9606.ENSP00000260010,9606.ENSP00000284818,9606.ENSP00000291744,9606.ENSP00000296280,9606.ENSP00000306124,9606.ENSP00000339826,9606.ENSP00000340019,9606.ENSP00000353874,9606.ENSP00000354932,9606.ENSP00000356070,9606.ENSP00000358335,9606.ENSP00000358997,9606.ENSP00000363079,9606.ENSP00000363089,9606.ENSP00000368884,…	NFKBIA,RIPK2,TICAM1,IRAK2,TLR2,LY96,FCN2,MASP1,PRKCE,PIK3AP1,HSPD1,TLR9,TLR1,MAPKAPK2,MAP3K7,IRAK1,MBL2,TLR4,RPS6KA3,TIRAP,TRAF3,IRF7,MASP2,RELA,CD14,TLR6,MAPKAPK3,TNF,TICAM2,LYN,TRAF6,MAP2K6,TRIL,IRAK4,PLCG2,BTK,TLR5,BCL10,MYD88
GO:0002223	Stimulatory C-type lectin receptor signaling pathway	10	22	1.12	1.37	1.03e-06	CREBBP,EP300,FYN,MAP3K7,SRC,SYK,LYN,IKBKB,TRAF6,PLCG2
GO:0002223	Stimulatory C-type lectin receptor signaling pathway	10	22	1.04	1.22	4.06e-06	9606.ENSP00000262367,9606.ENSP00000263253,9606.ENSP00000346671,9606.ENSP00000358335,9606.ENSP00000362680,9606.ENSP00000364898,9606.ENSP00000428924,9606.ENSP00000430684,9606.ENSP00000433623,9606.ENSP00000482457	CREBBP,EP300,FYN,MAP3K7,SRC,SYK,LYN,IKBKB,TRAF6,PLCG2
GO:0002224	Toll-like receptor signaling pathway	32	61	1.18	3.73	2.60e-22	NFKBIA,RIPK2,TICAM1,IRAK2,TLR2,LY96,PRKCE,PIK3AP1,HSPD1,TLR9,TLR1,MAPKAPK2,MAP3K7,IRAK1,TLR4,RPS6KA3,TIRAP,TRAF3,CD14,TLR6,MAPKAPK3,TICAM2,LYN,TRAF6,IRF3,TRIL,IRAK4,PLCG2,BTK,TLR5,BCL10,MYD88
GO:0002224	Toll-like receptor signaling pathway	32	61	1.1	3.28	4.16e-20	9606.ENSP00000216797,9606.ENSP00000220751,9606.ENSP00000248244,9606.ENSP00000256458,9606.ENSP00000260010,9606.ENSP00000284818,9606.ENSP00000306124,9606.ENSP00000339826,9606.ENSP00000340019,9606.ENSP00000353874,9606.ENSP00000354932,9606.ENSP00000356070,9606.ENSP00000358335,9606.ENSP00000358997,9606.ENSP00000363089,9606.ENSP00000368884,9606.ENSP00000376445,9606.ENSP00000376500,9606.ENSP00000385519,…	NFKBIA,RIPK2,TICAM1,IRAK2,TLR2,LY96,PRKCE,PIK3AP1,HSPD1,TLR9,TLR1,MAPKAPK2,MAP3K7,IRAK1,TLR4,RPS6KA3,TIRAP,TRAF3,CD14,TLR6,MAPKAPK3,TNF,TICAM2,LYN,TRAF6,TRIL,IRAK4,PLCG2,BTK,TLR5,BCL10,MYD88
GO:0002230	Positive regulation of defense response to virus by host	9	34	0.81	0.76	0.00041	9606.ENSP00000228534,9606.ENSP00000231228,9606.ENSP00000321345,9606.ENSP00000335153,9606.ENSP00000342136,9606.ENSP00000348089,9606.ENSP00000354394,9606.ENSP00000401980,9606.ENSP00000470788	IL23A,IL12B,IL23R,HSP90AA1,CREB3,ERCC6,STAT1,MAVS,IL12RB1
GO:0002238	Response to molecule of fungal origin	3	5	1.24	0.47	0.0148	SYK,BTK,MYD88
GO:0002238	Response to molecule of fungal origin	3	5	1.16	0.44	0.0192	9606.ENSP00000364898,9606.ENSP00000483570,9606.ENSP00000498321	SYK,BTK,MYD88
GO:0002246	Wound healing involved in inflammatory response	4	7	1.14	0.58	0.0050	9606.ENSP00000221930,9606.ENSP00000321326,9606.ENSP00000363089,9606.ENSP00000437955	TGFB1,F2R,TLR4,HIF1A
GO:0002248	Connective tissue replacement involved in inflammatory response wound healing	3	5	1.16	0.44	0.0192	9606.ENSP00000221930,9606.ENSP00000321326,9606.ENSP00000437955	TGFB1,F2R,HIF1A
GO:0002253	Activation of immune response	82	271	0.86	3.37	9.89e-38	9606.ENSP00000215832,9606.ENSP00000220751,9606.ENSP00000243611,9606.ENSP00000244007,9606.ENSP00000245907,9606.ENSP00000247153,9606.ENSP00000262367,9606.ENSP00000263253,9606.ENSP00000263967,9606.ENSP00000264316,9606.ENSP00000264972,9606.ENSP00000265164,9606.ENSP00000278407,9606.ENSP00000289902,9606.ENSP00000291744,9606.ENSP00000293288,9606.ENSP00000296280,9606.ENSP00000299367,9606.ENSP00000306124,…	MAPK1,RIPK2,C4BPB,PLCG1,C3,CFP,CREBBP,EP300,PIK3CA,TXK,ZAP70,CASP6,SERPING1,FCER1G,FCN2,BAX,MASP1,C2,PRKCE,CD19,CD46,C1QB,CFHR1,CD28,PSEN1,TBK1,PRKCD,HSP90AA1,PTK2,CRKL,FYN,TLR9,CR2,CFH,MAP3K7,VAV3,VAV2,ADA,SRC,MBL2,TLR4,FGR,C1QC,C1QA,VSIG4,SYK,HCK,PIK3CD,CFI,NFATC2,HLA-A,BCL2,MASP2,C1S,PTPN6,PRKD2,C4A,ITK,MAVS,INPP5D,HRAS,B4E1Z4_HUMAN,C4B,CFB,BRAF,LYN,IKBKB,IGLL5,TRAF6,C1R,CFD,VAV1,LOC102723407,…
GO:0002265	Astrocyte activation involved in immune response	3	4	1.26	0.49	0.0129	9606.ENSP00000243077,9606.ENSP00000284981,9606.ENSP00000326366	LRP1,APP,PSEN1
GO:0002269	Leukocyte activation involved in inflammatory response	12	34	1.01	1.37	4.87e-07	TLR2,MAPT,TLR9,IFNGR1,JUN,AGER,JAK2,ITGB2,TLR6,TRPV1,ITGAM,MYD88
GO:0002269	Leukocyte activation involved in inflammatory response	14	34	1.0	1.52	6.03e-08	9606.ENSP00000260010,9606.ENSP00000284981,9606.ENSP00000353874,9606.ENSP00000356713,9606.ENSP00000360266,9606.ENSP00000363773,9606.ENSP00000371067,9606.ENSP00000380948,9606.ENSP00000389600,9606.ENSP00000398698,9606.ENSP00000459962,9606.ENSP00000496959,9606.ENSP00000498321,9606.ENSP00000500990	TLR2,APP,TLR9,IFNGR1,JUN,C1QA,JAK2,ITGB2,TLR6,TNF,TRPV1,ITGAM,MYD88,SNCA
GO:0002274	Myeloid leukocyte activation	32	150	0.79	1.86	4.06e-13	ITGB8,TICAM1,TLR2,CBL,ITGB6,KIT,FCER1G,PRKCE,RASGRP1,PRKCD,MAPT,TLR9,TLR1,IFNGR1,JUN,PREX1,TLR4,AGER,SYK,PIK3CD,JAK2,ITGB2,TLR6,S100A13,PIK3CG,LYN,TRAF6,TRPV1,PLCG2,BTK,ITGAM,MYD88
GO:0002274	Myeloid leukocyte activation	35	150	0.75	1.81	3.75e-13	9606.ENSP00000221930,9606.ENSP00000222573,9606.ENSP00000248244,9606.ENSP00000260010,9606.ENSP00000264033,9606.ENSP00000282356,9606.ENSP00000283249,9606.ENSP00000284981,9606.ENSP00000288135,9606.ENSP00000289902,9606.ENSP00000306124,9606.ENSP00000326366,9606.ENSP00000331602,9606.ENSP00000353874,9606.ENSP00000354932,9606.ENSP00000356713,9606.ENSP00000360266,9606.ENSP00000361009,9606.ENSP00000363089,…	TGFB1,ITGB8,TICAM1,TLR2,CBL,CAMK4,ITGB6,APP,KIT,FCER1G,PRKCE,PSEN1,PRKCD,TLR9,TLR1,IFNGR1,JUN,PREX1,TLR4,C1QA,SYK,PIK3CD,JAK2,ITGB2,TLR6,TNF,PIK3CG,LYN,TRAF6,TRPV1,PLCG2,BTK,ITGAM,MYD88,SNCA
GO:0002275	Myeloid cell activation involved in immune response	14	61	0.83	1.13	2.87e-06	TICAM1,CBL,KIT,FCER1G,PRKCE,RASGRP1,SYK,PIK3CD,S100A13,PIK3CG,LYN,PLCG2,BTK,MYD88
GO:0002281	Macrophage activation involved in immune response	4	19	0.79	0.34	0.0446	TICAM1,PRKCE,SYK,PLCG2
GO:0002295	T-helper cell lineage commitment	4	12	0.91	0.43	0.0192	9606.ENSP00000264657,9606.ENSP00000300134,9606.ENSP00000354558,9606.ENSP00000357470	STAT3,STAT6,MTOR,IL6R
GO:0002318	Myeloid progenitor cell differentiation	3	7	1.1	0.4	0.0276	FLT3,KIT,BRAF
GO:0002318	Myeloid progenitor cell differentiation	3	7	1.02	0.37	0.0352	9606.ENSP00000241453,9606.ENSP00000288135,9606.ENSP00000419060	FLT3,KIT,BRAF
GO:0002339	B cell selection	3	5	1.16	0.44	0.0192	9606.ENSP00000293288,9606.ENSP00000363591,9606.ENSP00000483570	BAX,BAK1,BTK
GO:0002352	B cell negative selection	2	2	1.38	0.35	0.0489	9606.ENSP00000293288,9606.ENSP00000363591	BAX,BAK1
GO:0002360	T cell lineage commitment	8	24	0.91	0.81	0.00029	9606.ENSP00000264657,9606.ENSP00000269305,9606.ENSP00000300134,9606.ENSP00000354558,9606.ENSP00000357470,9606.ENSP00000381185,9606.ENSP00000400175,9606.ENSP00000419060	STAT3,TP53,STAT6,MTOR,IL6R,BCL2,RHOA,BRAF
GO:0002363	Alpha-beta T cell lineage commitment	6	17	0.93	0.65	0.0019	9606.ENSP00000264657,9606.ENSP00000300134,9606.ENSP00000354558,9606.ENSP00000357470,9606.ENSP00000381185,9606.ENSP00000400175	STAT3,STAT6,MTOR,IL6R,BCL2,RHOA
GO:0002429	Immune response-activating cell surface receptor signaling pathway	45	197	0.82	2.38	2.20e-19	MAPK1,RIPK2,BLNK,PLCG1,CREBBP,EP300,PIK3CA,TXK,ZAP70,FCER1G,BAX,PRKCE,CD19,CD28,PRKCD,PTK2,CRKL,FYN,MAP3K7,VAV3,VAV2,ADA,SRC,SYK,PIK3CD,NFATC2,PTPN6,ITK,INPP5D,HRAS,BRAF,LYN,IKBKB,TRAF6,VAV1,IGHV3-16,IGHV3-72,IGHV3-43D,PLCG2,BTK,IKBKG,PRKCB,MALT1,BCL10,CBLB
GO:0002429	Immune response-activating cell surface receptor signaling pathway	56	197	0.84	2.74	1.85e-24	9606.ENSP00000215832,9606.ENSP00000220751,9606.ENSP00000244007,9606.ENSP00000262367,9606.ENSP00000263253,9606.ENSP00000263967,9606.ENSP00000264316,9606.ENSP00000264972,9606.ENSP00000289902,9606.ENSP00000291744,9606.ENSP00000293288,9606.ENSP00000296280,9606.ENSP00000306124,9606.ENSP00000313419,9606.ENSP00000324890,9606.ENSP00000326366,9606.ENSP00000331602,9606.ENSP00000341189,9606.ENSP00000346300,…	MAPK1,RIPK2,PLCG1,CREBBP,EP300,PIK3CA,TXK,ZAP70,FCER1G,FCN2,BAX,MASP1,PRKCE,CD19,CD28,PSEN1,PRKCD,PTK2,CRKL,FYN,CR2,MAP3K7,VAV3,VAV2,ADA,SRC,MBL2,FGR,SYK,HCK,PIK3CD,NFATC2,HLA-A,BCL2,MASP2,PTPN6,PRKD2,ITK,INPP5D,HRAS,BRAF,LYN,IKBKB,IGLL5,TRAF6,VAV1,LOC102723407,IGHV3-72,IGHV3-43D,PLCG2,BTK,IKBKG,PRKCB,MALT1,BCL10,CBLB
GO:0002431	Fc receptor mediated stimulatory signaling pathway	11	24	1.13	1.5	2.33e-07	FCER1G,PRKCE,PRKCD,PTK2,FYN,VAV3,VAV2,SRC,SYK,LYN,VAV1
GO:0002431	Fc receptor mediated stimulatory signaling pathway	13	24	1.12	1.7	1.78e-08	9606.ENSP00000289902,9606.ENSP00000306124,9606.ENSP00000331602,9606.ENSP00000341189,9606.ENSP00000346671,9606.ENSP00000359073,9606.ENSP00000360916,9606.ENSP00000362680,9606.ENSP00000363117,9606.ENSP00000364898,9606.ENSP00000365012,9606.ENSP00000428924,9606.ENSP00000472929	FCER1G,PRKCE,PRKCD,PTK2,FYN,VAV3,VAV2,SRC,FGR,SYK,HCK,LYN,VAV1
GO:0002444	Myeloid leukocyte mediated immunity	12	58	0.78	0.91	4.68e-05	CBL,KIT,RASGRP1,CARD9,SYK,PIK3CD,S100A13,PIK3CG,LYN,IRAK4,BTK,MYD88
GO:0002460	Adaptive immune response based on somatic recombination of immune receptors built from immunoglobulin superfamily domains	44	169	0.8	2.26	5.55e-18	9606.ENSP00000221930,9606.ENSP00000231228,9606.ENSP00000243611,9606.ENSP00000245907,9606.ENSP00000264657,9606.ENSP00000278407,9606.ENSP00000289902,9606.ENSP00000299367,9606.ENSP00000300134,9606.ENSP00000313419,9606.ENSP00000313875,9606.ENSP00000313967,9606.ENSP00000327025,9606.ENSP00000331602,9606.ENSP00000338010,9606.ENSP00000340019,9606.ENSP00000354558,9606.ENSP00000356024,9606.ENSP00000357470,…	TGFB1,IL12B,C4BPB,C3,STAT3,SERPING1,FCER1G,C2,STAT6,CD19,CD46,C1QB,RORC,PRKCD,IL21R,HSPD1,MTOR,CR2,IL6R,CARD9,ADA,MBL2,TLR4,C1QC,C1QA,CFI,PPP3CB,HLA-A,IRF7,MASP2,C1S,C4A,INPP5D,HRAS,C4B,IGLL5,TRAF6,C1R,LOC102723407,IGHV3-72,IGHV3-43D,BTK,BCL10,MYD88
GO:0002532	Production of molecular mediator involved in inflammatory response	4	16	0.86	0.39	0.0284	TLR4,SYK,LYN,BTK
GO:0002532	Production of molecular mediator involved in inflammatory response	4	16	0.78	0.34	0.0407	9606.ENSP00000363089,9606.ENSP00000364898,9606.ENSP00000428924,9606.ENSP00000483570	TLR4,SYK,LYN,BTK
GO:0002679	Respiratory burst involved in defense response	3	8	0.96	0.34	0.0453	9606.ENSP00000365012,9606.ENSP00000366563,9606.ENSP00000419260	HCK,PIK3CD,PIK3CG
GO:0002711	Positive regulation of T cell mediated immunity	13	56	0.75	0.92	3.44e-05	9606.ENSP00000228534,9606.ENSP00000231228,9606.ENSP00000247668,9606.ENSP00000303231,9606.ENSP00000321345,9606.ENSP00000340019,9606.ENSP00000358335,9606.ENSP00000367830,9606.ENSP00000379873,9606.ENSP00000386380,9606.ENSP00000433623,9606.ENSP00000470788,9606.ENSP00000497997	IL23A,IL12B,TRAF2,IL12A,IL23R,HSPD1,MAP3K7,PRKCZ,HLA-A,IL1R1,TRAF6,IL12RB1,MALT1
GO:0002720	Positive regulation of cytokine production involved in immune response	17	81	0.79	1.21	4.78e-07	RIPK2,TRAF2,TICAM1,KIT,MAPKAPK2,MAP3K7,CARD9,TLR4,SYK,PRKCZ,IL1R1,MAVS,TRAF6,PLCG2,MALT1,BCL10,MYD88
GO:0002726	Positive regulation of T cell cytokine production	6	26	0.83	0.54	0.0055	TRAF2,MAP3K7,PRKCZ,IL1R1,TRAF6,MALT1
GO:0002726	Positive regulation of T cell cytokine production	7	26	0.81	0.61	0.0023	9606.ENSP00000247668,9606.ENSP00000358335,9606.ENSP00000367830,9606.ENSP00000379873,9606.ENSP00000386380,9606.ENSP00000433623,9606.ENSP00000497997	TRAF2,MAP3K7,PRKCZ,HLA-A,IL1R1,TRAF6,MALT1
GO:0002730	Regulation of dendritic cell cytokine production	7	16	1.11	0.96	9.90e-05	TICAM1,KIT,TLR9,TLR4,MAVS,JAK3,PLCG2
GO:0002730	Regulation of dendritic cell cytokine production	7	16	1.02	0.86	0.00023	9606.ENSP00000248244,9606.ENSP00000288135,9606.ENSP00000353874,9606.ENSP00000363089,9606.ENSP00000401980,9606.ENSP00000432511,9606.ENSP00000482457	TICAM1,KIT,TLR9,TLR4,MAVS,JAK3,PLCG2
GO:0002732	Positive regulation of dendritic cell cytokine production	4	11	1.03	0.5	0.0107	TICAM1,KIT,MAVS,PLCG2
GO:0002732	Positive regulation of dendritic cell cytokine production	4	11	0.94	0.45	0.0154	9606.ENSP00000248244,9606.ENSP00000288135,9606.ENSP00000401980,9606.ENSP00000482457	TICAM1,KIT,MAVS,PLCG2
GO:0002752	Cell surface pattern recognition receptor signaling pathway	4	9	1.03	0.51	0.0093	9606.ENSP00000291744,9606.ENSP00000296280,9606.ENSP00000363079,9606.ENSP00000383690	FCN2,MASP1,MBL2,MASP2
GO:0002753	Cytoplasmic pattern recognition receptor signaling pathway	9	28	0.97	1.0	4.00e-05	NFKBIA,RIPK2,MAP3K7,TLR4,IRF7,RELA,TRAF6,MAP2K6,IRF3
GO:0002753	Cytoplasmic pattern recognition receptor signaling pathway	8	28	0.84	0.73	0.00065	9606.ENSP00000216797,9606.ENSP00000220751,9606.ENSP00000358335,9606.ENSP00000363089,9606.ENSP00000380697,9606.ENSP00000384273,9606.ENSP00000433623,9606.ENSP00000468348	NFKBIA,RIPK2,MAP3K7,TLR4,IRF7,RELA,TRAF6,MAP2K6
GO:0002755	MyD88-dependent toll-like receptor signaling pathway	15	21	1.32	2.49	6.33e-12	IRAK2,TLR2,HSPD1,TLR9,TLR1,MAP3K7,IRAK1,TLR4,TIRAP,TLR6,TRAF6,IRAK4,BTK,TLR5,MYD88
GO:0002755	MyD88-dependent toll-like receptor signaling pathway	15	21	1.24	2.24	6.12e-11	9606.ENSP00000256458,9606.ENSP00000260010,9606.ENSP00000340019,9606.ENSP00000353874,9606.ENSP00000354932,9606.ENSP00000358335,9606.ENSP00000358997,9606.ENSP00000363089,9606.ENSP00000376445,9606.ENSP00000389600,9606.ENSP00000433623,9606.ENSP00000479889,9606.ENSP00000483570,9606.ENSP00000496355,9606.ENSP00000498321	IRAK2,TLR2,HSPD1,TLR9,TLR1,MAP3K7,IRAK1,TLR4,TIRAP,TLR6,TRAF6,IRAK4,BTK,TLR5,MYD88
GO:0002756	MyD88-independent toll-like receptor signaling pathway	7	12	1.23	1.12	2.52e-05	TICAM1,PRKCE,TLR4,TRAF3,TLR6,TICAM2,IRF3
GO:0002756	MyD88-independent toll-like receptor signaling pathway	6	12	1.08	0.81	0.00048	9606.ENSP00000248244,9606.ENSP00000306124,9606.ENSP00000363089,9606.ENSP00000376500,9606.ENSP00000389600,9606.ENSP00000415139	TICAM1,PRKCE,TLR4,TRAF3,TLR6,TICAM2
GO:0002758	Innate immune response-activating signal transduction	15	33	1.04	1.71	6.33e-09	9606.ENSP00000262367,9606.ENSP00000263253,9606.ENSP00000291744,9606.ENSP00000296280,9606.ENSP00000346671,9606.ENSP00000358335,9606.ENSP00000362680,9606.ENSP00000363079,9606.ENSP00000364898,9606.ENSP00000365012,9606.ENSP00000383690,9606.ENSP00000428924,9606.ENSP00000430684,9606.ENSP00000433623,9606.ENSP00000482457	CREBBP,EP300,FCN2,MASP1,FYN,MAP3K7,SRC,MBL2,SYK,HCK,MASP2,LYN,IKBKB,TRAF6,PLCG2
GO:0002764	Immune response-regulating signaling pathway	80	312	0.87	3.36	5.24e-38	MAPK1,NFKBIA,RIPK2,BLNK,PLCG1,TICAM1,IRAK2,TLR2,CREBBP,PRKCQ,EP300,PIK3CA,TXK,ZAP70,LY96,KIT,FCER1G,BAX,PRKCE,CD19,CD28,PRKCD,PIK3AP1,HSPD1,PTK2,CRKL,FYN,TLR9,TLR1,MAPKAPK2,MAP3K7,IRAK1,VAV3,VAV2,ADA,SRC,TLR4,SYK,PIK3CD,RPS6KA3,TIRAP,TRAF3,MAPK8,NFATC2,IRF7,MAP2K7,MAP3K1,RELA,SOS1,CD14,TLR6,PTPN6,MAPK9,MAPKAPK3,ITK,INPP5D,HRAS,MAP2K4,TICAM2,BRAF,LYN,IKBKB,TRAF6,MAP2K6,IRF3,VAV1,IGHV3-16,TRIL,IRAK…
GO:0002764	Immune response-regulating signaling pathway	90	312	0.84	3.33	3.76e-40	9606.ENSP00000215832,9606.ENSP00000216797,9606.ENSP00000220751,9606.ENSP00000244007,9606.ENSP00000248244,9606.ENSP00000256458,9606.ENSP00000260010,9606.ENSP00000262367,9606.ENSP00000263125,9606.ENSP00000263253,9606.ENSP00000263967,9606.ENSP00000264316,9606.ENSP00000264972,9606.ENSP00000284818,9606.ENSP00000288135,9606.ENSP00000289902,9606.ENSP00000291744,9606.ENSP00000293288,9606.ENSP00000296280,…	MAPK1,NFKBIA,RIPK2,PLCG1,TICAM1,IRAK2,TLR2,CREBBP,PRKCQ,EP300,PIK3CA,TXK,ZAP70,LY96,KIT,FCER1G,FCN2,BAX,MASP1,PRKCE,CD19,CD28,PSEN1,PRKCD,PIK3AP1,HSPD1,PTK2,CRKL,FYN,TLR9,TLR1,CR2,MAPKAPK2,MAP3K7,IRAK1,VAV3,VAV2,ADA,SRC,MBL2,TLR4,FGR,SYK,HCK,PIK3CD,RPS6KA3,TIRAP,TRAF3,MAPK8,NFATC2,HLA-A,IRF7,MAP2K7,BCL2,MAP3K1,MASP2,RELA,CD14,TLR6,PTPN6,PRKD2,MAPK9,MAPKAPK3,ITK,TNF,INPP5D,HRAS,MAP2K4,TICAM2,BRAF,…
GO:0002768	Immune response-regulating cell surface receptor signaling pathway	53	228	0.83	2.61	3.55e-23	MAPK1,RIPK2,BLNK,PLCG1,CREBBP,PRKCQ,EP300,PIK3CA,TXK,ZAP70,KIT,FCER1G,BAX,PRKCE,CD19,CD28,PRKCD,PTK2,CRKL,FYN,MAP3K7,VAV3,VAV2,ADA,SRC,SYK,PIK3CD,MAPK8,NFATC2,MAP2K7,MAP3K1,SOS1,PTPN6,MAPK9,ITK,INPP5D,HRAS,MAP2K4,BRAF,LYN,IKBKB,TRAF6,VAV1,IGHV3-16,IGHV3-72,IGHV3-43D,PLCG2,BTK,IKBKG,PRKCB,MALT1,BCL10,CBLB
GO:0002768	Immune response-regulating cell surface receptor signaling pathway	63	228	0.83	2.81	5.62e-27	9606.ENSP00000215832,9606.ENSP00000220751,9606.ENSP00000244007,9606.ENSP00000262367,9606.ENSP00000263125,9606.ENSP00000263253,9606.ENSP00000263967,9606.ENSP00000264316,9606.ENSP00000264972,9606.ENSP00000288135,9606.ENSP00000289902,9606.ENSP00000291744,9606.ENSP00000293288,9606.ENSP00000296280,9606.ENSP00000306124,9606.ENSP00000313419,9606.ENSP00000324890,9606.ENSP00000326366,9606.ENSP00000331602,…	MAPK1,RIPK2,PLCG1,CREBBP,PRKCQ,EP300,PIK3CA,TXK,ZAP70,KIT,FCER1G,FCN2,BAX,MASP1,PRKCE,CD19,CD28,PSEN1,PRKCD,PTK2,CRKL,FYN,CR2,MAP3K7,VAV3,VAV2,ADA,SRC,MBL2,FGR,SYK,HCK,PIK3CD,MAPK8,NFATC2,HLA-A,MAP2K7,BCL2,MAP3K1,MASP2,PTPN6,PRKD2,MAPK9,ITK,INPP5D,HRAS,MAP2K4,BRAF,LYN,IKBKB,IGLL5,TRAF6,VAV1,LOC102723407,IGHV3-72,IGHV3-43D,PLCG2,BTK,IKBKG,PRKCB,MALT1,BCL10,CBLB
GO:0002821	Positive regulation of adaptive immune response	27	116	0.75	1.55	3.30e-10	9606.ENSP00000220751,9606.ENSP00000221930,9606.ENSP00000226730,9606.ENSP00000228534,9606.ENSP00000231228,9606.ENSP00000245907,9606.ENSP00000247668,9606.ENSP00000263125,9606.ENSP00000300134,9606.ENSP00000303231,9606.ENSP00000321345,9606.ENSP00000324890,9606.ENSP00000340019,9606.ENSP00000358335,9606.ENSP00000360797,9606.ENSP00000361965,9606.ENSP00000367830,9606.ENSP00000370698,9606.ENSP00000371067,…	RIPK2,TGFB1,IL2,IL23A,IL12B,C3,TRAF2,PRKCQ,STAT6,IL12A,IL23R,CD28,HSPD1,MAP3K7,CARD9,ADA,PRKCZ,IL6ST,JAK2,HLA-A,IL1R1,TNF,TYK2,TRAF6,IL12RB1,BTK,MALT1
GO:0002824	Positive regulation of adaptive immune response based on somatic recombination of immune receptors built from immunoglobulin superfamily domains	26	110	0.76	1.53	5.78e-10	9606.ENSP00000220751,9606.ENSP00000221930,9606.ENSP00000226730,9606.ENSP00000228534,9606.ENSP00000231228,9606.ENSP00000245907,9606.ENSP00000247668,9606.ENSP00000263125,9606.ENSP00000300134,9606.ENSP00000303231,9606.ENSP00000321345,9606.ENSP00000324890,9606.ENSP00000340019,9606.ENSP00000358335,9606.ENSP00000360797,9606.ENSP00000361965,9606.ENSP00000367830,9606.ENSP00000371067,9606.ENSP00000379873,…	RIPK2,TGFB1,IL2,IL23A,IL12B,C3,TRAF2,PRKCQ,STAT6,IL12A,IL23R,CD28,HSPD1,MAP3K7,CARD9,ADA,PRKCZ,JAK2,HLA-A,IL1R1,TNF,TYK2,TRAF6,IL12RB1,BTK,MALT1
GO:0002827	Positive regulation of T-helper 1 type immune response	6	19	0.88	0.6	0.0029	9606.ENSP00000220751,9606.ENSP00000228534,9606.ENSP00000231228,9606.ENSP00000321345,9606.ENSP00000386380,9606.ENSP00000470788	RIPK2,IL23A,IL12B,IL23R,IL1R1,IL12RB1
GO:0002834	Regulation of response to tumor cell	5	21	0.76	0.41	0.0198	9606.ENSP00000231228,9606.ENSP00000242057,9606.ENSP00000303231,9606.ENSP00000340019,9606.ENSP00000386135	IL12B,AHR,IL12A,HSPD1,DAPK1
GO:0002861	Regulation of inflammatory response to antigenic stimulus	13	42	0.87	1.16	2.68e-06	9606.ENSP00000229795,9606.ENSP00000231228,9606.ENSP00000244007,9606.ENSP00000245907,9606.ENSP00000324890,9606.ENSP00000346671,9606.ENSP00000362680,9606.ENSP00000363117,9606.ENSP00000364898,9606.ENSP00000365012,9606.ENSP00000398698,9606.ENSP00000428924,9606.ENSP00000483570	MAPK14,IL12B,PLCG1,C3,CD28,FYN,SRC,FGR,SYK,HCK,TNF,LYN,BTK
GO:0002862	Negative regulation of inflammatory response to antigenic stimulus	6	27	0.81	0.52	0.0064	MAPK14,PLCG1,FYN,SRC,SYK,LYN
GO:0002862	Negative regulation of inflammatory response to antigenic stimulus	9	27	0.91	0.9	9.82e-05	9606.ENSP00000229795,9606.ENSP00000231228,9606.ENSP00000244007,9606.ENSP00000346671,9606.ENSP00000362680,9606.ENSP00000363117,9606.ENSP00000364898,9606.ENSP00000365012,9606.ENSP00000428924	MAPK14,IL12B,PLCG1,FYN,SRC,FGR,SYK,HCK,LYN
GO:0002863	Positive regulation of inflammatory response to antigenic stimulus	4	13	0.87	0.4	0.0237	9606.ENSP00000245907,9606.ENSP00000324890,9606.ENSP00000398698,9606.ENSP00000483570	C3,CD28,TNF,BTK
GO:0002888	Positive regulation of myeloid leukocyte mediated immunity	5	21	0.84	0.46	0.0124	TICAM1,ITGB2,MAVS,BTK,ITGAM
GO:0002888	Positive regulation of myeloid leukocyte mediated immunity	6	21	0.84	0.56	0.0044	9606.ENSP00000245907,9606.ENSP00000248244,9606.ENSP00000380948,9606.ENSP00000401980,9606.ENSP00000483570,9606.ENSP00000496959	C3,TICAM1,ITGB2,MAVS,BTK,ITGAM
GO:0002902	Regulation of B cell apoptotic process	9	22	1.08	1.17	8.74e-06	IL2,BAX,PTEN,ADA,IRS2,FNIP1,LYN,BTK,BCL10
GO:0002902	Regulation of B cell apoptotic process	9	22	1.0	1.04	2.77e-05	9606.ENSP00000226730,9606.ENSP00000293288,9606.ENSP00000361021,9606.ENSP00000361965,9606.ENSP00000365016,9606.ENSP00000381185,9606.ENSP00000428924,9606.ENSP00000483570,9606.ENSP00000498104	IL2,BAX,PTEN,ADA,IRS2,BCL2,LYN,BTK,BCL10
GO:0002903	Negative regulation of B cell apoptotic process	4	15	0.89	0.4	0.0240	IL2,ADA,IRS2,BCL10
GO:0002903	Negative regulation of B cell apoptotic process	5	15	0.91	0.53	0.0068	9606.ENSP00000226730,9606.ENSP00000361965,9606.ENSP00000365016,9606.ENSP00000381185,9606.ENSP00000498104	IL2,ADA,IRS2,BCL2,BCL10
GO:0002920	Regulation of humoral immune response	11	46	0.76	0.82	0.00014	9606.ENSP00000243611,9606.ENSP00000245907,9606.ENSP00000278407,9606.ENSP00000296280,9606.ENSP00000313875,9606.ENSP00000356024,9606.ENSP00000356399,9606.ENSP00000363869,9606.ENSP00000378131,9606.ENSP00000391592,9606.ENSP00000398698	C4BPB,C3,SERPING1,MASP1,CD46,CR2,CFH,VSIG4,CFI,PTPN6,TNF
GO:0002921	Negative regulation of humoral immune response	7	18	0.97	0.8	0.00040	9606.ENSP00000243611,9606.ENSP00000278407,9606.ENSP00000296280,9606.ENSP00000313875,9606.ENSP00000356024,9606.ENSP00000363869,9606.ENSP00000391592	C4BPB,SERPING1,MASP1,CD46,CR2,VSIG4,PTPN6
GO:0002923	Regulation of humoral immune response mediated by circulating immunoglobulin	5	19	0.8	0.45	0.0144	9606.ENSP00000243611,9606.ENSP00000313875,9606.ENSP00000356024,9606.ENSP00000391592,9606.ENSP00000398698	C4BPB,CD46,CR2,PTPN6,TNF
GO:0002924	Negative regulation of humoral immune response mediated by circulating immunoglobulin	4	12	0.91	0.43	0.0192	9606.ENSP00000243611,9606.ENSP00000313875,9606.ENSP00000356024,9606.ENSP00000391592	C4BPB,CD46,CR2,PTPN6
GO:0003015	Heart process	30	108	0.91	2.25	7.73e-15	KCNQ1,NOX4,PIK3CA,SLC9A1,KCNN2,CACNA1C,GJA1,CACNA1D,KCNJ3,SCN4B,SCN5A,TNNI3,MAP2K3,FYN,PLN,MTOR,RYR2,SRC,MYLK2,KCNE1,NEDD4L,SLC8A1,SCN1B,WWTR1,RPS6KA2,CAMK2D,KCNJ5,MAP2K6,KCNE1B,CDC42
GO:0003015	Heart process	30	108	0.83	1.93	6.18e-13	9606.ENSP00000155840,9606.ENSP00000263967,9606.ENSP00000263980,9606.ENSP00000264773,9606.ENSP00000266376,9606.ENSP00000288139,9606.ENSP00000295101,9606.ENSP00000311127,9606.ENSP00000315011,9606.ENSP00000322460,9606.ENSP00000328968,9606.ENSP00000345083,9606.ENSP00000346671,9606.ENSP00000350132,9606.ENSP00000352011,9606.ENSP00000354558,9606.ENSP00000354718,9606.ENSP00000355533,9606.ENSP00000362680,…	KCNQ1,PIK3CA,SLC9A1,KCNN2,CACNA1C,CACNA1D,KCNJ3,VEGFB,EDNRA,SCN4B,SCN5A,MAP2K3,FYN,PLN,CACNA1G,MTOR,AKAP13,RYR2,SRC,MYLK2,KCNE1,SLC8A1,CXCR4,SCN1B,RPS6KA2,CAMK2D,KCNJ5,MAP2K6,KCNE1B,CDC42
GO:0003044	Regulation of systemic arterial blood pressure mediated by a chemical signal	15	47	0.89	1.33	2.55e-07	9606.ENSP00000261623,9606.ENSP00000297494,9606.ENSP00000299178,9606.ENSP00000306662,9606.ENSP00000355627,9606.ENSP00000356094,9606.ENSP00000360973,9606.ENSP00000366416,9606.ENSP00000368766,9606.ENSP00000369960,9606.ENSP00000389326,9606.ENSP00000398832,9606.ENSP00000400175,9606.ENSP00000422435,9606.ENSP00000496396	CYBA,NOS3,AVPR1A,ADRA1B,AGT,AVPR1B,AGTR2,EDNRB,ADRA1D,ADRA1A,ACE2,AGTR1,RHOA,RPS6KA2,AVPR2
GO:0003071	Renal system process involved in regulation of systemic arterial blood pressure	7	24	0.85	0.66	0.0015	9606.ENSP00000261623,9606.ENSP00000321326,9606.ENSP00000355627,9606.ENSP00000360973,9606.ENSP00000366416,9606.ENSP00000398832,9606.ENSP00000400175	CYBA,F2R,AGT,AGTR2,EDNRB,AGTR1,RHOA
GO:0003081	Regulation of systemic arterial blood pressure by renin-angiotensin	6	22	0.9	0.61	0.0028	CYBA,AGT,NOX1,ACE2,RHOA,RPS6KA2
GO:0003081	Regulation of systemic arterial blood pressure by renin-angiotensin	8	22	0.94	0.86	0.00018	9606.ENSP00000261623,9606.ENSP00000355627,9606.ENSP00000360973,9606.ENSP00000366416,9606.ENSP00000389326,9606.ENSP00000398832,9606.ENSP00000400175,9606.ENSP00000422435	CYBA,AGT,AGTR2,EDNRB,ACE2,AGTR1,RHOA,RPS6KA2
GO:0003084	Positive regulation of systemic arterial blood pressure	6	14	1.02	0.74	0.00088	9606.ENSP00000261623,9606.ENSP00000299178,9606.ENSP00000369647,9606.ENSP00000369960,9606.ENSP00000400175,9606.ENSP00000496396	CYBA,AVPR1A,AVP,ADRA1A,RHOA,AVPR2
GO:0003096	Renal sodium ion transport	5	13	0.97	0.58	0.0043	9606.ENSP00000155840,9606.ENSP00000262613,9606.ENSP00000315011,9606.ENSP00000356832,9606.ENSP00000366416	KCNQ1,SLC9A3R1,EDNRA,SGK1,EDNRB
GO:0003300	Cardiac muscle hypertrophy	7	30	0.75	0.55	0.0043	9606.ENSP00000354718,9606.ENSP00000355533,9606.ENSP00000355627,9606.ENSP00000369960,9606.ENSP00000378323,9606.ENSP00000410402,9606.ENSP00000497527	AKAP13,RYR2,AGT,ADRA1A,PPP3CA,MAP2K4,INPP5F
GO:0003339	Regulation of mesenchymal to epithelial transition involved in metanephros morphogenesis	3	7	1.02	0.37	0.0352	9606.ENSP00000263334,9606.ENSP00000354394,9606.ENSP00000495360	PAX8,STAT1,CTNNB1
GO:0003340	Negative regulation of mesenchymal to epithelial transition involved in metanephros morphogenesis	2	2	1.38	0.35	0.0489	9606.ENSP00000354394,9606.ENSP00000495360	STAT1,CTNNB1
GO:0003366	Cell-matrix adhesion involved in ameboidal cell migration	2	2	1.46	0.36	0.0445	ITGB7,ITGA4
GO:0003366	Cell-matrix adhesion involved in ameboidal cell migration	2	2	1.38	0.35	0.0489	9606.ENSP00000267082,9606.ENSP00000380227	ITGB7,ITGA4
GO:0003376	sphingosine-1-phosphate receptor signaling pathway	4	15	0.89	0.4	0.0240	EZR,PIK3CG,AKT1,PIK3CB
GO:0003376	sphingosine-1-phosphate receptor signaling pathway	6	15	0.99	0.7	0.0012	9606.ENSP00000338934,9606.ENSP00000365006,9606.ENSP00000419260,9606.ENSP00000451828,9606.ENSP00000496438,9606.ENSP00000501150	EZR,S1PR3,PIK3CG,AKT1,S1PR2,PIK3CB
GO:0005513	Detection of calcium ion	8	14	1.22	1.26	5.60e-06	KCNMB4,KCNMB1,CALM3,KCNMB3,RYR2,KCNMB2,CALM1,CALM2
GO:0005513	Detection of calcium ion	9	14	1.19	1.35	1.86e-06	9606.ENSP00000258111,9606.ENSP00000274629,9606.ENSP00000291295,9606.ENSP00000319370,9606.ENSP00000355533,9606.ENSP00000368767,9606.ENSP00000407592,9606.ENSP00000499717,9606.ENSP00000499797	KCNMB4,KCNMB1,CALM3,KCNMB3,RYR2,ASPH,KCNMB2,CALM1,CALM2
GO:0005978	Glycogen biosynthetic process	6	21	0.84	0.56	0.0044	9606.ENSP00000261195,9606.ENSP00000317904,9606.ENSP00000375892,9606.ENSP00000397133,9606.ENSP00000451828,9606.ENSP00000482075	GYS2,GYS1,AKT2,PRKAG3,AKT1,PTGES3
GO:0005979	Regulation of glycogen biosynthetic process	7	28	0.78	0.58	0.0032	9606.ENSP00000222330,9606.ENSP00000303830,9606.ENSP00000304895,9606.ENSP00000324806,9606.ENSP00000365016,9606.ENSP00000375892,9606.ENSP00000451828	GSK3A,INSR,IRS1,GSK3B,IRS2,AKT2,AKT1
GO:0006110	Regulation of glycolytic process	13	47	0.91	1.23	1.31e-06	EP300,NCOR1,FLCN,PRKAG2,INSR,RPTOR,PRKAG1,PRKAA1,MTOR,PRKAA2,OGT,PPARA,MLST8
GO:0006110	Regulation of glycolytic process	16	47	0.92	1.47	4.37e-08	9606.ENSP00000263253,9606.ENSP00000264657,9606.ENSP00000268712,9606.ENSP00000284981,9606.ENSP00000287878,9606.ENSP00000303830,9606.ENSP00000307272,9606.ENSP00000323867,9606.ENSP00000326366,9606.ENSP00000346148,9606.ENSP00000354558,9606.ENSP00000360290,9606.ENSP00000362824,9606.ENSP00000385523,9606.ENSP00000437955,9606.ENSP00000457870	EP300,STAT3,NCOR1,APP,PRKAG2,INSR,RPTOR,PRKAG1,PSEN1,PRKAA1,MTOR,PRKAA2,OGT,PPARA,HIF1A,MLST8
GO:0006171	cAMP biosynthetic process	4	10	1.07	0.52	0.0084	ADCY8,ADCY9,ADCY1,ADCY3
GO:0006171	cAMP biosynthetic process	4	10	0.99	0.48	0.0122	9606.ENSP00000286355,9606.ENSP00000294016,9606.ENSP00000297323,9606.ENSP00000384484	ADCY8,ADCY9,ADCY1,ADCY3
GO:0006447	Regulation of translational initiation by iron	2	2	1.38	0.35	0.0489	9606.ENSP00000199389,9606.ENSP00000398698	EIF2AK1,TNF
GO:0006468	Protein phosphorylation	157	736	0.79	3.41	4.94e-68	MAPK13,MAPK12,MAPK1,AURKA,RIPK2,RPS6KB1,IL2,CCND1,MAPK14,FLT3,CDC25B,HCST,MKNK2,RARA,CSNK1G2,CCNB1,IRAK2,CAMK1,PDGFRA,RIPK1,TLR2,PDGFRB,PKMYT1,RPS6KA6,MAP2K2,MAPK3,EEF2K,PRKCQ,PRKCG,KDR,ATF2,TXK,PIKFYVE,PRKG2,FNIP2,ZAP70,CDK2,ERBB3,ERBB2,MYLK4,EGFR,PRKAG2,KIT,ARAF,FGFR4,BAX,PRKCI,LRRK2,PLK1,BIRC5,MAP2K1,BUB1,INSR,SIK2,PRKCE,RPS6KB2,PRKACA,PHKB,MET,ROCK2,PRKAG1,ULK1,TBK1,PRKCD,MAPK11,RPS6KA4,ATG10…
GO:0006468	Protein phosphorylation	172	736	0.75	3.23	8.71e-68	9606.ENSP00000199389,9606.ENSP00000211287,9606.ENSP00000215659,9606.ENSP00000215832,9606.ENSP00000220751,9606.ENSP00000221930,9606.ENSP00000222330,9606.ENSP00000225577,9606.ENSP00000226730,9606.ENSP00000227507,9606.ENSP00000229795,9606.ENSP00000241453,9606.ENSP00000245960,9606.ENSP00000246551,9606.ENSP00000250896,9606.ENSP00000254066,9606.ENSP00000255641,9606.ENSP00000256458,9606.ENSP00000256460,…	EIF2AK1,MAPK13,MAPK12,MAPK1,RIPK2,TGFB1,GSK3A,RPS6KB1,IL2,CCND1,MAPK14,FLT3,CDC25B,HCST,MKNK2,RARA,CSNK1G2,IRAK2,CAMK1,PDGFRA,CDK4,RIPK1,TLR2,PDGFRB,IL12RB2,RPS6KA6,MAP2K2,MAPK3,EEF2K,MAP3K8,PRKCQ,PRKCG,KDR,ATF2,TXK,PRKG2,ZAP70,CDK2,ERBB3,ERBB2,MYLK4,EGFR,CAMK4,FLT1,APP,PRKAG2,KIT,ARAF,BAX,PRKCI,COPS2,MAP2K1,INSR,SIK2,PRKCE,RPS6KB2,PRKACA,MOS,EDNRA,MET,ROCK2,PRKAG1,ULK1,GSK3B,TBK1,PRKCD,MAPK11,RP…
GO:0006525	Arginine metabolic process	4	17	0.76	0.33	0.0473	9606.ENSP00000297494,9606.ENSP00000307188,9606.ENSP00000327251,9606.ENSP00000477999	NOS3,ASL,NOS2,NOS1
GO:0006661	Phosphatidylinositol biosynthetic process	31	126	0.86	2.07	4.07e-14	INPP4A,PIK3R2,PI4KA,ITPKA,PIK3R3,PIK3CA,PIKFYVE,PI4K2B,PIP5K1B,PIK3C2A,INPPL1,PIP4K2C,PIK3C2B,PI4KB,PIP5K1A,PI4K2A,PTEN,PIP4K2A,PIK3CD,PIP5KL1,INPP5D,PIK3CG,INPP4B,PIK3R1,PIK3C2G,PIP5K1C,PIK3R6,PLCG2,PIP4K2B,INPP5F,PIK3CB
GO:0006801	Superoxide metabolic process	10	41	0.85	0.89	8.54e-05	CYBA,NOX4,NCF1,NOS3,NCF2,PREX1,NOX1,CYBB,NOX5,NCF4
GO:0006809	Nitric oxide biosynthetic process	5	21	0.84	0.46	0.0124	TICAM1,NOS3,TLR4,AKT1,NOS1
GO:0006809	Nitric oxide biosynthetic process	6	21	0.84	0.56	0.0044	9606.ENSP00000248244,9606.ENSP00000297494,9606.ENSP00000327251,9606.ENSP00000363089,9606.ENSP00000451828,9606.ENSP00000477999	TICAM1,NOS3,NOS2,TLR4,AKT1,NOS1
GO:0006939	Smooth muscle contraction	15	60	0.78	1.09	3.21e-06	9606.ENSP00000222271,9606.ENSP00000315011,9606.ENSP00000317985,9606.ENSP00000345731,9606.ENSP00000350310,9606.ENSP00000353452,9606.ENSP00000355627,9606.ENSP00000361965,9606.ENSP00000366416,9606.ENSP00000369960,9606.ENSP00000382697,9606.ENSP00000384763,9606.ENSP00000393333,9606.ENSP00000450482,9606.ENSP00000459962	COMP,EDNRA,ROCK2,DLG1,ATP2B4,MYLK,AGT,ADA,EDNRB,ADRA1A,ROCK1,SLC8A1,TBXA2R,BDKRB2,TRPV1
GO:0006941	Striated muscle contraction	27	109	0.86	1.92	2.17e-12	KCNQ1,RPS6KB1,PIK3CA,SLC9A1,KCNN2,CACNA1C,GJA1,CACNA1D,KCNJ3,SCN4B,SCN5A,HSP90AA1,TNNI3,MAP2K3,MTOR,CACNA1S,RYR2,MYLK2,KCNE1,NEDD4L,SLC8A1,SCN1B,CAMK2D,KCNJ5,MAP2K6,KCNE1B,NOS1
GO:0006941	Striated muscle contraction	29	109	0.81	1.82	3.97e-12	9606.ENSP00000155840,9606.ENSP00000225577,9606.ENSP00000263967,9606.ENSP00000263980,9606.ENSP00000264773,9606.ENSP00000266376,9606.ENSP00000288139,9606.ENSP00000295101,9606.ENSP00000311127,9606.ENSP00000322460,9606.ENSP00000328968,9606.ENSP00000335153,9606.ENSP00000345083,9606.ENSP00000352011,9606.ENSP00000354558,9606.ENSP00000355192,9606.ENSP00000355533,9606.ENSP00000357177,9606.ENSP00000365162,…	KCNQ1,RPS6KB1,PIK3CA,SLC9A1,KCNN2,CACNA1C,CACNA1D,KCNJ3,VEGFB,SCN4B,SCN5A,HSP90AA1,MAP2K3,CACNA1G,MTOR,CACNA1S,RYR2,ARHGEF11,MYLK2,KCNE1,SLC8A1,CXCR4,SCN1B,TNF,CAMK2D,KCNJ5,MAP2K6,KCNE1B,NOS1
GO:0006942	Regulation of striated muscle contraction	21	93	0.82	1.5	4.39e-09	KCNQ1,SLC9A1,CACNA1C,CALM3,PRKACA,SCN5A,HSP90AA1,TNNI3,DLG1,PLN,RYR2,SLC8A3,SLC8A1,ACE2,CTNNA3,PIK3CG,CAMK2D,NR4A1,NOS1,CALM1,CALM2
GO:0006942	Regulation of striated muscle contraction	22	93	0.76	1.37	1.69e-08	9606.ENSP00000155840,9606.ENSP00000263980,9606.ENSP00000266376,9606.ENSP00000291295,9606.ENSP00000306662,9606.ENSP00000309591,9606.ENSP00000328968,9606.ENSP00000335153,9606.ENSP00000345731,9606.ENSP00000350132,9606.ENSP00000355533,9606.ENSP00000368767,9606.ENSP00000369960,9606.ENSP00000370669,9606.ENSP00000384763,9606.ENSP00000389326,9606.ENSP00000419260,9606.ENSP00000425824,9606.ENSP00000440864,…	KCNQ1,SLC9A1,CACNA1C,CALM3,ADRA1B,PRKACA,SCN5A,HSP90AA1,DLG1,PLN,RYR2,ASPH,ADRA1A,SLC8A3,SLC8A1,ACE2,PIK3CG,CAMK2D,NR4A1,NOS1,CALM1,CALM2
GO:0006956	Complement activation	29	60	1.07	2.9	1.62e-17	9606.ENSP00000243611,9606.ENSP00000245907,9606.ENSP00000247153,9606.ENSP00000278407,9606.ENSP00000291744,9606.ENSP00000296280,9606.ENSP00000299367,9606.ENSP00000313875,9606.ENSP00000313967,9606.ENSP00000314299,9606.ENSP00000356024,9606.ENSP00000356399,9606.ENSP00000363079,9606.ENSP00000363770,9606.ENSP00000363773,9606.ENSP00000363869,9606.ENSP00000378131,9606.ENSP00000383690,9606.ENSP00000385035,…	C4BPB,C3,CFP,SERPING1,FCN2,MASP1,C2,CD46,C1QB,CFHR1,CR2,CFH,MBL2,C1QC,C1QA,VSIG4,CFI,MASP2,C1S,C4A,B4E1Z4_HUMAN,C4B,CFB,IGLL5,C1R,CFD,LOC102723407,IGHV3-72,IGHV3-43D
GO:0006957	Complement activation, alternative pathway	8	16	1.08	1.06	3.17e-05	9606.ENSP00000245907,9606.ENSP00000247153,9606.ENSP00000356024,9606.ENSP00000356399,9606.ENSP00000363869,9606.ENSP00000410815,9606.ENSP00000416561,9606.ENSP00000468253	C3,CFP,CR2,CFH,VSIG4,B4E1Z4_HUMAN,CFB,CFD
GO:0006958	Complement activation, classical pathway	20	40	1.08	2.28	2.27e-12	9606.ENSP00000243611,9606.ENSP00000245907,9606.ENSP00000278407,9606.ENSP00000299367,9606.ENSP00000313875,9606.ENSP00000313967,9606.ENSP00000356024,9606.ENSP00000363079,9606.ENSP00000363770,9606.ENSP00000363773,9606.ENSP00000378131,9606.ENSP00000383690,9606.ENSP00000385035,9606.ENSP00000396688,9606.ENSP00000415941,9606.ENSP00000431254,9606.ENSP00000444271,9606.ENSP00000478289,9606.ENSP00000480035,…	C4BPB,C3,SERPING1,C2,CD46,C1QB,CR2,MBL2,C1QC,C1QA,CFI,MASP2,C1S,C4A,C4B,IGLL5,C1R,LOC102723407,IGHV3-72,IGHV3-43D
GO:0006970	Response to osmotic stress	15	78	0.75	1.02	7.25e-06	MAPK13,SLC12A2,ATF2,TP53,BAX,ITGA2,RPTOR,HSP90AA1,PDPK1,MYLK,MTOR,ARHGEF2,PTK2B,MAP2K7,MLST8
GO:0006970	Response to osmotic stress	21	78	0.81	1.49	5.87e-09	9606.ENSP00000211287,9606.ENSP00000262461,9606.ENSP00000264110,9606.ENSP00000269305,9606.ENSP00000293288,9606.ENSP00000296585,9606.ENSP00000307272,9606.ENSP00000335153,9606.ENSP00000344220,9606.ENSP00000353452,9606.ENSP00000354558,9606.ENSP00000356094,9606.ENSP00000360609,9606.ENSP00000361275,9606.ENSP00000369647,9606.ENSP00000370571,9606.ENSP00000380638,9606.ENSP00000381070,9606.ENSP00000398698,…	MAPK13,SLC12A2,ATF2,TP53,BAX,ITGA2,RPTOR,HSP90AA1,PDPK1,MYLK,MTOR,AVPR1B,HSP90AB1,PLK3,AVP,TH,PTK2B,MAP2K7,TNF,BDKRB2,MLST8
GO:0006975	DNA damage induced protein phosphorylation	3	8	1.04	0.37	0.0357	MAPK12,MAPK3,MAP2K6
GO:0006975	DNA damage induced protein phosphorylation	3	8	0.96	0.34	0.0453	9606.ENSP00000215659,9606.ENSP00000263025,9606.ENSP00000468348	MAPK12,MAPK3,MAP2K6
GO:0006977	DNA damage response, signal transduction by p53 class mediator resulting in cell cycle arrest	5	20	0.78	0.43	0.0172	9606.ENSP00000228872,9606.ENSP00000258149,9606.ENSP00000269305,9606.ENSP00000361275,9606.ENSP00000384849	CDKN1B,MDM2,TP53,PLK3,CDKN1A
GO:0006983	ER overload response	5	12	1.0	0.61	0.0033	9606.ENSP00000269305,9606.ENSP00000324173,9606.ENSP00000324806,9606.ENSP00000376943,9606.ENSP00000448665	TP53,HSPA5,GSK3B,BCL2L11,DDIT3
GO:0007028	Cytoplasm organization	4	16	0.86	0.39	0.0284	KIF5B,FOSL1,SOS1,PADI6
GO:0007044	Cell-substrate junction assembly	10	39	0.87	0.93	6.01e-05	ITGB4,ITGA5,ITGA2,TLN1,FN1,PIP5K1A,SRC,ACTN1,PTK2B,ITGB3
GO:0007044	Cell-substrate junction assembly	12	39	0.87	1.09	7.76e-06	9606.ENSP00000200181,9606.ENSP00000258341,9606.ENSP00000293379,9606.ENSP00000296585,9606.ENSP00000316029,9606.ENSP00000346839,9606.ENSP00000357883,9606.ENSP00000362680,9606.ENSP00000377941,9606.ENSP00000380638,9606.ENSP00000381185,9606.ENSP00000452786	ITGB4,LAMC1,ITGA5,ITGA2,TLN1,FN1,PIP5K1A,SRC,ACTN1,PTK2B,BCL2,ITGB3
GO:0007057	Spindle assembly involved in female meiosis I	3	4	1.34	0.52	0.0102	AURKA,NDC80,CCNB2
GO:0007077	Mitotic nuclear membrane disassembly	3	7	1.1	0.4	0.0276	PLK1,PRKCA,PRKCB
GO:0007088	Regulation of mitotic nuclear division	26	118	0.81	1.69	5.61e-11	AURKA,DUSP1,DLGAP5,PIN1,CCNB1,NDC80,PDGFRB,ANAPC5,PKMYT1,RB1,NUF2,BUB1B,PLK1,BIRC5,BUB1,INSR,CDC25C,CD28,CDC16,CENPF,CDC20,CDC23,ANAPC7,FBXO43,CDC27,CDC42
GO:0007091	Metaphase/anaphase transition of mitotic cell cycle	7	8	1.41	1.34	4.17e-06	BUB1B,ANAPC2,ANAPC1,CDC16,CDC23,ANAPC7,CDC27
GO:0007094	Mitotic spindle assembly checkpoint signaling	8	31	0.88	0.77	0.00046	NDC80,NUF2,BUB1B,PLK1,BIRC5,BUB1,CENPF,CDC20
GO:0007096	Regulation of exit from mitosis	4	19	0.79	0.34	0.0446	CDKN1B,BIRC5,UBE2C,CDC23
GO:0007143	Female meiotic nuclear division	7	34	0.78	0.57	0.0037	AURKA,CDC25B,NDC80,CCNB2,PLK1,PPP2R1A,UBB
GO:0007144	Female meiosis I	5	13	1.05	0.64	0.0025	AURKA,CDC25B,NDC80,CCNB2,UBB
GO:0007159	Leukocyte cell-cell adhesion	11	56	0.76	0.81	0.00017	RAC2,ZAP70,ITGB7,ITGA5,EZR,ITGAL,SYK,ITGB1,ITGA4,ITGB2,ROCK1
GO:0007159	Leukocyte cell-cell adhesion	18	56	0.89	1.54	1.02e-08	9606.ENSP00000215637,9606.ENSP00000249071,9606.ENSP00000264972,9606.ENSP00000267082,9606.ENSP00000293379,9606.ENSP00000294728,9606.ENSP00000315477,9606.ENSP00000316228,9606.ENSP00000338934,9606.ENSP00000349252,9606.ENSP00000353408,9606.ENSP00000364898,9606.ENSP00000379350,9606.ENSP00000380227,9606.ENSP00000380948,9606.ENSP00000382697,9606.ENSP00000383376,9606.ENSP00000398698	MADCAM1,RAC2,ZAP70,ITGB7,ITGA5,VCAM1,CD209,CLEC4M,EZR,ITGAL,MSN,SYK,ITGB1,ITGA4,ITGB2,ROCK1,JAM2,TNF
GO:0007160	Cell-matrix adhesion	29	136	0.79	1.76	6.51e-12	ITGB4,VCL,ITGB8,ITGAV,ITGA2B,ITGB7,PXN,ITGB6,TIAM1,ITGA5,ITGB5,ITGA2,ITGA3,ITGA11,FN1,ITGAL,THBS3,PIP5K1A,ITGA10,SRC,ACTN1,ITGB1,ILK,ITGA4,PTK2B,ITGB2,RHOA,ITGB3,ITGAM
GO:0007160	Cell-matrix adhesion	41	136	0.86	2.47	1.22e-18	9606.ENSP00000200181,9606.ENSP00000215637,9606.ENSP00000222573,9606.ENSP00000226218,9606.ENSP00000239462,9606.ENSP00000261023,9606.ENSP00000262407,9606.ENSP00000264187,9606.ENSP00000264741,9606.ENSP00000267082,9606.ENSP00000282588,9606.ENSP00000283249,9606.ENSP00000293379,9606.ENSP00000294728,9606.ENSP00000296181,9606.ENSP00000296585,9606.ENSP00000298552,9606.ENSP00000315190,9606.ENSP00000327290,…	ITGB4,MADCAM1,ITGB8,VTN,TNN,ITGAV,ITGA2B,NID1,ITGA9,ITGB7,ITGA1,ITGB6,ITGA5,VCAM1,ITGB5,ITGA2,TSC1,ITGA3,ITGA11,FN1,ITGAL,THBS3,PIP5K1A,ITGA10,SRC,ITGA8,BCL2L11,ACTN1,ITGB1,ILK,ITGA4,PTK2B,ITGB2,BCL2,HPSE,PARVG,RHOA,TNXB,ITGB3,CTNNB1,ITGAM
GO:0007172	Signal complex assembly	4	8	1.16	0.59	0.0048	PXN,PTK2,SRC,PTK2B
GO:0007172	Signal complex assembly	3	8	0.96	0.34	0.0453	9606.ENSP00000341189,9606.ENSP00000362680,9606.ENSP00000380638	PTK2,SRC,PTK2B
GO:0007173	Epidermal growth factor receptor signaling pathway	21	49	1.1	2.43	2.40e-13	PLCG1,GAB1,PIK3CA,CBL,PIK3C2A,IQGAP1,ERBB2,EGFR,PTK2,ERBB4,PDPK1,PLCE1,SRC,SHC3,GRB2,PTK2B,SOS1,SHC1,BRAF,AKT1,PTPN11
GO:0007173	Epidermal growth factor receptor signaling pathway	18	49	0.95	1.7	1.85e-09	9606.ENSP00000221930,9606.ENSP00000244007,9606.ENSP00000262995,9606.ENSP00000263967,9606.ENSP00000264033,9606.ENSP00000268182,9606.ENSP00000269571,9606.ENSP00000275493,9606.ENSP00000341189,9606.ENSP00000342235,9606.ENSP00000344220,9606.ENSP00000362680,9606.ENSP00000364995,9606.ENSP00000380638,9606.ENSP00000401303,9606.ENSP00000419060,9606.ENSP00000451828,9606.ENSP00000489597	TGFB1,PLCG1,GAB1,PIK3CA,CBL,IQGAP1,ERBB2,EGFR,PTK2,ERBB4,PDPK1,SRC,SHC3,PTK2B,SHC1,BRAF,AKT1,PTPN11
GO:0007199	G protein-coupled receptor signaling pathway coupled to cGMP nucleotide second messenger	2	2	1.38	0.35	0.0489	9606.ENSP00000355627,9606.ENSP00000360973	AGT,AGTR2
GO:0007202	Activation of phospholipase C activity	11	30	0.95	1.15	5.67e-06	9606.ENSP00000264316,9606.ENSP00000275493,9606.ENSP00000286548,9606.ENSP00000299178,9606.ENSP00000315011,9606.ENSP00000355627,9606.ENSP00000356094,9606.ENSP00000363553,9606.ENSP00000369960,9606.ENSP00000398655,9606.ENSP00000443256	TXK,EGFR,GNAQ,AVPR1A,EDNRA,AGT,AVPR1B,LPAR1,ADRA1A,ITK,LPAR2
GO:0007229	Integrin-mediated signaling pathway	32	100	0.97	2.62	2.87e-17	ITGB4,ITGB8,ITFG2,ITGAV,ITGA2B,TXK,ITGB7,ITGB6,ITGA5,ITGB5,ITGA2,CTNNA1,ITGA3,TLN1,ITGA11,PTK2,FN1,ITGAL,ITGA10,VAV3,SRC,SYK,ITGB1,ILK,ITGA4,PTK2B,ITGB2,ITGB3,VAV1,PTPN11,ITGAM,CDC42
GO:0007229	Integrin-mediated signaling pathway	38	100	0.96	2.87	4.73e-20	9606.ENSP00000200181,9606.ENSP00000215637,9606.ENSP00000222573,9606.ENSP00000261023,9606.ENSP00000262407,9606.ENSP00000264316,9606.ENSP00000264741,9606.ENSP00000267082,9606.ENSP00000282588,9606.ENSP00000283249,9606.ENSP00000293379,9606.ENSP00000296181,9606.ENSP00000296585,9606.ENSP00000315190,9606.ENSP00000316029,9606.ENSP00000327290,9606.ENSP00000341189,9606.ENSP00000346839,9606.ENSP00000349252,…	ITGB4,MADCAM1,ITGB8,ITGAV,ITGA2B,TXK,ITGA9,ITGB7,ITGA1,ITGB6,ITGA5,ITGB5,ITGA2,ITGA3,TLN1,ITGA11,PTK2,FN1,ITGAL,CD47,ITGA10,VAV3,SRC,FGR,SYK,HCK,ITGA8,ITGB1,ILK,ITGA4,PTK2B,ITGB2,PRKD1,ITGB3,VAV1,PTPN11,ITGAM,CDC42
GO:0007249	I-kappaB kinase/NF-kappaB signaling	24	68	1.01	2.34	9.49e-14	NFKBIA,RIPK2,TICAM1,IRAK2,TLR2,ROCK2,TBK1,FYN,TLR9,MAP3K7,CHUK,CARD9,TLR4,TIRAP,ROCK1,RELA,IKBKB,TRAF6,AKT1,MAP3K14,BTK,IKBKG,BCL10,MYD88
GO:0007249	I-kappaB kinase/NF-kappaB signaling	30	68	1.03	2.78	2.86e-17	9606.ENSP00000216797,9606.ENSP00000220751,9606.ENSP00000248244,9606.ENSP00000256458,9606.ENSP00000260010,9606.ENSP00000315011,9606.ENSP00000317985,9606.ENSP00000329967,9606.ENSP00000346671,9606.ENSP00000353874,9606.ENSP00000358335,9606.ENSP00000359424,9606.ENSP00000360797,9606.ENSP00000363089,9606.ENSP00000366416,9606.ENSP00000376445,9606.ENSP00000382697,9606.ENSP00000384273,9606.ENSP00000398698,…	NFKBIA,RIPK2,TICAM1,IRAK2,TLR2,EDNRA,ROCK2,TBK1,FYN,TLR9,MAP3K7,CHUK,CARD9,TLR4,EDNRB,TIRAP,ROCK1,RELA,TNF,IKBKB,TRAF6,AKT1,IKBKE,MAP3K14,BTK,IKBKG,CTNNB1,AVPR2,BCL10,MYD88
GO:0007250	Activation of NF-kappaB-inducing kinase activity	7	18	1.05	0.89	0.00018	TRAF2,MAP3K7,IRAK1,TIRAP,TLR6,TRAF6,MALT1
GO:0007250	Activation of NF-kappaB-inducing kinase activity	8	18	1.03	0.99	5.98e-05	9606.ENSP00000247668,9606.ENSP00000346340,9606.ENSP00000358335,9606.ENSP00000358997,9606.ENSP00000376445,9606.ENSP00000389600,9606.ENSP00000433623,9606.ENSP00000497997	TRAF2,COPS8,MAP3K7,IRAK1,TIRAP,TLR6,TRAF6,MALT1
GO:0007252	I-kappaB phosphorylation	6	12	1.16	0.89	0.00024	TLR2,TLR9,MAP3K7,CHUK,TLR4,IKBKB
GO:0007252	I-kappaB phosphorylation	7	12	1.15	1.02	6.08e-05	9606.ENSP00000260010,9606.ENSP00000353874,9606.ENSP00000358335,9606.ENSP00000359424,9606.ENSP00000363089,9606.ENSP00000430684,9606.ENSP00000464030	TLR2,TLR9,MAP3K7,CHUK,TLR4,IKBKB,IKBKE
GO:0007254	JNK cascade	21	57	1.03	2.19	2.38e-12	RIPK2,NFKB1,ARHGEF6,ATF2,DAXX,LRRK2,SMAD3,DUSP9,CRKL,MAP3K5,MAP3K7,IRAK1,CARD9,NOX1,TLR4,MAPK8,MAP2K7,MAPK9,MAP2K4,IRAK4,MYD88
GO:0007254	JNK cascade	21	57	0.95	1.91	5.34e-11	9606.ENSP00000220751,9606.ENSP00000226574,9606.ENSP00000264110,9606.ENSP00000266000,9606.ENSP00000332973,9606.ENSP00000345853,9606.ENSP00000346300,9606.ENSP00000348089,9606.ENSP00000351908,9606.ENSP00000358335,9606.ENSP00000358997,9606.ENSP00000360797,9606.ENSP00000363089,9606.ENSP00000376167,9606.ENSP00000378974,9606.ENSP00000381070,9606.ENSP00000394560,9606.ENSP00000398698,9606.ENSP00000410402,…	RIPK2,NFKB1,ATF2,DAXX,SMAD3,DUSP9,CRKL,ERCC6,MAP3K5,MAP3K7,IRAK1,CARD9,TLR4,GPS1,MAPK8,MAP2K7,MAPK9,TNF,MAP2K4,IRAK4,MYD88
GO:0007260	Tyrosine phosphorylation of STAT protein	4	13	0.95	0.45	0.0164	IL2,JAK2,JAK3,JAK1
GO:0007260	Tyrosine phosphorylation of STAT protein	4	13	0.87	0.4	0.0237	9606.ENSP00000226730,9606.ENSP00000371067,9606.ENSP00000432511,9606.ENSP00000499900	IL2,JAK2,JAK3,JAK1
GO:0007263	Nitric oxide mediated signal transduction	7	21	0.91	0.72	0.00082	9606.ENSP00000252486,9606.ENSP00000297494,9606.ENSP00000327251,9606.ENSP00000355627,9606.ENSP00000360973,9606.ENSP00000370421,9606.ENSP00000477999	APOE,NOS3,NOS2,AGT,AGTR2,PDX1,NOS1
GO:0007264	Small GTPase mediated signal transduction	57	273	0.78	2.44	5.47e-23	NGFR,SOS2,ARHGDIG,ARHGDIB,RRAS,RAC2,RAP1B,KRAS,RRAS2,RHEB,FARP2,RAPGEF2,RASGRF2,CDK2,RB1,TP53,TIAM1,MRAS,RGL1,RAC3,RASGRP1,ITGA3,ROCK2,RASGRP2,RAPGEF5,CRKL,RASSF1,SHOC2,NRAS,RAP1A,VAV3,JUN,DAB1,PLCE1,VAV2,RALGDS,RRAGC,RALBP1,GRB2,RAPGEF4,ARHGEF12,ROCK1,SOS1,RASGRP3,RAPGEF3,RHOA,BRAP,RACGAP1,RASGRF1,HRAS,CDKN2A,RGL2,MAPKAPK5,VAV1,RASGRP4,CCNA2,CDC42
GO:0007265	Ras protein signal transduction	49	194	0.87	2.71	1.00e-22	NGFR,SOS2,ARHGDIG,ARHGDIB,RRAS,RAC2,RAP1B,KRAS,RRAS2,FARP2,RAPGEF2,RASGRF2,CDK2,RB1,TP53,TIAM1,MRAS,RGL1,RASGRP1,ITGA3,ROCK2,RASGRP2,RAPGEF5,CRKL,RASSF1,SHOC2,NRAS,RAP1A,JUN,PLCE1,RALGDS,GRB2,RAPGEF4,ARHGEF12,ROCK1,SOS1,RASGRP3,RAPGEF3,RHOA,BRAP,RACGAP1,RASGRF1,HRAS,CDKN2A,RGL2,MAPKAPK5,RASGRP4,CCNA2,CDC42
GO:0007266	Rho protein signal transduction	17	65	0.8	1.25	3.34e-07	9606.ENSP00000172229,9606.ENSP00000219409,9606.ENSP00000228945,9606.ENSP00000275364,9606.ENSP00000280155,9606.ENSP00000315190,9606.ENSP00000317985,9606.ENSP00000337261,9606.ENSP00000357177,9606.ENSP00000371897,9606.ENSP00000380942,9606.ENSP00000382697,9606.ENSP00000398832,9606.ENSP00000400175,9606.ENSP00000400717,9606.ENSP00000463939,9606.ENSP00000497733	NGFR,ARHGDIG,ARHGDIB,GNA12,ADRA2A,ITGA3,ROCK2,ARHGEF1,ARHGEF11,ARHGAP5,ARHGEF12,ROCK1,AGTR1,RHOA,GNA13,ARHGDIA,CDC42
GO:0007596	Blood coagulation	40	173	0.75	1.93	6.79e-15	9606.ENSP00000218099,9606.ENSP00000222271,9606.ENSP00000229795,9606.ENSP00000233156,9606.ENSP00000234071,9606.ENSP00000243611,9606.ENSP00000248076,9606.ENSP00000257290,9606.ENSP00000261405,9606.ENSP00000263967,9606.ENSP00000275364,9606.ENSP00000278407,9606.ENSP00000280155,9606.ENSP00000286548,9606.ENSP00000296585,9606.ENSP00000308541,9606.ENSP00000316029,9606.ENSP00000321326,9606.ENSP00000346839,…	F9,COMP,MAPK14,TFPI,PROC,C4BPB,F2RL3,PDGFRA,VWF,PIK3CA,GNA12,SERPING1,ADRA2A,GNAQ,ITGA2,F2,TLN1,F2R,FN1,SERPINC1,F5,VAV3,VAV2,SRC,F10,F7,SYK,ILK,F11,ADRA2C,PTPN6,GNA13,PIK3CG,ITGB3,ACTG1,VAV1,ADRA2B,PLCG2,ACTB,PIK3CB
GO:0007599	Hemostasis	41	178	0.75	1.94	3.26e-15	9606.ENSP00000218099,9606.ENSP00000222271,9606.ENSP00000229795,9606.ENSP00000233156,9606.ENSP00000234071,9606.ENSP00000243611,9606.ENSP00000248076,9606.ENSP00000257290,9606.ENSP00000261405,9606.ENSP00000263967,9606.ENSP00000275364,9606.ENSP00000278407,9606.ENSP00000280155,9606.ENSP00000286548,9606.ENSP00000296585,9606.ENSP00000308541,9606.ENSP00000316029,9606.ENSP00000321326,9606.ENSP00000346839,…	F9,COMP,MAPK14,TFPI,PROC,C4BPB,F2RL3,PDGFRA,VWF,PIK3CA,GNA12,SERPING1,ADRA2A,GNAQ,ITGA2,F2,TLN1,F2R,FN1,SERPINC1,F5,VAV3,VAV2,SRC,F10,F7,SYK,ILK,F11,ADRA2C,PTPN6,GNA13,PIK3CG,ITGB3,ACTG1,VAV1,ADRA2B,PLCG2,ACTB,AVPR2,PIK3CB
GO:0007616	Long-term memory	10	36	0.83	0.86	0.00012	9606.ENSP00000225577,9606.ENSP00000252486,9606.ENSP00000261254,9606.ENSP00000282356,9606.ENSP00000286355,9606.ENSP00000297323,9606.ENSP00000356832,9606.ENSP00000367830,9606.ENSP00000386229,9606.ENSP00000405963	RPS6KB1,APOE,CCND2,CAMK4,ADCY8,ADCY1,SGK1,PRKCZ,RGS14,RASGRF1
GO:0007617	Mating behavior	9	33	0.82	0.78	0.00034	9606.ENSP00000254079,9606.ENSP00000264637,9606.ENSP00000284981,9606.ENSP00000299178,9606.ENSP00000361021,9606.ENSP00000361965,9606.ENSP00000369647,9606.ENSP00000370571,9606.ENSP00000379904	PPP1R1B,THRA,APP,AVPR1A,PTEN,ADA,AVP,TH,THRB
GO:0007621	Negative regulation of female receptivity	4	4	1.38	0.73	0.0014	9606.ENSP00000254079,9606.ENSP00000299178,9606.ENSP00000369647,9606.ENSP00000379904	PPP1R1B,AVPR1A,AVP,THRB
GO:0007622	Rhythmic behavior	6	26	0.83	0.54	0.0055	KCNQ1,NCOR1,TP53,PTEN,CSNK1E,NCOA2
GO:0007622	Rhythmic behavior	7	26	0.81	0.61	0.0023	9606.ENSP00000155840,9606.ENSP00000268712,9606.ENSP00000269305,9606.ENSP00000361021,9606.ENSP00000370571,9606.ENSP00000380044,9606.ENSP00000399968	KCNQ1,NCOR1,TP53,PTEN,TH,CSNK1E,NCOA2
GO:0007635	Chemosensory behavior	4	18	0.81	0.35	0.0390	PRKCG,ADCY3,NTRK1,TRPV1
GO:0008016	Regulation of heart contraction	42	201	0.78	2.12	6.71e-17	KCNQ1,IL2,SLC8A2,MDM2,SLC9A1,THRA,KCNN2,CACNA1C,GJA1,CACNA1D,CALM3,KCNJ3,NOS3,PRKACA,SCN4B,SCN5A,HSP90AA1,TNNI3,DLG1,PLN,ATP2B4,RYR2,AGT,ADA,SLC8A3,JAK2,THRB,KCNE1,SLC8A1,ACE2,CTNNA3,ATP2B1,SCN1B,PIK3CG,CAMK2D,KCNJ5,TRPV1,KCNE1B,NOS1,FXYD1,CALM1,CALM2
GO:0008016	Regulation of heart contraction	51	201	0.79	2.37	2.03e-20	9606.ENSP00000155840,9606.ENSP00000222330,9606.ENSP00000226730,9606.ENSP00000236877,9606.ENSP00000258149,9606.ENSP00000263980,9606.ENSP00000264637,9606.ENSP00000264773,9606.ENSP00000266376,9606.ENSP00000288139,9606.ENSP00000291295,9606.ENSP00000295101,9606.ENSP00000297494,9606.ENSP00000299178,9606.ENSP00000306662,9606.ENSP00000309591,9606.ENSP00000315011,9606.ENSP00000322460,9606.ENSP00000328968,…	KCNQ1,GSK3A,IL2,SLC8A2,MDM2,SLC9A1,THRA,KCNN2,CACNA1C,CACNA1D,CALM3,KCNJ3,NOS3,AVPR1A,ADRA1B,PRKACA,EDNRA,SCN4B,SCN5A,CACNA1H,HSP90AA1,DLG1,PLN,ATP2B4,CACNA1G,RYR2,AGT,AGTR2,ADA,EDNRB,ADRA1D,ASPH,ADRA1A,TH,SLC8A3,JAK2,THRB,KCNE1,SLC8A1,ACE2,SCN1B,TNF,PIK3CG,CAMK2D,KCNJ5,TRPV1,KCNE1B,NOS1,FXYD1,CALM1,CALM2
GO:0008050	Female courtship behavior	2	2	1.46	0.36	0.0445	THRA,THRB
GO:0008050	Female courtship behavior	2	2	1.38	0.35	0.0489	9606.ENSP00000264637,9606.ENSP00000379904	THRA,THRB
GO:0008228	Opsonization	4	9	1.03	0.51	0.0093	9606.ENSP00000245907,9606.ENSP00000291744,9606.ENSP00000363079,9606.ENSP00000415941	C3,FCN2,MBL2,C4B
GO:0008286	Insulin receptor signaling pathway	18	64	0.91	1.6	4.40e-09	PIK3R2,PIK3R3,GAB1,PIK3CA,PIK3C2A,INSR,IRS1,IRS4,EIF4EBP2,FOXO4,IRS2,FOXO1,AKT2,GRB2,SHC1,PIK3R1,AKT1,IGF1R
GO:0008286	Insulin receptor signaling pathway	20	64	0.88	1.63	1.81e-09	9606.ENSP00000222254,9606.ENSP00000222330,9606.ENSP00000257430,9606.ENSP00000262741,9606.ENSP00000262995,9606.ENSP00000263967,9606.ENSP00000303830,9606.ENSP00000304895,9606.ENSP00000311857,9606.ENSP00000324806,9606.ENSP00000361202,9606.ENSP00000362314,9606.ENSP00000363377,9606.ENSP00000365016,9606.ENSP00000368880,9606.ENSP00000375892,9606.ENSP00000401303,9606.ENSP00000428056,9606.ENSP00000451828,…	PIK3R2,GSK3A,APC,PIK3R3,GAB1,PIK3CA,INSR,IRS1,PTPN2,GSK3B,IRS4,EIF4EBP2,FOXO4,IRS2,FOXO1,AKT2,SHC1,PIK3R1,AKT1,IGF1R
GO:0008315	G2/MI transition of meiotic cell cycle	2	2	1.46	0.36	0.0445	NDC80,CCNB2
GO:0008608	Attachment of spindle microtubules to kinetochore	7	26	0.89	0.7	0.0010	NDC80,CENPE,RB1,NUF2,EML4,KIF2C,SEH1L
GO:0008625	Extrinsic apoptotic signaling pathway via death domain receptors	12	43	0.83	1.01	1.74e-05	9606.ENSP00000162749,9606.ENSP00000266000,9606.ENSP00000293288,9606.ENSP00000318822,9606.ENSP00000341268,9606.ENSP00000361892,9606.ENSP00000378040,9606.ENSP00000381185,9606.ENSP00000386135,9606.ENSP00000398698,9606.ENSP00000401888,9606.ENSP00000428056	TNFRSF1A,DAXX,BAX,BID,TRADD,STK4,BAD,BCL2,DAPK1,TNF,RAF1,PIK3R1
GO:0008630	Intrinsic apoptotic signaling pathway in response to DNA damage	18	75	0.76	1.21	3.96e-07	9606.ENSP00000162749,9606.ENSP00000263253,9606.ENSP00000269305,9606.ENSP00000293288,9606.ENSP00000330237,9606.ENSP00000340989,9606.ENSP00000348089,9606.ENSP00000363591,9606.ENSP00000365230,9606.ENSP00000367545,9606.ENSP00000376943,9606.ENSP00000378040,9606.ENSP00000381185,9606.ENSP00000384849,9606.ENSP00000398698,9606.ENSP00000418960,9606.ENSP00000428056,9606.ENSP00000464030	TNFRSF1A,EP300,TP53,BAX,CASP9,SFN,ERCC6,BAK1,BCL2L1,TP73,BCL2L11,BAD,BCL2,CDKN1A,TNF,BRCA1,PIK3R1,IKBKE
GO:0008635	Activation of cysteine-type endopeptidase activity involved in apoptotic process by cytochrome c	3	8	0.96	0.34	0.0453	9606.ENSP00000293288,9606.ENSP00000330237,9606.ENSP00000363591	BAX,CASP9,BAK1
GO:0008637	Apoptotic mitochondrial changes	13	58	0.82	1.04	9.33e-06	PPP2CB,ATF2,TP53,BAX,BID,HSPD1,SFN,ERBB4,BCL2L1,BAD,CDKN2A,AKT1,CAMK2A
GO:0008637	Apoptotic mitochondrial changes	18	58	0.88	1.5	1.58e-08	9606.ENSP00000216115,9606.ENSP00000221138,9606.ENSP00000264110,9606.ENSP00000269305,9606.ENSP00000293288,9606.ENSP00000318822,9606.ENSP00000340019,9606.ENSP00000340989,9606.ENSP00000342235,9606.ENSP00000357804,9606.ENSP00000363591,9606.ENSP00000365230,9606.ENSP00000376943,9606.ENSP00000378040,9606.ENSP00000381185,9606.ENSP00000418915,9606.ENSP00000451828,9606.ENSP00000500386	BIK,PPP2CB,ATF2,TP53,BAX,BID,HSPD1,SFN,ERBB4,THEM4,BAK1,BCL2L1,BCL2L11,BAD,BCL2,CDKN2A,AKT1,CAMK2A
GO:0009267	Cellular response to starvation	41	169	0.85	2.39	1.86e-18	MAPK1,ITFG2,NPRL2,SESN2,WDR59,RRAGB,MAPK3,ATF2,TP53,FLCN,PRKAG2,WDR24,LRRK2,SIK2,RPTOR,C12orf66,RNF152,PRKAG1,ATF4,KPTN,FOXO3,MIOS,PRKAA1,MAX,TFEB,MAP3K5,MTOR,PIK3C2B,RRAGD,PRKAA2,RRAGC,FOXO1,RRAGA,MAPK8,SEH1L,PPARA,PRKAG3,FNIP1,SZT2,NPRL3,DEPDC5
GO:0009299	mRNA transcription	12	50	0.84	1.03	1.34e-05	RARA,ATF2,THRA,TP53,PPARG,MED1,ATF4,THRB,NCOA1,CREB1,NCOA2,RXRA
GO:0009299	mRNA transcription	13	50	0.8	1.01	1.28e-05	9606.ENSP00000254066,9606.ENSP00000264110,9606.ENSP00000264637,9606.ENSP00000264657,9606.ENSP00000269305,9606.ENSP00000287820,9606.ENSP00000300651,9606.ENSP00000336790,9606.ENSP00000379904,9606.ENSP00000385216,9606.ENSP00000387699,9606.ENSP00000399968,9606.ENSP00000419692	RARA,ATF2,THRA,STAT3,TP53,PPARG,MED1,ATF4,THRB,NCOA1,CREB1,NCOA2,RXRA
GO:0009395	Phospholipid catabolic process	14	47	0.86	1.2	1.40e-06	9606.ENSP00000219345,9606.ENSP00000244007,9606.ENSP00000274793,9606.ENSP00000290472,9606.ENSP00000330442,9606.ENSP00000368305,9606.ENSP00000380442,9606.ENSP00000382434,9606.ENSP00000384610,9606.ENSP00000396045,9606.ENSP00000407509,9606.ENSP00000472546,9606.ENSP00000482457,9606.ENSP00000497527	PLA2G15,PLCG1,PLA2G7,PLA2G4D,PLB1,GPCPD1,PLA2G4F,PLA2G4E,PNPLA7,PLA2G4B,PNPLA6,PLA2G4C,PLCG2,INPP5F
GO:0009409	Response to cold	11	53	0.78	0.85	0.00011	NFKBIA,SLC9A1,THRA,PPARG,FOS,PRKACA,HSP90AA1,HSPD1,PRKAA1,FOXO1,ATP2B1
GO:0009414	Response to water deprivation	3	8	0.96	0.34	0.0453	9606.ENSP00000264110,9606.ENSP00000299178,9606.ENSP00000370571	ATF2,AVPR1A,TH
GO:0009415	Response to water	4	14	0.92	0.42	0.0200	PIK3CA,ATF2,ATP2B4,NTRK1
GO:0009415	Response to water	6	14	1.02	0.74	0.00088	9606.ENSP00000263967,9606.ENSP00000264110,9606.ENSP00000299178,9606.ENSP00000350310,9606.ENSP00000370571,9606.ENSP00000431418	PIK3CA,ATF2,AVPR1A,ATP2B4,TH,NTRK1
GO:0009612	Response to mechanical stimulus	43	214	0.77	2.07	9.00e-17	KCNQ1,NFKBIA,RPS6KB1,NFKB1,MAPK14,FOSB,JUND,CYBA,MAPK3,PIK3CA,SLC9A1,PPARG,KIT,CAPN2,ITGA2,FOS,FOSL1,PTK2,FYN,RYR2,AGT,GADD45A,JUN,SRC,TLR4,BAD,MAPK8,PTK2B,MAP3K1,RELA,SLC8A1,KCNK2,RHOA,RAF1,MAP2K4,NTRK1,ITGB3,ACTG1,MAP3K14,TLR5,IGF1R,BCL10,MYD88
GO:0009612	Response to mechanical stimulus	51	214	0.76	2.23	2.02e-19	9606.ENSP00000155840,9606.ENSP00000162749,9606.ENSP00000216629,9606.ENSP00000216797,9606.ENSP00000221930,9606.ENSP00000225577,9606.ENSP00000226574,9606.ENSP00000229795,9606.ENSP00000245919,9606.ENSP00000252818,9606.ENSP00000260356,9606.ENSP00000261623,9606.ENSP00000263025,9606.ENSP00000263967,9606.ENSP00000263980,9606.ENSP00000287820,9606.ENSP00000288135,9606.ENSP00000296585,9606.ENSP00000306245,…	KCNQ1,TNFRSF1A,BDKRB1,NFKBIA,TGFB1,RPS6KB1,NFKB1,MAPK14,FOSB,JUND,THBS1,CYBA,MAPK3,PIK3CA,SLC9A1,PPARG,KIT,ITGA2,FOS,FOSL1,PTK2,FYN,STAT1,RYR2,AGT,JUN,SRC,TLR4,BAK1,BAD,MAPK8,PTK2B,MAP3K1,RELA,SLC8A1,CXCR4,KCNK2,TNF,RHOA,RAF1,MAP2K4,NTRK1,CITED2,ITGB3,ACTG1,MAP3K14,CTNNB1,TLR5,IGF1R,BCL10,MYD88
GO:0009651	Response to salt stress	10	24	1.0	1.15	7.35e-06	9606.ENSP00000269305,9606.ENSP00000293288,9606.ENSP00000335153,9606.ENSP00000356094,9606.ENSP00000360609,9606.ENSP00000369647,9606.ENSP00000370571,9606.ENSP00000380638,9606.ENSP00000398698,9606.ENSP00000450482	TP53,BAX,HSP90AA1,AVPR1B,HSP90AB1,AVP,TH,PTK2B,TNF,BDKRB2
GO:0010224	Response to UV-B	7	17	1.0	0.83	0.00031	9606.ENSP00000231228,9606.ENSP00000303231,9606.ENSP00000348089,9606.ENSP00000381185,9606.ENSP00000384273,9606.ENSP00000384849,9606.ENSP00000418525	IL12B,IL12A,ERCC6,BCL2,RELA,CDKN1A,MME
GO:0010259	Multicellular organism aging	10	25	0.99	1.12	9.72e-06	9606.ENSP00000078429,9606.ENSP00000222271,9606.ENSP00000275364,9606.ENSP00000299178,9606.ENSP00000315011,9606.ENSP00000356094,9606.ENSP00000362690,9606.ENSP00000369960,9606.ENSP00000370571,9606.ENSP00000400717	GNA11,COMP,GNA12,AVPR1A,EDNRA,AVPR1B,NR5A1,ADRA1A,TH,GNA13
GO:0010332	Response to gamma radiation	14	55	0.79	1.05	6.41e-06	9606.ENSP00000258149,9606.ENSP00000261623,9606.ENSP00000264033,9606.ENSP00000269305,9606.ENSP00000293288,9606.ENSP00000324173,9606.ENSP00000346148,9606.ENSP00000348089,9606.ENSP00000363591,9606.ENSP00000365230,9606.ENSP00000366182,9606.ENSP00000381185,9606.ENSP00000384849,9606.ENSP00000407586	MDM2,CYBA,CBL,TP53,BAX,HSPA5,PRKAA1,ERCC6,BAK1,BCL2L1,ELK1,BCL2,CDKN1A,HRAS
GO:0010459	Negative regulation of heart rate	5	11	1.04	0.64	0.0025	9606.ENSP00000350132,9606.ENSP00000360973,9606.ENSP00000369960,9606.ENSP00000398698,9606.ENSP00000459962	PLN,AGTR2,ADRA1A,TNF,TRPV1
GO:0010460	Positive regulation of heart rate	7	26	0.81	0.61	0.0023	9606.ENSP00000155840,9606.ENSP00000299178,9606.ENSP00000306662,9606.ENSP00000355533,9606.ENSP00000361965,9606.ENSP00000368766,9606.ENSP00000369960	KCNQ1,AVPR1A,ADRA1B,RYR2,ADA,ADRA1D,ADRA1A
GO:0010508	Positive regulation of autophagy	34	146	0.83	2.09	7.07e-15	DCN,RIPK2,NPRL2,TICAM1,SESN2,MAPK3,KDR,PIK3C2A,FLCN,WDR24,LRRK2,RNF152,ULK1,TBK1,ATG101,FOXO3,PRKAA1,PIP4K2C,TFEB,TLR9,MAP3K7,GNAI3,PRKAA2,PIP4K2A,FOXO1,BAD,ULK2,ROCK1,DAPK1,PIP4K2B,NPRL3,IKBKG,DEPDC5,PIK3CB
GO:0010508	Positive regulation of autophagy	35	146	0.76	1.85	1.95e-13	9606.ENSP00000052754,9606.ENSP00000219476,9606.ENSP00000220751,9606.ENSP00000222330,9606.ENSP00000248244,9606.ENSP00000263025,9606.ENSP00000263923,9606.ENSP00000298552,9606.ENSP00000324560,9606.ENSP00000324806,9606.ENSP00000329967,9606.ENSP00000338990,9606.ENSP00000339527,9606.ENSP00000346148,9606.ENSP00000347032,9606.ENSP00000353874,9606.ENSP00000355865,9606.ENSP00000358335,9606.ENSP00000358867,…	DCN,TSC2,RIPK2,GSK3A,TICAM1,MAPK3,KDR,TSC1,ULK1,GSK3B,TBK1,ATG101,FOXO3,PRKAA1,PIP4K2C,TLR9,PRKN,MAP3K7,GNAI3,PRKAA2,PLK3,PIP4K2A,FOXO1,BCL2L11,BAD,ULK2,ROCK1,HPSE,DAPK1,PRKD1,AMBRA1,HIF1A,PIP4K2B,IKBKG,PIK3CB
GO:0010517	Regulation of phospholipase activity	25	66	0.96	2.2	3.06e-13	9606.ENSP00000243077,9606.ENSP00000257290,9606.ENSP00000261799,9606.ENSP00000264316,9606.ENSP00000275493,9606.ENSP00000282397,9606.ENSP00000286548,9606.ENSP00000288135,9606.ENSP00000299178,9606.ENSP00000315011,9606.ENSP00000344220,9606.ENSP00000355627,9606.ENSP00000356094,9606.ENSP00000363553,9606.ENSP00000367830,9606.ENSP00000369960,9606.ENSP00000393312,9606.ENSP00000398655,9606.ENSP00000398832,…	LRP1,PDGFRA,PDGFRB,TXK,EGFR,FLT1,GNAQ,KIT,AVPR1A,EDNRA,PDPK1,AGT,AVPR1B,LPAR1,PRKCZ,ADRA1A,FGFR1,ITK,AGTR1,GNA13,ESR1,HRAS,LPAR2,APOC2,SNCA
GO:0010518	Positive regulation of phospholipase activity	15	55	0.9	1.36	1.76e-07	PDGFRA,PDGFRB,TXK,EGFR,KIT,FGFR3,PDPK1,AGT,PRKCZ,FGFR1,ITK,ESR1,HRAS,FGFR2,RASGRP4
GO:0010518	Positive regulation of phospholipase activity	23	55	1.01	2.24	6.45e-13	9606.ENSP00000257290,9606.ENSP00000261799,9606.ENSP00000264316,9606.ENSP00000275493,9606.ENSP00000282397,9606.ENSP00000286548,9606.ENSP00000288135,9606.ENSP00000299178,9606.ENSP00000315011,9606.ENSP00000344220,9606.ENSP00000355627,9606.ENSP00000356094,9606.ENSP00000363553,9606.ENSP00000367830,9606.ENSP00000369960,9606.ENSP00000393312,9606.ENSP00000398655,9606.ENSP00000398832,9606.ENSP00000400717,…	PDGFRA,PDGFRB,TXK,EGFR,FLT1,GNAQ,KIT,AVPR1A,EDNRA,PDPK1,AGT,AVPR1B,LPAR1,PRKCZ,ADRA1A,FGFR1,ITK,AGTR1,GNA13,ESR1,HRAS,LPAR2,APOC2
GO:0010522	Regulation of calcium ion transport into cytosol	6	20	0.86	0.58	0.0036	9606.ENSP00000293288,9606.ENSP00000360608,9606.ENSP00000363591,9606.ENSP00000368767,9606.ENSP00000381185,9606.ENSP00000477999	BAX,GRIN1,BAK1,ASPH,BCL2,NOS1
GO:0010524	Positive regulation of calcium ion transport into cytosol	4	14	0.84	0.38	0.0287	9606.ENSP00000293288,9606.ENSP00000360608,9606.ENSP00000363591,9606.ENSP00000368767	BAX,GRIN1,BAK1,ASPH
GO:0010536	Positive regulation of activation of Janus kinase activity	5	7	1.24	0.81	0.00060	9606.ENSP00000228534,9606.ENSP00000231228,9606.ENSP00000321345,9606.ENSP00000355627,9606.ENSP00000357470	IL23A,IL12B,IL23R,AGT,IL6R
GO:0010543	Regulation of platelet activation	13	53	0.85	1.12	4.07e-06	PDGFRA,PRKCQ,TXK,FCER1G,NOS3,PRKCD,TLR4,PRKG1,SYK,IL6ST,JAK2,PRKCA,LYN
GO:0010543	Regulation of platelet activation	17	53	0.89	1.47	2.96e-08	9606.ENSP00000252486,9606.ENSP00000257290,9606.ENSP00000263125,9606.ENSP00000264316,9606.ENSP00000286548,9606.ENSP00000289902,9606.ENSP00000297494,9606.ENSP00000308541,9606.ENSP00000331602,9606.ENSP00000357470,9606.ENSP00000363089,9606.ENSP00000363092,9606.ENSP00000364898,9606.ENSP00000370698,9606.ENSP00000371067,9606.ENSP00000408695,9606.ENSP00000428924	APOE,PDGFRA,PRKCQ,TXK,GNAQ,FCER1G,NOS3,F2,PRKCD,IL6R,TLR4,PRKG1,SYK,IL6ST,JAK2,PRKCA,LYN
GO:0010544	Negative regulation of platelet activation	4	19	0.79	0.34	0.0446	PDGFRA,NOS3,PRKCD,PRKG1
GO:0010544	Negative regulation of platelet activation	6	19	0.88	0.6	0.0029	9606.ENSP00000252486,9606.ENSP00000257290,9606.ENSP00000297494,9606.ENSP00000308541,9606.ENSP00000331602,9606.ENSP00000363092	APOE,PDGFRA,NOS3,F2,PRKCD,PRKG1
GO:0010573	Vascular endothelial growth factor production	3	7	1.02	0.37	0.0352	9606.ENSP00000357470,9606.ENSP00000398698,9606.ENSP00000437955	IL6R,TNF,HIF1A
GO:0010575	Positive regulation of vascular endothelial growth factor production	7	29	0.77	0.56	0.0037	9606.ENSP00000221930,9606.ENSP00000245907,9606.ENSP00000336790,9606.ENSP00000370698,9606.ENSP00000384262,9606.ENSP00000418960,9606.ENSP00000437955	TGFB1,C3,ATF4,IL6ST,HPSE,BRCA1,HIF1A
GO:0010592	Positive regulation of lamellipodium assembly	7	29	0.85	0.65	0.0017	RAC2,PIK3CA,HSP90AA1,MTOR,PLCE1,PIK3R1,CDC42
GO:0010592	Positive regulation of lamellipodium assembly	7	29	0.77	0.56	0.0037	9606.ENSP00000249071,9606.ENSP00000263967,9606.ENSP00000293549,9606.ENSP00000335153,9606.ENSP00000354558,9606.ENSP00000428056,9606.ENSP00000497733	RAC2,PIK3CA,WNT1,HSP90AA1,MTOR,PIK3R1,CDC42
GO:0010595	Positive regulation of endothelial cell migration	21	107	0.76	1.32	3.65e-08	PLCG1,RRAS,KDR,PIK3C2A,NOS3,MET,ROCK2,SP1,PDPK1,MAP2K3,AGT,AMOT,PIK3CD,PTK2B,FGFR1,PRKCA,PIK3CG,AKT1,ITGB3,AKT3,PIK3CB
GO:0010595	Positive regulation of endothelial cell migration	25	107	0.75	1.48	1.68e-09	9606.ENSP00000221930,9606.ENSP00000244007,9606.ENSP00000246792,9606.ENSP00000260356,9606.ENSP00000263923,9606.ENSP00000297494,9606.ENSP00000317272,9606.ENSP00000317985,9606.ENSP00000320866,9606.ENSP00000329357,9606.ENSP00000344220,9606.ENSP00000345083,9606.ENSP00000355627,9606.ENSP00000366563,9606.ENSP00000380638,9606.ENSP00000390535,9606.ENSP00000393312,9606.ENSP00000393978,9606.ENSP00000408695,…	TGFB1,PLCG1,RRAS,THBS1,KDR,NOS3,MET,ROCK2,CALR,SP1,PDPK1,MAP2K3,AGT,PIK3CD,PTK2B,PRKD1,FGFR1,PRKD2,PRKCA,PIK3CG,HIF1A,AKT1,ITGB3,AKT3,PIK3CB
GO:0010611	Regulation of cardiac muscle hypertrophy	13	55	0.84	1.09	5.76e-06	SLC9A1,PPARG,ROCK2,SMAD3,ATP2B4,AGT,FOXO1,IL6ST,PPP3CA,ROCK1,PPARA,PRKCA,CAMK2D
GO:0010611	Regulation of cardiac muscle hypertrophy	16	55	0.85	1.3	2.53e-07	9606.ENSP00000162749,9606.ENSP00000222330,9606.ENSP00000263980,9606.ENSP00000287820,9606.ENSP00000317985,9606.ENSP00000332973,9606.ENSP00000350310,9606.ENSP00000355627,9606.ENSP00000368880,9606.ENSP00000369960,9606.ENSP00000370698,9606.ENSP00000378323,9606.ENSP00000382697,9606.ENSP00000385523,9606.ENSP00000408695,9606.ENSP00000425824	TNFRSF1A,GSK3A,SLC9A1,PPARG,ROCK2,SMAD3,ATP2B4,AGT,FOXO1,ADRA1A,IL6ST,PPP3CA,ROCK1,PPARA,PRKCA,CAMK2D
GO:0010613	Positive regulation of cardiac muscle hypertrophy	8	26	0.95	0.87	0.00017	SLC9A1,ROCK2,AGT,IL6ST,PPP3CA,ROCK1,PRKCA,CAMK2D
GO:0010613	Positive regulation of cardiac muscle hypertrophy	9	26	0.92	0.93	7.73e-05	9606.ENSP00000263980,9606.ENSP00000317985,9606.ENSP00000355627,9606.ENSP00000369960,9606.ENSP00000370698,9606.ENSP00000378323,9606.ENSP00000382697,9606.ENSP00000408695,9606.ENSP00000425824	SLC9A1,ROCK2,AGT,ADRA1A,IL6ST,PPP3CA,ROCK1,PRKCA,CAMK2D
GO:0010614	Negative regulation of cardiac muscle hypertrophy	7	29	0.77	0.56	0.0037	9606.ENSP00000162749,9606.ENSP00000222330,9606.ENSP00000287820,9606.ENSP00000332973,9606.ENSP00000350310,9606.ENSP00000368880,9606.ENSP00000385523	TNFRSF1A,GSK3A,PPARG,SMAD3,ATP2B4,FOXO1,PPARA
GO:0010623	Programmed cell death involved in cell development	6	23	0.8	0.52	0.0062	9606.ENSP00000288135,9606.ENSP00000293288,9606.ENSP00000301764,9606.ENSP00000365230,9606.ENSP00000381185,9606.ENSP00000431418	KIT,BAX,DDB1,BCL2L1,BCL2,NTRK1
GO:0010631	Epithelial cell migration	20	98	0.77	1.32	4.92e-08	PIK3R3,KDR,PIK3CA,PXN,KIT,S100P,NOS3,DPP4,RAB13,PTEN,AMOT,IRS2,ITGB1,PTK2B,ITGB2,ROCK1,RHOA,NR4A1,AKT1,PTPN11
GO:0010634	Positive regulation of epithelial cell migration	31	150	0.78	1.78	2.07e-12	PFN1,PLCG1,RRAS,KDR,PIK3C2A,ITGA2,NOS3,PRKCE,ITGA3,MET,ROCK2,SP1,PDPK1,MAP2K3,MTOR,AGT,JUN,AMOT,SRC,IRS2,PIK3CD,PTK2B,FGFR1,PRKCA,PIK3CG,AKT1,ITGB3,IQSEC1,PLCG2,AKT3,PIK3CB
GO:0010634	Positive regulation of epithelial cell migration	35	150	0.75	1.81	3.75e-13	9606.ENSP00000221930,9606.ENSP00000244007,9606.ENSP00000246792,9606.ENSP00000260356,9606.ENSP00000263923,9606.ENSP00000296585,9606.ENSP00000297494,9606.ENSP00000306124,9606.ENSP00000315190,9606.ENSP00000317272,9606.ENSP00000317985,9606.ENSP00000320866,9606.ENSP00000329357,9606.ENSP00000344220,9606.ENSP00000345083,9606.ENSP00000354558,9606.ENSP00000355627,9606.ENSP00000360266,9606.ENSP00000361405,…	TGFB1,PLCG1,RRAS,THBS1,KDR,ITGA2,NOS3,PRKCE,ITGA3,MET,ROCK2,CALR,SP1,PDPK1,MAP2K3,MTOR,AGT,JUN,MMP9,SRC,IRS2,PIK3CD,PTK2B,PRKD1,FGFR1,PRKD2,PRKCA,PIK3CG,HIF1A,AKT1,ITGB3,IQSEC1,PLCG2,AKT3,PIK3CB
GO:0010640	Regulation of platelet-derived growth factor receptor signaling pathway	8	24	0.91	0.81	0.00029	9606.ENSP00000243077,9606.ENSP00000262613,9606.ENSP00000264033,9606.ENSP00000311857,9606.ENSP00000362680,9606.ENSP00000364731,9606.ENSP00000499037,9606.ENSP00000500990	LRP1,SLC9A3R1,CBL,PTPN2,SRC,F7,CBLB,SNCA
GO:0010642	Negative regulation of platelet-derived growth factor receptor signaling pathway	4	13	0.87	0.4	0.0237	9606.ENSP00000243077,9606.ENSP00000262613,9606.ENSP00000311857,9606.ENSP00000500990	LRP1,SLC9A3R1,PTPN2,SNCA
GO:0010649	Regulation of cell communication by electrical coupling	5	16	0.96	0.56	0.0051	CALM3,SLC8A1,CAMK2D,CALM1,CALM2
GO:0010649	Regulation of cell communication by electrical coupling	6	16	0.96	0.68	0.0015	9606.ENSP00000291295,9606.ENSP00000368767,9606.ENSP00000384763,9606.ENSP00000425824,9606.ENSP00000499717,9606.ENSP00000499797	CALM3,ASPH,SLC8A1,CAMK2D,CALM1,CALM2
GO:0010660	Regulation of muscle cell apoptotic process	16	67	0.84	1.29	2.71e-07	PAX8,TP53,PPARG,CAPN2,ATF4,PDPK1,MAP3K5,AGT,JAK2,PTK2B,MAP2K4,CDKN2A,RGL2,CAMK2D,IGF1R,CAMK2A
GO:0010660	Regulation of muscle cell apoptotic process	17	67	0.79	1.22	4.78e-07	9606.ENSP00000231228,9606.ENSP00000263334,9606.ENSP00000269305,9606.ENSP00000287820,9606.ENSP00000303231,9606.ENSP00000336790,9606.ENSP00000344220,9606.ENSP00000351908,9606.ENSP00000355627,9606.ENSP00000371067,9606.ENSP00000380638,9606.ENSP00000410402,9606.ENSP00000418915,9606.ENSP00000425824,9606.ENSP00000431926,9606.ENSP00000497069,9606.ENSP00000500386	IL12B,PAX8,TP53,PPARG,IL12A,ATF4,PDPK1,MAP3K5,AGT,JAK2,PTK2B,MAP2K4,CDKN2A,CAMK2D,AMBRA1,IGF1R,CAMK2A
GO:0010661	Positive regulation of muscle cell apoptotic process	10	25	1.07	1.27	2.56e-06	TP53,PPARG,CAPN2,ATF4,MAP3K5,AGT,MAP2K4,CDKN2A,CAMK2D,CAMK2A
GO:0010661	Positive regulation of muscle cell apoptotic process	11	25	1.03	1.3	1.42e-06	9606.ENSP00000231228,9606.ENSP00000269305,9606.ENSP00000287820,9606.ENSP00000303231,9606.ENSP00000336790,9606.ENSP00000351908,9606.ENSP00000355627,9606.ENSP00000410402,9606.ENSP00000418915,9606.ENSP00000425824,9606.ENSP00000500386	IL12B,TP53,PPARG,IL12A,ATF4,MAP3K5,AGT,MAP2K4,CDKN2A,CAMK2D,CAMK2A
GO:0010665	Regulation of cardiac muscle cell apoptotic process	10	36	0.91	0.99	3.39e-05	PAX8,TP53,CAPN2,PDPK1,MAP3K5,AGT,JAK2,RGL2,CAMK2D,CAMK2A
GO:0010665	Regulation of cardiac muscle cell apoptotic process	9	36	0.78	0.72	0.00057	9606.ENSP00000263334,9606.ENSP00000269305,9606.ENSP00000344220,9606.ENSP00000351908,9606.ENSP00000355627,9606.ENSP00000371067,9606.ENSP00000425824,9606.ENSP00000431926,9606.ENSP00000500386	PAX8,TP53,PDPK1,MAP3K5,AGT,JAK2,CAMK2D,AMBRA1,CAMK2A
GO:0010666	Positive regulation of cardiac muscle cell apoptotic process	6	13	1.13	0.85	0.00033	TP53,CAPN2,MAP3K5,AGT,CAMK2D,CAMK2A
GO:0010666	Positive regulation of cardiac muscle cell apoptotic process	5	13	0.97	0.58	0.0043	9606.ENSP00000269305,9606.ENSP00000351908,9606.ENSP00000355627,9606.ENSP00000425824,9606.ENSP00000500386	TP53,MAP3K5,AGT,CAMK2D,CAMK2A
GO:0010676	Positive regulation of cellular carbohydrate metabolic process	15	53	0.84	1.21	8.81e-07	9606.ENSP00000264867,9606.ENSP00000301764,9606.ENSP00000303830,9606.ENSP00000304895,9606.ENSP00000306124,9606.ENSP00000311857,9606.ENSP00000356094,9606.ENSP00000362680,9606.ENSP00000365016,9606.ENSP00000368880,9606.ENSP00000375892,9606.ENSP00000385523,9606.ENSP00000402723,9606.ENSP00000451828,9606.ENSP00000500990	PPARGC1A,DDB1,INSR,IRS1,PRKCE,PTPN2,AVPR1B,SRC,IRS2,FOXO1,AKT2,PPARA,PTH1R,AKT1,SNCA
GO:0010700	Negative regulation of norepinephrine secretion	3	5	1.16	0.44	0.0192	9606.ENSP00000280155,9606.ENSP00000386069,9606.ENSP00000480573	ADRA2A,ADRA2C,ADRA2B
GO:0010715	Regulation of extracellular matrix disassembly	4	16	0.78	0.34	0.0407	9606.ENSP00000221930,9606.ENSP00000243077,9606.ENSP00000353731,9606.ENSP00000384262	TGFB1,LRP1,DPP4,HPSE
GO:0010737	Protein kinase A signaling	5	17	0.93	0.54	0.0063	PRKACA,EZR,RAB13,PRKACB,PRKACG
GO:0010737	Protein kinase A signaling	7	17	1.0	0.83	0.00031	9606.ENSP00000309591,9606.ENSP00000315011,9606.ENSP00000338934,9606.ENSP00000357564,9606.ENSP00000359719,9606.ENSP00000366488,9606.ENSP00000496414	PRKACA,EDNRA,EZR,RAB13,PRKACB,PRKACG,RDX
GO:0010742	Macrophage derived foam cell differentiation	4	7	1.14	0.58	0.0050	9606.ENSP00000221930,9606.ENSP00000263253,9606.ENSP00000287820,9606.ENSP00000354394	TGFB1,EP300,PPARG,STAT1
GO:0010743	Regulation of macrophage derived foam cell differentiation	8	31	0.88	0.77	0.00046	NFKBIA,NFKB1,ITGAV,PPARG,AGT,PPARA,MAPK9,ITGB3
GO:0010743	Regulation of macrophage derived foam cell differentiation	10	31	0.89	0.97	4.18e-05	9606.ENSP00000216797,9606.ENSP00000226574,9606.ENSP00000233242,9606.ENSP00000261023,9606.ENSP00000287820,9606.ENSP00000355627,9606.ENSP00000385523,9606.ENSP00000394560,9606.ENSP00000398832,9606.ENSP00000452786	NFKBIA,NFKB1,APOB,ITGAV,PPARG,AGT,PPARA,MAPK9,AGTR1,ITGB3
GO:0010744	Positive regulation of macrophage derived foam cell differentiation	5	18	0.83	0.46	0.0122	9606.ENSP00000226574,9606.ENSP00000233242,9606.ENSP00000355627,9606.ENSP00000394560,9606.ENSP00000398832	NFKB1,APOB,AGT,MAPK9,AGTR1
GO:0010745	Negative regulation of macrophage derived foam cell differentiation	5	13	1.05	0.64	0.0025	NFKBIA,ITGAV,PPARG,PPARA,ITGB3
GO:0010745	Negative regulation of macrophage derived foam cell differentiation	5	13	0.97	0.58	0.0043	9606.ENSP00000216797,9606.ENSP00000261023,9606.ENSP00000287820,9606.ENSP00000385523,9606.ENSP00000452786	NFKBIA,ITGAV,PPARG,PPARA,ITGB3
GO:0010748	Negative regulation of long-chain fatty acid import across plasma membrane	3	4	1.34	0.52	0.0102	IRS2,AKT2,AKT1
GO:0010748	Negative regulation of long-chain fatty acid import across plasma membrane	4	4	1.38	0.73	0.0014	9606.ENSP00000260356,9606.ENSP00000365016,9606.ENSP00000375892,9606.ENSP00000451828	THBS1,IRS2,AKT2,AKT1
GO:0010761	Fibroblast migration	6	19	0.96	0.68	0.0015	SLC9A3R1,IQGAP1,LAMTOR2,PIP5K1A,ILK,AKT1
GO:0010761	Fibroblast migration	5	19	0.8	0.45	0.0144	9606.ENSP00000262613,9606.ENSP00000268182,9606.ENSP00000357883,9606.ENSP00000379975,9606.ENSP00000451828	SLC9A3R1,IQGAP1,PIP5K1A,ILK,AKT1
GO:0010762	Regulation of fibroblast migration	9	39	0.83	0.78	0.00033	SLC9A3R1,PRKCE,PTK2,PRR5L,ITGB1,SLC8A1,BRAF,AKT1,ITGB3
GO:0010762	Regulation of fibroblast migration	14	39	0.94	1.38	2.29e-07	9606.ENSP00000221930,9606.ENSP00000260356,9606.ENSP00000262613,9606.ENSP00000275364,9606.ENSP00000306124,9606.ENSP00000341189,9606.ENSP00000361818,9606.ENSP00000368144,9606.ENSP00000379350,9606.ENSP00000384763,9606.ENSP00000400717,9606.ENSP00000419060,9606.ENSP00000451828,9606.ENSP00000452786	TGFB1,THBS1,SLC9A3R1,GNA12,PRKCE,PTK2,SDC4,PRR5L,ITGB1,SLC8A1,GNA13,BRAF,AKT1,ITGB3
GO:0010763	Positive regulation of fibroblast migration	6	16	1.04	0.76	0.00077	PRKCE,PTK2,ITGB1,SLC8A1,AKT1,ITGB3
GO:0010763	Positive regulation of fibroblast migration	8	16	1.08	1.06	3.17e-05	9606.ENSP00000221930,9606.ENSP00000260356,9606.ENSP00000306124,9606.ENSP00000341189,9606.ENSP00000379350,9606.ENSP00000384763,9606.ENSP00000451828,9606.ENSP00000452786	TGFB1,THBS1,PRKCE,PTK2,ITGB1,SLC8A1,AKT1,ITGB3
GO:0010765	Positive regulation of sodium ion transport	9	34	0.89	0.87	0.00014	ACTN4,SLC9A1,FXYD2,SCN4B,SCN5A,SCN1B,AKT1,NOS1,FXYD1
GO:0010765	Positive regulation of sodium ion transport	9	34	0.81	0.76	0.00041	9606.ENSP00000252699,9606.ENSP00000263980,9606.ENSP00000292079,9606.ENSP00000322460,9606.ENSP00000328968,9606.ENSP00000396915,9606.ENSP00000451828,9606.ENSP00000477999,9606.ENSP00000481244	ACTN4,SLC9A1,FXYD2,SCN4B,SCN5A,SCN1B,AKT1,NOS1,FXYD1
GO:0010800	Positive regulation of peptidyl-threonine phosphorylation	8	29	0.91	0.81	0.00031	MAPK1,RIPK2,PRKAG2,CALM3,PLK1,RPTOR,CALM1,CALM2
GO:0010800	Positive regulation of peptidyl-threonine phosphorylation	11	29	0.96	1.18	4.36e-06	9606.ENSP00000215832,9606.ENSP00000220751,9606.ENSP00000221930,9606.ENSP00000222330,9606.ENSP00000284981,9606.ENSP00000287878,9606.ENSP00000291295,9606.ENSP00000307272,9606.ENSP00000496438,9606.ENSP00000499717,9606.ENSP00000499797	MAPK1,RIPK2,TGFB1,GSK3A,APP,PRKAG2,CALM3,RPTOR,S1PR2,CALM1,CALM2
GO:0010822	Positive regulation of mitochondrion organization	18	76	0.76	1.19	4.67e-07	9606.ENSP00000052754,9606.ENSP00000216115,9606.ENSP00000222330,9606.ENSP00000263923,9606.ENSP00000264867,9606.ENSP00000269305,9606.ENSP00000293288,9606.ENSP00000318822,9606.ENSP00000324806,9606.ENSP00000329213,9606.ENSP00000355865,9606.ENSP00000361405,9606.ENSP00000363591,9606.ENSP00000376943,9606.ENSP00000378040,9606.ENSP00000378974,9606.ENSP00000431926,9606.ENSP00000437955	DCN,BIK,GSK3A,KDR,PPARGC1A,TP53,BAX,BID,GSK3B,SIVA1,PRKN,MMP9,BAK1,BCL2L11,BAD,MAPK8,AMBRA1,HIF1A
GO:0010827	Regulation of glucose transmembrane transport	18	73	0.78	1.24	2.84e-07	9606.ENSP00000222330,9606.ENSP00000225577,9606.ENSP00000229795,9606.ENSP00000245907,9606.ENSP00000287878,9606.ENSP00000295797,9606.ENSP00000303830,9606.ENSP00000304895,9606.ENSP00000315011,9606.ENSP00000365016,9606.ENSP00000375892,9606.ENSP00000398698,9606.ENSP00000415416,9606.ENSP00000419060,9606.ENSP00000428056,9606.ENSP00000451828,9606.ENSP00000489597,9606.ENSP00000496129	GSK3A,RPS6KB1,MAPK14,C3,PRKAG2,PRKCI,INSR,IRS1,EDNRA,IRS2,AKT2,TNF,TRIB3,BRAF,PIK3R1,AKT1,PTPN11,PRKCB
GO:0010828	Positive regulation of glucose transmembrane transport	10	43	0.83	0.86	0.00012	MAPK14,PRKCI,INSR,IRS1,IRS2,AKT2,BRAF,PIK3R1,AKT1,PTPN11
GO:0010828	Positive regulation of glucose transmembrane transport	11	43	0.79	0.87	8.52e-05	9606.ENSP00000229795,9606.ENSP00000245907,9606.ENSP00000295797,9606.ENSP00000303830,9606.ENSP00000304895,9606.ENSP00000365016,9606.ENSP00000375892,9606.ENSP00000419060,9606.ENSP00000428056,9606.ENSP00000451828,9606.ENSP00000489597	MAPK14,C3,PRKCI,INSR,IRS1,IRS2,AKT2,BRAF,PIK3R1,AKT1,PTPN11
GO:0010863	Positive regulation of phospholipase C activity	11	40	0.9	1.07	1.24e-05	PDGFRA,PDGFRB,TXK,EGFR,KIT,AGT,FGFR1,ITK,ESR1,HRAS,RASGRP4
GO:0010863	Positive regulation of phospholipase C activity	18	40	1.04	1.96	1.37e-10	9606.ENSP00000257290,9606.ENSP00000261799,9606.ENSP00000264316,9606.ENSP00000275493,9606.ENSP00000282397,9606.ENSP00000286548,9606.ENSP00000288135,9606.ENSP00000299178,9606.ENSP00000315011,9606.ENSP00000355627,9606.ENSP00000356094,9606.ENSP00000363553,9606.ENSP00000369960,9606.ENSP00000393312,9606.ENSP00000398655,9606.ENSP00000405330,9606.ENSP00000407586,9606.ENSP00000443256	PDGFRA,PDGFRB,TXK,EGFR,FLT1,GNAQ,KIT,AVPR1A,EDNRA,AGT,AVPR1B,LPAR1,ADRA1A,FGFR1,ITK,ESR1,HRAS,LPAR2
GO:0010881	Regulation of cardiac muscle contraction by regulation of the release of sequestered calcium ion	9	21	1.1	1.2	6.54e-06	CACNA1C,CALM3,PRKACA,PLN,RYR2,SLC8A1,CAMK2D,CALM1,CALM2
GO:0010881	Regulation of cardiac muscle contraction by regulation of the release of sequestered calcium ion	10	21	1.06	1.25	2.96e-06	9606.ENSP00000266376,9606.ENSP00000291295,9606.ENSP00000309591,9606.ENSP00000350132,9606.ENSP00000355533,9606.ENSP00000368767,9606.ENSP00000384763,9606.ENSP00000425824,9606.ENSP00000499717,9606.ENSP00000499797	CACNA1C,CALM3,PRKACA,PLN,RYR2,ASPH,SLC8A1,CAMK2D,CALM1,CALM2
GO:0010882	Regulation of cardiac muscle contraction by calcium ion signaling	11	25	1.11	1.46	3.15e-07	SLC9A1,CACNA1C,CALM3,PRKACA,TNNI3,PLN,RYR2,SLC8A1,CAMK2D,CALM1,CALM2
GO:0010882	Regulation of cardiac muscle contraction by calcium ion signaling	11	25	1.03	1.3	1.42e-06	9606.ENSP00000263980,9606.ENSP00000266376,9606.ENSP00000291295,9606.ENSP00000309591,9606.ENSP00000350132,9606.ENSP00000355533,9606.ENSP00000368767,9606.ENSP00000384763,9606.ENSP00000425824,9606.ENSP00000499717,9606.ENSP00000499797	SLC9A1,CACNA1C,CALM3,PRKACA,PLN,RYR2,ASPH,SLC8A1,CAMK2D,CALM1,CALM2
GO:0010888	Negative regulation of lipid storage	5	21	0.84	0.46	0.0124	NFKBIA,ITGAV,PPARG,PPARA,ITGB3
GO:0010888	Negative regulation of lipid storage	7	21	0.91	0.72	0.00082	9606.ENSP00000216797,9606.ENSP00000261023,9606.ENSP00000287820,9606.ENSP00000311857,9606.ENSP00000385523,9606.ENSP00000398698,9606.ENSP00000452786	NFKBIA,ITGAV,PPARG,PTPN2,PPARA,TNF,ITGB3
GO:0010902	Positive regulation of very-low-density lipoprotein particle remodeling	2	2	1.38	0.35	0.0489	9606.ENSP00000445002,9606.ENSP00000466775	APOA5,APOC2
GO:0010907	Positive regulation of glucose metabolic process	8	39	0.78	0.64	0.0016	INSR,IRS1,SRC,IRS2,FOXO1,AKT2,PPARA,AKT1
GO:0010907	Positive regulation of glucose metabolic process	11	39	0.83	0.95	4.07e-05	9606.ENSP00000264867,9606.ENSP00000301764,9606.ENSP00000303830,9606.ENSP00000304895,9606.ENSP00000311857,9606.ENSP00000362680,9606.ENSP00000365016,9606.ENSP00000368880,9606.ENSP00000375892,9606.ENSP00000385523,9606.ENSP00000451828	PPARGC1A,DDB1,INSR,IRS1,PTPN2,SRC,IRS2,FOXO1,AKT2,PPARA,AKT1
GO:0010917	Negative regulation of mitochondrial membrane potential	4	10	1.07	0.52	0.0084	BAX,MAPT,PIP5KL1,TRPV1
GO:0010918	Positive regulation of mitochondrial membrane potential	4	12	0.99	0.47	0.0134	BID,AKT2,BAD,AKT1
GO:0010918	Positive regulation of mitochondrial membrane potential	5	12	1.0	0.61	0.0033	9606.ENSP00000318822,9606.ENSP00000375892,9606.ENSP00000378040,9606.ENSP00000451506,9606.ENSP00000451828	BID,AKT2,BAD,TCL1A,AKT1
GO:0010919	Regulation of inositol phosphate biosynthetic process	4	16	0.78	0.34	0.0407	9606.ENSP00000356094,9606.ENSP00000380638,9606.ENSP00000402723,9606.ENSP00000500990	AVPR1B,PTK2B,PTH1R,SNCA
GO:0010921	Regulation of phosphatase activity	21	84	0.78	1.4	1.73e-08	9606.ENSP00000254079,9606.ENSP00000261799,9606.ENSP00000275364,9606.ENSP00000282588,9606.ENSP00000291295,9606.ENSP00000296585,9606.ENSP00000298552,9606.ENSP00000299767,9606.ENSP00000312999,9606.ENSP00000317985,9606.ENSP00000324806,9606.ENSP00000332973,9606.ENSP00000354558,9606.ENSP00000360609,9606.ENSP00000360973,9606.ENSP00000371067,9606.ENSP00000382697,9606.ENSP00000398698,9606.ENSP00000430684,…	PPP1R1B,PDGFRB,GNA12,ITGA1,CALM3,ITGA2,TSC1,HSP90B1,GNAI2,ROCK2,GSK3B,SMAD3,MTOR,HSP90AB1,AGTR2,JAK2,ROCK1,TNF,IKBKB,CALM1,CALM2
GO:0010922	Positive regulation of phosphatase activity	9	36	0.86	0.83	0.00020	PDGFRB,CALM3,ITGA2,SMAD3,MTOR,JAK2,ROCK1,CALM1,CALM2
GO:0010922	Positive regulation of phosphatase activity	13	36	0.94	1.3	6.67e-07	9606.ENSP00000261799,9606.ENSP00000275364,9606.ENSP00000282588,9606.ENSP00000291295,9606.ENSP00000296585,9606.ENSP00000332973,9606.ENSP00000354558,9606.ENSP00000360609,9606.ENSP00000360973,9606.ENSP00000371067,9606.ENSP00000382697,9606.ENSP00000499717,9606.ENSP00000499797	PDGFRB,GNA12,ITGA1,CALM3,ITGA2,SMAD3,MTOR,HSP90AB1,AGTR2,JAK2,ROCK1,CALM1,CALM2
GO:0010958	Regulation of amino acid import across plasma membrane	5	17	0.85	0.48	0.0101	9606.ENSP00000326366,9606.ENSP00000355627,9606.ENSP00000379350,9606.ENSP00000389326,9606.ENSP00000398698	PSEN1,AGT,ITGB1,ACE2,TNF
GO:0010965	Regulation of mitotic sister chromatid separation	24	96	0.86	1.79	4.08e-11	DUSP1,DLGAP5,CCNB1,NDC80,ANAPC5,CENPE,RB1,NUF2,BUB1B,PLK1,BIRC5,BUB1,ANAPC2,ANAPC1,CDC16,UBE2C,CENPF,CDC20,CDC26,CDC23,ANAPC7,ANAPC4,CDC27,ACTB
GO:0010971	Positive regulation of G2/M transition of mitotic cell cycle	6	28	0.8	0.51	0.0074	CCND1,CDC25B,CCNB1,CDC25A,CDC25C,CDK1
GO:0014041	Regulation of neuron maturation	3	8	0.96	0.34	0.0453	9606.ENSP00000304283,9606.ENSP00000366416,9606.ENSP00000381185	RAC3,EDNRB,BCL2
GO:0014061	Regulation of norepinephrine secretion	4	14	0.84	0.38	0.0287	9606.ENSP00000280155,9606.ENSP00000355627,9606.ENSP00000386069,9606.ENSP00000480573	ADRA2A,AGT,ADRA2C,ADRA2B
GO:0014065	Phosphatidylinositol 3-kinase signaling	19	45	1.09	2.23	5.20e-12	PIK3R2,PIK3CA,PIK3C2A,ERBB3,ERBB2,IRS1,CD28,PIK3C2B,PTEN,PIK3CD,PRR5L,PRR5,PIK3R5,PIK3CG,PIK3R1,PIK3C2G,AKT1,IGF1R,PIK3CB
GO:0014065	Phosphatidylinositol 3-kinase signaling	18	45	0.99	1.81	6.14e-10	9606.ENSP00000222254,9606.ENSP00000263967,9606.ENSP00000267101,9606.ENSP00000269571,9606.ENSP00000304895,9606.ENSP00000324890,9606.ENSP00000356155,9606.ENSP00000361021,9606.ENSP00000366563,9606.ENSP00000368144,9606.ENSP00000384848,9606.ENSP00000392812,9606.ENSP00000419260,9606.ENSP00000428056,9606.ENSP00000445381,9606.ENSP00000451828,9606.ENSP00000497069,9606.ENSP00000501150	PIK3R2,PIK3CA,ERBB3,ERBB2,IRS1,CD28,PIK3C2B,PTEN,PIK3CD,PRR5L,PRR5,PIK3R5,PIK3CG,PIK3R1,PIK3C2G,AKT1,IGF1R,PIK3CB
GO:0014066	Regulation of phosphatidylinositol 3-kinase signaling	33	109	0.95	2.55	3.23e-17	DCN,FLT3,HCST,PDGFRA,PDGFRB,SLC9A3R1,KDR,CBL,PIP5K1B,ERBB3,EGFR,KIT,NCF1,INSR,RASGRP1,CD28,PIK3AP1,PTK2,ERBB4,FN1,AGT,PIP5K1A,PTEN,SRC,PRR5L,JAK2,PRR5,PTPN6,FGFR1,RGL2,NTRK1,PIP5K1C,IGF1R
GO:0014066	Regulation of phosphatidylinositol 3-kinase signaling	37	109	0.91	2.58	3.26e-18	9606.ENSP00000052754,9606.ENSP00000219476,9606.ENSP00000241453,9606.ENSP00000246551,9606.ENSP00000257290,9606.ENSP00000261799,9606.ENSP00000262613,9606.ENSP00000263923,9606.ENSP00000264033,9606.ENSP00000265382,9606.ENSP00000267101,9606.ENSP00000275493,9606.ENSP00000282397,9606.ENSP00000288135,9606.ENSP00000303830,9606.ENSP00000308541,9606.ENSP00000321326,9606.ENSP00000324890,9606.ENSP00000339826,…	DCN,TSC2,FLT3,HCST,PDGFRA,PDGFRB,SLC9A3R1,KDR,CBL,PIP5K1B,ERBB3,EGFR,FLT1,KIT,INSR,F2,F2R,CD28,PIK3AP1,PTK2,ERBB4,FN1,AGT,PIP5K1A,PTEN,SRC,FGR,PRR5L,NKX3-1,JAK2,PRR5,PTPN6,FGFR1,TNF,NTRK1,PIP5K1C,IGF1R
GO:0014068	Positive regulation of phosphatidylinositol 3-kinase signaling	26	79	0.98	2.34	2.72e-14	DCN,FLT3,HCST,PDGFRA,PDGFRB,KDR,CBL,ERBB3,KIT,NCF1,INSR,CD28,PIK3AP1,PTK2,ERBB4,FN1,AGT,SRC,PRR5L,JAK2,PRR5,PTPN6,FGFR1,RGL2,NTRK1,IGF1R
GO:0014068	Positive regulation of phosphatidylinositol 3-kinase signaling	30	79	0.96	2.49	7.27e-16	9606.ENSP00000052754,9606.ENSP00000241453,9606.ENSP00000246551,9606.ENSP00000257290,9606.ENSP00000261799,9606.ENSP00000263923,9606.ENSP00000264033,9606.ENSP00000267101,9606.ENSP00000282397,9606.ENSP00000288135,9606.ENSP00000303830,9606.ENSP00000308541,9606.ENSP00000321326,9606.ENSP00000324890,9606.ENSP00000339826,9606.ENSP00000341189,9606.ENSP00000342235,9606.ENSP00000346839,9606.ENSP00000355627,…	DCN,FLT3,HCST,PDGFRA,PDGFRB,KDR,CBL,ERBB3,FLT1,KIT,INSR,F2,F2R,CD28,PIK3AP1,PTK2,ERBB4,FN1,AGT,SRC,FGR,PRR5L,NKX3-1,JAK2,PRR5,PTPN6,FGFR1,TNF,NTRK1,IGF1R
GO:0014075	Response to amine	10	46	0.8	0.81	0.00019	PPP1R1B,CALM3,ITGA2,JAK2,PPP3CA,CDK1,NR4A1,MYD88,CALM1,CALM2
GO:0014075	Response to amine	13	46	0.84	1.08	6.05e-06	9606.ENSP00000254079,9606.ENSP00000291295,9606.ENSP00000296585,9606.ENSP00000315011,9606.ENSP00000332549,9606.ENSP00000370571,9606.ENSP00000371067,9606.ENSP00000378323,9606.ENSP00000440864,9606.ENSP00000496339,9606.ENSP00000498321,9606.ENSP00000499717,9606.ENSP00000499797	PPP1R1B,CALM3,ITGA2,EDNRA,GRIN2A,TH,JAK2,PPP3CA,NR4A1,SLC18A2,MYD88,CALM1,CALM2
GO:0014745	Negative regulation of muscle adaptation	5	10	1.16	0.74	0.0011	PPARG,NOS3,SMAD3,ATP2B4,FOXO1
GO:0014745	Negative regulation of muscle adaptation	5	10	1.08	0.68	0.0018	9606.ENSP00000287820,9606.ENSP00000297494,9606.ENSP00000332973,9606.ENSP00000350310,9606.ENSP00000368880	PPARG,NOS3,SMAD3,ATP2B4,FOXO1
GO:0014812	Muscle cell migration	7	28	0.78	0.58	0.0032	9606.ENSP00000261799,9606.ENSP00000334008,9606.ENSP00000339730,9606.ENSP00000381185,9606.ENSP00000382697,9606.ENSP00000448665,9606.ENSP00000452786	PDGFRB,PARVA,THBS4,BCL2,ROCK1,DDIT3,ITGB3
GO:0014829	Vascular associated smooth muscle contraction	5	17	0.85	0.48	0.0101	9606.ENSP00000222271,9606.ENSP00000315011,9606.ENSP00000355627,9606.ENSP00000366416,9606.ENSP00000384763	COMP,EDNRA,AGT,EDNRB,SLC8A1
GO:0014850	Response to muscle activity	5	24	0.78	0.42	0.0193	ITGA2,RYR2,AGT,PRKAA2,PRKAG3
GO:0014850	Response to muscle activity	7	24	0.85	0.66	0.0015	9606.ENSP00000264867,9606.ENSP00000296585,9606.ENSP00000355533,9606.ENSP00000355627,9606.ENSP00000360290,9606.ENSP00000397133,9606.ENSP00000437955	PPARGC1A,ITGA2,RYR2,AGT,PRKAA2,PRKAG3,HIF1A
GO:0014874	Response to stimulus involved in regulation of muscle adaptation	4	15	0.89	0.4	0.0240	RPS6KB1,SCN5A,AGT,PRKAG3
GO:0014874	Response to stimulus involved in regulation of muscle adaptation	4	15	0.81	0.36	0.0347	9606.ENSP00000225577,9606.ENSP00000328968,9606.ENSP00000355627,9606.ENSP00000397133	RPS6KB1,SCN5A,AGT,PRKAG3
GO:0014896	Muscle hypertrophy	8	33	0.77	0.63	0.0016	9606.ENSP00000261623,9606.ENSP00000354718,9606.ENSP00000355533,9606.ENSP00000355627,9606.ENSP00000369960,9606.ENSP00000378323,9606.ENSP00000410402,9606.ENSP00000497527	CYBA,AKAP13,RYR2,AGT,ADRA1A,PPP3CA,MAP2K4,INPP5F
GO:0014909	Smooth muscle cell migration	4	15	0.89	0.4	0.0240	PDGFRB,PARVA,DDIT3,ITGB3
GO:0014909	Smooth muscle cell migration	5	15	0.91	0.53	0.0068	9606.ENSP00000261799,9606.ENSP00000334008,9606.ENSP00000381185,9606.ENSP00000448665,9606.ENSP00000452786	PDGFRB,PARVA,BCL2,DDIT3,ITGB3
GO:0014910	Regulation of smooth muscle cell migration	19	65	0.85	1.48	1.26e-08	9606.ENSP00000223095,9606.ENSP00000225577,9606.ENSP00000226218,9606.ENSP00000243077,9606.ENSP00000261799,9606.ENSP00000275364,9606.ENSP00000296585,9606.ENSP00000300574,9606.ENSP00000355627,9606.ENSP00000362680,9606.ENSP00000363089,9606.ENSP00000363092,9606.ENSP00000363377,9606.ENSP00000363553,9606.ENSP00000381185,9606.ENSP00000400175,9606.ENSP00000400717,9606.ENSP00000452786,9606.ENSP00000496438	SERPINE1,RPS6KB1,VTN,LRP1,PDGFRB,GNA12,ITGA2,CRK,AGT,SRC,TLR4,PRKG1,FOXO4,LPAR1,BCL2,RHOA,GNA13,ITGB3,S1PR2
GO:0014911	Positive regulation of smooth muscle cell migration	9	36	0.86	0.83	0.00020	RPS6KB1,PDGFRB,ITGA2,CRK,AGT,SRC,TLR4,FOXO4,ITGB3
GO:0014911	Positive regulation of smooth muscle cell migration	12	36	0.91	1.15	4.00e-06	9606.ENSP00000225577,9606.ENSP00000226218,9606.ENSP00000261799,9606.ENSP00000296585,9606.ENSP00000300574,9606.ENSP00000355627,9606.ENSP00000362680,9606.ENSP00000363089,9606.ENSP00000363377,9606.ENSP00000363553,9606.ENSP00000381185,9606.ENSP00000452786	RPS6KB1,VTN,PDGFRB,ITGA2,CRK,AGT,SRC,TLR4,FOXO4,LPAR1,BCL2,ITGB3
GO:0014912	Negative regulation of smooth muscle cell migration	7	26	0.81	0.61	0.0023	9606.ENSP00000223095,9606.ENSP00000243077,9606.ENSP00000275364,9606.ENSP00000363092,9606.ENSP00000400175,9606.ENSP00000400717,9606.ENSP00000496438	SERPINE1,LRP1,GNA12,PRKG1,RHOA,GNA13,S1PR2
GO:0015842	Aminergic neurotransmitter loading into synaptic vesicle	3	4	1.26	0.49	0.0129	9606.ENSP00000370571,9606.ENSP00000387549,9606.ENSP00000496339	TH,SLC18A1,SLC18A2
GO:0015844	Monoamine transport	6	22	0.82	0.54	0.0052	9606.ENSP00000355865,9606.ENSP00000364898,9606.ENSP00000372750,9606.ENSP00000387549,9606.ENSP00000496339,9606.ENSP00000500990	PRKN,SYK,CHRM5,SLC18A1,SLC18A2,SNCA
GO:0015872	Dopamine transport	4	15	0.81	0.36	0.0347	9606.ENSP00000355865,9606.ENSP00000372750,9606.ENSP00000496339,9606.ENSP00000500990	PRKN,CHRM5,SLC18A2,SNCA
GO:0016045	Detection of bacterium	4	17	0.76	0.33	0.0473	9606.ENSP00000260010,9606.ENSP00000354932,9606.ENSP00000379873,9606.ENSP00000389600	TLR2,TLR1,HLA-A,TLR6
GO:0016064	Immunoglobulin mediated immune response	32	95	0.91	2.36	1.04e-15	9606.ENSP00000243611,9606.ENSP00000245907,9606.ENSP00000278407,9606.ENSP00000289902,9606.ENSP00000299367,9606.ENSP00000300134,9606.ENSP00000313419,9606.ENSP00000313875,9606.ENSP00000313967,9606.ENSP00000331602,9606.ENSP00000338010,9606.ENSP00000340019,9606.ENSP00000356024,9606.ENSP00000360797,9606.ENSP00000363079,9606.ENSP00000363770,9606.ENSP00000363773,9606.ENSP00000378131,9606.ENSP00000380697,…	C4BPB,C3,SERPING1,FCER1G,C2,STAT6,CD19,CD46,C1QB,PRKCD,IL21R,HSPD1,CR2,CARD9,MBL2,C1QC,C1QA,CFI,IRF7,MASP2,C1S,C4A,INPP5D,C4B,IGLL5,C1R,LOC102723407,IGHV3-72,IGHV3-43D,BTK,BCL10,MYD88
GO:0016202	Regulation of striated muscle tissue development	4	17	0.84	0.37	0.0336	ERBB3,SMAD3,CENPF,CREB1
GO:0016202	Regulation of striated muscle tissue development	4	17	0.76	0.33	0.0473	9606.ENSP00000221930,9606.ENSP00000267101,9606.ENSP00000332973,9606.ENSP00000387699	TGFB1,ERBB3,SMAD3,CREB1
GO:0016239	Positive regulation of macroautophagy	15	74	0.77	1.07	4.16e-06	DCN,RIPK2,SESN2,MAPK3,KDR,WDR24,ULK1,TBK1,PIP4K2C,MAP3K7,GNAI3,PRKAA2,PIP4K2A,PIP4K2B,IKBKG
GO:0016239	Positive regulation of macroautophagy	17	74	0.75	1.11	1.51e-06	9606.ENSP00000052754,9606.ENSP00000219476,9606.ENSP00000220751,9606.ENSP00000263025,9606.ENSP00000263923,9606.ENSP00000298552,9606.ENSP00000324560,9606.ENSP00000329967,9606.ENSP00000347032,9606.ENSP00000358335,9606.ENSP00000358867,9606.ENSP00000360290,9606.ENSP00000365757,9606.ENSP00000431926,9606.ENSP00000437955,9606.ENSP00000482548,9606.ENSP00000483825	DCN,TSC2,RIPK2,MAPK3,KDR,TSC1,ULK1,TBK1,PIP4K2C,MAP3K7,GNAI3,PRKAA2,PIP4K2A,AMBRA1,HIF1A,PIP4K2B,IKBKG
GO:0016310	Phosphorylation	192	966	0.76	3.31	1.58e-80	MAPK13,MAPK12,MAPK1,TAB1,AURKA,RIPK2,RPS6KB1,IL2,CCND1,CDKN1B,MAPK14,FLT3,CDC25B,HCST,MKNK2,RARA,CSNK1G2,PI4KA,CCNB1,IRAK2,CAMK1,PDGFRA,RIPK1,TLR2,ITPKA,PDGFRB,PKMYT1,RPS6KA6,MAP2K2,MAPK3,EEF2K,PRKCQ,PRKCG,KDR,PIK3CA,ATF2,TXK,PIKFYVE,PRKG2,FNIP2,PI4K2B,ZAP70,PIP5K1B,PRKAR2A,PRKAR2B,MAPKAP1,PIK3C2A,CDK2,ERBB3,ERBB2,SKP2,MYLK4,EGFR,BUB1B,PRKAG2,KIT,ARAF,CALM3,FGFR4,BAX,PRKCI,LRRK2,PLK1,BIRC5,MAP2K1…
GO:0016322	Neuron remodeling	4	13	0.87	0.4	0.0237	9606.ENSP00000245907,9606.ENSP00000284981,9606.ENSP00000315011,9606.ENSP00000363773	C3,APP,EDNRA,C1QA
GO:0016572	Histone phosphorylation	11	33	0.99	1.22	2.72e-06	AURKA,CDK2,RPS6KA4,PRKAA1,PRKAA2,JAK2,CDK1,PRKCA,RPS6KA5,CCNA2,PRKCB
GO:0016572	Histone phosphorylation	9	33	0.82	0.78	0.00034	9606.ENSP00000266970,9606.ENSP00000333896,9606.ENSP00000346148,9606.ENSP00000360290,9606.ENSP00000371067,9606.ENSP00000393183,9606.ENSP00000408695,9606.ENSP00000479667,9606.ENSP00000496129	CDK2,RPS6KA4,PRKAA1,PRKAA2,JAK2,DCAF1,PRKCA,RPS6KA5,PRKCB
GO:0018105	Peptidyl-serine phosphorylation	64	193	0.99	3.86	1.35e-35	MAPK13,MAPK12,MAPK1,AURKA,RPS6KB1,MAPK14,MKNK2,CSNK1G2,CAMK1,RIPK1,RPS6KA6,MAP2K2,PRKCQ,PRKCG,PIKFYVE,PRKG2,CDK2,BAX,PRKCI,LRRK2,PLK1,PRKCE,RPS6KB2,PRKACA,ROCK2,ULK1,TBK1,PRKCD,RPS6KA4,PDPK1,PRKAA1,CSNK1G3,MTOR,MAPKAPK2,CHUK,PRKAA2,SRC,SYK,PRKCZ,RPS6KA3,CSNK1A1L,AKT2,CDK1,ULK2,MAPK8,ILK,CSNK1E,CSNK1D,ROCK1,NLK,MAPK9,MAPKAPK3,PRKCA,RPS6KA2,CAMK2D,IKBKB,RPS6KA1,MAPKAPK5,AKT1,RPS6KA5,PRKCB,MKNK1,CAM…
GO:0018105	Peptidyl-serine phosphorylation	70	193	0.94	3.72	3.90e-36	9606.ENSP00000211287,9606.ENSP00000215659,9606.ENSP00000215832,9606.ENSP00000222330,9606.ENSP00000225577,9606.ENSP00000229795,9606.ENSP00000250896,9606.ENSP00000255641,9606.ENSP00000256460,9606.ENSP00000259808,9606.ENSP00000262752,9606.ENSP00000262948,9606.ENSP00000263125,9606.ENSP00000263431,9606.ENSP00000264399,9606.ENSP00000266970,9606.ENSP00000282356,9606.ENSP00000293288,9606.ENSP00000295797,…	MAPK13,MAPK12,MAPK1,GSK3A,RPS6KB1,MAPK14,MKNK2,CSNK1G2,CAMK1,RIPK1,RPS6KA6,MAP2K2,PRKCQ,PRKCG,PRKG2,CDK2,CAMK4,BAX,PRKCI,PRKCE,RPS6KB2,PRKACA,ROCK2,ULK1,GSK3B,TBK1,PRKCD,RPS6KA4,SGK2,PDPK1,PRKAA1,CSNK1G3,MTOR,MAPKAPK2,SGK1,CHUK,PRKAA2,STK4,SRC,BAK1,SYK,PRKCZ,RPS6KA3,CSNK1A1L,AKT2,ULK2,MAPK8,SGK3,ILK,CSNK1E,BCL2,CSNK1D,ROCK1,NLK,PRKD1,PRKD2,MAPK9,MAPKAPK3,PRKCA,RPS6KA2,CAMK2D,IKBKB,RPS6KA1,MAPKAPK…
GO:0018107	Peptidyl-threonine phosphorylation	20	78	0.87	1.61	1.79e-09	MAPK1,ATF2,LRRK2,PRKACA,ROCK2,ULK1,TBK1,PRKCD,PDPK1,MTOR,MYLK2,CDK1,MAPK8,ROCK1,NLK,PRKCA,CAMK2D,AKT1,PRKCB,CAMK2A
GO:0018107	Peptidyl-threonine phosphorylation	24	78	0.87	1.82	3.55e-11	9606.ENSP00000215832,9606.ENSP00000222330,9606.ENSP00000264110,9606.ENSP00000309591,9606.ENSP00000317985,9606.ENSP00000324560,9606.ENSP00000324806,9606.ENSP00000329967,9606.ENSP00000331602,9606.ENSP00000344220,9606.ENSP00000354558,9606.ENSP00000365162,9606.ENSP00000378974,9606.ENSP00000381185,9606.ENSP00000382697,9606.ENSP00000384625,9606.ENSP00000390535,9606.ENSP00000393183,9606.ENSP00000393978,…	MAPK1,GSK3A,ATF2,PRKACA,ROCK2,ULK1,GSK3B,TBK1,PRKCD,PDPK1,MTOR,MYLK2,MAPK8,BCL2,ROCK1,NLK,PRKD1,DCAF1,PRKD2,PRKCA,CAMK2D,AKT1,PRKCB,CAMK2A
GO:0018108	Peptidyl-tyrosine phosphorylation	44	176	0.86	2.55	3.15e-20	RIPK2,IL2,FLT3,PDGFRA,PDGFRB,MAP2K2,MAPK3,KDR,TXK,ZAP70,ERBB3,ERBB2,EGFR,KIT,FGFR4,MAP2K1,INSR,MET,PRKCD,FGFR3,PTK2,ERBB4,MAP2K3,FYN,SRC,SYK,JAK2,ALK,PTK2B,MAP2K7,PTPN6,FGFR1,ITK,FGFR2,MAP2K4,BRAF,LYN,NTRK1,JAK3,MAP2K6,RPS6KA5,BTK,IGF1R,JAK1
GO:0018108	Peptidyl-tyrosine phosphorylation	46	176	0.8	2.31	7.72e-19	9606.ENSP00000220751,9606.ENSP00000226730,9606.ENSP00000241453,9606.ENSP00000257290,9606.ENSP00000261799,9606.ENSP00000262345,9606.ENSP00000262948,9606.ENSP00000263025,9606.ENSP00000263923,9606.ENSP00000264316,9606.ENSP00000264972,9606.ENSP00000267101,9606.ENSP00000269571,9606.ENSP00000275493,9606.ENSP00000282397,9606.ENSP00000288135,9606.ENSP00000302486,9606.ENSP00000303830,9606.ENSP00000317272,…	RIPK2,IL2,FLT3,PDGFRA,PDGFRB,IL12RB2,MAP2K2,MAPK3,KDR,TXK,ZAP70,ERBB3,ERBB2,EGFR,FLT1,KIT,MAP2K1,INSR,MET,PRKCD,PTK2,ERBB4,MAP2K3,FYN,SRC,FGR,SYK,HCK,JAK2,ALK,PTK2B,MAP2K7,PTPN6,FGFR1,ITK,MAP2K4,BRAF,LYN,NTRK1,TYK2,JAK3,MAP2K6,RPS6KA5,BTK,IGF1R,JAK1
GO:0018209	Peptidyl-serine modification	65	214	0.95	3.6	2.83e-34	DCN,MAPK13,MAPK12,MAPK1,AURKA,RPS6KB1,MAPK14,MKNK2,CSNK1G2,CAMK1,RIPK1,RPS6KA6,MAP2K2,PRKCQ,PRKCG,PIKFYVE,PRKG2,CDK2,BAX,PRKCI,LRRK2,PLK1,PRKCE,RPS6KB2,PRKACA,ROCK2,ULK1,TBK1,PRKCD,RPS6KA4,PDPK1,PRKAA1,CSNK1G3,MTOR,MAPKAPK2,CHUK,PRKAA2,SRC,SYK,PRKCZ,RPS6KA3,CSNK1A1L,AKT2,CDK1,ULK2,MAPK8,ILK,CSNK1E,CSNK1D,ROCK1,NLK,MAPK9,MAPKAPK3,PRKCA,RPS6KA2,CAMK2D,IKBKB,RPS6KA1,MAPKAPK5,AKT1,RPS6KA5,PRKCB,MKNK1…
GO:0018209	Peptidyl-serine modification	71	214	0.9	3.47	1.20e-34	9606.ENSP00000052754,9606.ENSP00000211287,9606.ENSP00000215659,9606.ENSP00000215832,9606.ENSP00000222330,9606.ENSP00000225577,9606.ENSP00000229795,9606.ENSP00000250896,9606.ENSP00000255641,9606.ENSP00000256460,9606.ENSP00000259808,9606.ENSP00000262752,9606.ENSP00000262948,9606.ENSP00000263125,9606.ENSP00000263431,9606.ENSP00000264399,9606.ENSP00000266970,9606.ENSP00000282356,9606.ENSP00000293288,…	DCN,MAPK13,MAPK12,MAPK1,GSK3A,RPS6KB1,MAPK14,MKNK2,CSNK1G2,CAMK1,RIPK1,RPS6KA6,MAP2K2,PRKCQ,PRKCG,PRKG2,CDK2,CAMK4,BAX,PRKCI,PRKCE,RPS6KB2,PRKACA,ROCK2,ULK1,GSK3B,TBK1,PRKCD,RPS6KA4,SGK2,PDPK1,PRKAA1,CSNK1G3,MTOR,MAPKAPK2,SGK1,CHUK,PRKAA2,STK4,SRC,BAK1,SYK,PRKCZ,RPS6KA3,CSNK1A1L,AKT2,ULK2,MAPK8,SGK3,ILK,CSNK1E,BCL2,CSNK1D,ROCK1,NLK,PRKD1,PRKD2,MAPK9,MAPKAPK3,PRKCA,RPS6KA2,CAMK2D,IKBKB,RPS6KA1,MAP…
GO:0019062	Virion attachment to host cell	5	11	1.04	0.64	0.0025	9606.ENSP00000315477,9606.ENSP00000316228,9606.ENSP00000353731,9606.ENSP00000360609,9606.ENSP00000389326	CD209,CLEC4M,DPP4,HSP90AB1,ACE2
GO:0019098	Reproductive behavior	10	39	0.79	0.81	0.00020	9606.ENSP00000231509,9606.ENSP00000254079,9606.ENSP00000264637,9606.ENSP00000284981,9606.ENSP00000299178,9606.ENSP00000361021,9606.ENSP00000361965,9606.ENSP00000369647,9606.ENSP00000370571,9606.ENSP00000379904	NR3C1,PPP1R1B,THRA,APP,AVPR1A,PTEN,ADA,AVP,TH,THRB
GO:0019228	Neuronal action potential	7	33	0.79	0.58	0.0032	KCNMB4,GJD2,KCNMB3,SCN5A,MTOR,KCNMB2,SCN7A
GO:0019228	Neuronal action potential	9	33	0.82	0.78	0.00034	9606.ENSP00000258111,9606.ENSP00000319370,9606.ENSP00000328968,9606.ENSP00000334198,9606.ENSP00000352011,9606.ENSP00000354558,9606.ENSP00000385019,9606.ENSP00000407592,9606.ENSP00000496114	KCNMB4,KCNMB3,SCN5A,CACNA1H,CACNA1G,MTOR,CACNA1I,KCNMB2,SCN7A
GO:0019229	Regulation of vasoconstriction	19	63	0.86	1.52	8.30e-09	9606.ENSP00000258111,9606.ENSP00000280155,9606.ENSP00000299178,9606.ENSP00000306662,9606.ENSP00000321326,9606.ENSP00000355627,9606.ENSP00000356094,9606.ENSP00000368766,9606.ENSP00000369647,9606.ENSP00000369960,9606.ENSP00000386069,9606.ENSP00000389326,9606.ENSP00000393333,9606.ENSP00000398832,9606.ENSP00000400175,9606.ENSP00000407592,9606.ENSP00000450482,9606.ENSP00000480573,9606.ENSP00000496396	KCNMB4,ADRA2A,AVPR1A,ADRA1B,F2R,AGT,AVPR1B,ADRA1D,AVP,ADRA1A,ADRA2C,ACE2,TBXA2R,AGTR1,RHOA,KCNMB2,BDKRB2,ADRA2B,AVPR2
GO:0019722	Calcium-mediated signaling	45	169	0.81	2.33	1.07e-18	9606.ENSP00000244007,9606.ENSP00000263923,9606.ENSP00000263980,9606.ENSP00000264972,9606.ENSP00000266376,9606.ENSP00000284981,9606.ENSP00000291295,9606.ENSP00000294728,9606.ENSP00000299178,9606.ENSP00000300659,9606.ENSP00000306253,9606.ENSP00000309591,9606.ENSP00000332549,9606.ENSP00000344220,9606.ENSP00000346148,9606.ENSP00000350132,9606.ENSP00000352608,9606.ENSP00000354558,9606.ENSP00000355533,…	PLCG1,KDR,SLC9A1,ZAP70,CACNA1C,APP,CALM3,VCAM1,AVPR1A,NFATC3,ITPR1,PRKACA,GRIN2A,PDPK1,PRKAA1,PLN,RYR1,MTOR,RYR2,GRIN1,ADA,NR5A1,ITPR3,SYK,EDNRB,ASPH,ITPR2,PPP3CB,PPP3CA,NFATC2,PPP3CC,SLC8A1,CXCR4,NFATC1,PLA2G4B,TNF,AGTR1,CAMK2D,TRPV1,PLCG2,BTK,RYR3,PPP3R2,CALM1,CALM2
GO:0019932	Second-messenger-mediated signaling	61	239	0.79	2.58	1.38e-24	9606.ENSP00000242057,9606.ENSP00000244007,9606.ENSP00000252486,9606.ENSP00000263923,9606.ENSP00000263980,9606.ENSP00000264972,9606.ENSP00000266376,9606.ENSP00000284981,9606.ENSP00000291295,9606.ENSP00000294728,9606.ENSP00000297323,9606.ENSP00000297494,9606.ENSP00000299178,9606.ENSP00000300659,9606.ENSP00000306253,9606.ENSP00000309591,9606.ENSP00000324804,9606.ENSP00000327251,9606.ENSP00000332549,…	AHR,PLCG1,APOE,KDR,SLC9A1,ZAP70,CACNA1C,APP,CALM3,VCAM1,ADCY1,NOS3,AVPR1A,NFATC3,ITPR1,PRKACA,PPP2R1A,NOS2,GRIN2A,PDPK1,PRKAA1,PLN,RYR1,MTOR,RYR2,AGT,GRIN1,AGTR2,ADA,NR5A1,PRKG1,ITPR3,SYK,EDNRB,ASPH,PDX1,ITPR2,PPP3CB,PPP3CA,NFATC2,PPP3CC,KSR1,SLC8A1,CXCR4,CREB1,NFATC1,TBXA2R,RAPGEF3,PLA2G4B,TNF,AGTR1,PPP2CA,CAMK2D,TRPV1,NOS1,PLCG2,BTK,RYR3,PPP3R2,CALM1,CALM2
GO:0021589	Cerebellum structural organization	2	2	1.38	0.35	0.0489	9606.ENSP00000324173,9606.ENSP00000360280	HSPA5,DAB1
GO:0021932	Hindbrain radial glia guided cell migration	3	8	1.04	0.37	0.0357	DAB1,ITGB1,CTNNA2
GO:0022614	Membrane to membrane docking	4	5	1.29	0.67	0.0023	9606.ENSP00000294728,9606.ENSP00000338934,9606.ENSP00000353408,9606.ENSP00000382697	VCAM1,EZR,MSN,ROCK1
GO:0030048	Actin filament-based movement	21	98	0.8	1.43	9.66e-09	KCNQ1,ACTN4,PIK3CA,SLC9A1,KCNN2,CACNA1C,GJA1,CACNA1D,KCNJ3,SCN4B,SCN5A,PARVA,RYR2,KCNE1,ROCK1,NEDD4L,SCN1B,CAMK2D,KCNJ5,KCNE1B,MYO1C
GO:0030071	Regulation of mitotic metaphase/anaphase transition	22	91	0.85	1.64	5.68e-10	DUSP1,DLGAP5,CCNB1,NDC80,ANAPC5,CENPE,RB1,NUF2,BUB1B,PLK1,BIRC5,BUB1,CDC16,UBE2C,CENPF,CDC20,CDC26,CDC23,ANAPC7,ANAPC4,CDC27,ACTB
GO:0030167	Proteoglycan catabolic process	3	5	1.16	0.44	0.0192	9606.ENSP00000264039,9606.ENSP00000384262,9606.ENSP00000483570	GPC1,HPSE,BTK
GO:0030168	Platelet activation	19	97	0.76	1.23	2.05e-07	VCL,MAPK14,PDGFRA,PIK3CA,TLN1,FN1,VAV3,VAV2,SRC,SYK,ILK,PTPN6,PIK3CG,ITGB3,ACTG1,VAV1,PLCG2,ACTB,PIK3CB
GO:0030168	Platelet activation	27	97	0.83	1.81	1.07e-11	9606.ENSP00000222271,9606.ENSP00000229795,9606.ENSP00000248076,9606.ENSP00000257290,9606.ENSP00000261405,9606.ENSP00000263967,9606.ENSP00000280155,9606.ENSP00000308541,9606.ENSP00000316029,9606.ENSP00000321326,9606.ENSP00000346839,9606.ENSP00000359073,9606.ENSP00000360916,9606.ENSP00000362680,9606.ENSP00000364898,9606.ENSP00000379975,9606.ENSP00000386069,9606.ENSP00000391592,9606.ENSP00000400717,…	COMP,MAPK14,F2RL3,PDGFRA,VWF,PIK3CA,ADRA2A,F2,TLN1,F2R,FN1,VAV3,VAV2,SRC,SYK,ILK,ADRA2C,PTPN6,GNA13,PIK3CG,ITGB3,ACTG1,VAV1,ADRA2B,PLCG2,ACTB,PIK3CB
GO:0030193	Regulation of blood coagulation	18	70	0.79	1.28	1.67e-07	9606.ENSP00000223095,9606.ENSP00000226218,9606.ENSP00000233156,9606.ENSP00000234071,9606.ENSP00000252486,9606.ENSP00000257290,9606.ENSP00000260356,9606.ENSP00000278407,9606.ENSP00000297494,9606.ENSP00000308541,9606.ENSP00000321326,9606.ENSP00000331602,9606.ENSP00000356671,9606.ENSP00000363092,9606.ENSP00000364731,9606.ENSP00000384262,9606.ENSP00000384957,9606.ENSP00000393333	SERPINE1,VTN,TFPI,PROC,APOE,PDGFRA,THBS1,SERPING1,NOS3,F2,F2R,PRKCD,SERPINC1,PRKG1,F7,HPSE,F11,TBXA2R
GO:0030194	Positive regulation of blood coagulation	8	28	0.84	0.73	0.00065	9606.ENSP00000223095,9606.ENSP00000226218,9606.ENSP00000260356,9606.ENSP00000308541,9606.ENSP00000321326,9606.ENSP00000364731,9606.ENSP00000384262,9606.ENSP00000393333	SERPINE1,VTN,THBS1,F2,F2R,F7,HPSE,TBXA2R
GO:0030195	Negative regulation of blood coagulation	12	46	0.8	0.95	2.99e-05	9606.ENSP00000223095,9606.ENSP00000226218,9606.ENSP00000233156,9606.ENSP00000234071,9606.ENSP00000252486,9606.ENSP00000257290,9606.ENSP00000278407,9606.ENSP00000297494,9606.ENSP00000308541,9606.ENSP00000331602,9606.ENSP00000363092,9606.ENSP00000384957	SERPINE1,VTN,TFPI,PROC,APOE,PDGFRA,SERPING1,NOS3,F2,PRKCD,PRKG1,F11
GO:0030220	Platelet formation	4	18	0.81	0.35	0.0390	EP300,ACTN1,PTPN6,PTPN11
GO:0030220	Platelet formation	5	18	0.83	0.46	0.0122	9606.ENSP00000263253,9606.ENSP00000330237,9606.ENSP00000377941,9606.ENSP00000391592,9606.ENSP00000489597	EP300,CASP9,ACTN1,PTPN6,PTPN11
GO:0030449	Regulation of complement activation	9	22	1.0	1.04	2.77e-05	9606.ENSP00000243611,9606.ENSP00000245907,9606.ENSP00000278407,9606.ENSP00000296280,9606.ENSP00000313875,9606.ENSP00000356024,9606.ENSP00000356399,9606.ENSP00000363869,9606.ENSP00000378131	C4BPB,C3,SERPING1,MASP1,CD46,CR2,CFH,VSIG4,CFI
GO:0030451	Regulation of complement activation, alternative pathway	4	6	1.21	0.62	0.0035	9606.ENSP00000245907,9606.ENSP00000356399,9606.ENSP00000363869,9606.ENSP00000378131	C3,CFH,VSIG4,CFI
GO:0030518	Intracellular steroid hormone receptor signaling pathway	13	56	0.83	1.07	6.77e-06	NR3C1,YWHAH,DAXX,MED1,PGR,ESR2,SRC,AR,JAK2,KDM3A,RHOA,ESR1,PTGES3
GO:0030518	Intracellular steroid hormone receptor signaling pathway	14	56	0.78	1.04	7.62e-06	9606.ENSP00000231509,9606.ENSP00000266000,9606.ENSP00000300651,9606.ENSP00000320866,9606.ENSP00000325120,9606.ENSP00000343925,9606.ENSP00000362680,9606.ENSP00000363822,9606.ENSP00000370253,9606.ENSP00000371067,9606.ENSP00000386660,9606.ENSP00000400175,9606.ENSP00000405330,9606.ENSP00000482075	NR3C1,DAXX,MED1,CALR,PGR,ESR2,SRC,AR,NKX3-1,JAK2,KDM3A,RHOA,ESR1,PTGES3
GO:0030521	Androgen receptor signaling pathway	5	21	0.76	0.41	0.0198	9606.ENSP00000266000,9606.ENSP00000363822,9606.ENSP00000370253,9606.ENSP00000386660,9606.ENSP00000400175	DAXX,AR,NKX3-1,KDM3A,RHOA
GO:0030522	Intracellular receptor signaling pathway	36	148	0.85	2.24	3.07e-16	NFKBIA,RIPK2,NR3C1,AHR,YWHAH,ACTN4,RARA,THRA,DAXX,PPARG,MED1,PGR,RORC,ESR2,CRKL,MAP3K7,SRC,NR5A1,TLR4,AR,JAK2,THRB,IRF7,RELA,NCOA1,PPARA,KDM3A,NCOA2,RHOA,ESR1,RXRA,TRAF6,NR4A1,MAP2K6,IRF3,PTGES3
GO:0030522	Intracellular receptor signaling pathway	37	148	0.78	1.99	1.10e-14	9606.ENSP00000216797,9606.ENSP00000220751,9606.ENSP00000231509,9606.ENSP00000242057,9606.ENSP00000252699,9606.ENSP00000254066,9606.ENSP00000264637,9606.ENSP00000264657,9606.ENSP00000266000,9606.ENSP00000287820,9606.ENSP00000300651,9606.ENSP00000320866,9606.ENSP00000325120,9606.ENSP00000327025,9606.ENSP00000343925,9606.ENSP00000346300,9606.ENSP00000358335,9606.ENSP00000362680,9606.ENSP00000362690,…	NFKBIA,RIPK2,NR3C1,AHR,ACTN4,RARA,THRA,STAT3,DAXX,PPARG,MED1,CALR,PGR,RORC,ESR2,CRKL,MAP3K7,SRC,NR5A1,TLR4,AR,NKX3-1,JAK2,THRB,IRF7,RELA,NCOA1,PPARA,KDM3A,NCOA2,RHOA,ESR1,RXRA,TRAF6,NR4A1,MAP2K6,PTGES3
GO:0030838	Positive regulation of actin filament polymerization	11	53	0.78	0.85	0.00011	PFN1,VASP,PRKCE,DLG1,MTOR,GRB2,EVL,PTK2B,RHOA,LMOD2,MLST8
GO:0030853	Negative regulation of granulocyte differentiation	4	10	0.99	0.48	0.0122	9606.ENSP00000254066,9606.ENSP00000363770,9606.ENSP00000364589,9606.ENSP00000405338	RARA,C1QC,CUL4A,INPP5D
GO:0030866	Cortical actin cytoskeleton organization	8	40	0.77	0.62	0.0018	TLN1,ROCK2,EZR,DLG1,RAB13,ROCK1,RACGAP1,IKBKB
GO:0030878	Thyroid gland development	9	28	0.97	1.0	4.00e-05	MAPK1,MAP2K2,MAPK3,PAX8,THRA,MAP2K1,SMAD3,RAF1,BRAF
GO:0030878	Thyroid gland development	11	28	0.98	1.2	3.35e-06	9606.ENSP00000215832,9606.ENSP00000220616,9606.ENSP00000262948,9606.ENSP00000263025,9606.ENSP00000263334,9606.ENSP00000264637,9606.ENSP00000302486,9606.ENSP00000315011,9606.ENSP00000332973,9606.ENSP00000401888,9606.ENSP00000419060	MAPK1,TG,MAP2K2,MAPK3,PAX8,THRA,MAP2K1,EDNRA,SMAD3,RAF1,BRAF
GO:0030888	Regulation of B cell proliferation	15	67	0.81	1.16	1.43e-06	IL2,AHR,TICAM1,TLR9,VAV3,PTEN,ADA,TLR4,IRS2,TIRAP,NFATC2,INPP5D,CDKN2A,LYN,BTK
GO:0030888	Regulation of B cell proliferation	17	67	0.79	1.22	4.78e-07	9606.ENSP00000226730,9606.ENSP00000242057,9606.ENSP00000248244,9606.ENSP00000353874,9606.ENSP00000359073,9606.ENSP00000361021,9606.ENSP00000361965,9606.ENSP00000363089,9606.ENSP00000365016,9606.ENSP00000376445,9606.ENSP00000379330,9606.ENSP00000381185,9606.ENSP00000384849,9606.ENSP00000405338,9606.ENSP00000418915,9606.ENSP00000428924,9606.ENSP00000483570	IL2,AHR,TICAM1,TLR9,VAV3,PTEN,ADA,TLR4,IRS2,TIRAP,NFATC2,BCL2,CDKN1A,INPP5D,CDKN2A,LYN,BTK
GO:0030889	Negative regulation of B cell proliferation	5	19	0.88	0.5	0.0090	PTEN,INPP5D,CDKN2A,LYN,BTK
GO:0030889	Negative regulation of B cell proliferation	5	19	0.8	0.45	0.0144	9606.ENSP00000361021,9606.ENSP00000405338,9606.ENSP00000418915,9606.ENSP00000428924,9606.ENSP00000483570	PTEN,INPP5D,CDKN2A,LYN,BTK
GO:0030890	Positive regulation of B cell proliferation	10	45	0.81	0.83	0.00017	IL2,TICAM1,TLR9,VAV3,ADA,TLR4,IRS2,TIRAP,NFATC2,BTK
GO:0030890	Positive regulation of B cell proliferation	12	45	0.81	0.97	2.50e-05	9606.ENSP00000226730,9606.ENSP00000248244,9606.ENSP00000353874,9606.ENSP00000359073,9606.ENSP00000361965,9606.ENSP00000363089,9606.ENSP00000365016,9606.ENSP00000376445,9606.ENSP00000379330,9606.ENSP00000381185,9606.ENSP00000384849,9606.ENSP00000483570	IL2,TICAM1,TLR9,VAV3,ADA,TLR4,IRS2,TIRAP,NFATC2,BCL2,CDKN1A,BTK
GO:0030949	Positive regulation of vascular endothelial growth factor receptor signaling pathway	7	14	1.08	0.94	0.00012	9606.ENSP00000226218,9606.ENSP00000293379,9606.ENSP00000311127,9606.ENSP00000393978,9606.ENSP00000437955,9606.ENSP00000452786,9606.ENSP00000496129	VTN,ITGA5,VEGFB,PRKD2,HIF1A,ITGB3,PRKCB
GO:0031000	Response to caffeine	5	15	0.99	0.59	0.0041	PPARG,PRKAA1,CACNA1S,RYR2,SLC8A1
GO:0031000	Response to caffeine	7	15	1.05	0.9	0.00017	9606.ENSP00000287820,9606.ENSP00000346148,9606.ENSP00000352608,9606.ENSP00000355192,9606.ENSP00000355533,9606.ENSP00000384763,9606.ENSP00000489262	PPARG,PRKAA1,RYR1,CACNA1S,RYR2,SLC8A1,RYR3
GO:0031098	Stress-activated protein kinase signaling cascade	33	79	1.09	3.25	1.28e-20	MAPK13,MAPK1,RIPK2,NFKB1,MAPK14,ARHGEF6,MAPK3,ATF2,DAXX,LRRK2,SMAD3,MAPK11,MAP2K3,DUSP9,CRKL,MAP3K5,AGT,DUSP10,MAPKAPK2,MAP3K7,IRAK1,CARD9,NOX1,TLR4,MAPK8,MAP2K7,MAPK9,RHOA,MAP2K4,IKBKB,MAP2K6,IRAK4,MYD88
GO:0031098	Stress-activated protein kinase signaling cascade	33	79	1.0	2.84	2.08e-18	9606.ENSP00000211287,9606.ENSP00000215832,9606.ENSP00000220751,9606.ENSP00000226574,9606.ENSP00000229795,9606.ENSP00000263025,9606.ENSP00000264110,9606.ENSP00000266000,9606.ENSP00000332973,9606.ENSP00000333685,9606.ENSP00000345083,9606.ENSP00000345853,9606.ENSP00000346300,9606.ENSP00000348089,9606.ENSP00000351908,9606.ENSP00000355627,9606.ENSP00000355866,9606.ENSP00000356070,9606.ENSP00000358335,…	MAPK13,MAPK1,RIPK2,NFKB1,MAPK14,MAPK3,ATF2,DAXX,SMAD3,MAPK11,MAP2K3,DUSP9,CRKL,ERCC6,MAP3K5,AGT,DUSP10,MAPKAPK2,MAP3K7,IRAK1,CARD9,TLR4,GPS1,MAPK8,MAP2K7,MAPK9,TNF,RHOA,MAP2K4,IKBKB,MAP2K6,IRAK4,MYD88
GO:0031102	Neuron projection regeneration	8	31	0.8	0.67	0.0011	9606.ENSP00000265131,9606.ENSP00000324560,9606.ENSP00000356646,9606.ENSP00000360266,9606.ENSP00000371067,9606.ENSP00000381185,9606.ENSP00000481780,9606.ENSP00000482169	TNC,ULK1,TNR,JUN,JAK2,BCL2,MAPK8IP3,NEFL
GO:0031103	Axon regeneration	7	25	0.83	0.63	0.0019	9606.ENSP00000265131,9606.ENSP00000356646,9606.ENSP00000360266,9606.ENSP00000371067,9606.ENSP00000381185,9606.ENSP00000481780,9606.ENSP00000482169	TNC,TNR,JUN,JAK2,BCL2,MAPK8IP3,NEFL
GO:0031145	Anaphase-promoting complex-dependent catabolic process	13	23	1.22	1.95	1.80e-09	ANAPC5,ANAPC2,ANAPC1,CDC16,UBE2C,CDC20,CDC26,CDC23,ANAPC7,ANAPC13,ANAPC4,CDC27,ANAPC10
GO:0031279	Regulation of cyclase activity	15	78	0.75	1.02	7.25e-06	MAPK14,MAPK3,CACNA1C,CACNA1D,CALM3,NOS3,GNAI2,GNAI3,AKAP5,MAPK8,RAF1,NOS1,ORAI1,CALM1,CALM2
GO:0031279	Regulation of cyclase activity	19	78	0.77	1.27	1.41e-07	9606.ENSP00000229795,9606.ENSP00000263025,9606.ENSP00000266376,9606.ENSP00000288139,9606.ENSP00000291295,9606.ENSP00000297494,9606.ENSP00000312999,9606.ENSP00000315011,9606.ENSP00000327251,9606.ENSP00000358867,9606.ENSP00000366416,9606.ENSP00000378207,9606.ENSP00000378974,9606.ENSP00000401888,9606.ENSP00000477999,9606.ENSP00000482568,9606.ENSP00000496396,9606.ENSP00000499717,9606.ENSP00000499797	MAPK14,MAPK3,CACNA1C,CACNA1D,CALM3,NOS3,GNAI2,EDNRA,NOS2,GNAI3,EDNRB,AKAP5,MAPK8,RAF1,NOS1,ORAI1,AVPR2,CALM1,CALM2
GO:0031281	Positive regulation of cyclase activity	13	53	0.85	1.12	4.07e-06	MAPK14,MAPK3,CACNA1C,CACNA1D,CALM3,NOS3,AKAP5,MAPK8,RAF1,NOS1,ORAI1,CALM1,CALM2
GO:0031281	Positive regulation of cyclase activity	16	53	0.86	1.34	1.66e-07	9606.ENSP00000229795,9606.ENSP00000263025,9606.ENSP00000266376,9606.ENSP00000288139,9606.ENSP00000291295,9606.ENSP00000297494,9606.ENSP00000315011,9606.ENSP00000327251,9606.ENSP00000378207,9606.ENSP00000378974,9606.ENSP00000401888,9606.ENSP00000477999,9606.ENSP00000482568,9606.ENSP00000496396,9606.ENSP00000499717,9606.ENSP00000499797	MAPK14,MAPK3,CACNA1C,CACNA1D,CALM3,NOS3,EDNRA,NOS2,AKAP5,MAPK8,RAF1,NOS1,ORAI1,AVPR2,CALM1,CALM2
GO:0031295	T cell costimulation	11	42	0.88	1.03	1.82e-05	PIK3CA,ICOS,CD28,FYN,DPP4,SRC,PTPN6,LYN,AKT1,VAV1,PTPN11
GO:0031295	T cell costimulation	12	42	0.84	1.02	1.44e-05	9606.ENSP00000263056,9606.ENSP00000263967,9606.ENSP00000319476,9606.ENSP00000324890,9606.ENSP00000346671,9606.ENSP00000353731,9606.ENSP00000362680,9606.ENSP00000391592,9606.ENSP00000428924,9606.ENSP00000451828,9606.ENSP00000472929,9606.ENSP00000489597	MAP3K8,PIK3CA,ICOS,CD28,FYN,DPP4,SRC,PTPN6,LYN,AKT1,VAV1,PTPN11
GO:0031589	Cell-substrate adhesion	48	195	0.78	2.24	9.26e-19	9606.ENSP00000200181,9606.ENSP00000215637,9606.ENSP00000222573,9606.ENSP00000226218,9606.ENSP00000239462,9606.ENSP00000258341,9606.ENSP00000261023,9606.ENSP00000261405,9606.ENSP00000262407,9606.ENSP00000264187,9606.ENSP00000264741,9606.ENSP00000267082,9606.ENSP00000282588,9606.ENSP00000283249,9606.ENSP00000293379,9606.ENSP00000294728,9606.ENSP00000296181,9606.ENSP00000296585,9606.ENSP00000298552,…	ITGB4,MADCAM1,ITGB8,VTN,TNN,LAMC1,ITGAV,VWF,ITGA2B,NID1,ITGA9,ITGB7,ITGA1,ITGB6,ITGA5,VCAM1,ITGB5,ITGA2,TSC1,PRKCE,ITGA3,ITGA11,PARVA,FN1,ITGAL,THBS3,PIP5K1A,ITGA10,SRC,ITGA8,BCL2L11,ACTN1,ITGB1,ILK,ITGA4,PTK2B,ITGB2,BCL2,HPSE,PARVB,PARVG,RHOA,TNXB,BRAF,PIK3R1,ITGB3,CTNNB1,ITGAM
GO:0031638	Zymogen activation	14	59	0.76	0.99	1.26e-05	9606.ENSP00000218099,9606.ENSP00000220751,9606.ENSP00000265164,9606.ENSP00000308541,9606.ENSP00000330237,9606.ENSP00000332549,9606.ENSP00000356771,9606.ENSP00000363591,9606.ENSP00000364709,9606.ENSP00000364731,9606.ENSP00000368767,9606.ENSP00000378040,9606.ENSP00000384957,9606.ENSP00000444271	F9,RIPK2,CASP6,F2,CASP9,GRIN2A,F5,BAK1,F10,F7,ASPH,BAD,F11,C1R
GO:0031645	Negative regulation of nervous system process	5	20	0.78	0.43	0.0172	9606.ENSP00000299178,9606.ENSP00000361021,9606.ENSP00000369647,9606.ENSP00000383376,9606.ENSP00000398698	AVPR1A,PTEN,AVP,JAM2,TNF
GO:0031663	Lipopolysaccharide-mediated signaling pathway	21	39	1.2	2.81	7.73e-15	MAPK1,NFKBIA,RIPK2,MAPK14,TICAM1,IRAK2,TLR2,MAPK3,LY96,NOS3,PRKCE,IRAK1,TLR4,CD14,LYN,AKT1,IRF3,PLCG2,MALT1,BCL10,MYD88
GO:0031663	Lipopolysaccharide-mediated signaling pathway	23	39	1.15	2.81	2.48e-15	9606.ENSP00000215832,9606.ENSP00000216797,9606.ENSP00000220751,9606.ENSP00000221930,9606.ENSP00000229795,9606.ENSP00000248244,9606.ENSP00000256458,9606.ENSP00000260010,9606.ENSP00000263025,9606.ENSP00000284818,9606.ENSP00000297494,9606.ENSP00000306124,9606.ENSP00000358997,9606.ENSP00000363089,9606.ENSP00000365012,9606.ENSP00000385519,9606.ENSP00000398698,9606.ENSP00000428924,9606.ENSP00000451828,…	MAPK1,NFKBIA,RIPK2,TGFB1,MAPK14,TICAM1,IRAK2,TLR2,MAPK3,LY96,NOS3,PRKCE,IRAK1,TLR4,HCK,CD14,TNF,LYN,AKT1,PLCG2,MALT1,BCL10,MYD88
GO:0031666	Positive regulation of lipopolysaccharide-mediated signaling pathway	4	10	1.07	0.52	0.0084	LY96,CD14,PRKCA,TRAF6
GO:0031666	Positive regulation of lipopolysaccharide-mediated signaling pathway	4	10	0.99	0.48	0.0122	9606.ENSP00000284818,9606.ENSP00000385519,9606.ENSP00000408695,9606.ENSP00000433623	LY96,CD14,PRKCA,TRAF6
GO:0031668	Cellular response to extracellular stimulus	55	248	0.81	2.54	3.21e-23	MAPK1,ITFG2,NPRL2,SESN2,PRKAB2,WDR59,RRAGB,MAPK3,CBL,ATF2,MAPKAP1,TP53,FLCN,PPARG,PRKAG2,WDR24,LRRK2,SIK2,FOS,RPTOR,FOSL1,C12orf66,RNF152,PRKAG1,ULK1,ATF4,KPTN,FOXO3,MIOS,PRKAA1,MAX,TFEB,MAP3K5,MTOR,PIK3C2B,RRAGD,PRKAA2,RRAGC,FOXO1,RRAGA,MAPK8,ITGA4,SEH1L,PRR5,NCOA1,PPARA,ATP2B1,PRKAG3,FNIP1,LYN,PRKAB1,SZT2,MLST8,NPRL3,DEPDC5
GO:0031669	Cellular response to nutrient levels	51	217	0.84	2.59	1.75e-22	MAPK1,ITFG2,NPRL2,SESN2,PRKAB2,WDR59,RRAGB,MAPK3,CBL,ATF2,MAPKAP1,TP53,FLCN,PPARG,PRKAG2,WDR24,LRRK2,SIK2,RPTOR,C12orf66,RNF152,PRKAG1,ULK1,ATF4,KPTN,FOXO3,MIOS,PRKAA1,MAX,TFEB,MAP3K5,MTOR,PIK3C2B,RRAGD,PRKAA2,RRAGC,FOXO1,RRAGA,MAPK8,SEH1L,PRR5,NCOA1,PPARA,ATP2B1,PRKAG3,FNIP1,PRKAB1,SZT2,MLST8,NPRL3,DEPDC5
GO:0031915	Positive regulation of synaptic plasticity	3	9	0.99	0.35	0.0445	ADCY8,ANAPC2,CDC20
GO:0031929	TOR signaling	19	37	1.18	2.52	3.66e-13	RPS6KB1,LAMTOR5,MAPKAP1,LAMTOR1,FLCN,RPTOR,RPS6KB2,EIF4EBP1,LAMTOR4,MTOR,LAMTOR2,EIF4EBP2,PRR5L,PRR5,FNIP1,LAMTOR3,AKT1,MLST8,NPRL3
GO:0031929	TOR signaling	13	37	0.93	1.28	8.51e-07	9606.ENSP00000225577,9606.ENSP00000307272,9606.ENSP00000308413,9606.ENSP00000340691,9606.ENSP00000343118,9606.ENSP00000354558,9606.ENSP00000362314,9606.ENSP00000368144,9606.ENSP00000384848,9606.ENSP00000424183,9606.ENSP00000437955,9606.ENSP00000451828,9606.ENSP00000457870	RPS6KB1,RPTOR,RPS6KB2,EIF4EBP1,LAMTOR4,MTOR,EIF4EBP2,PRR5L,PRR5,LAMTOR3,HIF1A,AKT1,MLST8
GO:0031958	Corticosteroid receptor signaling pathway	4	7	1.22	0.63	0.0034	NR3C1,YWHAH,JAK2,PTGES3
GO:0031958	Corticosteroid receptor signaling pathway	4	7	1.14	0.58	0.0050	9606.ENSP00000231509,9606.ENSP00000320866,9606.ENSP00000371067,9606.ENSP00000482075	NR3C1,CALR,JAK2,PTGES3
GO:0031998	Regulation of fatty acid beta-oxidation	5	20	0.86	0.48	0.0106	IRS1,IRS2,AKT2,PPARA,AKT1
GO:0031998	Regulation of fatty acid beta-oxidation	5	20	0.78	0.43	0.0172	9606.ENSP00000304895,9606.ENSP00000365016,9606.ENSP00000375892,9606.ENSP00000385523,9606.ENSP00000451828	IRS1,IRS2,AKT2,PPARA,AKT1
GO:0032000	Positive regulation of fatty acid beta-oxidation	4	11	1.03	0.5	0.0107	IRS1,IRS2,AKT2,PPARA
GO:0032000	Positive regulation of fatty acid beta-oxidation	4	11	0.94	0.45	0.0154	9606.ENSP00000304895,9606.ENSP00000365016,9606.ENSP00000375892,9606.ENSP00000385523	IRS1,IRS2,AKT2,PPARA
GO:0032006	Regulation of TOR signaling	42	108	1.05	3.56	2.55e-25	ITFG2,NPRL2,SESN2,LAMTOR5,WDR59,RHEB,TELO2,RRAGB,PIK3CA,LAMTOR1,FLCN,DEPTOR,ARAF,WDR24,RPTOR,C12orf66,RNF152,KPTN,MIOS,LAMTOR4,PRKAA1,LAMTOR2,RRAGD,PRKAA2,RRAGC,TTI1,RRAGA,SEC13,AKT1S1,SLC38A9,PIP4P1,SEH1L,CASTOR1,FNIP1,LAMTOR3,MAPKAPK5,SZT2,MLST8,TBC1D7,NPRL3,DEPDC5,AKT3
GO:0032006	Regulation of TOR signaling	25	108	0.75	1.46	1.98e-09	9606.ENSP00000219476,9606.ENSP00000222330,9606.ENSP00000262187,9606.ENSP00000262850,9606.ENSP00000263967,9606.ENSP00000275364,9606.ENSP00000286234,9606.ENSP00000290277,9606.ENSP00000298552,9606.ENSP00000307272,9606.ENSP00000316357,9606.ENSP00000343118,9606.ENSP00000346148,9606.ENSP00000358423,9606.ENSP00000360290,9606.ENSP00000362092,9606.ENSP00000369899,9606.ENSP00000375711,9606.ENSP00000381102,…	TSC2,GSK3A,RHEB,RRAGB,PIK3CA,GNA12,DEPTOR,ARAF,TSC1,RPTOR,USP9X,LAMTOR4,PRKAA1,RRAGD,PRKAA2,RRAGC,RRAGA,AKT1S1,PIP4P1,LAMTOR3,HIF1A,MAPKAPK5,MLST8,TBC1D7,AKT3
GO:0032007	Negative regulation of TOR signaling	23	52	1.11	2.65	7.87e-15	ITFG2,NPRL2,SESN2,WDR59,FLCN,DEPTOR,WDR24,C12orf66,RNF152,KPTN,MIOS,PRKAA1,PRKAA2,SEC13,AKT1S1,SEH1L,CASTOR1,FNIP1,MAPKAPK5,SZT2,TBC1D7,NPRL3,DEPDC5
GO:0032008	Positive regulation of TOR signaling	24	48	1.16	2.96	2.24e-16	LAMTOR5,WDR59,RHEB,TELO2,RRAGB,PIK3CA,LAMTOR1,FLCN,WDR24,RPTOR,MIOS,LAMTOR4,LAMTOR2,RRAGD,RRAGC,RRAGA,SEC13,SLC38A9,PIP4P1,SEH1L,FNIP1,LAMTOR3,MLST8,AKT3
GO:0032008	Positive regulation of TOR signaling	13	48	0.82	1.05	8.90e-06	9606.ENSP00000262187,9606.ENSP00000262850,9606.ENSP00000263967,9606.ENSP00000307272,9606.ENSP00000316357,9606.ENSP00000343118,9606.ENSP00000358423,9606.ENSP00000362092,9606.ENSP00000369899,9606.ENSP00000381102,9606.ENSP00000424183,9606.ENSP00000457870,9606.ENSP00000500582	RHEB,RRAGB,PIK3CA,RPTOR,USP9X,LAMTOR4,RRAGD,RRAGC,RRAGA,PIP4P1,LAMTOR3,MLST8,AKT3
GO:0032026	Response to magnesium ion	5	19	0.8	0.45	0.0144	9606.ENSP00000227507,9606.ENSP00000260356,9606.ENSP00000385519,9606.ENSP00000489262,9606.ENSP00000500990	CCND1,THBS1,CD14,RYR3,SNCA
GO:0032060	Bleb assembly	4	10	0.99	0.48	0.0122	9606.ENSP00000353452,9606.ENSP00000359643,9606.ENSP00000363553,9606.ENSP00000382697	MYLK,LPAR3,LPAR1,ROCK1
GO:0032147	Activation of protein kinase activity	40	203	0.76	1.96	2.34e-15	TRAF2,CCNB1,MAP2K2,PIK3CA,DAXX,ERBB3,IQGAP1,EGFR,ADCY8,PRKAG2,CALM3,TPX2,MAP2K1,INSR,RPTOR,CKS1B,PRKCD,SPDYA,ERBB4,PDPK1,DLG1,MTOR,KIF14,MAP3K7,IRAK1,SRC,CKS2,PRKCZ,JAK2,ALK,TIRAP,PTK2B,TLR6,TRAF6,ITGB3,MLST8,MAP2K6,MALT1,CALM1,CALM2
GO:0032148	Activation of protein kinase B activity	8	29	0.82	0.71	0.00079	9606.ENSP00000280155,9606.ENSP00000303830,9606.ENSP00000344220,9606.ENSP00000354558,9606.ENSP00000362680,9606.ENSP00000367830,9606.ENSP00000386069,9606.ENSP00000480573	ADRA2A,INSR,PDPK1,MTOR,SRC,PRKCZ,ADRA2C,ADRA2B
GO:0032369	Negative regulation of lipid transport	7	30	0.83	0.63	0.0021	NFKB1,ITGAV,IRS2,AKT2,AKT1,ITGB3,PTPN11
GO:0032369	Negative regulation of lipid transport	11	30	0.95	1.15	5.67e-06	9606.ENSP00000226574,9606.ENSP00000252486,9606.ENSP00000260356,9606.ENSP00000261023,9606.ENSP00000365016,9606.ENSP00000375892,9606.ENSP00000451828,9606.ENSP00000452786,9606.ENSP00000465356,9606.ENSP00000466775,9606.ENSP00000489597	NFKB1,APOE,THBS1,ITGAV,IRS2,AKT2,AKT1,ITGB3,APOC1,APOC2,PTPN11
GO:0032375	Negative regulation of cholesterol transport	4	14	0.84	0.38	0.0287	9606.ENSP00000226574,9606.ENSP00000252486,9606.ENSP00000465356,9606.ENSP00000466775	NFKB1,APOE,APOC1,APOC2
GO:0032410	Negative regulation of transporter activity	20	86	0.75	1.26	1.14e-07	9606.ENSP00000155840,9606.ENSP00000231948,9606.ENSP00000262613,9606.ENSP00000280155,9606.ENSP00000291295,9606.ENSP00000306124,9606.ENSP00000350132,9606.ENSP00000353874,9606.ENSP00000355627,9606.ENSP00000361405,9606.ENSP00000378306,9606.ENSP00000378323,9606.ENSP00000380878,9606.ENSP00000382226,9606.ENSP00000425824,9606.ENSP00000477875,9606.ENSP00000498330,9606.ENSP00000499717,9606.ENSP00000499797,…	KCNQ1,CRBN,SLC9A3R1,ADRA2A,CALM3,PRKCE,PLN,TLR9,AGT,MMP9,PPP3CB,PPP3CA,PPP3CC,KCNE1,CAMK2D,KCNE1B,PPP3R2,CALM1,CALM2,SNCA
GO:0032413	Negative regulation of ion transmembrane transporter activity	15	78	0.75	1.02	7.25e-06	KCNQ1,SLC9A3R1,CALM3,PRKCE,PLN,TLR9,AGT,CACNA1F,PPP3CA,KCNE1,NEDD4L,CAMK2D,KCNE1B,CALM1,CALM2
GO:0032413	Negative regulation of ion transmembrane transporter activity	19	78	0.77	1.27	1.41e-07	9606.ENSP00000155840,9606.ENSP00000231948,9606.ENSP00000262613,9606.ENSP00000280155,9606.ENSP00000291295,9606.ENSP00000306124,9606.ENSP00000350132,9606.ENSP00000353874,9606.ENSP00000355627,9606.ENSP00000361405,9606.ENSP00000378306,9606.ENSP00000378323,9606.ENSP00000380878,9606.ENSP00000382226,9606.ENSP00000425824,9606.ENSP00000477875,9606.ENSP00000498330,9606.ENSP00000499717,9606.ENSP00000499797	KCNQ1,CRBN,SLC9A3R1,ADRA2A,CALM3,PRKCE,PLN,TLR9,AGT,MMP9,PPP3CB,PPP3CA,PPP3CC,KCNE1,CAMK2D,KCNE1B,PPP3R2,CALM1,CALM2
GO:0032418	Lysosome localization	14	57	0.85	1.19	1.45e-06	CBL,LAMTOR1,FLCN,KIT,KIF5B,RASGRP1,TFEB,SYK,PIK3CD,PIP4P1,S100A13,PIK3CG,LYN,BTK
GO:0032465	Regulation of cytokinesis	19	94	0.77	1.27	1.35e-07	AURKA,CDC25B,PIN1,KIF23,FLCN,CALM3,PLK1,BIRC5,PRKCE,KIF14,BCL2L1,PRC1,KIF20A,RHOA,RACGAP1,IGF1R,CDC42,CALM1,CALM2
GO:0032467	Positive regulation of cytokinesis	9	45	0.77	0.69	0.00080	CDC25B,KIF23,BIRC5,PRKCE,KIF14,RHOA,RACGAP1,IGF1R,CDC42
GO:0032469	Endoplasmic reticulum calcium ion homeostasis	7	27	0.8	0.6	0.0027	9606.ENSP00000284981,9606.ENSP00000293288,9606.ENSP00000306253,9606.ENSP00000326366,9606.ENSP00000363591,9606.ENSP00000381185,9606.ENSP00000425824	APP,BAX,ITPR1,PSEN1,BAK1,BCL2,CAMK2D
GO:0032479	Regulation of type I interferon production	20	103	0.75	1.27	9.99e-08	RIPK2,TICAM1,TLR2,TBK1,HSP90AA1,HSPD1,TLR9,IRAK1,CHUK,TLR4,SYK,TIRAP,TRAF3,IRF7,CD14,MAVS,IRF3,PLCG2,PTPN11,MYD88
GO:0032481	Positive regulation of type I interferon production	18	63	0.92	1.62	3.58e-09	RIPK2,TICAM1,TLR2,TBK1,HSP90AA1,HSPD1,TLR9,IRAK1,CHUK,TLR4,SYK,IRF7,CD14,MAVS,IRF3,PLCG2,PTPN11,MYD88
GO:0032481	Positive regulation of type I interferon production	18	63	0.84	1.4	4.47e-08	9606.ENSP00000220751,9606.ENSP00000248244,9606.ENSP00000260010,9606.ENSP00000329967,9606.ENSP00000335153,9606.ENSP00000340019,9606.ENSP00000353874,9606.ENSP00000354394,9606.ENSP00000358997,9606.ENSP00000359424,9606.ENSP00000363089,9606.ENSP00000364898,9606.ENSP00000380697,9606.ENSP00000385519,9606.ENSP00000401980,9606.ENSP00000482457,9606.ENSP00000489597,9606.ENSP00000498321	RIPK2,TICAM1,TLR2,TBK1,HSP90AA1,HSPD1,TLR9,STAT1,IRAK1,CHUK,TLR4,SYK,IRF7,CD14,MAVS,PLCG2,PTPN11,MYD88
GO:0032486	Rap protein signal transduction	4	10	1.07	0.52	0.0084	RAP1B,RAPGEF2,RAP1A,RAPGEF3
GO:0032490	Detection of molecule of bacterial origin	5	12	1.08	0.67	0.0020	TLR2,LY96,TLR1,TLR4,TLR6
GO:0032490	Detection of molecule of bacterial origin	6	12	1.08	0.81	0.00048	9606.ENSP00000260010,9606.ENSP00000284818,9606.ENSP00000354932,9606.ENSP00000363089,9606.ENSP00000389600,9606.ENSP00000415941	TLR2,LY96,TLR1,TLR4,TLR6,C4B
GO:0032494	Response to peptidoglycan	4	13	0.95	0.45	0.0164	RIPK2,CARD9,RELA,MYD88
GO:0032494	Response to peptidoglycan	4	13	0.87	0.4	0.0237	9606.ENSP00000220751,9606.ENSP00000360797,9606.ENSP00000384273,9606.ENSP00000498321	RIPK2,CARD9,RELA,MYD88
GO:0032495	Response to muramyl dipeptide	6	20	0.94	0.65	0.0019	NFKBIA,RIPK2,MAPK14,ARHGEF2,CARD9,RELA
GO:0032495	Response to muramyl dipeptide	5	20	0.78	0.43	0.0172	9606.ENSP00000216797,9606.ENSP00000220751,9606.ENSP00000229795,9606.ENSP00000360797,9606.ENSP00000384273	NFKBIA,RIPK2,MAPK14,CARD9,RELA
GO:0032515	Negative regulation of phosphoprotein phosphatase activity	5	26	0.75	0.39	0.0250	PPP1R1B,GNAI2,ROCK2,ROCK1,IKBKB
GO:0032515	Negative regulation of phosphoprotein phosphatase activity	7	26	0.81	0.61	0.0023	9606.ENSP00000254079,9606.ENSP00000312999,9606.ENSP00000317985,9606.ENSP00000324806,9606.ENSP00000382697,9606.ENSP00000398698,9606.ENSP00000430684	PPP1R1B,GNAI2,ROCK2,GSK3B,ROCK1,TNF,IKBKB
GO:0032516	Positive regulation of phosphoprotein phosphatase activity	6	22	0.9	0.61	0.0028	PDGFRB,CALM3,MTOR,JAK2,CALM1,CALM2
GO:0032516	Positive regulation of phosphoprotein phosphatase activity	10	22	1.04	1.22	4.06e-06	9606.ENSP00000261799,9606.ENSP00000275364,9606.ENSP00000282588,9606.ENSP00000291295,9606.ENSP00000354558,9606.ENSP00000360609,9606.ENSP00000360973,9606.ENSP00000371067,9606.ENSP00000499717,9606.ENSP00000499797	PDGFRB,GNA12,ITGA1,CALM3,MTOR,HSP90AB1,AGTR2,JAK2,CALM1,CALM2
GO:0032528	Microvillus organization	4	13	0.95	0.45	0.0164	SLC9A3R1,RAPGEF2,EZR,PTPN11
GO:0032570	Response to progesterone	8	39	0.78	0.64	0.0016	FOSB,TLR2,FOS,FOSL1,SRC,BAD,NCOA2,IGF1R
GO:0032570	Response to progesterone	10	39	0.79	0.81	0.00020	9606.ENSP00000221930,9606.ENSP00000245919,9606.ENSP00000260010,9606.ENSP00000260356,9606.ENSP00000306245,9606.ENSP00000310170,9606.ENSP00000362680,9606.ENSP00000378040,9606.ENSP00000399968,9606.ENSP00000497069	TGFB1,FOSB,TLR2,THBS1,FOS,FOSL1,SRC,BAD,NCOA2,IGF1R
GO:0032648	Regulation of interferon-beta production	13	58	0.82	1.04	9.33e-06	RIPK2,TICAM1,TLR2,TBK1,HSP90AA1,TLR9,TLR4,TIRAP,TRAF3,IRF7,MAVS,IRF3,PTPN11
GO:0032653	Regulation of interleukin-10 production	16	60	0.81	1.21	6.62e-07	9606.ENSP00000228534,9606.ENSP00000231228,9606.ENSP00000260010,9606.ENSP00000264657,9606.ENSP00000313875,9606.ENSP00000321345,9606.ENSP00000324890,9606.ENSP00000340019,9606.ENSP00000353874,9606.ENSP00000355361,9606.ENSP00000363089,9606.ENSP00000364898,9606.ENSP00000367830,9606.ENSP00000432511,9606.ENSP00000482457,9606.ENSP00000483570	IL23A,IL12B,TLR2,STAT3,CD46,IL23R,CD28,HSPD1,TLR9,CD47,TLR4,SYK,PRKCZ,JAK3,PLCG2,BTK
GO:0032655	Regulation of interleukin-12 production	15	64	0.83	1.21	8.71e-07	RIPK2,NFKB1,MAPK14,TLR2,MAPK11,HSPD1,TLR9,TLR4,AGER,SYK,TIRAP,RELA,JAK3,TRAF6,PLCG2
GO:0032655	Regulation of interleukin-12 production	19	64	0.86	1.5	1.02e-08	9606.ENSP00000220751,9606.ENSP00000226574,9606.ENSP00000228534,9606.ENSP00000229795,9606.ENSP00000231228,9606.ENSP00000260010,9606.ENSP00000260356,9606.ENSP00000321345,9606.ENSP00000333685,9606.ENSP00000340019,9606.ENSP00000353874,9606.ENSP00000355361,9606.ENSP00000363089,9606.ENSP00000364898,9606.ENSP00000376445,9606.ENSP00000384273,9606.ENSP00000432511,9606.ENSP00000433623,9606.ENSP00000482457	RIPK2,NFKB1,IL23A,MAPK14,IL12B,TLR2,THBS1,IL23R,MAPK11,HSPD1,TLR9,CD47,TLR4,SYK,TIRAP,RELA,JAK3,TRAF6,PLCG2
GO:0032660	Regulation of interleukin-17 production	8	41	0.75	0.61	0.0021	IL2,PRKCQ,CARD9,TLR4,JAK2,DDIT3,BTK,MYD88
GO:0032660	Regulation of interleukin-17 production	15	41	0.95	1.48	6.08e-08	9606.ENSP00000221930,9606.ENSP00000226730,9606.ENSP00000228534,9606.ENSP00000231228,9606.ENSP00000263125,9606.ENSP00000303231,9606.ENSP00000321345,9606.ENSP00000360797,9606.ENSP00000363089,9606.ENSP00000371067,9606.ENSP00000431885,9606.ENSP00000448665,9606.ENSP00000470788,9606.ENSP00000483570,9606.ENSP00000498321	TGFB1,IL2,IL23A,IL12B,PRKCQ,IL12A,IL23R,CARD9,TLR4,JAK2,TYK2,DDIT3,IL12RB1,BTK,MYD88
GO:0032667	Regulation of interleukin-23 production	4	10	0.99	0.48	0.0122	9606.ENSP00000221930,9606.ENSP00000363089,9606.ENSP00000482457,9606.ENSP00000498321	TGFB1,TLR4,PLCG2,MYD88
GO:0032673	Regulation of interleukin-4 production	7	34	0.78	0.57	0.0037	RARA,PRKCQ,FCER1G,CD28,SYK,PRKCZ,DDIT3
GO:0032677	Regulation of interleukin-8 production	23	86	0.81	1.57	9.94e-10	9606.ENSP00000223095,9606.ENSP00000259808,9606.ENSP00000260010,9606.ENSP00000264657,9606.ENSP00000302924,9606.ENSP00000321326,9606.ENSP00000327251,9606.ENSP00000353874,9606.ENSP00000354932,9606.ENSP00000357470,9606.ENSP00000363089,9606.ENSP00000364898,9606.ENSP00000376445,9606.ENSP00000384273,9606.ENSP00000385519,9606.ENSP00000389600,9606.ENSP00000393978,9606.ENSP00000398698,9606.ENSP00000401980,…	SERPINE1,RIPK1,TLR2,STAT3,IL17D,F2R,NOS2,TLR9,TLR1,IL6R,TLR4,SYK,TIRAP,RELA,CD14,TLR6,PRKD2,TNF,MAVS,DDIT3,TLR5,BCL10,MYD88
GO:0032693	Negative regulation of interleukin-10 production	5	21	0.76	0.41	0.0198	9606.ENSP00000228534,9606.ENSP00000231228,9606.ENSP00000321345,9606.ENSP00000432511,9606.ENSP00000483570	IL23A,IL12B,IL23R,JAK3,BTK
GO:0032700	Negative regulation of interleukin-17 production	5	15	0.91	0.53	0.0068	9606.ENSP00000221930,9606.ENSP00000231228,9606.ENSP00000303231,9606.ENSP00000363089,9606.ENSP00000448665	TGFB1,IL12B,IL12A,TLR4,DDIT3
GO:0032725	Positive regulation of granulocyte macrophage colony-stimulating factor production	4	15	0.89	0.4	0.0240	RASGRP1,TLR9,CARD9,SYK
GO:0032725	Positive regulation of granulocyte macrophage colony-stimulating factor production	7	15	1.05	0.9	0.00017	9606.ENSP00000228534,9606.ENSP00000231228,9606.ENSP00000302924,9606.ENSP00000321345,9606.ENSP00000353874,9606.ENSP00000360797,9606.ENSP00000364898	IL23A,IL12B,IL17D,IL23R,TLR9,CARD9,SYK
GO:0032727	Positive regulation of interferon-alpha production	9	25	1.02	1.08	1.96e-05	RIPK2,TBK1,HSPD1,TLR9,CHUK,TLR4,IRF7,MAVS,IRF3
GO:0032727	Positive regulation of interferon-alpha production	9	25	0.94	0.96	6.08e-05	9606.ENSP00000220751,9606.ENSP00000329967,9606.ENSP00000340019,9606.ENSP00000353874,9606.ENSP00000354394,9606.ENSP00000359424,9606.ENSP00000363089,9606.ENSP00000380697,9606.ENSP00000401980	RIPK2,TBK1,HSPD1,TLR9,STAT1,CHUK,TLR4,IRF7,MAVS
GO:0032728	Positive regulation of interferon-beta production	11	41	0.89	1.05	1.51e-05	RIPK2,TICAM1,TLR2,TBK1,HSP90AA1,TLR9,TLR4,IRF7,MAVS,IRF3,PTPN11
GO:0032728	Positive regulation of interferon-beta production	10	41	0.77	0.77	0.00029	9606.ENSP00000220751,9606.ENSP00000248244,9606.ENSP00000260010,9606.ENSP00000329967,9606.ENSP00000335153,9606.ENSP00000353874,9606.ENSP00000363089,9606.ENSP00000380697,9606.ENSP00000401980,9606.ENSP00000489597	RIPK2,TICAM1,TLR2,TBK1,HSP90AA1,TLR9,TLR4,IRF7,MAVS,PTPN11
GO:0032729	Positive regulation of interferon-gamma production	20	78	0.79	1.38	2.92e-08	9606.ENSP00000220751,9606.ENSP00000226730,9606.ENSP00000228534,9606.ENSP00000231228,9606.ENSP00000262345,9606.ENSP00000264316,9606.ENSP00000284981,9606.ENSP00000303231,9606.ENSP00000321345,9606.ENSP00000340019,9606.ENSP00000353874,9606.ENSP00000363089,9606.ENSP00000371067,9606.ENSP00000379873,9606.ENSP00000385519,9606.ENSP00000386380,9606.ENSP00000398698,9606.ENSP00000407586,9606.ENSP00000431885,…	RIPK2,IL2,IL23A,IL12B,IL12RB2,TXK,APP,IL12A,IL23R,HSPD1,TLR9,TLR4,JAK2,HLA-A,CD14,IL1R1,TNF,HRAS,TYK2,IL12RB1
GO:0032733	Positive regulation of interleukin-10 production	8	40	0.77	0.62	0.0018	TLR2,CD28,HSPD1,TLR9,TLR4,SYK,PRKCZ,PLCG2
GO:0032733	Positive regulation of interleukin-10 production	12	40	0.86	1.07	9.59e-06	9606.ENSP00000228534,9606.ENSP00000231228,9606.ENSP00000260010,9606.ENSP00000264657,9606.ENSP00000313875,9606.ENSP00000324890,9606.ENSP00000340019,9606.ENSP00000353874,9606.ENSP00000363089,9606.ENSP00000364898,9606.ENSP00000367830,9606.ENSP00000482457	IL23A,IL12B,TLR2,STAT3,CD46,CD28,HSPD1,TLR9,TLR4,SYK,PRKCZ,PLCG2
GO:0032735	Positive regulation of interleukin-12 production	13	43	0.94	1.31	5.75e-07	RIPK2,MAPK14,TLR2,MAPK11,HSPD1,TLR9,TLR4,AGER,SYK,TIRAP,RELA,TRAF6,PLCG2
GO:0032735	Positive regulation of interleukin-12 production	15	43	0.93	1.43	1.01e-07	9606.ENSP00000220751,9606.ENSP00000228534,9606.ENSP00000229795,9606.ENSP00000231228,9606.ENSP00000260010,9606.ENSP00000321345,9606.ENSP00000333685,9606.ENSP00000340019,9606.ENSP00000353874,9606.ENSP00000363089,9606.ENSP00000364898,9606.ENSP00000376445,9606.ENSP00000384273,9606.ENSP00000433623,9606.ENSP00000482457	RIPK2,IL23A,MAPK14,IL12B,TLR2,IL23R,MAPK11,HSPD1,TLR9,TLR4,SYK,TIRAP,RELA,TRAF6,PLCG2
GO:0032740	Positive regulation of interleukin-17 production	6	28	0.8	0.51	0.0074	IL2,PRKCQ,CARD9,JAK2,BTK,MYD88
GO:0032740	Positive regulation of interleukin-17 production	12	28	1.02	1.37	4.99e-07	9606.ENSP00000221930,9606.ENSP00000226730,9606.ENSP00000228534,9606.ENSP00000231228,9606.ENSP00000263125,9606.ENSP00000321345,9606.ENSP00000360797,9606.ENSP00000371067,9606.ENSP00000431885,9606.ENSP00000470788,9606.ENSP00000483570,9606.ENSP00000498321	TGFB1,IL2,IL23A,IL12B,PRKCQ,IL23R,CARD9,JAK2,TYK2,IL12RB1,BTK,MYD88
GO:0032741	Positive regulation of interleukin-18 production	3	8	0.96	0.34	0.0453	9606.ENSP00000260010,9606.ENSP00000353874,9606.ENSP00000398698	TLR2,TLR9,TNF
GO:0032743	Positive regulation of interleukin-2 production	8	36	0.81	0.68	0.0010	RIPK2,TRAF2,PRKCQ,CD28,MAP3K7,TRAF6,PLCG2,MALT1
GO:0032743	Positive regulation of interleukin-2 production	9	36	0.78	0.72	0.00057	9606.ENSP00000220751,9606.ENSP00000247668,9606.ENSP00000263125,9606.ENSP00000324890,9606.ENSP00000358335,9606.ENSP00000393978,9606.ENSP00000433623,9606.ENSP00000482457,9606.ENSP00000497997	RIPK2,TRAF2,PRKCQ,CD28,MAP3K7,PRKD2,TRAF6,PLCG2,MALT1
GO:0032753	Positive regulation of interleukin-4 production	6	27	0.81	0.52	0.0064	RARA,PRKCQ,FCER1G,CD28,SYK,PRKCZ
GO:0032755	Positive regulation of interleukin-6 production	22	98	0.82	1.54	1.82e-09	MAPK13,RIPK2,TICAM1,TLR2,CYBA,HSPD1,TLR9,ARHGEF2,TLR1,CARD9,TLR4,AGER,SYK,TIRAP,TLR6,MAVS,TRAF6,PLCG2,BTK,PTPN11,BCL10,MYD88
GO:0032755	Positive regulation of interleukin-6 production	27	98	0.82	1.8	1.31e-11	9606.ENSP00000211287,9606.ENSP00000220751,9606.ENSP00000248244,9606.ENSP00000260010,9606.ENSP00000261623,9606.ENSP00000264657,9606.ENSP00000284981,9606.ENSP00000302924,9606.ENSP00000321326,9606.ENSP00000327251,9606.ENSP00000340019,9606.ENSP00000353874,9606.ENSP00000354932,9606.ENSP00000357470,9606.ENSP00000360797,9606.ENSP00000363089,9606.ENSP00000364898,9606.ENSP00000376445,9606.ENSP00000389600,…	MAPK13,RIPK2,TICAM1,TLR2,CYBA,STAT3,APP,IL17D,F2R,NOS2,HSPD1,TLR9,TLR1,IL6R,CARD9,TLR4,SYK,TIRAP,TLR6,TNF,MAVS,TRAF6,PLCG2,BTK,PTPN11,BCL10,MYD88
GO:0032757	Positive regulation of interleukin-8 production	15	65	0.83	1.19	1.03e-06	LAMTOR5,RIPK1,TLR2,TLR9,TLR1,TLR4,SYK,TIRAP,RELA,CD14,MAVS,DDIT3,TLR5,BCL10,MYD88
GO:0032757	Positive regulation of interleukin-8 production	21	65	0.89	1.73	3.79e-10	9606.ENSP00000223095,9606.ENSP00000259808,9606.ENSP00000260010,9606.ENSP00000264657,9606.ENSP00000302924,9606.ENSP00000321326,9606.ENSP00000327251,9606.ENSP00000353874,9606.ENSP00000354932,9606.ENSP00000363089,9606.ENSP00000364898,9606.ENSP00000376445,9606.ENSP00000384273,9606.ENSP00000385519,9606.ENSP00000393978,9606.ENSP00000398698,9606.ENSP00000401980,9606.ENSP00000448665,9606.ENSP00000496355,…	SERPINE1,RIPK1,TLR2,STAT3,IL17D,F2R,NOS2,TLR9,TLR1,TLR4,SYK,TIRAP,RELA,CD14,PRKD2,TNF,MAVS,DDIT3,TLR5,BCL10,MYD88
GO:0032760	Positive regulation of tumor necrosis factor production	27	101	0.89	2.04	4.86e-13	RIPK2,TICAM1,RIPK1,TLR2,CYBA,LY96,LRRK2,RASGRP1,TLR9,ARHGEF2,TLR1,MAPKAPK2,IFNGR1,CARD9,TLR4,AGER,SYK,CYBB,JAK2,TIRAP,CD14,MAVS,PIK3R1,PLCG2,BTK,PTPN11,MYD88
GO:0032760	Positive regulation of tumor necrosis factor production	28	101	0.83	1.85	4.46e-12	9606.ENSP00000220751,9606.ENSP00000228534,9606.ENSP00000231228,9606.ENSP00000248244,9606.ENSP00000259808,9606.ENSP00000260010,9606.ENSP00000260356,9606.ENSP00000261623,9606.ENSP00000264657,9606.ENSP00000284818,9606.ENSP00000284981,9606.ENSP00000326366,9606.ENSP00000353874,9606.ENSP00000354932,9606.ENSP00000356070,9606.ENSP00000356713,9606.ENSP00000360797,9606.ENSP00000363089,9606.ENSP00000364898,…	RIPK2,IL23A,IL12B,TICAM1,RIPK1,TLR2,THBS1,CYBA,STAT3,LY96,APP,PSEN1,TLR9,TLR1,MAPKAPK2,IFNGR1,CARD9,TLR4,SYK,JAK2,TIRAP,CD14,MAVS,PIK3R1,PLCG2,BTK,PTPN11,MYD88
GO:0032765	Positive regulation of mast cell cytokine production	3	4	1.34	0.52	0.0102	KIT,SYK,BCL10
GO:0032765	Positive regulation of mast cell cytokine production	3	4	1.26	0.49	0.0129	9606.ENSP00000288135,9606.ENSP00000364898,9606.ENSP00000498104	KIT,SYK,BCL10
GO:0032768	Regulation of monooxygenase activity	10	52	0.75	0.73	0.00045	NFKB1,EGFR,CALM3,ATP2B4,PTK2B,ESR1,AKT1,CALM1,CALM2,PIK3CB
GO:0032768	Regulation of monooxygenase activity	15	52	0.84	1.23	7.24e-07	9606.ENSP00000226574,9606.ENSP00000252486,9606.ENSP00000275493,9606.ENSP00000291295,9606.ENSP00000350310,9606.ENSP00000360973,9606.ENSP00000380638,9606.ENSP00000398698,9606.ENSP00000405330,9606.ENSP00000437955,9606.ENSP00000451828,9606.ENSP00000499717,9606.ENSP00000499797,9606.ENSP00000500990,9606.ENSP00000501150	NFKB1,APOE,EGFR,CALM3,ATP2B4,AGTR2,PTK2B,TNF,ESR1,HIF1A,AKT1,CALM1,CALM2,SNCA,PIK3CB
GO:0032793	Positive regulation of CREB transcription factor activity	4	18	0.81	0.35	0.0390	ADCY8,ADCY1,RPS6KA4,RPS6KA5
GO:0032793	Positive regulation of CREB transcription factor activity	8	18	1.03	0.99	5.98e-05	9606.ENSP00000286355,9606.ENSP00000297323,9606.ENSP00000333896,9606.ENSP00000357622,9606.ENSP00000390535,9606.ENSP00000393098,9606.ENSP00000393978,9606.ENSP00000479667	ADCY8,ADCY1,RPS6KA4,CRTC2,PRKD1,LPAR5,PRKD2,RPS6KA5
GO:0032811	Negative regulation of epinephrine secretion	3	5	1.16	0.44	0.0192	9606.ENSP00000280155,9606.ENSP00000386069,9606.ENSP00000480573	ADRA2A,ADRA2C,ADRA2B
GO:0032814	Regulation of natural killer cell activation	11	46	0.76	0.82	0.00014	9606.ENSP00000228534,9606.ENSP00000231228,9606.ENSP00000248244,9606.ENSP00000254337,9606.ENSP00000262345,9606.ENSP00000303231,9606.ENSP00000321345,9606.ENSP00000363117,9606.ENSP00000371067,9606.ENSP00000431885,9606.ENSP00000470788	IL23A,IL12B,TICAM1,DCAF15,IL12RB2,IL12A,IL23R,FGR,JAK2,TYK2,IL12RB1
GO:0032816	Positive regulation of natural killer cell activation	9	28	0.89	0.88	0.00012	9606.ENSP00000228534,9606.ENSP00000231228,9606.ENSP00000248244,9606.ENSP00000262345,9606.ENSP00000303231,9606.ENSP00000321345,9606.ENSP00000371067,9606.ENSP00000431885,9606.ENSP00000470788	IL23A,IL12B,TICAM1,IL12RB2,IL12A,IL23R,JAK2,TYK2,IL12RB1
GO:0032819	Positive regulation of natural killer cell proliferation	8	13	1.17	1.18	1.08e-05	9606.ENSP00000228534,9606.ENSP00000231228,9606.ENSP00000262345,9606.ENSP00000303231,9606.ENSP00000321345,9606.ENSP00000371067,9606.ENSP00000431885,9606.ENSP00000470788	IL23A,IL12B,IL12RB2,IL12A,IL23R,JAK2,TYK2,IL12RB1
GO:0032847	Regulation of cellular pH reduction	4	8	1.08	0.54	0.0070	9606.ENSP00000299178,9606.ENSP00000356094,9606.ENSP00000369647,9606.ENSP00000381185	AVPR1A,AVPR1B,AVP,BCL2
GO:0032849	Positive regulation of cellular pH reduction	3	6	1.08	0.4	0.0263	9606.ENSP00000299178,9606.ENSP00000356094,9606.ENSP00000369647	AVPR1A,AVPR1B,AVP
GO:0032868	Response to insulin	41	205	0.77	2.01	6.21e-16	KCNQ1,PIK3R2,RPS6KB1,MAPK14,SESN2,TLR2,PIK3R3,GAB1,EEF2K,PIK3CA,SLC9A1,PIK3C2A,RB1,PPARG,PRKCI,INPPL1,INSR,IRS1,SP1,PDPK1,MAX,MTOR,RAB13,IRS4,EIF4EBP2,SRC,OGT,FOXO4,PFKFB1,IRS2,PRKCZ,FOXO1,AKT2,GRB2,PPARA,SHC1,PIK3R1,LYN,CPEB2,AKT1,IGF1R
GO:0032869	Cellular response to insulin stimulus	30	148	0.77	1.71	7.72e-12	PIK3R2,RPS6KB1,PIK3R3,GAB1,EEF2K,PIK3CA,SLC9A1,PIK3C2A,RB1,PPARG,PRKCI,INSR,IRS1,SP1,PDPK1,RAB13,IRS4,EIF4EBP2,SRC,FOXO4,IRS2,PRKCZ,FOXO1,AKT2,GRB2,SHC1,PIK3R1,CPEB2,AKT1,IGF1R
GO:0032869	Cellular response to insulin stimulus	35	148	0.76	1.83	2.72e-13	9606.ENSP00000222254,9606.ENSP00000222330,9606.ENSP00000225577,9606.ENSP00000257430,9606.ENSP00000257904,9606.ENSP00000262741,9606.ENSP00000262995,9606.ENSP00000263026,9606.ENSP00000263967,9606.ENSP00000263980,9606.ENSP00000282096,9606.ENSP00000287820,9606.ENSP00000295797,9606.ENSP00000303830,9606.ENSP00000304895,9606.ENSP00000311857,9606.ENSP00000324806,9606.ENSP00000329357,9606.ENSP00000344220,…	PIK3R2,GSK3A,RPS6KB1,APC,CDK4,PIK3R3,GAB1,EEF2K,PIK3CA,SLC9A1,PDE3B,PPARG,PRKCI,INSR,IRS1,PTPN2,GSK3B,SP1,PDPK1,STAT1,RAB13,IRS4,EIF4EBP2,SRC,FOXO4,IRS2,TBC1D4,PRKCZ,FOXO1,AKT2,SHC1,TRIB3,PIK3R1,AKT1,IGF1R
GO:0032872	Regulation of stress-activated MAPK cascade	40	189	0.79	2.09	2.93e-16	GADD45B,MAPK1,RIPK2,DUSP3,DUSP1,TRAF2,GADD45G,RIPK1,TRAF5,MAP2K2,MAPK3,MECOM,NCOR1,EGFR,NCF1,DUSP16,CRK,MAP2K1,RASGRP1,EZR,DLG1,MAP3K5,TLR9,DUSP10,GADD45A,CARD9,NOX1,TLR4,IGBP1,AGER,FOXO1,TIRAP,TRAF3,PTK2B,MAP2K7,HRAS,MAP2K4,TRAF6,IGF1R,MYD88
GO:0032873	Negative regulation of stress-activated MAPK cascade	10	49	0.77	0.77	0.00030	DUSP3,DUSP1,MECOM,NCOR1,DUSP16,EZR,DLG1,DUSP10,IGBP1,FOXO1
GO:0032885	Regulation of polysaccharide biosynthetic process	9	36	0.78	0.72	0.00057	9606.ENSP00000221930,9606.ENSP00000222330,9606.ENSP00000226574,9606.ENSP00000303830,9606.ENSP00000304895,9606.ENSP00000324806,9606.ENSP00000365016,9606.ENSP00000375892,9606.ENSP00000451828	TGFB1,GSK3A,NFKB1,INSR,IRS1,GSK3B,IRS2,AKT2,AKT1
GO:0032890	Regulation of organic acid transport	17	74	0.75	1.11	1.51e-06	9606.ENSP00000260356,9606.ENSP00000262461,9606.ENSP00000299178,9606.ENSP00000326366,9606.ENSP00000355627,9606.ENSP00000356094,9606.ENSP00000364898,9606.ENSP00000365016,9606.ENSP00000369647,9606.ENSP00000375892,9606.ENSP00000379350,9606.ENSP00000385523,9606.ENSP00000389326,9606.ENSP00000398698,9606.ENSP00000451828,9606.ENSP00000468348,9606.ENSP00000500990	THBS1,SLC12A2,AVPR1A,PSEN1,AGT,AVPR1B,SYK,IRS2,AVP,AKT2,ITGB1,PPARA,ACE2,TNF,AKT1,MAP2K6,SNCA
GO:0032930	Positive regulation of superoxide anion generation	9	20	1.12	1.24	4.81e-06	CYBA,GNAI2,PRKCD,MAPT,AGT,GNAI3,SYK,ITGB2,ITGAM
GO:0032930	Positive regulation of superoxide anion generation	10	20	1.08	1.29	2.14e-06	9606.ENSP00000221930,9606.ENSP00000261623,9606.ENSP00000284981,9606.ENSP00000312999,9606.ENSP00000331602,9606.ENSP00000355627,9606.ENSP00000358867,9606.ENSP00000364898,9606.ENSP00000380948,9606.ENSP00000496959	TGFB1,CYBA,APP,GNAI2,PRKCD,AGT,GNAI3,SYK,ITGB2,ITGAM
GO:0032943	Mononuclear cell proliferation	25	128	0.76	1.48	1.29e-09	RIPK2,IL2,FLT3,TICAM1,PRKCQ,TP53,ERBB2,BAX,RASGRP1,CD19,CD28,TBK1,PRKCD,HSPD1,DLG1,FYN,PTEN,ADA,TLR4,BCL2L1,PTPN6,PIK3CG,RASSF5,MALT1,CBLB
GO:0032943	Mononuclear cell proliferation	32	128	0.78	1.83	9.91e-13	9606.ENSP00000220751,9606.ENSP00000221930,9606.ENSP00000226730,9606.ENSP00000228534,9606.ENSP00000231228,9606.ENSP00000241453,9606.ENSP00000248244,9606.ENSP00000263125,9606.ENSP00000269305,9606.ENSP00000269571,9606.ENSP00000293288,9606.ENSP00000313419,9606.ENSP00000324890,9606.ENSP00000329967,9606.ENSP00000331602,9606.ENSP00000340019,9606.ENSP00000345731,9606.ENSP00000346671,9606.ENSP00000353408,…	RIPK2,TGFB1,IL2,IL23A,IL12B,FLT3,TICAM1,PRKCQ,TP53,ERBB2,BAX,CD19,CD28,TBK1,PRKCD,HSPD1,DLG1,FYN,MSN,CR2,PTEN,ADA,CCND3,TLR4,BCL2L1,PPP3CB,BCL2,PTPN6,PIK3CG,RASSF5,MALT1,CBLB
GO:0032946	Positive regulation of mononuclear cell proliferation	35	150	0.75	1.81	3.75e-13	9606.ENSP00000220751,9606.ENSP00000226730,9606.ENSP00000228534,9606.ENSP00000231228,9606.ENSP00000248244,9606.ENSP00000262345,9606.ENSP00000263125,9606.ENSP00000264972,9606.ENSP00000294728,9606.ENSP00000303231,9606.ENSP00000313875,9606.ENSP00000315477,9606.ENSP00000321345,9606.ENSP00000324890,9606.ENSP00000353874,9606.ENSP00000359073,9606.ENSP00000361965,9606.ENSP00000363089,9606.ENSP00000364898,…	RIPK2,IL2,IL23A,IL12B,TICAM1,IL12RB2,PRKCQ,ZAP70,VCAM1,IL12A,CD46,CD209,IL23R,CD28,TLR9,VAV3,ADA,TLR4,SYK,IRS2,BCL2L1,IL6ST,JAK2,TIRAP,PPP3CA,NFATC2,HLA-A,BCL2,CDKN1A,TYK2,JAK3,TRAF6,IL12RB1,BTK,MYD88
GO:0032967	Positive regulation of collagen biosynthetic process	6	26	0.75	0.47	0.0100	9606.ENSP00000221930,9606.ENSP00000261799,9606.ENSP00000296585,9606.ENSP00000308541,9606.ENSP00000321326,9606.ENSP00000481956	TGFB1,PDGFRB,ITGA2,F2,F2R,CREB3L1
GO:0033045	Regulation of sister chromatid segregation	24	105	0.82	1.66	1.97e-10	DUSP1,DLGAP5,CCNB1,NDC80,ANAPC5,CENPE,RB1,NUF2,BUB1B,PLK1,BIRC5,BUB1,ANAPC2,ANAPC1,CDC16,UBE2C,CENPF,CDC20,CDC26,CDC23,ANAPC7,ANAPC4,CDC27,ACTB
GO:0033081	Regulation of T cell differentiation in thymus	6	28	0.8	0.51	0.0074	SOS2,ERBB2,RASGRP1,ADA,SOS1,CDKN2A
GO:0033129	Positive regulation of histone phosphorylation	3	5	1.24	0.47	0.0148	MAPK3,RPS6KA4,RPS6KA5
GO:0033129	Positive regulation of histone phosphorylation	3	5	1.16	0.44	0.0192	9606.ENSP00000263025,9606.ENSP00000333896,9606.ENSP00000479667	MAPK3,RPS6KA4,RPS6KA5
GO:0033131	Regulation of glucokinase activity	4	10	0.99	0.48	0.0122	9606.ENSP00000355865,9606.ENSP00000356047,9606.ENSP00000364145,9606.ENSP00000378040	PRKN,PFKFB2,PFKFB1,BAD
GO:0033133	Positive regulation of glucokinase activity	3	5	1.16	0.44	0.0192	9606.ENSP00000356047,9606.ENSP00000364145,9606.ENSP00000378040	PFKFB2,PFKFB1,BAD
GO:0033135	Regulation of peptidyl-serine phosphorylation	35	143	0.77	1.89	1.16e-13	9606.ENSP00000220751,9606.ENSP00000221930,9606.ENSP00000222330,9606.ENSP00000256460,9606.ENSP00000263967,9606.ENSP00000275493,9606.ENSP00000284981,9606.ENSP00000290277,9606.ENSP00000293288,9606.ENSP00000307272,9606.ENSP00000329967,9606.ENSP00000335153,9606.ENSP00000343223,9606.ENSP00000346148,9606.ENSP00000348089,9606.ENSP00000350310,9606.ENSP00000358488,9606.ENSP00000360609,9606.ENSP00000361021,…	RIPK2,TGFB1,GSK3A,CAMK1,PIK3CA,EGFR,APP,ARAF,BAX,RPTOR,TBK1,HSP90AA1,TCL1B,PRKAA1,ERCC6,ATP2B4,MTCP1,HSP90AB1,PTEN,STK4,BAK1,AVP,BCL2,PRKD1,PRKD2,RAPGEF3,TNF,RAF1,BRAF,BDKRB2,TCL1A,AKT1,NOS1,INPP5F,SNCA
GO:0033138	Positive regulation of peptidyl-serine phosphorylation	29	110	0.8	1.81	4.79e-12	9606.ENSP00000220751,9606.ENSP00000221930,9606.ENSP00000222330,9606.ENSP00000256460,9606.ENSP00000263967,9606.ENSP00000275493,9606.ENSP00000284981,9606.ENSP00000290277,9606.ENSP00000307272,9606.ENSP00000329967,9606.ENSP00000335153,9606.ENSP00000343223,9606.ENSP00000348089,9606.ENSP00000350310,9606.ENSP00000358488,9606.ENSP00000360609,9606.ENSP00000361892,9606.ENSP00000369647,9606.ENSP00000381185,…	RIPK2,TGFB1,GSK3A,CAMK1,PIK3CA,EGFR,APP,ARAF,RPTOR,TBK1,HSP90AA1,TCL1B,ERCC6,ATP2B4,MTCP1,HSP90AB1,STK4,AVP,BCL2,PRKD1,PRKD2,RAPGEF3,TNF,RAF1,BRAF,TCL1A,AKT1,NOS1,SNCA
GO:0033173	calcineurin-NFAT signaling cascade	5	15	0.99	0.59	0.0041	NFATC3,MTOR,PPP3CA,NFATC2,NFATC1
GO:0033173	calcineurin-NFAT signaling cascade	7	15	1.05	0.9	0.00017	9606.ENSP00000300659,9606.ENSP00000354558,9606.ENSP00000378306,9606.ENSP00000378323,9606.ENSP00000379330,9606.ENSP00000380878,9606.ENSP00000389377	NFATC3,MTOR,PPP3CB,PPP3CA,NFATC2,PPP3CC,NFATC1
GO:0033194	Response to hydroperoxide	4	16	0.86	0.39	0.0284	SP1,PRKCD,JAK2,DAPK1
GO:0033194	Response to hydroperoxide	5	16	0.88	0.51	0.0083	9606.ENSP00000329357,9606.ENSP00000331602,9606.ENSP00000371067,9606.ENSP00000386135,9606.ENSP00000390535	SP1,PRKCD,JAK2,DAPK1,PRKD1
GO:0033209	Tumor necrosis factor-mediated signaling pathway	17	56	0.95	1.63	5.20e-09	NFKBIA,TRAF2,ACTN4,RIPK1,TRAF5,TP53,FOXO3,TRADD,CHUK,RRAGA,JAK2,TRAF3,ILK,PTK2B,RELA,IKBKB,TRAF6
GO:0033209	Tumor necrosis factor-mediated signaling pathway	20	56	0.94	1.8	2.65e-10	9606.ENSP00000162749,9606.ENSP00000216797,9606.ENSP00000247668,9606.ENSP00000252699,9606.ENSP00000259808,9606.ENSP00000261464,9606.ENSP00000269305,9606.ENSP00000339527,9606.ENSP00000341268,9606.ENSP00000354394,9606.ENSP00000359424,9606.ENSP00000369899,9606.ENSP00000371067,9606.ENSP00000376500,9606.ENSP00000379975,9606.ENSP00000380638,9606.ENSP00000384273,9606.ENSP00000398698,9606.ENSP00000430684,…	TNFRSF1A,NFKBIA,TRAF2,ACTN4,RIPK1,TRAF5,TP53,FOXO3,TRADD,STAT1,CHUK,RRAGA,JAK2,TRAF3,ILK,PTK2B,RELA,TNF,IKBKB,TRAF6
GO:0033239	Negative regulation of cellular amine metabolic process	3	5	1.24	0.47	0.0148	ATP2B4,ITGB2,ITGAM
GO:0033239	Negative regulation of cellular amine metabolic process	3	5	1.16	0.44	0.0192	9606.ENSP00000350310,9606.ENSP00000380948,9606.ENSP00000496959	ATP2B4,ITGB2,ITGAM
GO:0033277	Abortive mitotic cell cycle	2	2	1.46	0.36	0.0445	PTPN6,PTPN11
GO:0033277	Abortive mitotic cell cycle	2	2	1.38	0.35	0.0489	9606.ENSP00000391592,9606.ENSP00000489597	PTPN6,PTPN11
GO:0033327	Leydig cell differentiation	4	12	0.99	0.47	0.0134	CCND1,PDGFRA,NR5A1,AR
GO:0033327	Leydig cell differentiation	4	12	0.91	0.43	0.0192	9606.ENSP00000227507,9606.ENSP00000257290,9606.ENSP00000362690,9606.ENSP00000363822	CCND1,PDGFRA,NR5A1,AR
GO:0033574	Response to testosterone	14	42	0.91	1.31	4.72e-07	9606.ENSP00000225577,9606.ENSP00000260356,9606.ENSP00000264033,9606.ENSP00000317985,9606.ENSP00000320866,9606.ENSP00000353408,9606.ENSP00000363822,9606.ENSP00000366182,9606.ENSP00000369647,9606.ENSP00000370253,9606.ENSP00000378040,9606.ENSP00000378517,9606.ENSP00000393333,9606.ENSP00000497069	RPS6KB1,THBS1,CBL,ROCK2,CALR,MSN,AR,ELK1,AVP,NKX3-1,BAD,SPP1,TBXA2R,IGF1R
GO:0033598	Mammary gland epithelial cell proliferation	5	15	0.99	0.59	0.0041	MAPK1,CCND1,MED1,BTRC,ESR1
GO:0033598	Mammary gland epithelial cell proliferation	5	15	0.91	0.53	0.0068	9606.ENSP00000215832,9606.ENSP00000227507,9606.ENSP00000300134,9606.ENSP00000300651,9606.ENSP00000405330	MAPK1,CCND1,STAT6,MED1,ESR1
GO:0033623	Regulation of integrin activation	4	17	0.84	0.37	0.0336	RAP1B,FARP2,KIF14,SRC
GO:0033627	Cell adhesion mediated by integrin	18	42	1.1	2.16	1.77e-11	ITGB4,ITGB8,ITGAV,ITGA2B,ITGB7,ITGB6,ITGA5,ITGB5,ITGA2,ITGA3,ITGA11,ITGAL,ITGA10,ITGB1,ITGA4,ITGB2,ITGB3,ITGAM
GO:0033627	Cell adhesion mediated by integrin	22	42	1.1	2.52	7.04e-14	9606.ENSP00000200181,9606.ENSP00000222573,9606.ENSP00000226218,9606.ENSP00000261023,9606.ENSP00000262407,9606.ENSP00000264741,9606.ENSP00000267082,9606.ENSP00000282588,9606.ENSP00000283249,9606.ENSP00000293379,9606.ENSP00000296181,9606.ENSP00000296585,9606.ENSP00000315190,9606.ENSP00000327290,9606.ENSP00000349252,9606.ENSP00000358310,9606.ENSP00000367316,9606.ENSP00000379350,9606.ENSP00000380227,…	ITGB4,ITGB8,VTN,ITGAV,ITGA2B,ITGA9,ITGB7,ITGA1,ITGB6,ITGA5,ITGB5,ITGA2,ITGA3,ITGA11,ITGAL,ITGA10,ITGA8,ITGB1,ITGA4,ITGB2,ITGB3,ITGAM
GO:0033628	Regulation of cell adhesion mediated by integrin	12	49	0.85	1.05	1.13e-05	CRK,RAC3,PTK2,CRKL,DPP4,ADA,SYK,PTPN6,PIK3CG,LYN,ITGB3,PTPN11
GO:0033628	Regulation of cell adhesion mediated by integrin	14	49	0.84	1.16	2.11e-06	9606.ENSP00000223095,9606.ENSP00000282096,9606.ENSP00000300574,9606.ENSP00000304283,9606.ENSP00000341189,9606.ENSP00000346300,9606.ENSP00000353731,9606.ENSP00000361965,9606.ENSP00000364898,9606.ENSP00000391592,9606.ENSP00000419260,9606.ENSP00000428924,9606.ENSP00000452786,9606.ENSP00000489597	SERPINE1,PDE3B,CRK,RAC3,PTK2,CRKL,DPP4,ADA,SYK,PTPN6,PIK3CG,LYN,ITGB3,PTPN11
GO:0033631	Cell-cell adhesion mediated by integrin	3	6	1.16	0.44	0.0206	ITGA5,ITGB1,ITGA4
GO:0033631	Cell-cell adhesion mediated by integrin	3	6	1.08	0.4	0.0263	9606.ENSP00000293379,9606.ENSP00000379350,9606.ENSP00000380227	ITGA5,ITGB1,ITGA4
GO:0033674	Positive regulation of kinase activity	108	494	0.8	3.19	2.18e-46	TAB1,IL2,CCND1,CDKN1B,SLC8A2,FLT3,CDC25B,TRAF2,CCNB1,CAMK1,PDGFRA,SPDYE1,PDGFRB,TELO2,MAP2K2,NOX4,KDR,PIK3CA,RAPGEF2,CENPE,DAXX,ERBB3,IQGAP1,ERBB2,EGFR,ADCY8,PRKAG2,KIT,NCF1,CALM3,FGFR4,LRRK2,TPX2,MAP2K1,INSR,IRS1,RPTOR,RASGRP1,CKS1B,CD19,MET,PRKAG1,SPDYE3,PRKCD,HSP90AA1,SPDYA,FGFR3,MAPT,PTK2,ERBB4,PDPK1,MAP2K3,DLG1,ATP2B4,MAP3K5,TLR9,MTOR,AGT,KIF14,TAB2,MAP3K7,RAP1A,IRAK1,VAV3,DAB1,VAV2,SRC,TLR4…
GO:0033674	Positive regulation of kinase activity	115	494	0.75	2.93	6.24e-44	9606.ENSP00000216160,9606.ENSP00000221930,9606.ENSP00000226730,9606.ENSP00000227507,9606.ENSP00000228534,9606.ENSP00000228872,9606.ENSP00000231228,9606.ENSP00000236877,9606.ENSP00000241453,9606.ENSP00000245960,9606.ENSP00000247668,9606.ENSP00000256460,9606.ENSP00000257290,9606.ENSP00000260356,9606.ENSP00000261254,9606.ENSP00000261799,9606.ENSP00000262948,9606.ENSP00000263923,9606.ENSP00000263967,…	TAB1,TGFB1,IL2,CCND1,IL23A,CDKN1B,IL12B,SLC8A2,FLT3,CDC25B,TRAF2,CAMK1,PDGFRA,THBS1,CCND2,PDGFRB,MAP2K2,KDR,PIK3CA,DAXX,ERBB3,IQGAP1,ERBB2,EGFR,ADRA2A,FLT1,APP,ADCY8,PRKAG2,KIT,CALM3,MAP2K1,INSR,IRS1,RPTOR,F2,CD19,MET,IL23R,PRKAG1,PSEN1,PRKCD,HSP90AA1,PTK2,ERBB4,TCL1B,PDPK1,MAP2K3,DLG1,COPS8,ERCC6,ATP2B4,MAP3K5,TLR9,MTOR,AKAP13,AGT,PFKFB2,TAB2,IL6R,MAP3K7,MTCP1,RAP1A,IRAK1,VAV3,DAB1,HSP90AB1,VAV2…
GO:0033688	Regulation of osteoblast proliferation	6	28	0.8	0.51	0.0074	ITGAV,SMAD3,RHOA,FGFR2,ITGB3,IGF1R
GO:0033688	Regulation of osteoblast proliferation	8	28	0.84	0.73	0.00065	9606.ENSP00000239462,9606.ENSP00000261023,9606.ENSP00000332973,9606.ENSP00000381185,9606.ENSP00000384262,9606.ENSP00000400175,9606.ENSP00000452786,9606.ENSP00000497069	TNN,ITGAV,SMAD3,BCL2,HPSE,RHOA,ITGB3,IGF1R
GO:0033690	Positive regulation of osteoblast proliferation	4	13	0.87	0.4	0.0237	9606.ENSP00000261023,9606.ENSP00000384262,9606.ENSP00000452786,9606.ENSP00000497069	ITGAV,HPSE,ITGB3,IGF1R
GO:0033693	Neurofilament bundle assembly	3	3	1.38	0.54	0.0082	9606.ENSP00000221166,9606.ENSP00000311997,9606.ENSP00000482169	NEFM,NEFH,NEFL
GO:0033700	Phospholipid efflux	4	12	0.91	0.43	0.0192	9606.ENSP00000252486,9606.ENSP00000445002,9606.ENSP00000465356,9606.ENSP00000466775	APOE,APOA5,APOC1,APOC2
GO:0033762	Response to glucagon	5	20	0.86	0.48	0.0106	RPS6KB1,ADCY8,PFKFB1,CREB1,CCNA2
GO:0033864	Positive regulation of NAD(P)H oxidase activity	4	7	1.22	0.63	0.0034	CYBA,GNAI2,AGT,GNAI3
GO:0033864	Positive regulation of NAD(P)H oxidase activity	5	7	1.24	0.81	0.00060	9606.ENSP00000261623,9606.ENSP00000312999,9606.ENSP00000355627,9606.ENSP00000358867,9606.ENSP00000398832	CYBA,GNAI2,AGT,GNAI3,AGTR1
GO:0034105	Positive regulation of tissue remodeling	4	11	1.03	0.5	0.0107	IL2,ROCK2,PPP3CA,ROCK1
GO:0034105	Positive regulation of tissue remodeling	6	11	1.12	0.84	0.00035	9606.ENSP00000226730,9606.ENSP00000228534,9606.ENSP00000231228,9606.ENSP00000317985,9606.ENSP00000378323,9606.ENSP00000382697	IL2,IL23A,IL12B,ROCK2,PPP3CA,ROCK1
GO:0034109	Homotypic cell-cell adhesion	12	60	0.77	0.88	6.21e-05	VCL,PDGFRA,TLN1,FN1,ILK,CTNNA3,PTPN6,PIK3CG,ITGB3,ACTG1,ACTB,PIK3CB
GO:0034110	Regulation of homotypic cell-cell adhesion	9	38	0.84	0.8	0.00028	PRKCQ,PRKCD,PRKG1,SYK,IL6ST,JAK2,PRKCA,LYN,JAK1
GO:0034110	Regulation of homotypic cell-cell adhesion	11	38	0.85	0.97	3.33e-05	9606.ENSP00000263125,9606.ENSP00000331602,9606.ENSP00000357470,9606.ENSP00000363092,9606.ENSP00000364898,9606.ENSP00000370698,9606.ENSP00000371067,9606.ENSP00000408695,9606.ENSP00000428924,9606.ENSP00000496414,9606.ENSP00000499900	PRKCQ,PRKCD,IL6R,PRKG1,SYK,IL6ST,JAK2,PRKCA,LYN,RDX,JAK1
GO:0034112	Positive regulation of homotypic cell-cell adhesion	4	17	0.76	0.33	0.0473	9606.ENSP00000357470,9606.ENSP00000370698,9606.ENSP00000371067,9606.ENSP00000499900	IL6R,IL6ST,JAK2,JAK1
GO:0034113	Heterotypic cell-cell adhesion	9	36	0.86	0.83	0.00020	ITGAV,ITGB7,ITGA5,PARVA,ITGB1,ITGA4,ITGB2,CTNNA3,ITGB3
GO:0034113	Heterotypic cell-cell adhesion	11	36	0.87	1.01	2.24e-05	9606.ENSP00000215637,9606.ENSP00000261023,9606.ENSP00000267082,9606.ENSP00000293379,9606.ENSP00000294728,9606.ENSP00000334008,9606.ENSP00000355361,9606.ENSP00000379350,9606.ENSP00000380227,9606.ENSP00000380948,9606.ENSP00000452786	MADCAM1,ITGAV,ITGB7,ITGA5,VCAM1,PARVA,CD47,ITGB1,ITGA4,ITGB2,ITGB3
GO:0034123	Positive regulation of toll-like receptor signaling pathway	8	29	0.91	0.81	0.00031	TLR2,CYBA,TLR9,TLR1,TIRAP,CD14,TICAM2,TLR5
GO:0034123	Positive regulation of toll-like receptor signaling pathway	8	29	0.82	0.71	0.00079	9606.ENSP00000260010,9606.ENSP00000261623,9606.ENSP00000353874,9606.ENSP00000354932,9606.ENSP00000376445,9606.ENSP00000385519,9606.ENSP00000415139,9606.ENSP00000496355	TLR2,CYBA,TLR9,TLR1,TIRAP,CD14,TICAM2,TLR5
GO:0034134	Toll-like receptor 2 signaling pathway	4	6	1.29	0.68	0.0023	RIPK2,TLR2,PIK3AP1,IRAK1
GO:0034134	Toll-like receptor 2 signaling pathway	4	6	1.21	0.62	0.0035	9606.ENSP00000220751,9606.ENSP00000260010,9606.ENSP00000339826,9606.ENSP00000358997	RIPK2,TLR2,PIK3AP1,IRAK1
GO:0034135	Regulation of toll-like receptor 2 signaling pathway	5	12	1.08	0.67	0.0020	CYBA,TLR1,TIRAP,TLR6,LYN
GO:0034135	Regulation of toll-like receptor 2 signaling pathway	5	12	1.0	0.61	0.0033	9606.ENSP00000261623,9606.ENSP00000354932,9606.ENSP00000376445,9606.ENSP00000389600,9606.ENSP00000428924	CYBA,TLR1,TIRAP,TLR6,LYN
GO:0034137	Positive regulation of toll-like receptor 2 signaling pathway	3	6	1.16	0.44	0.0206	CYBA,TLR1,TIRAP
GO:0034137	Positive regulation of toll-like receptor 2 signaling pathway	3	6	1.08	0.4	0.0263	9606.ENSP00000261623,9606.ENSP00000354932,9606.ENSP00000376445	CYBA,TLR1,TIRAP
GO:0034142	Toll-like receptor 4 signaling pathway	12	19	1.26	1.93	3.71e-09	NFKBIA,RIPK2,LY96,PRKCE,PIK3AP1,IRAK1,TLR4,TIRAP,CD14,TICAM2,LYN,TRIL
GO:0034142	Toll-like receptor 4 signaling pathway	12	19	1.18	1.73	2.15e-08	9606.ENSP00000216797,9606.ENSP00000220751,9606.ENSP00000284818,9606.ENSP00000306124,9606.ENSP00000339826,9606.ENSP00000358997,9606.ENSP00000363089,9606.ENSP00000376445,9606.ENSP00000385519,9606.ENSP00000415139,9606.ENSP00000428924,9606.ENSP00000479256	NFKBIA,RIPK2,LY96,PRKCE,PIK3AP1,IRAK1,TLR4,TIRAP,CD14,TICAM2,LYN,TRIL
GO:0034162	Toll-like receptor 9 signaling pathway	4	10	1.07	0.52	0.0084	PIK3AP1,TLR9,IRAK1,IRAK4
GO:0034162	Toll-like receptor 9 signaling pathway	4	10	0.99	0.48	0.0122	9606.ENSP00000339826,9606.ENSP00000353874,9606.ENSP00000358997,9606.ENSP00000479889	PIK3AP1,TLR9,IRAK1,IRAK4
GO:0034198	Cellular response to amino acid starvation	26	49	1.19	3.25	3.26e-18	MAPK1,ITFG2,NPRL2,SESN2,WDR59,RRAGB,MAPK3,ATF2,FLCN,WDR24,C12orf66,RNF152,ATF4,KPTN,MIOS,TFEB,MAP3K5,MTOR,RRAGD,RRAGC,RRAGA,MAPK8,SEH1L,SZT2,NPRL3,DEPDC5
GO:0034198	Cellular response to amino acid starvation	13	49	0.81	1.03	1.07e-05	9606.ENSP00000215832,9606.ENSP00000262850,9606.ENSP00000263025,9606.ENSP00000264110,9606.ENSP00000336790,9606.ENSP00000351908,9606.ENSP00000354558,9606.ENSP00000358423,9606.ENSP00000362092,9606.ENSP00000369899,9606.ENSP00000378974,9606.ENSP00000384849,9606.ENSP00000390535	MAPK1,RRAGB,MAPK3,ATF2,ATF4,MAP3K5,MTOR,RRAGD,RRAGC,RRAGA,MAPK8,CDKN1A,PRKD1
GO:0034351	Negative regulation of glial cell apoptotic process	4	9	1.11	0.56	0.0064	TRAF2,PRKCI,PRKCD,PRKCA
GO:0034351	Negative regulation of glial cell apoptotic process	4	9	1.03	0.51	0.0093	9606.ENSP00000247668,9606.ENSP00000295797,9606.ENSP00000331602,9606.ENSP00000408695	TRAF2,PRKCI,PRKCD,PRKCA
GO:0034369	Plasma lipoprotein particle remodeling	9	29	0.88	0.86	0.00015	9606.ENSP00000233242,9606.ENSP00000252486,9606.ENSP00000264005,9606.ENSP00000274793,9606.ENSP00000355627,9606.ENSP00000398832,9606.ENSP00000445002,9606.ENSP00000465356,9606.ENSP00000466775	APOB,APOE,LCAT,PLA2G7,AGT,AGTR1,APOA5,APOC1,APOC2
GO:0034372	Very-low-density lipoprotein particle remodeling	4	9	1.03	0.51	0.0093	9606.ENSP00000252486,9606.ENSP00000264005,9606.ENSP00000445002,9606.ENSP00000466775	APOE,LCAT,APOA5,APOC2
GO:0034374	Low-density lipoprotein particle remodeling	5	16	0.88	0.51	0.0083	9606.ENSP00000233242,9606.ENSP00000252486,9606.ENSP00000274793,9606.ENSP00000355627,9606.ENSP00000398832	APOB,APOE,PLA2G7,AGT,AGTR1
GO:0034377	Plasma lipoprotein particle assembly	8	23	0.93	0.84	0.00023	9606.ENSP00000233242,9606.ENSP00000252486,9606.ENSP00000261407,9606.ENSP00000309591,9606.ENSP00000359719,9606.ENSP00000366488,9606.ENSP00000445002,9606.ENSP00000465356	APOB,APOE,LPCAT3,PRKACA,PRKACB,PRKACG,APOA5,APOC1
GO:0034380	High-density lipoprotein particle assembly	5	12	1.0	0.61	0.0033	9606.ENSP00000252486,9606.ENSP00000309591,9606.ENSP00000359719,9606.ENSP00000366488,9606.ENSP00000445002	APOE,PRKACA,PRKACB,PRKACG,APOA5
GO:0034382	Chylomicron remnant clearance	3	5	1.16	0.44	0.0192	9606.ENSP00000252486,9606.ENSP00000465356,9606.ENSP00000466775	APOE,APOC1,APOC2
GO:0034393	Positive regulation of smooth muscle cell apoptotic process	4	12	0.99	0.47	0.0134	PPARG,ATF4,MAP2K4,CDKN2A
GO:0034393	Positive regulation of smooth muscle cell apoptotic process	6	12	1.08	0.81	0.00048	9606.ENSP00000231228,9606.ENSP00000287820,9606.ENSP00000303231,9606.ENSP00000336790,9606.ENSP00000410402,9606.ENSP00000418915	IL12B,PPARG,IL12A,ATF4,MAP2K4,CDKN2A
GO:0034446	Substrate adhesion-dependent cell spreading	14	58	0.85	1.17	1.72e-06	ITGAV,ITGB7,PXN,PARVA,FN1,KIF14,SRC,ILK,ITGA4,PARVB,RHOA,BRAF,PIK3R1,ITGB3
GO:0034446	Substrate adhesion-dependent cell spreading	15	58	0.8	1.13	2.26e-06	9606.ENSP00000258341,9606.ENSP00000261023,9606.ENSP00000267082,9606.ENSP00000334008,9606.ENSP00000346839,9606.ENSP00000362680,9606.ENSP00000367316,9606.ENSP00000379975,9606.ENSP00000380227,9606.ENSP00000384515,9606.ENSP00000391583,9606.ENSP00000400175,9606.ENSP00000419060,9606.ENSP00000428056,9606.ENSP00000452786	LAMC1,ITGAV,ITGB7,PARVA,FN1,SRC,ITGA8,ILK,ITGA4,PARVB,PARVG,RHOA,BRAF,PIK3R1,ITGB3
GO:0034614	Cellular response to reactive oxygen species	25	118	0.79	1.59	2.97e-10	MAPK13,MAPK1,PDGFRA,RIPK1,MAPK3,PXN,EGFR,NCF1,NOS3,FOS,PRKCD,MAPT,PRKAA1,FYN,MAP3K5,CHUK,JUN,SRC,CDK1,MAPK8,RELA,SLC8A1,MAPK9,AKT1,BTK
GO:0034638	Phosphatidylcholine catabolic process	4	12	0.91	0.43	0.0192	9606.ENSP00000219345,9606.ENSP00000274793,9606.ENSP00000330442,9606.ENSP00000384610	PLA2G15,PLA2G7,PLB1,PNPLA7
GO:0035020	Regulation of Rac protein signal transduction	6	24	0.86	0.57	0.0040	KRAS,CRK,OGT,RASGRF1,PIK3CG,PIK3CB
GO:0035020	Regulation of Rac protein signal transduction	6	24	0.78	0.51	0.0073	9606.ENSP00000256078,9606.ENSP00000300574,9606.ENSP00000362824,9606.ENSP00000405963,9606.ENSP00000419260,9606.ENSP00000501150	KRAS,CRK,OGT,RASGRF1,PIK3CG,PIK3CB
GO:0035022	Positive regulation of Rac protein signal transduction	3	6	1.16	0.44	0.0206	KRAS,PIK3CG,PIK3CB
GO:0035022	Positive regulation of Rac protein signal transduction	3	6	1.08	0.4	0.0263	9606.ENSP00000256078,9606.ENSP00000419260,9606.ENSP00000501150	KRAS,PIK3CG,PIK3CB
GO:0035066	Positive regulation of histone acetylation	10	41	0.77	0.77	0.00029	9606.ENSP00000221930,9606.ENSP00000263025,9606.ENSP00000264867,9606.ENSP00000284981,9606.ENSP00000333896,9606.ENSP00000348089,9606.ENSP00000418960,9606.ENSP00000477999,9606.ENSP00000479667,9606.ENSP00000496954	TGFB1,MAPK3,PPARGC1A,APP,RPS6KA4,ERCC6,BRCA1,NOS1,RPS6KA5,MYO1C
GO:0035094	Response to nicotine	14	48	0.85	1.18	1.72e-06	9606.ENSP00000155840,9606.ENSP00000215832,9606.ENSP00000226574,9606.ENSP00000294728,9606.ENSP00000369647,9606.ENSP00000370421,9606.ENSP00000370571,9606.ENSP00000378040,9606.ENSP00000381185,9606.ENSP00000384273,9606.ENSP00000385523,9606.ENSP00000398698,9606.ENSP00000431418,9606.ENSP00000497069	KCNQ1,MAPK1,NFKB1,VCAM1,AVP,PDX1,TH,BAD,BCL2,RELA,PPARA,TNF,NTRK1,IGF1R
GO:0035162	Embryonic hemopoiesis	6	22	0.82	0.54	0.0052	9606.ENSP00000263923,9606.ENSP00000288135,9606.ENSP00000300651,9606.ENSP00000336790,9606.ENSP00000361892,9606.ENSP00000437955	KDR,KIT,MED1,ATF4,STK4,HIF1A
GO:0035304	Regulation of protein dephosphorylation	23	93	0.78	1.47	3.58e-09	9606.ENSP00000221930,9606.ENSP00000254079,9606.ENSP00000261799,9606.ENSP00000275364,9606.ENSP00000282588,9606.ENSP00000291295,9606.ENSP00000298552,9606.ENSP00000299767,9606.ENSP00000312999,9606.ENSP00000317985,9606.ENSP00000324806,9606.ENSP00000331602,9606.ENSP00000354558,9606.ENSP00000360609,9606.ENSP00000360973,9606.ENSP00000361930,9606.ENSP00000371067,9606.ENSP00000382697,9606.ENSP00000398698,…	TGFB1,PPP1R1B,PDGFRB,GNA12,ITGA1,CALM3,TSC1,HSP90B1,GNAI2,ROCK2,GSK3B,PRKCD,MTOR,HSP90AB1,AGTR2,YWHAB,JAK2,ROCK1,TNF,IKBKB,AMBRA1,CALM1,CALM2
GO:0035306	Positive regulation of dephosphorylation	17	64	0.81	1.26	2.80e-07	9606.ENSP00000221930,9606.ENSP00000261799,9606.ENSP00000275364,9606.ENSP00000282588,9606.ENSP00000291295,9606.ENSP00000296585,9606.ENSP00000331602,9606.ENSP00000332973,9606.ENSP00000354558,9606.ENSP00000360609,9606.ENSP00000360973,9606.ENSP00000362680,9606.ENSP00000371067,9606.ENSP00000382697,9606.ENSP00000431926,9606.ENSP00000499717,9606.ENSP00000499797	TGFB1,PDGFRB,GNA12,ITGA1,CALM3,ITGA2,PRKCD,SMAD3,MTOR,HSP90AB1,AGTR2,SRC,JAK2,ROCK1,AMBRA1,CALM1,CALM2
GO:0035307	Positive regulation of protein dephosphorylation	13	49	0.81	1.03	1.07e-05	9606.ENSP00000221930,9606.ENSP00000261799,9606.ENSP00000275364,9606.ENSP00000282588,9606.ENSP00000291295,9606.ENSP00000331602,9606.ENSP00000354558,9606.ENSP00000360609,9606.ENSP00000360973,9606.ENSP00000371067,9606.ENSP00000431926,9606.ENSP00000499717,9606.ENSP00000499797	TGFB1,PDGFRB,GNA12,ITGA1,CALM3,PRKCD,MTOR,HSP90AB1,AGTR2,JAK2,AMBRA1,CALM1,CALM2
GO:0035308	Negative regulation of protein dephosphorylation	8	34	0.76	0.62	0.0019	9606.ENSP00000254079,9606.ENSP00000312999,9606.ENSP00000317985,9606.ENSP00000324806,9606.ENSP00000361930,9606.ENSP00000382697,9606.ENSP00000398698,9606.ENSP00000430684	PPP1R1B,GNAI2,ROCK2,GSK3B,YWHAB,ROCK1,TNF,IKBKB
GO:0035335	Peptidyl-tyrosine dephosphorylation	8	35	0.82	0.7	0.00090	DUSP3,DUSP1,PTPRR,PTPN5,DUSP10,PTPN6,DUSP7,PTPN11
GO:0035335	Peptidyl-tyrosine dephosphorylation	9	35	0.79	0.74	0.00048	9606.ENSP00000226004,9606.ENSP00000239223,9606.ENSP00000283228,9606.ENSP00000311857,9606.ENSP00000351342,9606.ENSP00000355866,9606.ENSP00000391592,9606.ENSP00000417183,9606.ENSP00000489597	DUSP3,DUSP1,PTPRR,PTPN2,PTPN5,DUSP10,PTPN6,DUSP7,PTPN11
GO:0035357	Peroxisome proliferator activated receptor signaling pathway	6	9	1.29	1.03	7.68e-05	ACTN4,PPARG,MED1,NCOA1,NCOA2,RXRA
GO:0035357	Peroxisome proliferator activated receptor signaling pathway	6	9	1.21	0.94	0.00016	9606.ENSP00000252699,9606.ENSP00000287820,9606.ENSP00000300651,9606.ENSP00000385216,9606.ENSP00000399968,9606.ENSP00000419692	ACTN4,PPARG,MED1,NCOA1,NCOA2,RXRA
GO:0035408	Histone H3-T6 phosphorylation	2	2	1.46	0.36	0.0445	PRKCA,PRKCB
GO:0035408	Histone H3-T6 phosphorylation	2	2	1.38	0.35	0.0489	9606.ENSP00000408695,9606.ENSP00000496129	PRKCA,PRKCB
GO:0035509	Negative regulation of myosin-light-chain-phosphatase activity	3	5	1.24	0.47	0.0148	ROCK2,ROCK1,IKBKB
GO:0035509	Negative regulation of myosin-light-chain-phosphatase activity	4	5	1.29	0.67	0.0023	9606.ENSP00000317985,9606.ENSP00000382697,9606.ENSP00000398698,9606.ENSP00000430684	ROCK2,ROCK1,TNF,IKBKB
GO:0035556	Intracellular signal transduction	295	1518	0.75	3.45	4.83e-130	NGFR,MAPK13,MAPK12,MAPK1,SOS2,NFKBIA,ARHGDIG,RIPK2,PIK3R2,BLNK,RPS6KB1,NFKB1,CCND1,CDKN1B,ARHGDIB,MAPK14,AHR,PLCG1,RRAS,TRAF2,TICAM1,RAC2,RAP1B,ARHGEF6,MKNK2,SESN2,PPP1R1B,PI4KA,KRAS,RRAS2,IRAK2,LAMTOR5,PDGFRA,PPP1R1A,MDM2,RIPK1,TLR2,ITGAV,NDC80,PDGFRB,RHEB,PIK3R3,RPS6KA6,MAP2K2,MAPK3,PRKCQ,EP300,PRKCG,KDR,PIK3CA,SLC9A1,FARP2,ATF2,PIKFYVE,RAPGEF2,FNIP2,SHC2,ZAP70,RASGRF2,PRKAR2A,PRKAR2B,MAPKAP1,P…
GO:0035624	Receptor transactivation	4	5	1.29	0.67	0.0023	9606.ENSP00000280155,9606.ENSP00000361066,9606.ENSP00000386069,9606.ENSP00000480573	ADRA2A,NCOA3,ADRA2C,ADRA2B
GO:0035633	Maintenance of blood-brain barrier	7	34	0.78	0.57	0.0037	VCL,SLC12A2,GJA1,TJP1,ITGB1,ACTG1,ACTB
GO:0035635	Entry of bacterium into host cell	2	2	1.46	0.36	0.0445	CBL,SRC
GO:0035635	Entry of bacterium into host cell	2	2	1.38	0.35	0.0489	9606.ENSP00000264033,9606.ENSP00000362680	CBL,SRC
GO:0035637	Multicellular organismal signaling	25	124	0.77	1.52	7.33e-10	KCNQ1,KCNMB4,SLC9A1,KCNN2,CACNA1C,GJA1,CACNA1D,GJD2,KCNJ3,PRKACA,KCNMB3,SCN4B,SCN5A,PLN,MTOR,RYR2,KCNE1,SLC8A1,CTNNA3,SCN1B,KCNMB2,CAMK2D,KCNJ5,KCNE1B,SCN7A
GO:0035640	Exploration behavior	7	29	0.77	0.56	0.0037	9606.ENSP00000231948,9606.ENSP00000252486,9606.ENSP00000306124,9606.ENSP00000315190,9606.ENSP00000353731,9606.ENSP00000356646,9606.ENSP00000360973	CRBN,APOE,PRKCE,ITGA3,DPP4,TNR,AGTR2
GO:0035641	Locomotory exploration behavior	5	16	0.88	0.51	0.0083	9606.ENSP00000231948,9606.ENSP00000252486,9606.ENSP00000306124,9606.ENSP00000353731,9606.ENSP00000356646	CRBN,APOE,PRKCE,DPP4,TNR
GO:0035666	TRIF-dependent toll-like receptor signaling pathway	5	7	1.32	0.88	0.00035	TICAM1,TLR4,TRAF3,TLR6,IRF3
GO:0035666	TRIF-dependent toll-like receptor signaling pathway	4	7	1.14	0.58	0.0050	9606.ENSP00000248244,9606.ENSP00000363089,9606.ENSP00000376500,9606.ENSP00000389600	TICAM1,TLR4,TRAF3,TLR6
GO:0035685	Helper T cell diapedesis	2	2	1.46	0.36	0.0445	CRK,CRKL
GO:0035685	Helper T cell diapedesis	2	2	1.38	0.35	0.0489	9606.ENSP00000300574,9606.ENSP00000346300	CRK,CRKL
GO:0035728	Response to hepatocyte growth factor	5	18	0.91	0.52	0.0075	GAB1,CRK,MED1,RELA,CREB1
GO:0035728	Response to hepatocyte growth factor	5	18	0.83	0.46	0.0122	9606.ENSP00000262995,9606.ENSP00000300574,9606.ENSP00000300651,9606.ENSP00000384273,9606.ENSP00000387699	GAB1,CRK,MED1,RELA,CREB1
GO:0035739	CD4-positive, alpha-beta T cell proliferation	4	9	1.11	0.56	0.0064	RIPK2,PRKCQ,CD28,CBLB
GO:0035739	CD4-positive, alpha-beta T cell proliferation	4	9	1.03	0.51	0.0093	9606.ENSP00000220751,9606.ENSP00000263125,9606.ENSP00000324890,9606.ENSP00000499037	RIPK2,PRKCQ,CD28,CBLB
GO:0035771	interleukin-4-mediated signaling pathway	3	4	1.26	0.49	0.0129	9606.ENSP00000300134,9606.ENSP00000363318,9606.ENSP00000432511	STAT6,IL2RG,JAK3
GO:0035794	Positive regulation of mitochondrial membrane permeability	11	32	0.92	1.1	9.23e-06	9606.ENSP00000222330,9606.ENSP00000263980,9606.ENSP00000264110,9606.ENSP00000269305,9606.ENSP00000293288,9606.ENSP00000318822,9606.ENSP00000324806,9606.ENSP00000329213,9606.ENSP00000363591,9606.ENSP00000376943,9606.ENSP00000378974	GSK3A,SLC9A1,ATF2,TP53,BAX,BID,GSK3B,SIVA1,BAK1,BCL2L11,MAPK8
GO:0035813	Regulation of renal sodium excretion	7	19	0.95	0.77	0.00052	9606.ENSP00000299178,9606.ENSP00000312999,9606.ENSP00000355627,9606.ENSP00000366416,9606.ENSP00000369647,9606.ENSP00000398832,9606.ENSP00000496396	AVPR1A,GNAI2,AGT,EDNRB,AVP,AGTR1,AVPR2
GO:0035815	Positive regulation of renal sodium excretion	4	12	0.91	0.43	0.0192	9606.ENSP00000299178,9606.ENSP00000312999,9606.ENSP00000355627,9606.ENSP00000366416	AVPR1A,GNAI2,AGT,EDNRB
GO:0035855	Megakaryocyte development	6	22	0.9	0.61	0.0028	EP300,KIT,MED1,PIP4K2A,PTPN6,PTPN11
GO:0035855	Megakaryocyte development	6	22	0.82	0.54	0.0052	9606.ENSP00000263253,9606.ENSP00000288135,9606.ENSP00000300651,9606.ENSP00000365757,9606.ENSP00000391592,9606.ENSP00000489597	EP300,KIT,MED1,PIP4K2A,PTPN6,PTPN11
GO:0035902	Response to immobilization stress	7	23	0.95	0.76	0.00057	PPARG,TFF1,FOS,FOXO3,FOXO4,PTK2B,SLC8A1
GO:0035902	Response to immobilization stress	9	23	0.98	1.01	3.62e-05	9606.ENSP00000221930,9606.ENSP00000287820,9606.ENSP00000291527,9606.ENSP00000306245,9606.ENSP00000339527,9606.ENSP00000363377,9606.ENSP00000370571,9606.ENSP00000380638,9606.ENSP00000384763	TGFB1,PPARG,TFF1,FOS,FOXO3,FOXO4,TH,PTK2B,SLC8A1
GO:0035924	Cellular response to vascular endothelial growth factor stimulus	14	42	0.99	1.5	6.86e-08	MAPK14,FLT3,PDGFRA,PDGFRB,GAB1,KDR,PIK3CA,MAP2K3,MAPKAPK2,PIK3CD,RELA,NR4A1,AKT1,MYO1C
GO:0035924	Cellular response to vascular endothelial growth factor stimulus	20	42	1.06	2.21	4.50e-12	9606.ENSP00000229795,9606.ENSP00000241453,9606.ENSP00000257290,9606.ENSP00000261799,9606.ENSP00000262995,9606.ENSP00000263923,9606.ENSP00000263967,9606.ENSP00000282397,9606.ENSP00000294728,9606.ENSP00000311127,9606.ENSP00000345083,9606.ENSP00000356070,9606.ENSP00000366563,9606.ENSP00000384273,9606.ENSP00000390535,9606.ENSP00000393978,9606.ENSP00000440864,9606.ENSP00000451040,9606.ENSP00000451828,…	MAPK14,FLT3,PDGFRA,PDGFRB,GAB1,KDR,PIK3CA,FLT1,VCAM1,VEGFB,MAP2K3,MAPKAPK2,PIK3CD,RELA,PRKD1,PRKD2,NR4A1,PGF,AKT1,MYO1C
GO:0035970	Peptidyl-threonine dephosphorylation	4	18	0.81	0.35	0.0390	PPP2CB,DUSP1,DUSP10,PPP2CA
GO:0035970	Peptidyl-threonine dephosphorylation	5	18	0.83	0.46	0.0122	9606.ENSP00000012443,9606.ENSP00000221138,9606.ENSP00000239223,9606.ENSP00000355866,9606.ENSP00000418447	PPP5C,PPP2CB,DUSP1,DUSP10,PPP2CA
GO:0035994	Response to muscle stretch	12	26	1.13	1.62	5.05e-08	NFKBIA,NFKB1,MAPK14,PIK3CA,SLC9A1,FOS,PTK2,RYR2,JUN,RELA,SLC8A1,RAF1
GO:0035994	Response to muscle stretch	13	26	1.08	1.62	3.62e-08	9606.ENSP00000216797,9606.ENSP00000226574,9606.ENSP00000229795,9606.ENSP00000263967,9606.ENSP00000263980,9606.ENSP00000306245,9606.ENSP00000341189,9606.ENSP00000355533,9606.ENSP00000360266,9606.ENSP00000384273,9606.ENSP00000384763,9606.ENSP00000401888,9606.ENSP00000495360	NFKBIA,NFKB1,MAPK14,PIK3CA,SLC9A1,FOS,PTK2,RYR2,JUN,RELA,SLC8A1,RAF1,CTNNB1
GO:0036003	Positive regulation of transcription from RNA polymerase II promoter in response to stress	6	25	0.84	0.56	0.0047	CREB3L3,SESN2,TP53,ATF4,DDIT3,CREB3L1
GO:0036003	Positive regulation of transcription from RNA polymerase II promoter in response to stress	7	25	0.83	0.63	0.0019	9606.ENSP00000078445,9606.ENSP00000269305,9606.ENSP00000324173,9606.ENSP00000336790,9606.ENSP00000437955,9606.ENSP00000448665,9606.ENSP00000481956	CREB3L3,TP53,HSPA5,ATF4,HIF1A,DDIT3,CREB3L1
GO:0036016	Cellular response to interleukin-3	3	7	1.02	0.37	0.0352	9606.ENSP00000222330,9606.ENSP00000324806,9606.ENSP00000371067	GSK3A,GSK3B,JAK2
GO:0036092	phosphatidylinositol-3-phosphate biosynthetic process	11	21	1.18	1.61	8.40e-08	INPP4A,PIK3R3,PIK3CA,PIKFYVE,PIK3C2A,PIK3C2B,PIK3CD,PIK3CG,INPP4B,PIK3C2G,PIK3CB
GO:0036092	phosphatidylinositol-3-phosphate biosynthetic process	9	21	1.02	1.07	2.10e-05	9606.ENSP00000074304,9606.ENSP00000262741,9606.ENSP00000263967,9606.ENSP00000356155,9606.ENSP00000366563,9606.ENSP00000419260,9606.ENSP00000422793,9606.ENSP00000445381,9606.ENSP00000501150	INPP4A,PIK3R3,PIK3CA,PIK3C2B,PIK3CD,PIK3CG,INPP4B,PIK3C2G,PIK3CB
GO:0036119	Response to platelet-derived growth factor	11	26	1.09	1.43	4.23e-07	PDGFRA,PDGFRB,CBL,IQGAP1,FYN,HDAC1,SRC,TLR4,DDIT3,ITGB3,CCNA2
GO:0036119	Response to platelet-derived growth factor	11	26	1.01	1.26	1.91e-06	9606.ENSP00000257290,9606.ENSP00000261799,9606.ENSP00000264033,9606.ENSP00000268182,9606.ENSP00000346671,9606.ENSP00000362649,9606.ENSP00000362680,9606.ENSP00000363089,9606.ENSP00000448665,9606.ENSP00000452786,9606.ENSP00000496414	PDGFRA,PDGFRB,CBL,IQGAP1,FYN,HDAC1,SRC,TLR4,DDIT3,ITGB3,RDX
GO:0036120	Cellular response to platelet-derived growth factor stimulus	10	24	1.08	1.3	1.91e-06	PDGFRA,PDGFRB,CBL,IQGAP1,FYN,HDAC1,SRC,TLR4,ITGB3,CCNA2
GO:0036120	Cellular response to platelet-derived growth factor stimulus	10	24	1.0	1.15	7.35e-06	9606.ENSP00000257290,9606.ENSP00000261799,9606.ENSP00000264033,9606.ENSP00000268182,9606.ENSP00000346671,9606.ENSP00000362649,9606.ENSP00000362680,9606.ENSP00000363089,9606.ENSP00000452786,9606.ENSP00000496414	PDGFRA,PDGFRB,CBL,IQGAP1,FYN,HDAC1,SRC,TLR4,ITGB3,RDX
GO:0036148	Phosphatidylglycerol acyl-chain remodeling	3	9	0.99	0.35	0.0445	PLA2G4D,PLA2G4F,PLA2G4B
GO:0036148	Phosphatidylglycerol acyl-chain remodeling	4	9	1.03	0.51	0.0093	9606.ENSP00000290472,9606.ENSP00000317300,9606.ENSP00000380442,9606.ENSP00000396045	PLA2G4D,LPCAT4,PLA2G4F,PLA2G4B
GO:0036150	Phosphatidylserine acyl-chain remodeling	4	9	1.03	0.51	0.0093	9606.ENSP00000261407,9606.ENSP00000302177,9606.ENSP00000317300,9606.ENSP00000324944	LPCAT3,MBOAT2,LPCAT4,MBOAT1
GO:0036151	Phosphatidylcholine acyl-chain remodeling	7	15	1.05	0.9	0.00017	9606.ENSP00000261407,9606.ENSP00000302177,9606.ENSP00000317300,9606.ENSP00000330442,9606.ENSP00000396045,9606.ENSP00000472546,9606.ENSP00000486361	LPCAT3,MBOAT2,LPCAT4,PLB1,PLA2G4B,PLA2G4C,DBI
GO:0036152	Phosphatidylethanolamine acyl-chain remodeling	7	12	1.15	1.02	6.08e-05	9606.ENSP00000261407,9606.ENSP00000302177,9606.ENSP00000317300,9606.ENSP00000320337,9606.ENSP00000324944,9606.ENSP00000396045,9606.ENSP00000472546	LPCAT3,MBOAT2,LPCAT4,PLAAT3,MBOAT1,PLA2G4B,PLA2G4C
GO:0036289	Peptidyl-serine autophosphorylation	4	9	1.11	0.56	0.0064	RIPK1,MAP2K2,PIKFYVE,PRKG2
GO:0036294	Cellular response to decreased oxygen levels	29	136	0.79	1.76	6.51e-12	JUND,MDM2,EEF2K,SLC9A1,CBL,ATF2,TP53,KCNMB1,PPARG,PRKCE,FOS,RPTOR,ATF4,FOXO3,PRKAA1,MTOR,MDM4,IRAK1,PTEN,SRC,CYBB,SLC8A3,BAD,SLC8A1,KCNK2,CPEB2,AKT1,MLST8,CCNA2
GO:0036294	Cellular response to decreased oxygen levels	32	136	0.76	1.73	3.90e-12	9606.ENSP00000252818,9606.ENSP00000258149,9606.ENSP00000263026,9606.ENSP00000263980,9606.ENSP00000264033,9606.ENSP00000264110,9606.ENSP00000269305,9606.ENSP00000274629,9606.ENSP00000287820,9606.ENSP00000298552,9606.ENSP00000306124,9606.ENSP00000306245,9606.ENSP00000307272,9606.ENSP00000336790,9606.ENSP00000339527,9606.ENSP00000346148,9606.ENSP00000354558,9606.ENSP00000356150,9606.ENSP00000358997,…	JUND,MDM2,EEF2K,SLC9A1,CBL,ATF2,TP53,KCNMB1,PPARG,TSC1,PRKCE,FOS,RPTOR,ATF4,FOXO3,PRKAA1,MTOR,MDM4,IRAK1,PTEN,PLK3,SRC,NKX3-1,SLC8A3,BAD,BCL2,SLC8A1,KCNK2,HIF1A,CITED2,AKT1,MLST8
GO:0038027	Apolipoprotein A-I-mediated signaling pathway	3	5	1.24	0.47	0.0148	ITGAV,RHOA,ITGB3
GO:0038027	Apolipoprotein A-I-mediated signaling pathway	3	5	1.16	0.44	0.0192	9606.ENSP00000261023,9606.ENSP00000400175,9606.ENSP00000452786	ITGAV,RHOA,ITGB3
GO:0038033	Positive regulation of endothelial cell chemotaxis by VEGF-activated vascular endothelial growth factor receptor signaling pathway	3	4	1.26	0.49	0.0129	9606.ENSP00000263923,9606.ENSP00000390535,9606.ENSP00000393978	KDR,PRKD1,PRKD2
GO:0038061	NIK/NF-kappaB signaling	12	36	0.99	1.32	7.94e-07	TRAF2,MAP3K7,IRAK1,CHUK,ALK,TIRAP,RELA,TLR6,TRAF6,AKT1,MAP3K14,MALT1
GO:0038061	NIK/NF-kappaB signaling	14	36	0.97	1.46	1.05e-07	9606.ENSP00000247668,9606.ENSP00000346340,9606.ENSP00000358335,9606.ENSP00000358997,9606.ENSP00000359424,9606.ENSP00000373700,9606.ENSP00000376445,9606.ENSP00000384273,9606.ENSP00000389600,9606.ENSP00000433623,9606.ENSP00000451828,9606.ENSP00000464030,9606.ENSP00000482657,9606.ENSP00000497997	TRAF2,COPS8,MAP3K7,IRAK1,CHUK,ALK,TIRAP,RELA,TLR6,TRAF6,AKT1,IKBKE,MAP3K14,MALT1
GO:0038065	Collagen-activated signaling pathway	4	17	0.84	0.37	0.0336	ITGA2,ITGA11,SYK,JAK2
GO:0038065	Collagen-activated signaling pathway	4	17	0.76	0.33	0.0473	9606.ENSP00000296585,9606.ENSP00000327290,9606.ENSP00000364898,9606.ENSP00000371067	ITGA2,ITGA11,SYK,JAK2
GO:0038066	p38MAPK cascade	8	13	1.25	1.31	3.75e-06	MAPK14,ATF2,MAPK11,MAP2K3,MAP3K5,MAPKAPK2,MAP3K7,MAP2K6
GO:0038066	p38MAPK cascade	8	13	1.17	1.18	1.08e-05	9606.ENSP00000229795,9606.ENSP00000264110,9606.ENSP00000333685,9606.ENSP00000345083,9606.ENSP00000351908,9606.ENSP00000356070,9606.ENSP00000358335,9606.ENSP00000468348	MAPK14,ATF2,MAPK11,MAP2K3,MAP3K5,MAPKAPK2,MAP3K7,MAP2K6
GO:0038083	Peptidyl-tyrosine autophosphorylation	10	18	1.21	1.53	2.65e-07	MAPK3,KDR,EGFR,INSR,SRC,ALK,PTK2B,NTRK1,BTK,IGF1R
GO:0038083	Peptidyl-tyrosine autophosphorylation	10	18	1.13	1.37	1.04e-06	9606.ENSP00000263025,9606.ENSP00000263923,9606.ENSP00000275493,9606.ENSP00000303830,9606.ENSP00000362680,9606.ENSP00000373700,9606.ENSP00000380638,9606.ENSP00000431418,9606.ENSP00000483570,9606.ENSP00000497069	MAPK3,KDR,EGFR,INSR,SRC,ALK,PTK2B,NTRK1,BTK,IGF1R
GO:0038084	Vascular endothelial growth factor signaling pathway	8	21	1.05	1.0	5.14e-05	FLT3,PDGFRA,PDGFRB,GAB1,KDR,PIK3CA,PIK3CD,MYO1C
GO:0038084	Vascular endothelial growth factor signaling pathway	13	21	1.18	1.83	5.58e-09	9606.ENSP00000241453,9606.ENSP00000257290,9606.ENSP00000261799,9606.ENSP00000262995,9606.ENSP00000263923,9606.ENSP00000263967,9606.ENSP00000282397,9606.ENSP00000311127,9606.ENSP00000366563,9606.ENSP00000390535,9606.ENSP00000393978,9606.ENSP00000451040,9606.ENSP00000496954	FLT3,PDGFRA,PDGFRB,GAB1,KDR,PIK3CA,FLT1,VEGFB,PIK3CD,PRKD1,PRKD2,PGF,MYO1C
GO:0038089	Positive regulation of cell migration by vascular endothelial growth factor signaling pathway	4	7	1.22	0.63	0.0034	GAB1,KDR,PIK3CD,MYO1C
GO:0038089	Positive regulation of cell migration by vascular endothelial growth factor signaling pathway	6	7	1.32	1.05	6.24e-05	9606.ENSP00000262995,9606.ENSP00000263923,9606.ENSP00000366563,9606.ENSP00000390535,9606.ENSP00000393978,9606.ENSP00000496954	GAB1,KDR,PIK3CD,PRKD1,PRKD2,MYO1C
GO:0038091	Positive regulation of cell proliferation by VEGF-activated platelet derived growth factor receptor signaling pathway	2	2	1.46	0.36	0.0445	PDGFRA,PDGFRB
GO:0038091	Positive regulation of cell proliferation by VEGF-activated platelet derived growth factor receptor signaling pathway	2	2	1.38	0.35	0.0489	9606.ENSP00000257290,9606.ENSP00000261799	PDGFRA,PDGFRB
GO:0038093	Fc receptor signaling pathway	25	51	1.15	3.01	6.71e-17	PLCG1,PRKCQ,KIT,FCER1G,PRKCE,PRKCD,PTK2,FYN,MAP3K7,VAV3,VAV2,SRC,SYK,MAPK8,MAP2K7,MAP3K1,SOS1,MAPK9,MAP2K4,LYN,IKBKB,TRAF6,VAV1,PLCG2,BTK
GO:0038093	Fc receptor signaling pathway	26	51	1.09	2.8	3.77e-16	9606.ENSP00000244007,9606.ENSP00000263125,9606.ENSP00000288135,9606.ENSP00000289902,9606.ENSP00000306124,9606.ENSP00000331602,9606.ENSP00000341189,9606.ENSP00000346671,9606.ENSP00000358335,9606.ENSP00000359073,9606.ENSP00000360916,9606.ENSP00000362680,9606.ENSP00000363117,9606.ENSP00000364898,9606.ENSP00000365012,9606.ENSP00000378974,9606.ENSP00000381070,9606.ENSP00000382423,9606.ENSP00000394560,…	PLCG1,PRKCQ,KIT,FCER1G,PRKCE,PRKCD,PTK2,FYN,MAP3K7,VAV3,VAV2,SRC,FGR,SYK,HCK,MAPK8,MAP2K7,MAP3K1,MAPK9,MAP2K4,LYN,IKBKB,TRAF6,VAV1,PLCG2,BTK
GO:0038094	Fc-gamma receptor signaling pathway	11	29	1.04	1.33	9.84e-07	FCER1G,PRKCE,PRKCD,PTK2,FYN,VAV3,VAV2,SRC,SYK,LYN,VAV1
GO:0038094	Fc-gamma receptor signaling pathway	13	29	1.04	1.51	9.68e-08	9606.ENSP00000289902,9606.ENSP00000306124,9606.ENSP00000331602,9606.ENSP00000341189,9606.ENSP00000346671,9606.ENSP00000359073,9606.ENSP00000360916,9606.ENSP00000362680,9606.ENSP00000363117,9606.ENSP00000364898,9606.ENSP00000365012,9606.ENSP00000428924,9606.ENSP00000472929	FCER1G,PRKCE,PRKCD,PTK2,FYN,VAV3,VAV2,SRC,FGR,SYK,HCK,LYN,VAV1
GO:0038095	Fc-epsilon receptor signaling pathway	19	23	1.38	3.27	7.52e-16	PLCG1,PRKCQ,FCER1G,MAP3K7,VAV3,VAV2,SYK,MAPK8,MAP2K7,MAP3K1,SOS1,MAPK9,MAP2K4,LYN,IKBKB,TRAF6,VAV1,PLCG2,BTK
GO:0038095	Fc-epsilon receptor signaling pathway	18	23	1.28	2.73	1.56e-13	9606.ENSP00000244007,9606.ENSP00000263125,9606.ENSP00000289902,9606.ENSP00000358335,9606.ENSP00000359073,9606.ENSP00000360916,9606.ENSP00000364898,9606.ENSP00000378974,9606.ENSP00000381070,9606.ENSP00000382423,9606.ENSP00000394560,9606.ENSP00000410402,9606.ENSP00000428924,9606.ENSP00000430684,9606.ENSP00000433623,9606.ENSP00000472929,9606.ENSP00000482457,9606.ENSP00000483570	PLCG1,PRKCQ,FCER1G,MAP3K7,VAV3,VAV2,SYK,MAPK8,MAP2K7,MAP3K1,MAPK9,MAP2K4,LYN,IKBKB,TRAF6,VAV1,PLCG2,BTK
GO:0038096	Fc-gamma receptor signaling pathway involved in phagocytosis	10	21	1.14	1.41	7.58e-07	PRKCE,PRKCD,PTK2,FYN,VAV3,VAV2,SRC,SYK,LYN,VAV1
GO:0038096	Fc-gamma receptor signaling pathway involved in phagocytosis	12	21	1.14	1.63	4.80e-08	9606.ENSP00000306124,9606.ENSP00000331602,9606.ENSP00000341189,9606.ENSP00000346671,9606.ENSP00000359073,9606.ENSP00000360916,9606.ENSP00000362680,9606.ENSP00000363117,9606.ENSP00000364898,9606.ENSP00000365012,9606.ENSP00000428924,9606.ENSP00000472929	PRKCE,PRKCD,PTK2,FYN,VAV3,VAV2,SRC,FGR,SYK,HCK,LYN,VAV1
GO:0038110	interleukin-2-mediated signaling pathway	3	5	1.16	0.44	0.0192	9606.ENSP00000363318,9606.ENSP00000432511,9606.ENSP00000499900	IL2RG,JAK3,JAK1
GO:0038124	Toll-like receptor TLR6:TLR2 signaling pathway	2	2	1.46	0.36	0.0445	TLR2,TLR6
GO:0038124	Toll-like receptor TLR6:TLR2 signaling pathway	2	2	1.38	0.35	0.0489	9606.ENSP00000260010,9606.ENSP00000389600	TLR2,TLR6
GO:0038127	ERBB signaling pathway	24	62	1.05	2.5	1.88e-14	MAPK1,PLCG1,GAB1,PIK3CA,CBL,PIK3C2A,ERBB3,IQGAP1,ERBB2,EGFR,PTPRR,PTK2,ERBB4,PDPK1,PLCE1,SRC,SHC3,GRB2,PTK2B,SOS1,SHC1,BRAF,AKT1,PTPN11
GO:0038127	ERBB signaling pathway	21	62	0.91	1.79	1.87e-10	9606.ENSP00000215832,9606.ENSP00000221930,9606.ENSP00000244007,9606.ENSP00000262995,9606.ENSP00000263967,9606.ENSP00000264033,9606.ENSP00000267101,9606.ENSP00000268182,9606.ENSP00000269571,9606.ENSP00000275493,9606.ENSP00000283228,9606.ENSP00000341189,9606.ENSP00000342235,9606.ENSP00000344220,9606.ENSP00000362680,9606.ENSP00000364995,9606.ENSP00000380638,9606.ENSP00000401303,9606.ENSP00000419060,…	MAPK1,TGFB1,PLCG1,GAB1,PIK3CA,CBL,ERBB3,IQGAP1,ERBB2,EGFR,PTPRR,PTK2,ERBB4,PDPK1,SRC,SHC3,PTK2B,SHC1,BRAF,AKT1,PTPN11
GO:0038128	ERBB2 signaling pathway	6	18	0.99	0.7	0.0012	ERBB3,ERBB2,EGFR,PTPRR,ERBB4,SRC
GO:0038128	ERBB2 signaling pathway	6	18	0.91	0.63	0.0024	9606.ENSP00000267101,9606.ENSP00000269571,9606.ENSP00000275493,9606.ENSP00000283228,9606.ENSP00000342235,9606.ENSP00000362680	ERBB3,ERBB2,EGFR,PTPRR,ERBB4,SRC
GO:0038156	interleukin-3-mediated signaling pathway	3	4	1.34	0.52	0.0102	FCER1G,SYK,CSF2RB
GO:0038166	Angiotensin-activated signaling pathway	5	13	0.97	0.58	0.0043	9606.ENSP00000355627,9606.ENSP00000360973,9606.ENSP00000362680,9606.ENSP00000398832,9606.ENSP00000500386	AGT,AGTR2,SRC,AGTR1,CAMK2A
GO:0038179	Neurotrophin signaling pathway	8	26	0.95	0.87	0.00017	RAPGEF2,RAP1A,SRC,AKT1S1,SOS1,RAF1,NTRK1,PTPN11
GO:0038179	Neurotrophin signaling pathway	6	26	0.75	0.47	0.0100	9606.ENSP00000358723,9606.ENSP00000362680,9606.ENSP00000375711,9606.ENSP00000401888,9606.ENSP00000431418,9606.ENSP00000489597	RAP1A,SRC,AKT1S1,RAF1,NTRK1,PTPN11
GO:0038202	TORC1 signaling	9	13	1.3	1.55	3.48e-07	LAMTOR5,LAMTOR1,RPTOR,LAMTOR4,MTOR,LAMTOR2,LAMTOR3,MLST8,NPRL3
GO:0038202	TORC1 signaling	5	13	0.97	0.58	0.0043	9606.ENSP00000307272,9606.ENSP00000343118,9606.ENSP00000354558,9606.ENSP00000424183,9606.ENSP00000457870	RPTOR,LAMTOR4,MTOR,LAMTOR3,MLST8
GO:0038203	TORC2 signaling	3	7	1.1	0.4	0.0276	MAPKAP1,PRR5L,PRR5
GO:0042026	Protein refolding	6	25	0.84	0.56	0.0047	HSPB6,HSPA9,HSPB2,HSP90AA1,HSPD1,HSPA1L
GO:0042059	Negative regulation of epidermal growth factor receptor signaling pathway	7	27	0.8	0.6	0.0027	9606.ENSP00000226004,9606.ENSP00000264033,9606.ENSP00000275493,9606.ENSP00000282588,9606.ENSP00000311857,9606.ENSP00000326366,9606.ENSP00000499037	DUSP3,CBL,EGFR,ITGA1,PTPN2,PSEN1,CBLB
GO:0042088	T-helper 1 type immune response	6	22	0.82	0.54	0.0052	9606.ENSP00000231228,9606.ENSP00000300134,9606.ENSP00000354558,9606.ENSP00000363089,9606.ENSP00000407586,9606.ENSP00000433623	IL12B,STAT6,MTOR,TLR4,HRAS,TRAF6
GO:0042098	T cell proliferation	15	72	0.78	1.09	3.10e-06	RIPK2,IL2,PRKCQ,TP53,ERBB2,BAX,RASGRP1,CD28,DLG1,FYN,PTEN,PTPN6,PIK3CG,MALT1,CBLB
GO:0042098	T cell proliferation	20	72	0.83	1.48	9.63e-09	9606.ENSP00000220751,9606.ENSP00000221930,9606.ENSP00000226730,9606.ENSP00000228534,9606.ENSP00000231228,9606.ENSP00000263125,9606.ENSP00000269305,9606.ENSP00000269571,9606.ENSP00000293288,9606.ENSP00000324890,9606.ENSP00000345731,9606.ENSP00000346671,9606.ENSP00000353408,9606.ENSP00000361021,9606.ENSP00000362082,9606.ENSP00000378306,9606.ENSP00000391592,9606.ENSP00000419260,9606.ENSP00000497997,…	RIPK2,TGFB1,IL2,IL23A,IL12B,PRKCQ,TP53,ERBB2,BAX,CD28,DLG1,FYN,MSN,PTEN,CCND3,PPP3CB,PTPN6,PIK3CG,MALT1,CBLB
GO:0042104	Positive regulation of activated T cell proliferation	7	28	0.78	0.58	0.0032	9606.ENSP00000226730,9606.ENSP00000228534,9606.ENSP00000231228,9606.ENSP00000321345,9606.ENSP00000378323,9606.ENSP00000432511,9606.ENSP00000470788	IL2,IL23A,IL12B,IL23R,PPP3CA,JAK3,IL12RB1
GO:0042116	Macrophage activation	17	62	0.9	1.51	1.85e-08	TICAM1,TLR2,PRKCE,MAPT,TLR9,TLR1,IFNGR1,JUN,TLR4,AGER,SYK,JAK2,ITGB2,TLR6,TRPV1,PLCG2,ITGAM
GO:0042116	Macrophage activation	19	62	0.87	1.54	6.68e-09	9606.ENSP00000248244,9606.ENSP00000260010,9606.ENSP00000284981,9606.ENSP00000306124,9606.ENSP00000353874,9606.ENSP00000354932,9606.ENSP00000356713,9606.ENSP00000360266,9606.ENSP00000363089,9606.ENSP00000363773,9606.ENSP00000364898,9606.ENSP00000371067,9606.ENSP00000380948,9606.ENSP00000389600,9606.ENSP00000398698,9606.ENSP00000459962,9606.ENSP00000482457,9606.ENSP00000496959,9606.ENSP00000500990	TICAM1,TLR2,APP,PRKCE,TLR9,TLR1,IFNGR1,JUN,TLR4,C1QA,SYK,JAK2,ITGB2,TLR6,TNF,TRPV1,PLCG2,ITGAM,SNCA
GO:0042149	Cellular response to glucose starvation	14	55	0.87	1.22	1.01e-06	ITFG2,SESN2,TP53,PRKAG2,SIK2,C12orf66,PRKAG1,ATF4,KPTN,FOXO3,PRKAA1,PRKAA2,PRKAG3,SZT2
GO:0042159	Lipoprotein catabolic process	4	16	0.78	0.34	0.0407	9606.ENSP00000233242,9606.ENSP00000252486,9606.ENSP00000320043,9606.ENSP00000363638	APOB,APOE,LYPLA1,LYPLA2
GO:0042307	Positive regulation of protein import into nucleus	9	42	0.8	0.73	0.00052	PIK3R2,MAPK14,PRKCD,SMAD3,HSP90AA1,JAK2,CDK1,MAVS,PIK3R1
GO:0042307	Positive regulation of protein import into nucleus	12	42	0.84	1.02	1.44e-05	9606.ENSP00000221930,9606.ENSP00000222254,9606.ENSP00000229795,9606.ENSP00000326366,9606.ENSP00000331602,9606.ENSP00000332973,9606.ENSP00000335153,9606.ENSP00000360609,9606.ENSP00000371067,9606.ENSP00000390535,9606.ENSP00000401980,9606.ENSP00000428056	TGFB1,PIK3R2,MAPK14,PSEN1,PRKCD,SMAD3,HSP90AA1,HSP90AB1,JAK2,PRKD1,MAVS,PIK3R1
GO:0042310	Vasoconstriction	9	34	0.81	0.76	0.00041	9606.ENSP00000222271,9606.ENSP00000315011,9606.ENSP00000355627,9606.ENSP00000366416,9606.ENSP00000369647,9606.ENSP00000369960,9606.ENSP00000384763,9606.ENSP00000400175,9606.ENSP00000450482	COMP,EDNRA,AGT,EDNRB,AVP,ADRA1A,SLC8A1,RHOA,BDKRB2
GO:0042311	Vasodilation	12	48	0.78	0.92	4.23e-05	9606.ENSP00000252486,9606.ENSP00000274629,9606.ENSP00000280155,9606.ENSP00000282588,9606.ENSP00000297494,9606.ENSP00000355627,9606.ENSP00000360973,9606.ENSP00000363092,9606.ENSP00000366416,9606.ENSP00000398698,9606.ENSP00000450482,9606.ENSP00000477999	APOE,KCNMB1,ADRA2A,ITGA1,NOS3,AGT,AGTR2,PRKG1,EDNRB,TNF,BDKRB2,NOS1
GO:0042495	Detection of triacyl bacterial lipopeptide	2	2	1.46	0.36	0.0445	TLR2,TLR1
GO:0042495	Detection of triacyl bacterial lipopeptide	2	2	1.38	0.35	0.0489	9606.ENSP00000260010,9606.ENSP00000354932	TLR2,TLR1
GO:0042496	Detection of diacyl bacterial lipopeptide	2	2	1.46	0.36	0.0445	TLR2,TLR6
GO:0042496	Detection of diacyl bacterial lipopeptide	2	2	1.38	0.35	0.0489	9606.ENSP00000260010,9606.ENSP00000389600	TLR2,TLR6
GO:0042509	Regulation of tyrosine phosphorylation of STAT protein	19	77	0.78	1.29	1.19e-07	9606.ENSP00000162749,9606.ENSP00000226730,9606.ENSP00000228534,9606.ENSP00000231228,9606.ENSP00000241453,9606.ENSP00000288135,9606.ENSP00000303231,9606.ENSP00000311857,9606.ENSP00000321345,9606.ENSP00000324804,9606.ENSP00000342235,9606.ENSP00000346671,9606.ENSP00000357470,9606.ENSP00000370698,9606.ENSP00000371067,9606.ENSP00000398698,9606.ENSP00000418447,9606.ENSP00000428924,9606.ENSP00000497527	TNFRSF1A,IL2,IL23A,IL12B,FLT3,KIT,IL12A,PTPN2,IL23R,PPP2R1A,ERBB4,FYN,IL6R,IL6ST,JAK2,TNF,PPP2CA,LYN,INPP5F
GO:0042531	Positive regulation of tyrosine phosphorylation of STAT protein	15	65	0.75	1.02	7.30e-06	9606.ENSP00000162749,9606.ENSP00000226730,9606.ENSP00000228534,9606.ENSP00000231228,9606.ENSP00000241453,9606.ENSP00000288135,9606.ENSP00000303231,9606.ENSP00000321345,9606.ENSP00000342235,9606.ENSP00000346671,9606.ENSP00000357470,9606.ENSP00000370698,9606.ENSP00000371067,9606.ENSP00000398698,9606.ENSP00000428924	TNFRSF1A,IL2,IL23A,IL12B,FLT3,KIT,IL12A,IL23R,ERBB4,FYN,IL6R,IL6ST,JAK2,TNF,LYN
GO:0042532	Negative regulation of tyrosine phosphorylation of STAT protein	4	12	0.91	0.43	0.0192	9606.ENSP00000311857,9606.ENSP00000324804,9606.ENSP00000418447,9606.ENSP00000497527	PTPN2,PPP2R1A,PPP2CA,INPP5F
GO:0042554	Superoxide anion generation	8	22	1.03	0.98	6.66e-05	CYBA,NOX4,NCF1,NCF2,NOX1,CYBB,NOX5,NCF4
GO:0042594	Response to starvation	47	206	0.82	2.43	3.13e-20	MAPK1,ITFG2,NPRL2,SESN2,WDR59,RRAGB,MAPK3,CBL,ATF2,TP53,FLCN,PPARG,PRKAG2,WDR24,LRRK2,SIK2,RPTOR,C12orf66,RNF152,PRKAG1,ULK1,ATF4,KPTN,FOXO3,MIOS,PRKAA1,MAX,TFEB,MAP3K5,MTOR,PIK3C2B,RRAGD,PRKAA2,RRAGC,PFKFB1,FOXO1,RRAGA,ULK2,MAPK8,SEH1L,PPARA,PRKAG3,FNIP1,DDIT3,SZT2,NPRL3,DEPDC5
GO:0042711	Maternal behavior	4	11	0.94	0.45	0.0154	9606.ENSP00000231509,9606.ENSP00000299178,9606.ENSP00000361021,9606.ENSP00000369647	NR3C1,AVPR1A,PTEN,AVP
GO:0042789	mRNA transcription by RNA polymerase II	11	44	0.86	0.99	2.58e-05	RARA,ATF2,THRA,PPARG,MED1,ATF4,THRB,NCOA1,CREB1,NCOA2,RXRA
GO:0042789	mRNA transcription by RNA polymerase II	12	44	0.82	0.99	2.10e-05	9606.ENSP00000254066,9606.ENSP00000264110,9606.ENSP00000264637,9606.ENSP00000264657,9606.ENSP00000287820,9606.ENSP00000300651,9606.ENSP00000336790,9606.ENSP00000379904,9606.ENSP00000385216,9606.ENSP00000387699,9606.ENSP00000399968,9606.ENSP00000419692	RARA,ATF2,THRA,STAT3,PPARG,MED1,ATF4,THRB,NCOA1,CREB1,NCOA2,RXRA
GO:0042921	Glucocorticoid receptor signaling pathway	3	6	1.16	0.44	0.0206	NR3C1,YWHAH,PTGES3
GO:0042921	Glucocorticoid receptor signaling pathway	3	6	1.08	0.4	0.0263	9606.ENSP00000231509,9606.ENSP00000320866,9606.ENSP00000482075	NR3C1,CALR,PTGES3
GO:0042953	Lipoprotein transport	4	17	0.76	0.33	0.0473	9606.ENSP00000233242,9606.ENSP00000243077,9606.ENSP00000287820,9606.ENSP00000496129	APOB,LRP1,PPARG,PRKCB
GO:0042994	Cytoplasmic sequestering of transcription factor	4	16	0.86	0.39	0.0284	NFKBIA,NFKBIE,NFKBIB,CREB3
GO:0042994	Cytoplasmic sequestering of transcription factor	4	16	0.78	0.34	0.0407	9606.ENSP00000216797,9606.ENSP00000275015,9606.ENSP00000312988,9606.ENSP00000342136	NFKBIA,NFKBIE,NFKBIB,CREB3
GO:0043011	Myeloid dendritic cell differentiation	6	21	0.84	0.56	0.0044	9606.ENSP00000221930,9606.ENSP00000222573,9606.ENSP00000282356,9606.ENSP00000283249,9606.ENSP00000326366,9606.ENSP00000433623	TGFB1,ITGB8,CAMK4,ITGB6,PSEN1,TRAF6
GO:0043084	Penile erection	3	5	1.16	0.44	0.0192	9606.ENSP00000299178,9606.ENSP00000361965,9606.ENSP00000369647	AVPR1A,ADA,AVP
GO:0043123	Positive regulation of I-kappaB kinase/NF-kappaB signaling	37	191	0.75	1.85	5.13e-14	RIPK2,TRAF2,TICAM1,LAMTOR5,RIPK1,TRAF5,GJA1,S100B,PRKCE,TBK1,TRADD,FYN,TLR9,TAB2,MAP3K7,IRAK1,CHUK,CARD9,TLR4,TAB3,TIRAP,RELA,TLR6,S100A13,RHOA,MAVS,TICAM2,IKBKB,TRAF6,IRF3,IRAK4,MAP3K14,IKBKG,PRKCB,MALT1,BCL10,MYD88
GO:0043149	Stress fiber assembly	5	18	0.91	0.52	0.0075	ITGB5,SRC,PTK2B,RHOA,BRAF
GO:0043149	Stress fiber assembly	5	18	0.83	0.46	0.0122	9606.ENSP00000296181,9606.ENSP00000362680,9606.ENSP00000380638,9606.ENSP00000400175,9606.ENSP00000419060	ITGB5,SRC,PTK2B,RHOA,BRAF
GO:0043200	Response to amino acid	30	117	0.87	2.1	4.58e-14	RPS6KB1,CDKN1B,SESN2,LAMTOR5,PDGFRA,CYBA,RRAGB,PIK3CA,EGFR,LAMTOR1,CAPN2,RPTOR,LAMTOR4,FYN,MTOR,LAMTOR2,RRAGD,RRAGC,BCL2L1,CYBB,RRAGA,PDX1,BAD,SLC38A9,CASTOR1,RHOA,LAMTOR3,LYN,IGF1R,MYD88
GO:0043201	Response to leucine	7	15	1.13	1.0	7.25e-05	RPS6KB1,SESN2,PIK3CA,RPTOR,MTOR,RRAGD,PDX1
GO:0043201	Response to leucine	6	15	0.99	0.7	0.0012	9606.ENSP00000225577,9606.ENSP00000263967,9606.ENSP00000307272,9606.ENSP00000354558,9606.ENSP00000358423,9606.ENSP00000370421	RPS6KB1,PIK3CA,RPTOR,MTOR,RRAGD,PDX1
GO:0043217	Myelin maintenance	4	17	0.76	0.33	0.0473	9606.ENSP00000361021,9606.ENSP00000375892,9606.ENSP00000386884,9606.ENSP00000451828	PTEN,AKT2,CXCR4,AKT1
GO:0043267	Negative regulation of potassium ion transport	8	33	0.85	0.73	0.00065	KCNQ1,NOS3,ATF4,PTK2B,KCNE1,NEDD4L,KCNE1B,NOS1
GO:0043267	Negative regulation of potassium ion transport	8	33	0.77	0.63	0.0016	9606.ENSP00000155840,9606.ENSP00000231948,9606.ENSP00000297494,9606.ENSP00000336790,9606.ENSP00000380638,9606.ENSP00000382226,9606.ENSP00000477875,9606.ENSP00000477999	KCNQ1,CRBN,NOS3,ATF4,PTK2B,KCNE1,KCNE1B,NOS1
GO:0043276	Anoikis	6	12	1.16	0.89	0.00024	PIK3CA,MTOR,MAP3K7,AKT1,IKBKG,DAPK2
GO:0043276	Anoikis	7	12	1.15	1.02	6.08e-05	9606.ENSP00000219476,9606.ENSP00000263967,9606.ENSP00000354558,9606.ENSP00000358335,9606.ENSP00000451828,9606.ENSP00000483825,9606.ENSP00000484390	TSC2,PIK3CA,MTOR,MAP3K7,AKT1,IKBKG,DAPK2
GO:0043278	Response to morphine	6	27	0.81	0.52	0.0064	FOSB,PPP1R1B,PRKCG,ADCY8,PRKCE,PPP2R2A
GO:0043278	Response to morphine	8	27	0.86	0.75	0.00054	9606.ENSP00000012443,9606.ENSP00000245919,9606.ENSP00000254079,9606.ENSP00000263431,9606.ENSP00000286355,9606.ENSP00000306124,9606.ENSP00000325074,9606.ENSP00000386884	PPP5C,FOSB,PPP1R1B,PRKCG,ADCY8,PRKCE,PPP2R2A,CXCR4
GO:0043279	Response to alkaloid	24	99	0.77	1.49	2.09e-09	9606.ENSP00000012443,9606.ENSP00000245919,9606.ENSP00000254079,9606.ENSP00000263431,9606.ENSP00000265164,9606.ENSP00000286355,9606.ENSP00000287820,9606.ENSP00000306124,9606.ENSP00000324173,9606.ENSP00000325074,9606.ENSP00000335153,9606.ENSP00000346148,9606.ENSP00000352608,9606.ENSP00000355192,9606.ENSP00000355533,9606.ENSP00000360609,9606.ENSP00000365230,9606.ENSP00000370421,9606.ENSP00000370571,…	PPP5C,FOSB,PPP1R1B,PRKCG,CASP6,ADCY8,PPARG,PRKCE,HSPA5,PPP2R2A,HSP90AA1,PRKAA1,RYR1,CACNA1S,RYR2,HSP90AB1,BCL2L1,PDX1,TH,PTK2B,SLC8A1,CXCR4,TRPV1,RYR3
GO:0043302	Positive regulation of leukocyte degranulation	5	26	0.75	0.39	0.0250	LAMP1,GAB2,SYK,ITGB2,ITGAM
GO:0043303	Mast cell degranulation	9	25	1.02	1.08	1.96e-05	CBL,KIT,RASGRP1,SYK,PIK3CD,S100A13,PIK3CG,LYN,BTK
GO:0043303	Mast cell degranulation	7	25	0.83	0.63	0.0019	9606.ENSP00000264033,9606.ENSP00000288135,9606.ENSP00000364898,9606.ENSP00000366563,9606.ENSP00000419260,9606.ENSP00000428924,9606.ENSP00000483570	CBL,KIT,SYK,PIK3CD,PIK3CG,LYN,BTK
GO:0043313	Regulation of neutrophil degranulation	3	8	1.04	0.37	0.0357	SYK,ITGB2,ITGAM
GO:0043313	Regulation of neutrophil degranulation	3	8	0.96	0.34	0.0453	9606.ENSP00000364898,9606.ENSP00000380948,9606.ENSP00000496959	SYK,ITGB2,ITGAM
GO:0043366	Beta selection	3	3	1.46	0.58	0.0064	ZAP70,SYK,RHOA
GO:0043366	Beta selection	3	3	1.38	0.54	0.0082	9606.ENSP00000264972,9606.ENSP00000364898,9606.ENSP00000400175	ZAP70,SYK,RHOA
GO:0043368	Positive T cell selection	7	30	0.75	0.55	0.0043	9606.ENSP00000264657,9606.ENSP00000264972,9606.ENSP00000300134,9606.ENSP00000354558,9606.ENSP00000357470,9606.ENSP00000381185,9606.ENSP00000419060	STAT3,ZAP70,STAT6,MTOR,IL6R,BCL2,BRAF
GO:0043369	CD4-positive or CD8-positive, alpha-beta T cell lineage commitment	6	18	0.91	0.63	0.0024	9606.ENSP00000264657,9606.ENSP00000300134,9606.ENSP00000354558,9606.ENSP00000357470,9606.ENSP00000381185,9606.ENSP00000419060	STAT3,STAT6,MTOR,IL6R,BCL2,BRAF
GO:0043372	Positive regulation of CD4-positive, alpha-beta T cell differentiation	9	33	0.82	0.78	0.00034	9606.ENSP00000220751,9606.ENSP00000228534,9606.ENSP00000231228,9606.ENSP00000254066,9606.ENSP00000321345,9606.ENSP00000363318,9606.ENSP00000367830,9606.ENSP00000470788,9606.ENSP00000497997	RIPK2,IL23A,IL12B,RARA,IL23R,IL2RG,PRKCZ,IL12RB1,MALT1
GO:0043382	Positive regulation of memory T cell differentiation	5	9	1.13	0.72	0.0013	9606.ENSP00000228534,9606.ENSP00000231228,9606.ENSP00000313875,9606.ENSP00000321345,9606.ENSP00000470788	IL23A,IL12B,CD46,IL23R,IL12RB1
GO:0043401	Steroid hormone mediated signaling pathway	15	77	0.75	1.03	6.34e-06	NR3C1,YWHAH,DAXX,MED1,PGR,ESR2,SRC,AR,JAK2,PPARA,KDM3A,RHOA,ESR1,RXRA,PTGES3
GO:0043405	Regulation of MAP kinase activity	40	185	0.8	2.13	1.56e-16	TAB1,DUSP1,FLT3,TRAF2,PDGFRB,NOX4,ERBB2,EGFR,PPARG,KIT,DUSP16,LRRK2,INSR,RASGRP1,PRKCD,MAP3K5,TLR9,AGT,DUSP10,MAP3K7,IRAK1,SRC,TLR4,AGER,SYK,PTK2B,MAP2K7,SOS1,TLR6,PTPN6,PIK3R5,FGFR1,HRAS,DUSP7,PIK3CG,LYN,TRAF6,MAP2K6,PIK3R6,PIK3CB
GO:0043405	Regulation of MAP kinase activity	48	185	0.8	2.35	1.52e-19	9606.ENSP00000216160,9606.ENSP00000221930,9606.ENSP00000239223,9606.ENSP00000241453,9606.ENSP00000247668,9606.ENSP00000252486,9606.ENSP00000260356,9606.ENSP00000261799,9606.ENSP00000269571,9606.ENSP00000275493,9606.ENSP00000280155,9606.ENSP00000282397,9606.ENSP00000284981,9606.ENSP00000287820,9606.ENSP00000288135,9606.ENSP00000298573,9606.ENSP00000303830,9606.ENSP00000326366,9606.ENSP00000331602,…	TAB1,TGFB1,DUSP1,FLT3,TRAF2,APOE,THBS1,PDGFRB,ERBB2,EGFR,ADRA2A,FLT1,APP,PPARG,KIT,DUSP16,INSR,PSEN1,PRKCD,MAP3K5,TLR9,AKAP13,AGT,DUSP10,MAP3K7,IRAK1,SRC,TLR4,SYK,PTK2B,MAP2K7,KSR1,RGS14,TLR6,PTPN6,PIK3R5,FGFR1,TNF,HRAS,TNXB,TRIB3,DUSP7,PIK3CG,LYN,TRAF6,MAP2K6,PIK3R6,PIK3CB
GO:0043406	Positive regulation of MAP kinase activity	29	116	0.86	2.02	2.28e-13	TAB1,FLT3,TRAF2,PDGFRB,NOX4,ERBB2,EGFR,KIT,LRRK2,INSR,RASGRP1,MAP3K5,TLR9,MAP3K7,IRAK1,SRC,TLR4,AGER,SYK,PTK2B,MAP2K7,TLR6,PIK3R5,FGFR1,HRAS,PIK3CG,TRAF6,MAP2K6,PIK3R6
GO:0043406	Positive regulation of MAP kinase activity	33	116	0.84	2.08	1.91e-14	9606.ENSP00000216160,9606.ENSP00000221930,9606.ENSP00000241453,9606.ENSP00000247668,9606.ENSP00000260356,9606.ENSP00000261799,9606.ENSP00000269571,9606.ENSP00000275493,9606.ENSP00000280155,9606.ENSP00000282397,9606.ENSP00000284981,9606.ENSP00000288135,9606.ENSP00000303830,9606.ENSP00000326366,9606.ENSP00000351908,9606.ENSP00000353874,9606.ENSP00000354718,9606.ENSP00000358335,9606.ENSP00000358997,…	TAB1,TGFB1,FLT3,TRAF2,THBS1,PDGFRB,ERBB2,EGFR,ADRA2A,FLT1,APP,KIT,INSR,PSEN1,MAP3K5,TLR9,AKAP13,MAP3K7,IRAK1,SRC,TLR4,SYK,PTK2B,MAP2K7,TLR6,PIK3R5,FGFR1,TNF,HRAS,PIK3CG,TRAF6,MAP2K6,PIK3R6
GO:0043434	Response to peptide hormone	68	355	0.75	2.42	1.20e-25	KCNQ1,PIK3R2,RPS6KB1,NFKB1,CDKN1B,MAPK14,JUND,SESN2,TLR2,CYBA,PIK3R3,GAB1,EEF2K,PIK3CA,SLC9A1,PIK3C2A,RB1,PXN,ADCY8,PPARG,TFF1,PRKCI,INPPL1,CRK,INSR,IRS1,FOS,ROCK2,SP1,PRKCD,PTK2,PDPK1,MAX,MTOR,AGT,RAB13,IRS4,EIF4EBP2,SRC,NR5A1,OGT,FOXO4,PFKFB1,IRS2,PRKCZ,CYBB,FOXO1,JAK2,AKT2,GRB2,ROCK1,RELA,PPARA,CREB1,SHC1,PIK3R1,LYN,JAK3,NR4A1,CPEB2,AKT1,ITGB3,TRPV1,CCNA2,IGF1R,GNAI1,JAK1,CAMK2A
GO:0043434	Response to peptide hormone	85	355	0.76	2.75	8.12e-33	9606.ENSP00000155840,9606.ENSP00000221930,9606.ENSP00000222254,9606.ENSP00000222330,9606.ENSP00000225577,9606.ENSP00000226413,9606.ENSP00000226574,9606.ENSP00000228872,9606.ENSP00000229795,9606.ENSP00000252818,9606.ENSP00000257430,9606.ENSP00000257904,9606.ENSP00000260010,9606.ENSP00000261623,9606.ENSP00000262741,9606.ENSP00000262995,9606.ENSP00000263026,9606.ENSP00000263967,9606.ENSP00000263980,…	KCNQ1,TGFB1,PIK3R2,GSK3A,RPS6KB1,GNRHR,NFKB1,CDKN1B,MAPK14,JUND,APC,CDK4,TLR2,CYBA,PIK3R3,GAB1,EEF2K,PIK3CA,SLC9A1,STAT3,PDE3B,ADCY8,PPARG,TFF1,WNT1,PRKCI,INPPL1,TSC1,STAT6,CRK,INSR,IRS1,FOS,PTPN2,EDNRA,STAT2,ROCK2,GSK3B,SP1,PRKCD,PTK2,PDPK1,STAT4,MAX,STAT1,MTOR,AGT,RAB13,AGTR2,IRS4,EIF4EBP2,SRC,NR5A1,OGT,FOXO4,PFKFB1,F7,IRS2,EDNRB,TBC1D4,PRKCZ,FOXO1,TH,JAK2,AKT2,ROCK1,RELA,PPARA,CREB1,AGTR1,SHC1…
GO:0043456	Regulation of pentose-phosphate shunt	4	6	1.29	0.68	0.0023	TP53,RPTOR,MTOR,MLST8
GO:0043456	Regulation of pentose-phosphate shunt	4	6	1.21	0.62	0.0035	9606.ENSP00000269305,9606.ENSP00000307272,9606.ENSP00000354558,9606.ENSP00000457870	TP53,RPTOR,MTOR,MLST8
GO:0043470	Regulation of carbohydrate catabolic process	14	55	0.87	1.22	1.01e-06	EP300,NCOR1,TP53,FLCN,PRKAG2,INSR,RPTOR,PRKAG1,PRKAA1,MTOR,PRKAA2,OGT,PPARA,MLST8
GO:0043470	Regulation of carbohydrate catabolic process	18	55	0.9	1.56	8.11e-09	9606.ENSP00000222330,9606.ENSP00000263253,9606.ENSP00000264657,9606.ENSP00000268712,9606.ENSP00000269305,9606.ENSP00000284981,9606.ENSP00000287878,9606.ENSP00000303830,9606.ENSP00000307272,9606.ENSP00000323867,9606.ENSP00000326366,9606.ENSP00000346148,9606.ENSP00000354558,9606.ENSP00000360290,9606.ENSP00000362824,9606.ENSP00000385523,9606.ENSP00000437955,9606.ENSP00000457870	GSK3A,EP300,STAT3,NCOR1,TP53,APP,PRKAG2,INSR,RPTOR,PRKAG1,PSEN1,PRKAA1,MTOR,PRKAA2,OGT,PPARA,HIF1A,MLST8
GO:0043471	Regulation of cellular carbohydrate catabolic process	5	13	0.97	0.58	0.0043	9606.ENSP00000222330,9606.ENSP00000269305,9606.ENSP00000307272,9606.ENSP00000354558,9606.ENSP00000457870	GSK3A,TP53,RPTOR,MTOR,MLST8
GO:0043491	Protein kinase B signaling	14	53	0.89	1.26	7.01e-07	RPS6KB1,SESN2,PIK3R3,KDR,PIK3CA,FLCN,RPS6KB2,CD28,DLG1,PIK3C2B,PTEN,AKT2,ILK,AKT1
GO:0043491	Protein kinase B signaling	18	53	0.91	1.61	5.05e-09	9606.ENSP00000219476,9606.ENSP00000221930,9606.ENSP00000225577,9606.ENSP00000262741,9606.ENSP00000263923,9606.ENSP00000263967,9606.ENSP00000308413,9606.ENSP00000324890,9606.ENSP00000345731,9606.ENSP00000356155,9606.ENSP00000357804,9606.ENSP00000361021,9606.ENSP00000361275,9606.ENSP00000370253,9606.ENSP00000375892,9606.ENSP00000379975,9606.ENSP00000398698,9606.ENSP00000451828	TSC2,TGFB1,RPS6KB1,PIK3R3,KDR,PIK3CA,RPS6KB2,CD28,DLG1,PIK3C2B,THEM4,PTEN,PLK3,NKX3-1,AKT2,ILK,TNF,AKT1
GO:0043502	Regulation of muscle adaptation	19	81	0.83	1.44	1.78e-08	RPS6KB1,SLC9A1,PPARG,NOS3,ROCK2,SCN5A,SMAD3,FOXO3,ATP2B4,AGT,FOXO1,IL6ST,PPP3CA,CAMK2B,ROCK1,PPARA,PRKAG3,PRKCA,CAMK2D
GO:0043502	Regulation of muscle adaptation	22	81	0.82	1.55	2.01e-09	9606.ENSP00000162749,9606.ENSP00000222330,9606.ENSP00000225577,9606.ENSP00000263980,9606.ENSP00000287820,9606.ENSP00000297494,9606.ENSP00000317985,9606.ENSP00000328968,9606.ENSP00000332973,9606.ENSP00000339527,9606.ENSP00000350310,9606.ENSP00000355627,9606.ENSP00000368880,9606.ENSP00000369960,9606.ENSP00000370698,9606.ENSP00000378323,9606.ENSP00000379098,9606.ENSP00000382697,9606.ENSP00000385523,…	TNFRSF1A,GSK3A,RPS6KB1,SLC9A1,PPARG,NOS3,ROCK2,SCN5A,SMAD3,FOXO3,ATP2B4,AGT,FOXO1,ADRA1A,IL6ST,PPP3CA,CAMK2B,ROCK1,PPARA,PRKAG3,PRKCA,CAMK2D
GO:0043506	Regulation of JUN kinase activity	12	60	0.77	0.88	6.21e-05	TRAF2,DUSP16,MAP3K5,TLR9,DUSP10,MAP3K7,AGER,SYK,PTK2B,MAP2K7,TLR6,TRAF6
GO:0043507	Positive regulation of JUN kinase activity	10	42	0.84	0.88	0.00010	TRAF2,MAP3K5,TLR9,MAP3K7,AGER,SYK,PTK2B,MAP2K7,TLR6,TRAF6
GO:0043507	Positive regulation of JUN kinase activity	10	42	0.76	0.76	0.00034	9606.ENSP00000247668,9606.ENSP00000351908,9606.ENSP00000353874,9606.ENSP00000358335,9606.ENSP00000364898,9606.ENSP00000380638,9606.ENSP00000381070,9606.ENSP00000389600,9606.ENSP00000398698,9606.ENSP00000433623	TRAF2,MAP3K5,TLR9,MAP3K7,SYK,PTK2B,MAP2K7,TLR6,TNF,TRAF6
GO:0043525	Positive regulation of neuron apoptotic process	11	54	0.77	0.83	0.00013	NR3C1,ATF2,TP53,BAX,ATF4,FOXO3,MAP2K7,RHOA,MAP2K4,DDIT3,ITGAM
GO:0043525	Positive regulation of neuron apoptotic process	18	54	0.91	1.58	6.38e-09	9606.ENSP00000222330,9606.ENSP00000231509,9606.ENSP00000264110,9606.ENSP00000269305,9606.ENSP00000282588,9606.ENSP00000284981,9606.ENSP00000293288,9606.ENSP00000330237,9606.ENSP00000336790,9606.ENSP00000339527,9606.ENSP00000376943,9606.ENSP00000381070,9606.ENSP00000398698,9606.ENSP00000400175,9606.ENSP00000410402,9606.ENSP00000448665,9606.ENSP00000495360,9606.ENSP00000496959	GSK3A,NR3C1,ATF2,TP53,ITGA1,APP,BAX,CASP9,ATF4,FOXO3,BCL2L11,MAP2K7,TNF,RHOA,MAP2K4,DDIT3,CTNNB1,ITGAM
GO:0043534	Blood vessel endothelial cell migration	7	31	0.82	0.61	0.0024	PIK3R3,KDR,AMOT,ITGB1,PTK2B,NR4A1,AKT1
GO:0043535	Regulation of blood vessel endothelial cell migration	23	90	0.79	1.51	2.10e-09	9606.ENSP00000221930,9606.ENSP00000244007,9606.ENSP00000252486,9606.ENSP00000260356,9606.ENSP00000263923,9606.ENSP00000287820,9606.ENSP00000297494,9606.ENSP00000329357,9606.ENSP00000344220,9606.ENSP00000345083,9606.ENSP00000350310,9606.ENSP00000360973,9606.ENSP00000377055,9606.ENSP00000390535,9606.ENSP00000393312,9606.ENSP00000393333,9606.ENSP00000393978,9606.ENSP00000398698,9606.ENSP00000400175,…	TGFB1,PLCG1,APOE,THBS1,KDR,PPARG,NOS3,SP1,PDPK1,MAP2K3,ATP2B4,AGTR2,PRCP,PRKD1,FGFR1,TBXA2R,PRKD2,TNF,RHOA,PRKCA,HIF1A,AKT1,AKT3
GO:0043536	Positive regulation of blood vessel endothelial cell migration	12	53	0.82	0.98	2.18e-05	PLCG1,KDR,PIK3C2A,NOS3,SP1,PDPK1,MAP2K3,AMOT,FGFR1,PRKCA,AKT1,AKT3
GO:0043536	Positive regulation of blood vessel endothelial cell migration	15	53	0.84	1.21	8.81e-07	9606.ENSP00000221930,9606.ENSP00000244007,9606.ENSP00000260356,9606.ENSP00000263923,9606.ENSP00000297494,9606.ENSP00000329357,9606.ENSP00000344220,9606.ENSP00000345083,9606.ENSP00000390535,9606.ENSP00000393312,9606.ENSP00000393978,9606.ENSP00000408695,9606.ENSP00000437955,9606.ENSP00000451828,9606.ENSP00000500582	TGFB1,PLCG1,THBS1,KDR,NOS3,SP1,PDPK1,MAP2K3,PRKD1,FGFR1,PRKD2,PRKCA,HIF1A,AKT1,AKT3
GO:0043537	Negative regulation of blood vessel endothelial cell migration	9	35	0.79	0.74	0.00048	9606.ENSP00000221930,9606.ENSP00000252486,9606.ENSP00000260356,9606.ENSP00000287820,9606.ENSP00000350310,9606.ENSP00000360973,9606.ENSP00000393333,9606.ENSP00000398698,9606.ENSP00000400175	TGFB1,APOE,THBS1,PPARG,ATP2B4,AGTR2,TBXA2R,TNF,RHOA
GO:0043542	Endothelial cell migration	16	69	0.83	1.26	3.73e-07	PIK3R3,KDR,PIK3CA,PXN,S100P,NOS3,DPP4,RAB13,PTEN,AMOT,ITGB1,PTK2B,ITGB2,RHOA,NR4A1,AKT1
GO:0043549	Regulation of kinase activity	156	778	0.77	3.21	2.14e-64	GADD45B,TAB1,PIK3R2,DUSP3,IL2,CCND1,CDKN1B,NPRL2,SLC8A2,DUSP1,FLT3,CDC25B,TRAF2,SESN2,PPP1R1B,CCNB1,CAMK1,PDGFRA,SPDYE1,PDGFRB,PKMYT1,TELO2,SLC9A3R1,PIK3R3,MAP2K2,NOX4,KDR,PIK3CA,CBL,RAPGEF2,CENPE,PRKAR2A,PRKAR2B,DAXX,ERBB3,RB1,IQGAP1,ERBB2,EGFR,DEPTOR,ADCY8,PPARG,PRKAG2,KIT,CCNB2,NCF1,CALM3,FGFR4,DUSP16,LRRK2,PLK1,TPX2,MAP2K1,CDC25A,INSR,IRS1,RPTOR,RASGRP1,CKS1B,CD19,MET,CDC25C,PRKAG1,SPDYE3,PRK…
GO:0043550	Regulation of lipid kinase activity	24	71	0.99	2.26	2.04e-13	PIK3R2,FLT3,PDGFRA,PDGFRB,PIK3R3,RB1,KIT,IRS1,CD19,FGFR3,PTK2,ERBB4,PIP4K2C,VAV3,VAV2,SRC,PIP4K2A,PTK2B,PIK3R5,PIK3R1,LYN,PIK3R6,PIP4K2B,CDC42
GO:0043550	Regulation of lipid kinase activity	29	71	0.99	2.57	5.31e-16	9606.ENSP00000221930,9606.ENSP00000222254,9606.ENSP00000241453,9606.ENSP00000257290,9606.ENSP00000261799,9606.ENSP00000262741,9606.ENSP00000282397,9606.ENSP00000284981,9606.ENSP00000288135,9606.ENSP00000304895,9606.ENSP00000308541,9606.ENSP00000313419,9606.ENSP00000341189,9606.ENSP00000342235,9606.ENSP00000347032,9606.ENSP00000359073,9606.ENSP00000360916,9606.ENSP00000362680,9606.ENSP00000363117,…	TGFB1,PIK3R2,FLT3,PDGFRA,PDGFRB,PIK3R3,FLT1,APP,KIT,IRS1,F2,CD19,PTK2,ERBB4,PIP4K2C,VAV3,VAV2,SRC,FGR,PIP4K2A,PTK2B,PRKD1,PIK3R5,PIK3R1,LYN,AMBRA1,PIK3R6,PIP4K2B,CDC42
GO:0043551	Regulation of phosphatidylinositol 3-kinase activity	20	59	0.99	1.99	3.02e-11	PIK3R2,FLT3,PDGFRA,PDGFRB,PIK3R3,KIT,IRS1,CD19,FGFR3,PTK2,ERBB4,VAV3,VAV2,SRC,PTK2B,PIK3R5,PIK3R1,LYN,PIK3R6,CDC42
GO:0043551	Regulation of phosphatidylinositol 3-kinase activity	25	59	1.01	2.39	4.14e-14	9606.ENSP00000221930,9606.ENSP00000222254,9606.ENSP00000241453,9606.ENSP00000257290,9606.ENSP00000261799,9606.ENSP00000262741,9606.ENSP00000282397,9606.ENSP00000284981,9606.ENSP00000288135,9606.ENSP00000304895,9606.ENSP00000313419,9606.ENSP00000341189,9606.ENSP00000342235,9606.ENSP00000359073,9606.ENSP00000360916,9606.ENSP00000362680,9606.ENSP00000363117,9606.ENSP00000380638,9606.ENSP00000390535,…	TGFB1,PIK3R2,FLT3,PDGFRA,PDGFRB,PIK3R3,FLT1,APP,KIT,IRS1,CD19,PTK2,ERBB4,VAV3,VAV2,SRC,FGR,PTK2B,PRKD1,PIK3R5,PIK3R1,LYN,AMBRA1,PIK3R6,CDC42
GO:0043552	Positive regulation of phosphatidylinositol 3-kinase activity	15	35	1.1	1.87	1.30e-09	FLT3,PDGFRA,PDGFRB,KIT,IRS1,CD19,FGFR3,PTK2,ERBB4,VAV3,VAV2,SRC,PTK2B,LYN,CDC42
GO:0043552	Positive regulation of phosphatidylinositol 3-kinase activity	20	35	1.14	2.48	3.60e-13	9606.ENSP00000221930,9606.ENSP00000241453,9606.ENSP00000257290,9606.ENSP00000261799,9606.ENSP00000282397,9606.ENSP00000284981,9606.ENSP00000288135,9606.ENSP00000304895,9606.ENSP00000313419,9606.ENSP00000341189,9606.ENSP00000342235,9606.ENSP00000359073,9606.ENSP00000360916,9606.ENSP00000362680,9606.ENSP00000363117,9606.ENSP00000380638,9606.ENSP00000390535,9606.ENSP00000428924,9606.ENSP00000431926,…	TGFB1,FLT3,PDGFRA,PDGFRB,FLT1,APP,KIT,IRS1,CD19,PTK2,ERBB4,VAV3,VAV2,SRC,FGR,PTK2B,PRKD1,LYN,AMBRA1,CDC42
GO:0043620	Regulation of DNA-templated transcription in response to stress	13	55	0.76	0.93	2.94e-05	9606.ENSP00000078445,9606.ENSP00000269305,9606.ENSP00000324173,9606.ENSP00000336790,9606.ENSP00000360266,9606.ENSP00000368884,9606.ENSP00000384273,9606.ENSP00000386229,9606.ENSP00000435412,9606.ENSP00000437955,9606.ENSP00000444198,9606.ENSP00000448665,9606.ENSP00000481956	CREB3L3,TP53,HSPA5,ATF4,JUN,RPS6KA3,RELA,RGS14,RPS6KA1,HIF1A,CITED2,DDIT3,CREB3L1
GO:0043666	Regulation of phosphoprotein phosphatase activity	19	58	0.9	1.63	2.72e-09	9606.ENSP00000254079,9606.ENSP00000261799,9606.ENSP00000275364,9606.ENSP00000282588,9606.ENSP00000291295,9606.ENSP00000298552,9606.ENSP00000299767,9606.ENSP00000312999,9606.ENSP00000317985,9606.ENSP00000324806,9606.ENSP00000354558,9606.ENSP00000360609,9606.ENSP00000360973,9606.ENSP00000371067,9606.ENSP00000382697,9606.ENSP00000398698,9606.ENSP00000430684,9606.ENSP00000499717,9606.ENSP00000499797	PPP1R1B,PDGFRB,GNA12,ITGA1,CALM3,TSC1,HSP90B1,GNAI2,ROCK2,GSK3B,MTOR,HSP90AB1,AGTR2,JAK2,ROCK1,TNF,IKBKB,CALM1,CALM2
GO:0044062	Regulation of excretion	8	22	0.94	0.86	0.00018	9606.ENSP00000262613,9606.ENSP00000299178,9606.ENSP00000312999,9606.ENSP00000355627,9606.ENSP00000366416,9606.ENSP00000369647,9606.ENSP00000398832,9606.ENSP00000496396	SLC9A3R1,AVPR1A,GNAI2,AGT,EDNRB,AVP,AGTR1,AVPR2
GO:0044342	Type B pancreatic cell proliferation	4	14	0.92	0.42	0.0200	IRS2,PDX1,BAD,RASGRF1
GO:0044342	Type B pancreatic cell proliferation	4	14	0.84	0.38	0.0287	9606.ENSP00000365016,9606.ENSP00000370421,9606.ENSP00000378040,9606.ENSP00000405963	IRS2,PDX1,BAD,RASGRF1
GO:0044770	Cell cycle phase transition	38	183	0.78	2.0	3.17e-15	AURKA,RPS6KB1,CCND1,CDKN1B,CDC25B,CCNB1,NDC80,PKMYT1,CDK2,RB1,SKP2,BUB1B,CCNB2,CALM3,PLK1,BIRC5,CDC25A,CKS1B,ANAPC2,CDC25C,SPDYA,ANAPC1,EIF4EBP1,CDC16,UBE2C,CKS2,CCNB3,PPP3CA,CDC23,CDK1,ITGB1,ANAPC7,PPP2R2D,CDC27,CCNA2,CALM1,CALM2,CAMK2A
GO:0044772	Mitotic cell cycle phase transition	37	173	0.79	2.03	3.55e-15	AURKA,RPS6KB1,CCND1,CDKN1B,CDC25B,CCNB1,PKMYT1,CDK2,RB1,SKP2,BUB1B,CCNB2,CALM3,PLK1,BIRC5,CDC25A,CKS1B,ANAPC2,CDC25C,SPDYA,ANAPC1,EIF4EBP1,CDC16,UBE2C,CKS2,CCNB3,PPP3CA,CDC23,CDK1,ITGB1,ANAPC7,PPP2R2D,CDC27,CCNA2,CALM1,CALM2,CAMK2A
GO:0044839	Cell cycle G2/M phase transition	17	62	0.9	1.51	1.85e-08	AURKA,CDC25B,CCNB1,NDC80,PKMYT1,CDK2,SKP2,CCNB2,CALM3,PLK1,BIRC5,CDC25A,CDC25C,CDK1,CCNA2,CALM1,CALM2
GO:0045058	T cell selection	10	43	0.75	0.74	0.00040	9606.ENSP00000264657,9606.ENSP00000264972,9606.ENSP00000300134,9606.ENSP00000324890,9606.ENSP00000354558,9606.ENSP00000357470,9606.ENSP00000364898,9606.ENSP00000381185,9606.ENSP00000400175,9606.ENSP00000419060	STAT3,ZAP70,STAT6,CD28,MTOR,IL6R,SYK,BCL2,RHOA,BRAF
GO:0045066	Regulatory T cell differentiation	3	7	1.02	0.37	0.0352	9606.ENSP00000221930,9606.ENSP00000324890,9606.ENSP00000363318	TGFB1,CD28,IL2RG
GO:0045116	Protein neddylation	9	22	1.0	1.04	2.77e-05	9606.ENSP00000216225,9606.ENSP00000268717,9606.ENSP00000292782,9606.ENSP00000299259,9606.ENSP00000304102,9606.ENSP00000346340,9606.ENSP00000350512,9606.ENSP00000376167,9606.ENSP00000424655	RBX1,COPS3,DCUN1D1,COPS2,COPS6,COPS8,COPS5,GPS1,COPS4
GO:0045123	Cellular extravasation	10	43	0.83	0.86	0.00012	ITGB7,CRK,CRKL,ITGAL,PIK3CD,ITGB1,ITGA4,ITGB2,ROCK1,PIK3CG
GO:0045123	Cellular extravasation	15	43	0.93	1.43	1.01e-07	9606.ENSP00000215637,9606.ENSP00000267082,9606.ENSP00000282588,9606.ENSP00000294728,9606.ENSP00000300574,9606.ENSP00000346300,9606.ENSP00000349252,9606.ENSP00000366563,9606.ENSP00000379350,9606.ENSP00000380227,9606.ENSP00000380948,9606.ENSP00000382697,9606.ENSP00000383376,9606.ENSP00000398698,9606.ENSP00000419260	MADCAM1,ITGB7,ITGA1,VCAM1,CRK,CRKL,ITGAL,PIK3CD,ITGB1,ITGA4,ITGB2,ROCK1,JAM2,TNF,PIK3CG
GO:0045198	Establishment of epithelial cell apical/basal polarity	4	17	0.76	0.33	0.0473	9606.ENSP00000262613,9606.ENSP00000353408,9606.ENSP00000400175,9606.ENSP00000497733	SLC9A3R1,MSN,RHOA,CDC42
GO:0045428	Regulation of nitric oxide biosynthetic process	16	59	0.9	1.43	6.28e-08	TICAM1,INSR,ROCK2,SMAD3,HSP90AA1,ATP2B4,AGT,TLR4,JAK2,PTK2B,ITGB2,TLR6,ESR1,AKT1,TRPV1,TLR5
GO:0045428	Regulation of nitric oxide biosynthetic process	22	59	0.96	1.99	1.36e-11	9606.ENSP00000248244,9606.ENSP00000284981,9606.ENSP00000303830,9606.ENSP00000307188,9606.ENSP00000317985,9606.ENSP00000332973,9606.ENSP00000335153,9606.ENSP00000350310,9606.ENSP00000355361,9606.ENSP00000355627,9606.ENSP00000360609,9606.ENSP00000360973,9606.ENSP00000363089,9606.ENSP00000371067,9606.ENSP00000380638,9606.ENSP00000380948,9606.ENSP00000389600,9606.ENSP00000398698,9606.ENSP00000405330,…	TICAM1,APP,INSR,ASL,ROCK2,SMAD3,HSP90AA1,ATP2B4,CD47,AGT,HSP90AB1,AGTR2,TLR4,JAK2,PTK2B,ITGB2,TLR6,TNF,ESR1,AKT1,TRPV1,TLR5
GO:0045429	Positive regulation of nitric oxide biosynthetic process	14	43	0.98	1.47	8.72e-08	TICAM1,INSR,SMAD3,HSP90AA1,AGT,TLR4,JAK2,PTK2B,ITGB2,TLR6,ESR1,AKT1,TRPV1,TLR5
GO:0045429	Positive regulation of nitric oxide biosynthetic process	19	43	1.03	2.02	4.75e-11	9606.ENSP00000248244,9606.ENSP00000284981,9606.ENSP00000303830,9606.ENSP00000307188,9606.ENSP00000332973,9606.ENSP00000335153,9606.ENSP00000355627,9606.ENSP00000360609,9606.ENSP00000360973,9606.ENSP00000363089,9606.ENSP00000371067,9606.ENSP00000380638,9606.ENSP00000380948,9606.ENSP00000389600,9606.ENSP00000398698,9606.ENSP00000405330,9606.ENSP00000451828,9606.ENSP00000459962,9606.ENSP00000496355	TICAM1,APP,INSR,ASL,SMAD3,HSP90AA1,AGT,HSP90AB1,AGTR2,TLR4,JAK2,PTK2B,ITGB2,TLR6,TNF,ESR1,AKT1,TRPV1,TLR5
GO:0045577	Regulation of B cell differentiation	7	32	0.8	0.59	0.0028	IL2,TLR9,SYK,BAD,PTPN6,INPP5D,BTK
GO:0045577	Regulation of B cell differentiation	8	32	0.78	0.66	0.0013	9606.ENSP00000226730,9606.ENSP00000353874,9606.ENSP00000363318,9606.ENSP00000364898,9606.ENSP00000378040,9606.ENSP00000391592,9606.ENSP00000405338,9606.ENSP00000483570	IL2,TLR9,IL2RG,SYK,BAD,PTPN6,INPP5D,BTK
GO:0045579	Positive regulation of B cell differentiation	5	15	0.99	0.59	0.0041	IL2,SYK,BAD,INPP5D,BTK
GO:0045579	Positive regulation of B cell differentiation	6	15	0.99	0.7	0.0012	9606.ENSP00000226730,9606.ENSP00000363318,9606.ENSP00000364898,9606.ENSP00000378040,9606.ENSP00000405338,9606.ENSP00000483570	IL2,IL2RG,SYK,BAD,INPP5D,BTK
GO:0045589	Regulation of regulatory T cell differentiation	8	34	0.76	0.62	0.0019	9606.ENSP00000221930,9606.ENSP00000226730,9606.ENSP00000313875,9606.ENSP00000324890,9606.ENSP00000339527,9606.ENSP00000355866,9606.ENSP00000363318,9606.ENSP00000431926	TGFB1,IL2,CD46,CD28,FOXO3,DUSP10,IL2RG,AMBRA1
GO:0045591	Positive regulation of regulatory T cell differentiation	7	23	0.87	0.67	0.0013	9606.ENSP00000221930,9606.ENSP00000226730,9606.ENSP00000313875,9606.ENSP00000339527,9606.ENSP00000355866,9606.ENSP00000363318,9606.ENSP00000431926	TGFB1,IL2,CD46,FOXO3,DUSP10,IL2RG,AMBRA1
GO:0045601	Regulation of endothelial cell differentiation	9	35	0.79	0.74	0.00048	9606.ENSP00000162749,9606.ENSP00000234071,9606.ENSP00000317985,9606.ENSP00000365006,9606.ENSP00000382697,9606.ENSP00000398698,9606.ENSP00000430684,9606.ENSP00000495360,9606.ENSP00000496438	TNFRSF1A,PROC,ROCK2,S1PR3,ROCK1,TNF,IKBKB,CTNNB1,S1PR2
GO:0045622	Regulation of T-helper cell differentiation	11	42	0.8	0.89	7.11e-05	9606.ENSP00000220751,9606.ENSP00000226730,9606.ENSP00000228534,9606.ENSP00000231228,9606.ENSP00000254066,9606.ENSP00000303315,9606.ENSP00000321345,9606.ENSP00000367830,9606.ENSP00000432511,9606.ENSP00000470788,9606.ENSP00000497997	RIPK2,IL2,IL23A,IL12B,RARA,JUNB,IL23R,PRKCZ,JAK3,IL12RB1,MALT1
GO:0045624	Positive regulation of T-helper cell differentiation	8	22	0.94	0.86	0.00018	9606.ENSP00000220751,9606.ENSP00000228534,9606.ENSP00000231228,9606.ENSP00000254066,9606.ENSP00000321345,9606.ENSP00000367830,9606.ENSP00000470788,9606.ENSP00000497997	RIPK2,IL23A,IL12B,RARA,IL23R,PRKCZ,IL12RB1,MALT1
GO:0045672	Positive regulation of osteoclast differentiation	8	26	0.87	0.77	0.00044	9606.ENSP00000228534,9606.ENSP00000231228,9606.ENSP00000306245,9606.ENSP00000321345,9606.ENSP00000378323,9606.ENSP00000387699,9606.ENSP00000398698,9606.ENSP00000433623	IL23A,IL12B,FOS,IL23R,PPP3CA,CREB1,TNF,TRAF6
GO:0045722	Positive regulation of gluconeogenesis	5	16	0.88	0.51	0.0083	9606.ENSP00000264867,9606.ENSP00000301764,9606.ENSP00000311857,9606.ENSP00000368880,9606.ENSP00000385523	PPARGC1A,DDB1,PTPN2,FOXO1,PPARA
GO:0045725	Positive regulation of glycogen biosynthetic process	5	15	0.99	0.59	0.0041	INSR,IRS1,IRS2,AKT2,AKT1
GO:0045725	Positive regulation of glycogen biosynthetic process	5	15	0.91	0.53	0.0068	9606.ENSP00000303830,9606.ENSP00000304895,9606.ENSP00000365016,9606.ENSP00000375892,9606.ENSP00000451828	INSR,IRS1,IRS2,AKT2,AKT1
GO:0045730	Respiratory burst	10	23	1.1	1.33	1.42e-06	RAC2,CYBA,NCF1,RAC3,NCF2,NOX1,PIK3CD,CYBB,NCF4,PIK3CG
GO:0045730	Respiratory burst	6	23	0.8	0.52	0.0062	9606.ENSP00000249071,9606.ENSP00000261623,9606.ENSP00000304283,9606.ENSP00000365012,9606.ENSP00000366563,9606.ENSP00000419260	RAC2,CYBA,RAC3,HCK,PIK3CD,PIK3CG
GO:0045737	Positive regulation of cyclin-dependent protein serine/threonine kinase activity	16	47	1.0	1.69	4.47e-09	CCND1,CDKN1B,CCNB1,SPDYE1,EGFR,CKS1B,SPDYE3,SPDYA,SRC,CKS2,SPDYE2,SPDYE2B,AKT1,SPDYE6,SPDYE5,SPDYE16
GO:0045760	Positive regulation of action potential	4	8	1.08	0.54	0.0070	9606.ENSP00000263980,9606.ENSP00000328968,9606.ENSP00000369960,9606.ENSP00000398698	SLC9A1,SCN5A,ADRA1A,TNF
GO:0045762	Positive regulation of adenylate cyclase activity	8	39	0.78	0.64	0.0016	CACNA1C,CACNA1D,CALM3,AKAP5,RAF1,ORAI1,CALM1,CALM2
GO:0045762	Positive regulation of adenylate cyclase activity	10	39	0.79	0.81	0.00020	9606.ENSP00000266376,9606.ENSP00000288139,9606.ENSP00000291295,9606.ENSP00000315011,9606.ENSP00000378207,9606.ENSP00000401888,9606.ENSP00000482568,9606.ENSP00000496396,9606.ENSP00000499717,9606.ENSP00000499797	CACNA1C,CACNA1D,CALM3,EDNRA,AKAP5,RAF1,ORAI1,AVPR2,CALM1,CALM2
GO:0045777	Positive regulation of blood pressure	11	36	0.87	1.01	2.24e-05	9606.ENSP00000261623,9606.ENSP00000299178,9606.ENSP00000306662,9606.ENSP00000355627,9606.ENSP00000368766,9606.ENSP00000369647,9606.ENSP00000369960,9606.ENSP00000393333,9606.ENSP00000400175,9606.ENSP00000480573,9606.ENSP00000496396	CYBA,AVPR1A,ADRA1B,AGT,ADRA1D,AVP,ADRA1A,TBXA2R,RHOA,ADRA2B,AVPR2
GO:0045780	Positive regulation of bone resorption	4	19	0.79	0.34	0.0446	SRC,SYK,PRKCA,ITGB3
GO:0045780	Positive regulation of bone resorption	5	19	0.8	0.45	0.0144	9606.ENSP00000362680,9606.ENSP00000364898,9606.ENSP00000378517,9606.ENSP00000408695,9606.ENSP00000452786	SRC,SYK,SPP1,PRKCA,ITGB3
GO:0045792	Negative regulation of cell size	5	9	1.21	0.78	0.00077	DEPTOR,MTOR,PTEN,AKT1S1,RHOA
GO:0045792	Negative regulation of cell size	7	9	1.27	1.17	1.71e-05	9606.ENSP00000286234,9606.ENSP00000298552,9606.ENSP00000354558,9606.ENSP00000361021,9606.ENSP00000375711,9606.ENSP00000400175,9606.ENSP00000496414	DEPTOR,TSC1,MTOR,PTEN,AKT1S1,RHOA,RDX
GO:0045821	Positive regulation of glycolytic process	6	21	0.92	0.63	0.0023	INSR,RPTOR,PRKAA1,MTOR,PRKAA2,MLST8
GO:0045821	Positive regulation of glycolytic process	9	21	1.02	1.07	2.10e-05	9606.ENSP00000284981,9606.ENSP00000303830,9606.ENSP00000307272,9606.ENSP00000326366,9606.ENSP00000346148,9606.ENSP00000354558,9606.ENSP00000360290,9606.ENSP00000437955,9606.ENSP00000457870	APP,INSR,RPTOR,PSEN1,PRKAA1,MTOR,PRKAA2,HIF1A,MLST8
GO:0045822	Negative regulation of heart contraction	5	23	0.8	0.43	0.0167	IL2,PLN,JAK2,PIK3CG,TRPV1
GO:0045822	Negative regulation of heart contraction	8	23	0.93	0.84	0.00023	9606.ENSP00000226730,9606.ENSP00000350132,9606.ENSP00000360973,9606.ENSP00000369960,9606.ENSP00000371067,9606.ENSP00000398698,9606.ENSP00000419260,9606.ENSP00000459962	IL2,PLN,AGTR2,ADRA1A,JAK2,TNF,PIK3CG,TRPV1
GO:0045823	Positive regulation of heart contraction	10	39	0.79	0.81	0.00020	9606.ENSP00000155840,9606.ENSP00000222330,9606.ENSP00000299178,9606.ENSP00000306662,9606.ENSP00000335153,9606.ENSP00000355533,9606.ENSP00000361965,9606.ENSP00000368766,9606.ENSP00000369960,9606.ENSP00000389326	KCNQ1,GSK3A,AVPR1A,ADRA1B,HSP90AA1,RYR2,ADA,ADRA1D,ADRA1A,ACE2
GO:0045834	Positive regulation of lipid metabolic process	42	155	0.82	2.28	1.08e-17	9606.ENSP00000221930,9606.ENSP00000241453,9606.ENSP00000252486,9606.ENSP00000257290,9606.ENSP00000261799,9606.ENSP00000264867,9606.ENSP00000282397,9606.ENSP00000284981,9606.ENSP00000287820,9606.ENSP00000288135,9606.ENSP00000299178,9606.ENSP00000304895,9606.ENSP00000306124,9606.ENSP00000307272,9606.ENSP00000308541,9606.ENSP00000313419,9606.ENSP00000331602,9606.ENSP00000341189,9606.ENSP00000342235,…	TGFB1,FLT3,APOE,PDGFRA,PDGFRB,PPARGC1A,FLT1,APP,PPARG,KIT,AVPR1A,IRS1,PRKCE,RPTOR,F2,CD19,PRKCD,PTK2,ERBB4,PRKAA1,MTOR,VAV3,VAV2,SRC,FGR,IRS2,AVP,AKT2,PTK2B,PPARA,CREB1,PRKD1,TNF,LYN,AMBRA1,APOA5,AKT1,MLST8,APOC1,APOC2,IGF1R,CDC42
GO:0045840	Positive regulation of mitotic nuclear division	11	45	0.85	0.97	3.07e-05	AURKA,DLGAP5,PDGFRB,ANAPC5,RB1,INSR,CD28,CDC16,CDC23,ANAPC7,CDC27
GO:0045842	Positive regulation of mitotic metaphase/anaphase transition	7	15	1.13	1.0	7.25e-05	DLGAP5,ANAPC5,RB1,CDC16,CDC23,ANAPC7,CDC27
GO:0045859	Regulation of protein kinase activity	129	663	0.75	2.99	4.19e-51	GADD45B,TAB1,DUSP3,CCND1,CDKN1B,SLC8A2,DUSP1,FLT3,CDC25B,TRAF2,SESN2,PPP1R1B,CCNB1,CAMK1,SPDYE1,PDGFRB,PKMYT1,TELO2,SLC9A3R1,MAP2K2,NOX4,PIK3CA,CBL,RAPGEF2,CENPE,PRKAR2A,PRKAR2B,DAXX,ERBB3,RB1,IQGAP1,ERBB2,EGFR,DEPTOR,ADCY8,PPARG,PRKAG2,KIT,CCNB2,NCF1,CALM3,DUSP16,LRRK2,PLK1,TPX2,MAP2K1,CDC25A,INSR,RPTOR,RASGRP1,CKS1B,CDC25C,PRKAG1,SPDYE3,PRKCD,HSP90AA1,SPDYA,SFN,PTK2,ERBB4,PDPK1,MAP2K3,DLG1,ATP2…
GO:0045860	Positive regulation of protein kinase activity	88	416	0.79	2.91	2.06e-36	TAB1,CCND1,CDKN1B,SLC8A2,FLT3,CDC25B,TRAF2,CCNB1,CAMK1,SPDYE1,PDGFRB,TELO2,MAP2K2,NOX4,PIK3CA,RAPGEF2,CENPE,DAXX,ERBB3,IQGAP1,ERBB2,EGFR,ADCY8,PRKAG2,KIT,NCF1,CALM3,LRRK2,TPX2,MAP2K1,INSR,RPTOR,RASGRP1,CKS1B,PRKAG1,SPDYE3,PRKCD,HSP90AA1,SPDYA,PTK2,ERBB4,PDPK1,MAP2K3,DLG1,ATP2B4,MAP3K5,TLR9,MTOR,AGT,KIF14,TAB2,MAP3K7,RAP1A,IRAK1,DAB1,SRC,TLR4,AGER,SYK,CKS2,PRKCZ,JAK2,CAMKK1,ALK,TIRAP,PTK2B,MAP2K7,…
GO:0045898	Regulation of RNA polymerase II transcription preinitiation complex assembly	3	8	1.04	0.37	0.0357	THRA,TP53,ESR1
GO:0045898	Regulation of RNA polymerase II transcription preinitiation complex assembly	4	8	1.08	0.54	0.0070	9606.ENSP00000264637,9606.ENSP00000269305,9606.ENSP00000405330,9606.ENSP00000442318	THRA,TP53,ESR1,CAND1
GO:0045899	Positive regulation of RNA polymerase II transcription preinitiation complex assembly	3	5	1.16	0.44	0.0192	9606.ENSP00000269305,9606.ENSP00000405330,9606.ENSP00000442318	TP53,ESR1,CAND1
GO:0045907	Positive regulation of vasoconstriction	10	32	0.88	0.94	5.21e-05	9606.ENSP00000299178,9606.ENSP00000306662,9606.ENSP00000321326,9606.ENSP00000356094,9606.ENSP00000368766,9606.ENSP00000369647,9606.ENSP00000369960,9606.ENSP00000393333,9606.ENSP00000400175,9606.ENSP00000496396	AVPR1A,ADRA1B,F2R,AVPR1B,ADRA1D,AVP,ADRA1A,TBXA2R,RHOA,AVPR2
GO:0045913	Positive regulation of carbohydrate metabolic process	15	75	0.77	1.05	4.79e-06	NFKB1,INSR,IRS1,PRKCE,RPTOR,PRKAA1,MTOR,PRKAA2,SRC,IRS2,FOXO1,AKT2,PPARA,AKT1,MLST8
GO:0045913	Positive regulation of carbohydrate metabolic process	24	75	0.89	1.88	1.79e-11	9606.ENSP00000226574,9606.ENSP00000264867,9606.ENSP00000284981,9606.ENSP00000301764,9606.ENSP00000303830,9606.ENSP00000304895,9606.ENSP00000306124,9606.ENSP00000307272,9606.ENSP00000311857,9606.ENSP00000326366,9606.ENSP00000346148,9606.ENSP00000354558,9606.ENSP00000356094,9606.ENSP00000360290,9606.ENSP00000362680,9606.ENSP00000365016,9606.ENSP00000368880,9606.ENSP00000375892,9606.ENSP00000385523,…	NFKB1,PPARGC1A,APP,DDB1,INSR,IRS1,PRKCE,RPTOR,PTPN2,PSEN1,PRKAA1,MTOR,AVPR1B,PRKAA2,SRC,IRS2,FOXO1,AKT2,PPARA,PTH1R,HIF1A,AKT1,MLST8,SNCA
GO:0045916	Negative regulation of complement activation	6	14	1.02	0.74	0.00088	9606.ENSP00000243611,9606.ENSP00000278407,9606.ENSP00000296280,9606.ENSP00000313875,9606.ENSP00000356024,9606.ENSP00000363869	C4BPB,SERPING1,MASP1,CD46,CR2,VSIG4
GO:0045923	Positive regulation of fatty acid metabolic process	10	37	0.82	0.84	0.00014	9606.ENSP00000264867,9606.ENSP00000287820,9606.ENSP00000299178,9606.ENSP00000304895,9606.ENSP00000365016,9606.ENSP00000369647,9606.ENSP00000375892,9606.ENSP00000385523,9606.ENSP00000445002,9606.ENSP00000466775	PPARGC1A,PPARG,AVPR1A,IRS1,IRS2,AVP,AKT2,PPARA,APOA5,APOC2
GO:0045924	Regulation of female receptivity	3	7	1.1	0.4	0.0276	PPP1R1B,THRA,THRB
GO:0045924	Regulation of female receptivity	5	7	1.24	0.81	0.00060	9606.ENSP00000254079,9606.ENSP00000264637,9606.ENSP00000299178,9606.ENSP00000369647,9606.ENSP00000379904	PPP1R1B,THRA,AVPR1A,AVP,THRB
GO:0045931	Positive regulation of mitotic cell cycle	26	121	0.8	1.65	9.01e-11	RPS6KB1,DUSP3,CCND1,TTL,CDC25B,DLGAP5,CCNB1,MDM2,ANAPC5,RB1,EGFR,BIRC5,CDC25A,RPTOR,CDC25C,EIF4EBP1,CDC16,UBE2C,CENPJ,CDC23,CDK1,ANAPC7,PRKCA,CDC27,AKT1,PTPN11
GO:0045933	Positive regulation of muscle contraction	12	48	0.78	0.92	4.23e-05	9606.ENSP00000155840,9606.ENSP00000288135,9606.ENSP00000296585,9606.ENSP00000321326,9606.ENSP00000335153,9606.ENSP00000355192,9606.ENSP00000361965,9606.ENSP00000369960,9606.ENSP00000389326,9606.ENSP00000393333,9606.ENSP00000400175,9606.ENSP00000480573	KCNQ1,KIT,ITGA2,F2R,HSP90AA1,CACNA1S,ADA,ADRA1A,ACE2,TBXA2R,RHOA,ADRA2B
GO:0045945	Positive regulation of transcription by RNA polymerase III	4	19	0.79	0.34	0.0446	RPTOR,MTOR,AR,MYO1C
GO:0045945	Positive regulation of transcription by RNA polymerase III	5	19	0.8	0.45	0.0144	9606.ENSP00000307272,9606.ENSP00000348089,9606.ENSP00000354558,9606.ENSP00000363822,9606.ENSP00000496954	RPTOR,ERCC6,MTOR,AR,MYO1C
GO:0045955	Negative regulation of calcium ion-dependent exocytosis	3	8	0.96	0.34	0.0453	9606.ENSP00000250559,9606.ENSP00000280155,9606.ENSP00000312999	RAP1B,ADRA2A,GNAI2
GO:0045963	Negative regulation of dopamine metabolic process	2	2	1.46	0.36	0.0445	ITGB2,ITGAM
GO:0045963	Negative regulation of dopamine metabolic process	2	2	1.38	0.35	0.0489	9606.ENSP00000380948,9606.ENSP00000496959	ITGB2,ITGAM
GO:0045987	Positive regulation of smooth muscle contraction	8	30	0.81	0.69	0.00095	9606.ENSP00000288135,9606.ENSP00000296585,9606.ENSP00000321326,9606.ENSP00000361965,9606.ENSP00000369960,9606.ENSP00000393333,9606.ENSP00000400175,9606.ENSP00000480573	KIT,ITGA2,F2R,ADA,ADRA1A,TBXA2R,RHOA,ADRA2B
GO:0046209	Nitric oxide metabolic process	7	25	0.91	0.72	0.00086	TICAM1,TLR2,NOS3,TLR4,TLR6,AKT1,NOS1
GO:0046209	Nitric oxide metabolic process	8	25	0.89	0.79	0.00036	9606.ENSP00000248244,9606.ENSP00000260010,9606.ENSP00000297494,9606.ENSP00000327251,9606.ENSP00000363089,9606.ENSP00000389600,9606.ENSP00000451828,9606.ENSP00000477999	TICAM1,TLR2,NOS3,NOS2,TLR4,TLR6,AKT1,NOS1
GO:0046320	Regulation of fatty acid oxidation	7	36	0.75	0.54	0.0048	PPARG,PRKAG2,IRS1,IRS2,AKT2,PPARA,AKT1
GO:0046321	Positive regulation of fatty acid oxidation	5	16	0.96	0.56	0.0051	PPARG,IRS1,IRS2,AKT2,PPARA
GO:0046321	Positive regulation of fatty acid oxidation	6	16	0.96	0.68	0.0015	9606.ENSP00000264867,9606.ENSP00000287820,9606.ENSP00000304895,9606.ENSP00000365016,9606.ENSP00000375892,9606.ENSP00000385523	PPARGC1A,PPARG,IRS1,IRS2,AKT2,PPARA
GO:0046324	Regulation of glucose import	11	55	0.77	0.82	0.00015	RPS6KB1,MAPK14,PRKAG2,PRKCI,INSR,IRS1,IRS2,AKT2,PIK3R1,AKT1,PTPN11
GO:0046324	Regulation of glucose import	13	55	0.76	0.93	2.94e-05	9606.ENSP00000222330,9606.ENSP00000225577,9606.ENSP00000229795,9606.ENSP00000287878,9606.ENSP00000295797,9606.ENSP00000303830,9606.ENSP00000304895,9606.ENSP00000365016,9606.ENSP00000375892,9606.ENSP00000398698,9606.ENSP00000428056,9606.ENSP00000451828,9606.ENSP00000489597	GSK3A,RPS6KB1,MAPK14,PRKAG2,PRKCI,INSR,IRS1,IRS2,AKT2,TNF,PIK3R1,AKT1,PTPN11
GO:0046326	Positive regulation of glucose import	9	36	0.86	0.83	0.00020	MAPK14,PRKCI,INSR,IRS1,IRS2,AKT2,PIK3R1,AKT1,PTPN11
GO:0046326	Positive regulation of glucose import	9	36	0.78	0.72	0.00057	9606.ENSP00000229795,9606.ENSP00000295797,9606.ENSP00000303830,9606.ENSP00000304895,9606.ENSP00000365016,9606.ENSP00000375892,9606.ENSP00000428056,9606.ENSP00000451828,9606.ENSP00000489597	MAPK14,PRKCI,INSR,IRS1,IRS2,AKT2,PIK3R1,AKT1,PTPN11
GO:0046328	Regulation of JNK cascade	31	140	0.81	1.89	4.43e-13	GADD45B,RIPK2,DUSP3,TRAF2,GADD45G,RIPK1,TRAF5,MECOM,NCOR1,EGFR,NCF1,DUSP16,CRK,RASGRP1,MAP3K5,TLR9,DUSP10,GADD45A,CARD9,NOX1,TLR4,AGER,TIRAP,TRAF3,PTK2B,MAP2K7,HRAS,MAP2K4,TRAF6,IGF1R,MYD88
GO:0046330	Positive regulation of JNK cascade	24	96	0.86	1.79	4.08e-11	GADD45B,RIPK2,TRAF2,GADD45G,RIPK1,TRAF5,NCF1,CRK,RASGRP1,MAP3K5,TLR9,GADD45A,CARD9,NOX1,TLR4,AGER,TIRAP,TRAF3,PTK2B,MAP2K7,HRAS,MAP2K4,TRAF6,MYD88
GO:0046425	Regulation of receptor signaling pathway via JAK-STAT	21	78	0.81	1.49	5.87e-09	9606.ENSP00000228534,9606.ENSP00000231228,9606.ENSP00000262345,9606.ENSP00000288135,9606.ENSP00000303231,9606.ENSP00000308541,9606.ENSP00000311857,9606.ENSP00000321326,9606.ENSP00000321345,9606.ENSP00000324804,9606.ENSP00000342235,9606.ENSP00000360280,9606.ENSP00000371067,9606.ENSP00000380638,9606.ENSP00000384625,9606.ENSP00000398698,9606.ENSP00000418447,9606.ENSP00000431885,9606.ENSP00000432511,…	IL23A,IL12B,IL12RB2,KIT,IL12A,F2,PTPN2,F2R,IL23R,PPP2R1A,ERBB4,DAB1,JAK2,PTK2B,NLK,TNF,PPP2CA,TYK2,JAK3,IL12RB1,INPP5F
GO:0046427	Positive regulation of receptor signaling pathway via JAK-STAT	14	45	0.88	1.24	9.11e-07	9606.ENSP00000228534,9606.ENSP00000231228,9606.ENSP00000262345,9606.ENSP00000288135,9606.ENSP00000303231,9606.ENSP00000308541,9606.ENSP00000321326,9606.ENSP00000321345,9606.ENSP00000342235,9606.ENSP00000371067,9606.ENSP00000380638,9606.ENSP00000398698,9606.ENSP00000431885,9606.ENSP00000470788	IL23A,IL12B,IL12RB2,KIT,IL12A,F2,F2R,IL23R,ERBB4,JAK2,PTK2B,TNF,TYK2,IL12RB1
GO:0046470	Phosphatidylcholine metabolic process	17	71	0.76	1.16	9.29e-07	9606.ENSP00000219345,9606.ENSP00000261407,9606.ENSP00000264005,9606.ENSP00000274793,9606.ENSP00000292823,9606.ENSP00000302177,9606.ENSP00000317300,9606.ENSP00000320337,9606.ENSP00000324944,9606.ENSP00000330442,9606.ENSP00000368439,9606.ENSP00000384610,9606.ENSP00000396045,9606.ENSP00000407509,9606.ENSP00000445002,9606.ENSP00000472546,9606.ENSP00000486361	PLA2G15,LPCAT3,LCAT,PLA2G7,PCYT1A,MBOAT2,LPCAT4,PLAAT3,MBOAT1,PLB1,PCYT1B,PNPLA7,PLA2G4B,PNPLA6,APOA5,PLA2G4C,DBI
GO:0046475	Glycerophospholipid catabolic process	12	30	0.99	1.31	8.78e-07	9606.ENSP00000219345,9606.ENSP00000274793,9606.ENSP00000290472,9606.ENSP00000330442,9606.ENSP00000368305,9606.ENSP00000380442,9606.ENSP00000382434,9606.ENSP00000384610,9606.ENSP00000396045,9606.ENSP00000407509,9606.ENSP00000472546,9606.ENSP00000497527	PLA2G15,PLA2G7,PLA2G4D,PLB1,GPCPD1,PLA2G4F,PLA2G4E,PNPLA7,PLA2G4B,PNPLA6,PLA2G4C,INPP5F
GO:0046488	Phosphatidylinositol metabolic process	36	153	0.84	2.17	7.35e-16	INPP4A,PIK3R2,PLCG1,PI4KA,ITPKA,PDGFRB,PIK3R3,PIK3CA,PIKFYVE,PI4K2B,PIP5K1B,PIK3C2A,PIP4P2,PLA2G4D,INPPL1,PIP4K2C,PIK3C2B,PI4KB,PIP5K1A,PI4K2A,PTEN,PIP4K2A,PIK3CD,PIP5KL1,PIP4P1,INPP5D,PIK3CG,INPP4B,PIK3R1,PIK3C2G,PIP5K1C,PIK3R6,PLCG2,PIP4K2B,INPP5F,PIK3CB
GO:0046503	Glycerolipid catabolic process	15	53	0.84	1.21	8.81e-07	9606.ENSP00000219345,9606.ENSP00000233242,9606.ENSP00000274793,9606.ENSP00000290472,9606.ENSP00000330442,9606.ENSP00000363638,9606.ENSP00000368305,9606.ENSP00000380442,9606.ENSP00000382434,9606.ENSP00000384610,9606.ENSP00000396045,9606.ENSP00000407509,9606.ENSP00000445002,9606.ENSP00000472546,9606.ENSP00000497527	PLA2G15,APOB,PLA2G7,PLA2G4D,PLB1,LYPLA2,GPCPD1,PLA2G4F,PLA2G4E,PNPLA7,PLA2G4B,PNPLA6,APOA5,PLA2G4C,INPP5F
GO:0046621	Negative regulation of organ growth	8	33	0.77	0.63	0.0016	9606.ENSP00000222330,9606.ENSP00000333685,9606.ENSP00000361021,9606.ENSP00000361892,9606.ENSP00000367545,9606.ENSP00000385523,9606.ENSP00000394033,9606.ENSP00000444198	GSK3A,MAPK11,PTEN,STK4,TP73,PPARA,KCNK2,CITED2
GO:0046626	Regulation of insulin receptor signaling pathway	17	65	0.88	1.45	3.32e-08	RPS6KB1,PRKCQ,IRS1,SIK2,GNAI2,PRKCD,PRKAA1,PIP4K2C,AGT,SRC,OGT,PIP4K2A,PRKCZ,PIK3R1,PIP4K2B,PTPN11,PRKCB
GO:0046626	Regulation of insulin receptor signaling pathway	22	65	0.91	1.85	6.28e-11	9606.ENSP00000219476,9606.ENSP00000222330,9606.ENSP00000225577,9606.ENSP00000257904,9606.ENSP00000263125,9606.ENSP00000304895,9606.ENSP00000305976,9606.ENSP00000311857,9606.ENSP00000312999,9606.ENSP00000331602,9606.ENSP00000346148,9606.ENSP00000347032,9606.ENSP00000355627,9606.ENSP00000362082,9606.ENSP00000362680,9606.ENSP00000362824,9606.ENSP00000365757,9606.ENSP00000367830,9606.ENSP00000428056,…	TSC2,GSK3A,RPS6KB1,CDK4,PRKCQ,IRS1,SIK2,PTPN2,GNAI2,PRKCD,PRKAA1,PIP4K2C,AGT,CCND3,SRC,OGT,PIP4K2A,PRKCZ,PIK3R1,PIP4K2B,PTPN11,PRKCB
GO:0046627	Negative regulation of insulin receptor signaling pathway	10	33	0.95	1.05	1.84e-05	RPS6KB1,PRKCQ,IRS1,PRKCD,PRKAA1,PIP4K2C,PIP4K2A,PRKCZ,PIP4K2B,PRKCB
GO:0046627	Negative regulation of insulin receptor signaling pathway	13	33	0.98	1.39	3.06e-07	9606.ENSP00000219476,9606.ENSP00000222330,9606.ENSP00000225577,9606.ENSP00000263125,9606.ENSP00000304895,9606.ENSP00000311857,9606.ENSP00000331602,9606.ENSP00000346148,9606.ENSP00000347032,9606.ENSP00000365757,9606.ENSP00000367830,9606.ENSP00000482548,9606.ENSP00000496129	TSC2,GSK3A,RPS6KB1,PRKCQ,IRS1,PTPN2,PRKCD,PRKAA1,PIP4K2C,PIP4K2A,PRKCZ,PIP4K2B,PRKCB
GO:0046628	Positive regulation of insulin receptor signaling pathway	6	22	0.9	0.61	0.0028	IRS1,GNAI2,AGT,SRC,PRKCZ,PTPN11
GO:0046628	Positive regulation of insulin receptor signaling pathway	6	22	0.82	0.54	0.0052	9606.ENSP00000304895,9606.ENSP00000312999,9606.ENSP00000355627,9606.ENSP00000362680,9606.ENSP00000367830,9606.ENSP00000489597	IRS1,GNAI2,AGT,SRC,PRKCZ,PTPN11
GO:0046635	Positive regulation of alpha-beta T cell activation	20	71	0.83	1.49	7.92e-09	9606.ENSP00000220751,9606.ENSP00000228534,9606.ENSP00000231228,9606.ENSP00000254066,9606.ENSP00000262345,9606.ENSP00000263125,9606.ENSP00000264972,9606.ENSP00000303231,9606.ENSP00000321345,9606.ENSP00000324890,9606.ENSP00000361965,9606.ENSP00000363318,9606.ENSP00000364898,9606.ENSP00000367830,9606.ENSP00000371067,9606.ENSP00000379873,9606.ENSP00000400175,9606.ENSP00000431885,9606.ENSP00000470788,…	RIPK2,IL23A,IL12B,RARA,IL12RB2,PRKCQ,ZAP70,IL12A,IL23R,CD28,ADA,IL2RG,SYK,PRKCZ,JAK2,HLA-A,RHOA,TYK2,IL12RB1,MALT1
GO:0046638	Positive regulation of alpha-beta T cell differentiation	13	51	0.79	1.0	1.52e-05	9606.ENSP00000220751,9606.ENSP00000228534,9606.ENSP00000231228,9606.ENSP00000254066,9606.ENSP00000264972,9606.ENSP00000321345,9606.ENSP00000361965,9606.ENSP00000363318,9606.ENSP00000364898,9606.ENSP00000367830,9606.ENSP00000400175,9606.ENSP00000470788,9606.ENSP00000497997	RIPK2,IL23A,IL12B,RARA,ZAP70,IL23R,ADA,IL2RG,SYK,PRKCZ,RHOA,IL12RB1,MALT1
GO:0046640	Regulation of alpha-beta T cell proliferation	16	49	0.9	1.43	6.94e-08	9606.ENSP00000220751,9606.ENSP00000226730,9606.ENSP00000228534,9606.ENSP00000231228,9606.ENSP00000262345,9606.ENSP00000263125,9606.ENSP00000264972,9606.ENSP00000303231,9606.ENSP00000321345,9606.ENSP00000324890,9606.ENSP00000364898,9606.ENSP00000371067,9606.ENSP00000379873,9606.ENSP00000431885,9606.ENSP00000470788,9606.ENSP00000499037	RIPK2,IL2,IL23A,IL12B,IL12RB2,PRKCQ,ZAP70,IL12A,IL23R,CD28,SYK,JAK2,HLA-A,TYK2,IL12RB1,CBLB
GO:0046641	Positive regulation of alpha-beta T cell proliferation	6	29	0.78	0.49	0.0085	RIPK2,PRKCQ,ZAP70,CD28,SYK,JAK2
GO:0046641	Positive regulation of alpha-beta T cell proliferation	14	29	1.07	1.68	1.30e-08	9606.ENSP00000220751,9606.ENSP00000228534,9606.ENSP00000231228,9606.ENSP00000262345,9606.ENSP00000263125,9606.ENSP00000264972,9606.ENSP00000303231,9606.ENSP00000321345,9606.ENSP00000324890,9606.ENSP00000364898,9606.ENSP00000371067,9606.ENSP00000379873,9606.ENSP00000431885,9606.ENSP00000470788	RIPK2,IL23A,IL12B,IL12RB2,PRKCQ,ZAP70,IL12A,IL23R,CD28,SYK,JAK2,HLA-A,TYK2,IL12RB1
GO:0046651	Lymphocyte proliferation	30	124	0.77	1.71	1.17e-11	9606.ENSP00000220751,9606.ENSP00000221930,9606.ENSP00000226730,9606.ENSP00000228534,9606.ENSP00000231228,9606.ENSP00000241453,9606.ENSP00000248244,9606.ENSP00000263125,9606.ENSP00000269305,9606.ENSP00000269571,9606.ENSP00000293288,9606.ENSP00000313419,9606.ENSP00000324890,9606.ENSP00000331602,9606.ENSP00000340019,9606.ENSP00000345731,9606.ENSP00000346671,9606.ENSP00000353408,9606.ENSP00000356024,…	RIPK2,TGFB1,IL2,IL23A,IL12B,FLT3,TICAM1,PRKCQ,TP53,ERBB2,BAX,CD19,CD28,PRKCD,HSPD1,DLG1,FYN,MSN,CR2,PTEN,ADA,CCND3,TLR4,PPP3CB,BCL2,PTPN6,PIK3CG,RASSF5,MALT1,CBLB
GO:0046677	Response to antibiotic	10	49	0.77	0.77	0.00030	PPP2CB,CDKN1B,MDM2,SLC9A1,CBL,TP53,HSP90AA1,JAK2,PLA2G4F,JAK1
GO:0046677	Response to antibiotic	12	49	0.77	0.9	5.03e-05	9606.ENSP00000221138,9606.ENSP00000228872,9606.ENSP00000258149,9606.ENSP00000263980,9606.ENSP00000264033,9606.ENSP00000269305,9606.ENSP00000324173,9606.ENSP00000330237,9606.ENSP00000335153,9606.ENSP00000371067,9606.ENSP00000380442,9606.ENSP00000499900	PPP2CB,CDKN1B,MDM2,SLC9A1,CBL,TP53,HSPA5,CASP9,HSP90AA1,JAK2,PLA2G4F,JAK1
GO:0046686	Response to cadmium ion	15	59	0.87	1.29	3.66e-07	MAPK1,CDKN1B,MAPK3,DAXX,EGFR,KIT,NCF1,FOS,CHUK,JUN,CYBB,CDK1,MAPK8,MAPK9,AKT1
GO:0046777	Protein autophosphorylation	58	189	0.95	3.46	1.13e-30	AURKA,FLT3,MKNK2,PDGFRA,RIPK1,PDGFRB,MAP2K2,MAPK3,EEF2K,PRKCG,KDR,TXK,PIKFYVE,PRKG2,ZAP70,ERBB2,EGFR,KIT,FGFR4,LRRK2,INSR,SIK2,PRKACA,ULK1,ATG101,FGFR3,PTK2,ERBB4,PDPK1,FYN,MTOR,MAPKAPK2,SLK,IRAK1,SRC,SYK,MYLK2,JAK2,ALK,GRK5,ULK2,CAMK2B,PTK2B,NLK,DAPK1,FGFR1,MAPKAPK3,FGFR2,CAMK2D,LYN,NTRK1,MAPKAPK5,AKT1,BTK,DAPK2,IGF1R,MKNK1,CAMK2A
GO:0046777	Protein autophosphorylation	60	189	0.89	3.11	2.49e-28	9606.ENSP00000199389,9606.ENSP00000241453,9606.ENSP00000250896,9606.ENSP00000257290,9606.ENSP00000259808,9606.ENSP00000261799,9606.ENSP00000262948,9606.ENSP00000263025,9606.ENSP00000263026,9606.ENSP00000263431,9606.ENSP00000263923,9606.ENSP00000264316,9606.ENSP00000264399,9606.ENSP00000264972,9606.ENSP00000269571,9606.ENSP00000275493,9606.ENSP00000282356,9606.ENSP00000282397,9606.ENSP00000288135,…	EIF2AK1,FLT3,MKNK2,PDGFRA,RIPK1,PDGFRB,MAP2K2,MAPK3,EEF2K,PRKCG,KDR,TXK,PRKG2,ZAP70,ERBB2,EGFR,CAMK4,FLT1,KIT,INSR,SIK2,PRKACA,MOS,ULK1,GSK3B,ATG101,PTK2,ERBB4,PDPK1,FYN,MTOR,MAPKAPK2,IRAK1,STK4,SRC,FGR,SYK,HCK,MYLK2,JAK2,ALK,GRK5,ULK2,CAMK2B,PTK2B,NLK,DAPK1,PRKD1,FGFR1,PRKD2,MAPKAPK3,CAMK2D,LYN,NTRK1,MAPKAPK5,AKT1,BTK,DAPK2,IGF1R,CAMK2A
GO:0046813	Receptor-mediated virion attachment to host cell	3	7	1.02	0.37	0.0352	9606.ENSP00000316228,9606.ENSP00000353731,9606.ENSP00000389326	CLEC4M,DPP4,ACE2
GO:0046824	Positive regulation of nucleocytoplasmic transport	13	64	0.77	0.96	2.28e-05	PIK3R2,MAPK14,CAMK1,PRKACA,PRKCD,SMAD3,HSP90AA1,SFN,JAK2,CDK1,RAPGEF3,MAVS,PIK3R1
GO:0046824	Positive regulation of nucleocytoplasmic transport	17	64	0.81	1.26	2.80e-07	9606.ENSP00000221930,9606.ENSP00000222254,9606.ENSP00000229795,9606.ENSP00000256460,9606.ENSP00000309591,9606.ENSP00000324806,9606.ENSP00000326366,9606.ENSP00000331602,9606.ENSP00000332973,9606.ENSP00000335153,9606.ENSP00000340989,9606.ENSP00000360609,9606.ENSP00000371067,9606.ENSP00000390535,9606.ENSP00000395708,9606.ENSP00000401980,9606.ENSP00000428056	TGFB1,PIK3R2,MAPK14,CAMK1,PRKACA,GSK3B,PSEN1,PRKCD,SMAD3,HSP90AA1,SFN,HSP90AB1,JAK2,PRKD1,RAPGEF3,MAVS,PIK3R1
GO:0046827	Positive regulation of protein export from nucleus	4	18	0.81	0.35	0.0390	CAMK1,PRKACA,SFN,RAPGEF3
GO:0046827	Positive regulation of protein export from nucleus	5	18	0.83	0.46	0.0122	9606.ENSP00000256460,9606.ENSP00000309591,9606.ENSP00000324806,9606.ENSP00000340989,9606.ENSP00000395708	CAMK1,PRKACA,GSK3B,SFN,RAPGEF3
GO:0046854	Phosphatidylinositol phosphate biosynthetic process	26	66	1.06	2.67	8.75e-16	INPP4A,PIK3R2,PI4KA,ITPKA,PIK3R3,PIK3CA,PIKFYVE,PI4K2B,PIP5K1B,PIK3C2A,PIP4K2C,PIK3C2B,PI4KB,PIP5K1A,PI4K2A,PIP4K2A,PIK3CD,PIP5KL1,PIK3CG,INPP4B,PIK3R1,PIK3C2G,PIP5K1C,PIK3R6,PIP4K2B,PIK3CB
GO:0046854	Phosphatidylinositol phosphate biosynthetic process	23	66	0.93	1.95	1.28e-11	9606.ENSP00000074304,9606.ENSP00000222254,9606.ENSP00000255882,9606.ENSP00000260386,9606.ENSP00000262741,9606.ENSP00000263967,9606.ENSP00000264864,9606.ENSP00000265382,9606.ENSP00000347032,9606.ENSP00000356155,9606.ENSP00000357883,9606.ENSP00000359665,9606.ENSP00000365757,9606.ENSP00000366563,9606.ENSP00000373399,9606.ENSP00000419260,9606.ENSP00000422793,9606.ENSP00000428056,9606.ENSP00000445381,…	INPP4A,PIK3R2,PI4KA,ITPKA,PIK3R3,PIK3CA,PI4K2B,PIP5K1B,PIP4K2C,PIK3C2B,PIP5K1A,PI4K2A,PIP4K2A,PIK3CD,PIP5KL1,PIK3CG,INPP4B,PIK3R1,PIK3C2G,PIP5K1C,PIK3R6,PIP4K2B,PIK3CB
GO:0046856	Phosphatidylinositol dephosphorylation	7	30	0.83	0.63	0.0021	PIP4P2,INPPL1,PTEN,PIP4P1,INPP5D,INPP4B,INPP5F
GO:0046856	Phosphatidylinositol dephosphorylation	7	30	0.75	0.55	0.0043	9606.ENSP00000285419,9606.ENSP00000298229,9606.ENSP00000361021,9606.ENSP00000381102,9606.ENSP00000405338,9606.ENSP00000422793,9606.ENSP00000497527	PIP4P2,INPPL1,PTEN,PIP4P1,INPP5D,INPP4B,INPP5F
GO:0046902	Regulation of mitochondrial membrane permeability	17	63	0.81	1.28	2.31e-07	9606.ENSP00000222330,9606.ENSP00000263980,9606.ENSP00000264110,9606.ENSP00000265164,9606.ENSP00000269305,9606.ENSP00000293288,9606.ENSP00000318822,9606.ENSP00000324806,9606.ENSP00000329213,9606.ENSP00000357804,9606.ENSP00000363591,9606.ENSP00000365230,9606.ENSP00000376943,9606.ENSP00000378040,9606.ENSP00000378974,9606.ENSP00000381185,9606.ENSP00000500386	GSK3A,SLC9A1,ATF2,CASP6,TP53,BAX,BID,GSK3B,SIVA1,THEM4,BAK1,BCL2L1,BCL2L11,BAD,MAPK8,BCL2,CAMK2A
GO:0046929	Negative regulation of neurotransmitter secretion	4	11	0.94	0.45	0.0154	9606.ENSP00000250559,9606.ENSP00000355865,9606.ENSP00000358723,9606.ENSP00000419060	RAP1B,PRKN,RAP1A,BRAF
GO:0048008	Platelet-derived growth factor receptor signaling pathway	7	34	0.78	0.57	0.0037	PDGFRA,PDGFRB,PIK3C2A,IQGAP1,JAK2,ITGB3,PTPN11
GO:0048009	Insulin-like growth factor receptor signaling pathway	5	17	0.93	0.54	0.0063	IRS1,AR,PIK3R1,AKT1,IGF1R
GO:0048009	Insulin-like growth factor receptor signaling pathway	6	17	0.93	0.65	0.0019	9606.ENSP00000219476,9606.ENSP00000304895,9606.ENSP00000363822,9606.ENSP00000428056,9606.ENSP00000451828,9606.ENSP00000497069	TSC2,IRS1,AR,PIK3R1,AKT1,IGF1R
GO:0048010	Vascular endothelial growth factor receptor signaling pathway	10	33	0.95	1.05	1.84e-05	MAPK14,KDR,PTK2,FYN,MAPKAPK2,VAV2,SRC,PTK2B,MAPKAPK3,VAV1
GO:0048010	Vascular endothelial growth factor receptor signaling pathway	15	33	1.04	1.71	6.33e-09	9606.ENSP00000229795,9606.ENSP00000263923,9606.ENSP00000282397,9606.ENSP00000311127,9606.ENSP00000341189,9606.ENSP00000346671,9606.ENSP00000356070,9606.ENSP00000360916,9606.ENSP00000362680,9606.ENSP00000380638,9606.ENSP00000390535,9606.ENSP00000393978,9606.ENSP00000396467,9606.ENSP00000451040,9606.ENSP00000472929	MAPK14,KDR,FLT1,VEGFB,PTK2,FYN,MAPKAPK2,VAV2,SRC,PTK2B,PRKD1,PRKD2,MAPKAPK3,PGF,VAV1
GO:0048011	Neurotrophin TRK receptor signaling pathway	6	13	1.13	0.85	0.00033	SRC,AKT1S1,SOS1,RAF1,NTRK1,PTPN11
GO:0048011	Neurotrophin TRK receptor signaling pathway	5	13	0.97	0.58	0.0043	9606.ENSP00000362680,9606.ENSP00000375711,9606.ENSP00000401888,9606.ENSP00000431418,9606.ENSP00000489597	SRC,AKT1S1,RAF1,NTRK1,PTPN11
GO:0048015	Phosphatidylinositol-mediated signaling	30	79	1.04	2.86	7.64e-18	PIK3R2,RPS6KB1,PI4KA,PDGFRA,PDGFRB,PIK3CA,PIK3C2A,ERBB3,ERBB2,IRS1,CD28,EZR,GAB2,PIK3C2B,PI4KB,PLCE1,PTEN,OGT,PIK3CD,PRR5L,PRR5,PIK3R5,FGFR1,PIK3CG,PIK3R1,PIK3C2G,AKT1,IGF1R,INPP5F,PIK3CB
GO:0048015	Phosphatidylinositol-mediated signaling	27	79	0.92	2.14	2.07e-13	9606.ENSP00000222254,9606.ENSP00000225577,9606.ENSP00000255882,9606.ENSP00000257290,9606.ENSP00000261799,9606.ENSP00000263967,9606.ENSP00000267101,9606.ENSP00000269571,9606.ENSP00000304895,9606.ENSP00000324890,9606.ENSP00000338934,9606.ENSP00000354952,9606.ENSP00000356155,9606.ENSP00000361021,9606.ENSP00000362824,9606.ENSP00000366563,9606.ENSP00000368144,9606.ENSP00000384848,9606.ENSP00000392812,…	PIK3R2,RPS6KB1,PI4KA,PDGFRA,PDGFRB,PIK3CA,ERBB3,ERBB2,IRS1,CD28,EZR,GAB2,PIK3C2B,PTEN,OGT,PIK3CD,PRR5L,PRR5,PIK3R5,FGFR1,PIK3CG,PIK3R1,PIK3C2G,AKT1,IGF1R,INPP5F,PIK3CB
GO:0048016	Inositol phosphate-mediated signaling	8	27	0.94	0.85	0.00021	NFATC3,MTOR,PLCE1,ITPR3,ITPR2,PPP3CA,NFATC2,NFATC1
GO:0048016	Inositol phosphate-mediated signaling	10	27	0.95	1.07	1.64e-05	9606.ENSP00000300659,9606.ENSP00000306253,9606.ENSP00000354558,9606.ENSP00000363435,9606.ENSP00000370744,9606.ENSP00000378306,9606.ENSP00000378323,9606.ENSP00000379330,9606.ENSP00000380878,9606.ENSP00000389377	NFATC3,ITPR1,MTOR,ITPR3,ITPR2,PPP3CB,PPP3CA,NFATC2,PPP3CC,NFATC1
GO:0048143	Astrocyte activation	6	17	0.93	0.65	0.0019	9606.ENSP00000243077,9606.ENSP00000284981,9606.ENSP00000326366,9606.ENSP00000356713,9606.ENSP00000363773,9606.ENSP00000398698	LRP1,APP,PSEN1,IFNGR1,C1QA,TNF
GO:0048144	Fibroblast proliferation	9	34	0.89	0.87	0.00014	NGFR,TP53,CKS1B,AGT,CKS2,CDK1,ESR1,HRAS,PTGES3
GO:0048145	Regulation of fibroblast proliferation	17	89	0.75	1.11	1.47e-06	NGFR,CCNB1,PDGFRA,PDGFRB,FOSL2,TP53,EGFR,PPARG,BAX,FN1,AGT,S100A6,JUN,ESR1,HRAS,ITGB3,CCNA2
GO:0048146	Positive regulation of fibroblast proliferation	14	54	0.88	1.24	8.46e-07	NGFR,CCNB1,PDGFRA,PDGFRB,FOSL2,EGFR,FN1,AGT,S100A6,JUN,ESR1,HRAS,ITGB3,CCNA2
GO:0048146	Positive regulation of fibroblast proliferation	15	54	0.83	1.2	1.06e-06	9606.ENSP00000172229,9606.ENSP00000221930,9606.ENSP00000257290,9606.ENSP00000257904,9606.ENSP00000261799,9606.ENSP00000264716,9606.ENSP00000275493,9606.ENSP00000293549,9606.ENSP00000346839,9606.ENSP00000355627,9606.ENSP00000360266,9606.ENSP00000384849,9606.ENSP00000405330,9606.ENSP00000407586,9606.ENSP00000452786	NGFR,TGFB1,PDGFRA,CDK4,PDGFRB,FOSL2,EGFR,WNT1,FN1,AGT,JUN,CDKN1A,ESR1,HRAS,ITGB3
GO:0048169	Regulation of long-term neuronal synaptic plasticity	5	23	0.8	0.43	0.0167	KRAS,KIT,AGT,CAMK2B,HRAS
GO:0048169	Regulation of long-term neuronal synaptic plasticity	7	23	0.87	0.67	0.0013	9606.ENSP00000256078,9606.ENSP00000284981,9606.ENSP00000288135,9606.ENSP00000355627,9606.ENSP00000379098,9606.ENSP00000407586,9606.ENSP00000500990	KRAS,APP,KIT,AGT,CAMK2B,HRAS,SNCA
GO:0048265	Response to pain	6	29	0.78	0.49	0.0085	PRKCG,CAPN2,MTOR,NTRK1,AKT1,TRPV1
GO:0048265	Response to pain	9	29	0.88	0.86	0.00015	9606.ENSP00000260356,9606.ENSP00000263431,9606.ENSP00000339730,9606.ENSP00000354558,9606.ENSP00000366416,9606.ENSP00000393098,9606.ENSP00000431418,9606.ENSP00000451828,9606.ENSP00000459962	THBS1,PRKCG,THBS4,MTOR,EDNRB,LPAR5,NTRK1,AKT1,TRPV1
GO:0048266	Behavioral response to pain	5	16	0.96	0.56	0.0051	CAPN2,MTOR,NTRK1,AKT1,TRPV1
GO:0048266	Behavioral response to pain	7	16	1.02	0.86	0.00023	9606.ENSP00000260356,9606.ENSP00000339730,9606.ENSP00000354558,9606.ENSP00000393098,9606.ENSP00000431418,9606.ENSP00000451828,9606.ENSP00000459962	THBS1,THBS4,MTOR,LPAR5,NTRK1,AKT1,TRPV1
GO:0048333	Mesodermal cell differentiation	6	28	0.8	0.51	0.0074	ITGB4,ITGA2,ITGA3,ITGB1,FGFR2,ITGB3
GO:0048384	Retinoic acid receptor signaling pathway	5	18	0.91	0.52	0.0075	ACTN4,RARA,PPARG,CRKL,RXRA
GO:0048384	Retinoic acid receptor signaling pathway	5	18	0.83	0.46	0.0122	9606.ENSP00000252699,9606.ENSP00000254066,9606.ENSP00000287820,9606.ENSP00000346300,9606.ENSP00000419692	ACTN4,RARA,PPARG,CRKL,RXRA
GO:0048512	Circadian behavior	5	24	0.78	0.42	0.0193	NCOR1,TP53,PTEN,CSNK1E,NCOA2
GO:0048512	Circadian behavior	6	24	0.78	0.51	0.0073	9606.ENSP00000268712,9606.ENSP00000269305,9606.ENSP00000361021,9606.ENSP00000370571,9606.ENSP00000380044,9606.ENSP00000399968	NCOR1,TP53,PTEN,TH,CSNK1E,NCOA2
GO:0048538	Thymus development	12	49	0.77	0.9	5.03e-05	9606.ENSP00000215832,9606.ENSP00000262948,9606.ENSP00000263025,9606.ENSP00000302486,9606.ENSP00000326366,9606.ENSP00000346300,9606.ENSP00000376943,9606.ENSP00000381185,9606.ENSP00000401888,9606.ENSP00000419060,9606.ENSP00000444198,9606.ENSP00000495360	MAPK1,MAP2K2,MAPK3,MAP2K1,PSEN1,CRKL,BCL2L11,BCL2,RAF1,BRAF,CITED2,CTNNB1
GO:0048563	Post-embryonic animal organ morphogenesis	4	12	0.91	0.43	0.0192	9606.ENSP00000263923,9606.ENSP00000293288,9606.ENSP00000363591,9606.ENSP00000376943	KDR,BAX,BAK1,BCL2L11
GO:0048569	Post-embryonic animal organ development	5	19	0.8	0.45	0.0144	9606.ENSP00000263923,9606.ENSP00000293288,9606.ENSP00000363591,9606.ENSP00000371067,9606.ENSP00000376943	KDR,BAX,BAK1,JAK2,BCL2L11
GO:0048597	Post-embryonic camera-type eye morphogenesis	3	4	1.26	0.49	0.0129	9606.ENSP00000263923,9606.ENSP00000293288,9606.ENSP00000363591	KDR,BAX,BAK1
GO:0048660	Regulation of smooth muscle cell proliferation	30	142	0.79	1.78	3.16e-12	RPS6KB1,CDKN1B,CYBA,PDGFRB,PIK3CA,GJA1,PPARG,ITGA2,NOS3,GNAI2,MAP3K5,AGT,GNAI3,IRAK1,JUN,PTEN,NOX1,HDAC1,SRC,TLR4,PRKG1,JAK2,ACE2,RHOA,FGFR2,AKT1,ITGB3,IRAK4,IGF1R,MYD88
GO:0048660	Regulation of smooth muscle cell proliferation	42	142	0.85	2.46	7.76e-19	9606.ENSP00000221930,9606.ENSP00000225577,9606.ENSP00000228872,9606.ENSP00000231228,9606.ENSP00000252486,9606.ENSP00000260356,9606.ENSP00000261623,9606.ENSP00000261799,9606.ENSP00000263967,9606.ENSP00000264867,9606.ENSP00000275364,9606.ENSP00000287820,9606.ENSP00000296585,9606.ENSP00000297494,9606.ENSP00000303231,9606.ENSP00000312999,9606.ENSP00000351908,9606.ENSP00000354394,9606.ENSP00000355627,…	TGFB1,RPS6KB1,CDKN1B,IL12B,APOE,THBS1,CYBA,PDGFRB,PIK3CA,PPARGC1A,GNA12,PPARG,ITGA2,NOS3,IL12A,GNAI2,MAP3K5,STAT1,AGT,IL6R,GNAI3,IRAK1,JUN,PTEN,MMP9,HDAC1,SRC,TLR4,PRKG1,JAK2,CDKN1A,ACE2,TNF,RHOA,GNA13,AKT1,ITGB3,IRAK4,CTNNB1,S1PR2,IGF1R,MYD88
GO:0048661	Positive regulation of smooth muscle cell proliferation	23	85	0.9	1.85	3.05e-11	RPS6KB1,CYBA,PDGFRB,PIK3CA,GJA1,ITGA2,GNAI2,MAP3K5,AGT,GNAI3,IRAK1,JUN,NOX1,HDAC1,SRC,TLR4,JAK2,FGFR2,AKT1,ITGB3,IRAK4,IGF1R,MYD88
GO:0048661	Positive regulation of smooth muscle cell proliferation	26	85	0.87	1.91	4.92e-12	9606.ENSP00000221930,9606.ENSP00000225577,9606.ENSP00000260356,9606.ENSP00000261623,9606.ENSP00000261799,9606.ENSP00000263967,9606.ENSP00000296585,9606.ENSP00000312999,9606.ENSP00000351908,9606.ENSP00000354394,9606.ENSP00000355627,9606.ENSP00000357470,9606.ENSP00000358867,9606.ENSP00000358997,9606.ENSP00000360266,9606.ENSP00000361405,9606.ENSP00000362649,9606.ENSP00000362680,9606.ENSP00000363089,…	TGFB1,RPS6KB1,THBS1,CYBA,PDGFRB,PIK3CA,ITGA2,GNAI2,MAP3K5,STAT1,AGT,IL6R,GNAI3,IRAK1,JUN,MMP9,HDAC1,SRC,TLR4,JAK2,TNF,AKT1,ITGB3,IRAK4,IGF1R,MYD88
GO:0048662	Negative regulation of smooth muscle cell proliferation	15	53	0.84	1.21	8.81e-07	9606.ENSP00000228872,9606.ENSP00000231228,9606.ENSP00000252486,9606.ENSP00000264867,9606.ENSP00000275364,9606.ENSP00000287820,9606.ENSP00000297494,9606.ENSP00000303231,9606.ENSP00000361021,9606.ENSP00000363092,9606.ENSP00000384849,9606.ENSP00000389326,9606.ENSP00000400175,9606.ENSP00000400717,9606.ENSP00000496438	CDKN1B,IL12B,APOE,PPARGC1A,GNA12,PPARG,NOS3,IL12A,PTEN,PRKG1,CDKN1A,ACE2,RHOA,GNA13,S1PR2
GO:0048670	Regulation of collateral sprouting	5	21	0.76	0.41	0.0198	9606.ENSP00000324560,9606.ENSP00000359643,9606.ENSP00000378517,9606.ENSP00000378914,9606.ENSP00000389140	ULK1,LPAR3,SPP1,ULK2,DCC
GO:0048671	Negative regulation of collateral sprouting	4	11	0.94	0.45	0.0154	9606.ENSP00000324560,9606.ENSP00000378517,9606.ENSP00000378914,9606.ENSP00000389140	ULK1,SPP1,ULK2,DCC
GO:0048678	Response to axon injury	13	56	0.75	0.92	3.44e-05	9606.ENSP00000265131,9606.ENSP00000293288,9606.ENSP00000351490,9606.ENSP00000356646,9606.ENSP00000360266,9606.ENSP00000371067,9606.ENSP00000381185,9606.ENSP00000394033,9606.ENSP00000428924,9606.ENSP00000431418,9606.ENSP00000481780,9606.ENSP00000482169,9606.ENSP00000482457	TNC,BAX,MAX,TNR,JUN,JAK2,BCL2,KCNK2,LYN,NTRK1,MAPK8IP3,NEFL,PLCG2
GO:0048679	Regulation of axon regeneration	6	28	0.8	0.51	0.0074	MAP2K2,MAP2K1,PTEN,BRAF,IGF1R,INPP5F
GO:0048679	Regulation of axon regeneration	8	28	0.84	0.73	0.00065	9606.ENSP00000262948,9606.ENSP00000302486,9606.ENSP00000356646,9606.ENSP00000361021,9606.ENSP00000378517,9606.ENSP00000419060,9606.ENSP00000497069,9606.ENSP00000497527	MAP2K2,MAP2K1,TNR,PTEN,SPP1,BRAF,IGF1R,INPP5F
GO:0048681	Negative regulation of axon regeneration	4	14	0.84	0.38	0.0287	9606.ENSP00000356646,9606.ENSP00000361021,9606.ENSP00000378517,9606.ENSP00000497527	TNR,PTEN,SPP1,INPP5F
GO:0048708	Astrocyte differentiation	15	61	0.77	1.08	3.81e-06	9606.ENSP00000215832,9606.ENSP00000243077,9606.ENSP00000256078,9606.ENSP00000263025,9606.ENSP00000264657,9606.ENSP00000284981,9606.ENSP00000302486,9606.ENSP00000326366,9606.ENSP00000356713,9606.ENSP00000360280,9606.ENSP00000363089,9606.ENSP00000363773,9606.ENSP00000384109,9606.ENSP00000398698,9606.ENSP00000489597	MAPK1,LRP1,KRAS,MAPK3,STAT3,APP,MAP2K1,PSEN1,IFNGR1,DAB1,TLR4,C1QA,CUL4B,TNF,PTPN11
GO:0048714	Positive regulation of oligodendrocyte differentiation	5	26	0.75	0.39	0.0250	TLR2,RHEB,PPARG,MTOR,HDAC1
GO:0048714	Positive regulation of oligodendrocyte differentiation	7	26	0.81	0.61	0.0023	9606.ENSP00000260010,9606.ENSP00000262187,9606.ENSP00000287820,9606.ENSP00000354558,9606.ENSP00000362649,9606.ENSP00000367545,9606.ENSP00000386884	TLR2,RHEB,PPARG,MTOR,HDAC1,TP73,CXCR4
GO:0048873	Homeostasis of number of cells within a tissue	6	30	0.77	0.48	0.0097	KRAS,BAX,NOS3,RAC3,PTPN11,AKT3
GO:0048873	Homeostasis of number of cells within a tissue	8	30	0.81	0.69	0.00095	9606.ENSP00000256078,9606.ENSP00000293288,9606.ENSP00000297494,9606.ENSP00000304283,9606.ENSP00000321326,9606.ENSP00000381185,9606.ENSP00000489597,9606.ENSP00000500582	KRAS,BAX,NOS3,RAC3,F2R,BCL2,PTPN11,AKT3
GO:0050671	Positive regulation of lymphocyte proliferation	34	147	0.75	1.76	1.07e-12	9606.ENSP00000220751,9606.ENSP00000226730,9606.ENSP00000228534,9606.ENSP00000231228,9606.ENSP00000248244,9606.ENSP00000262345,9606.ENSP00000263125,9606.ENSP00000264972,9606.ENSP00000294728,9606.ENSP00000303231,9606.ENSP00000313875,9606.ENSP00000315477,9606.ENSP00000321345,9606.ENSP00000324890,9606.ENSP00000353874,9606.ENSP00000359073,9606.ENSP00000361965,9606.ENSP00000363089,9606.ENSP00000364898,…	RIPK2,IL2,IL23A,IL12B,TICAM1,IL12RB2,PRKCQ,ZAP70,VCAM1,IL12A,CD46,CD209,IL23R,CD28,TLR9,VAV3,ADA,TLR4,SYK,IRS2,IL6ST,JAK2,TIRAP,PPP3CA,NFATC2,HLA-A,BCL2,CDKN1A,TYK2,JAK3,TRAF6,IL12RB1,BTK,MYD88
GO:0050746	Regulation of lipoprotein metabolic process	4	18	0.81	0.35	0.0390	ITGAV,ULK1,ATG101,ITGB3
GO:0050746	Regulation of lipoprotein metabolic process	5	18	0.83	0.46	0.0122	9606.ENSP00000261023,9606.ENSP00000324560,9606.ENSP00000338990,9606.ENSP00000452786,9606.ENSP00000486361	ITGAV,ULK1,ATG101,ITGB3,DBI
GO:0050748	Negative regulation of lipoprotein metabolic process	3	5	1.16	0.44	0.0192	9606.ENSP00000261023,9606.ENSP00000452786,9606.ENSP00000486361	ITGAV,ITGB3,DBI
GO:0050764	Regulation of phagocytosis	28	104	0.81	1.8	7.96e-12	9606.ENSP00000221930,9606.ENSP00000245907,9606.ENSP00000247153,9606.ENSP00000260010,9606.ENSP00000261023,9606.ENSP00000261623,9606.ENSP00000263431,9606.ENSP00000285419,9606.ENSP00000287820,9606.ENSP00000289902,9606.ENSP00000291744,9606.ENSP00000296280,9606.ENSP00000296585,9606.ENSP00000299367,9606.ENSP00000320866,9606.ENSP00000355361,9606.ENSP00000363079,9606.ENSP00000363117,9606.ENSP00000363318,…	TGFB1,C3,CFP,TLR2,ITGAV,CYBA,PRKCG,PIP4P2,PPARG,FCER1G,FCN2,MASP1,ITGA2,C2,CALR,CD47,MBL2,FGR,IL2RG,SYK,HCK,MASP2,C4A,TNF,C4B,CFB,PLCG2,BTK
GO:0050766	Positive regulation of phagocytosis	20	75	0.81	1.43	1.69e-08	9606.ENSP00000245907,9606.ENSP00000247153,9606.ENSP00000261623,9606.ENSP00000287820,9606.ENSP00000289902,9606.ENSP00000291744,9606.ENSP00000296280,9606.ENSP00000296585,9606.ENSP00000299367,9606.ENSP00000320866,9606.ENSP00000355361,9606.ENSP00000363079,9606.ENSP00000363318,9606.ENSP00000383690,9606.ENSP00000396688,9606.ENSP00000398698,9606.ENSP00000415941,9606.ENSP00000416561,9606.ENSP00000482457,…	C3,CFP,CYBA,PPARG,FCER1G,FCN2,MASP1,ITGA2,C2,CALR,CD47,MBL2,IL2RG,MASP2,C4A,TNF,C4B,CFB,PLCG2,BTK
GO:0050774	Negative regulation of dendrite morphogenesis	3	9	0.99	0.35	0.0445	YWHAH,RAPGEF2,PPP3CA
GO:0050818	Regulation of coagulation	19	75	0.79	1.32	8.42e-08	9606.ENSP00000223095,9606.ENSP00000226218,9606.ENSP00000233156,9606.ENSP00000234071,9606.ENSP00000252486,9606.ENSP00000257290,9606.ENSP00000260356,9606.ENSP00000278407,9606.ENSP00000297494,9606.ENSP00000308541,9606.ENSP00000321326,9606.ENSP00000326366,9606.ENSP00000331602,9606.ENSP00000356671,9606.ENSP00000363092,9606.ENSP00000364731,9606.ENSP00000384262,9606.ENSP00000384957,9606.ENSP00000393333	SERPINE1,VTN,TFPI,PROC,APOE,PDGFRA,THBS1,SERPING1,NOS3,F2,F2R,PSEN1,PRKCD,SERPINC1,PRKG1,F7,HPSE,F11,TBXA2R
GO:0050820	Positive regulation of coagulation	9	30	0.86	0.84	0.00019	9606.ENSP00000223095,9606.ENSP00000226218,9606.ENSP00000260356,9606.ENSP00000308541,9606.ENSP00000321326,9606.ENSP00000326366,9606.ENSP00000364731,9606.ENSP00000384262,9606.ENSP00000393333	SERPINE1,VTN,THBS1,F2,F2R,PSEN1,F7,HPSE,TBXA2R
GO:0050848	Regulation of calcium-mediated signaling	17	83	0.78	1.18	6.39e-07	SLC8A2,SLC9A1,ZAP70,ERBB3,CALM3,LRRK2,MAPT,ATP2B4,MTOR,ADA,SYK,AKAP5,PPP3CA,PTK2B,PLCG2,CALM1,CALM2
GO:0050848	Regulation of calcium-mediated signaling	21	83	0.79	1.41	1.46e-08	9606.ENSP00000236877,9606.ENSP00000263980,9606.ENSP00000264972,9606.ENSP00000267101,9606.ENSP00000291295,9606.ENSP00000306253,9606.ENSP00000324806,9606.ENSP00000350310,9606.ENSP00000354558,9606.ENSP00000361965,9606.ENSP00000364898,9606.ENSP00000378207,9606.ENSP00000378306,9606.ENSP00000378323,9606.ENSP00000380638,9606.ENSP00000380878,9606.ENSP00000398698,9606.ENSP00000482457,9606.ENSP00000498330,…	SLC8A2,SLC9A1,ZAP70,ERBB3,CALM3,ITPR1,GSK3B,ATP2B4,MTOR,ADA,SYK,AKAP5,PPP3CB,PPP3CA,PTK2B,PPP3CC,TNF,PLCG2,PPP3R2,CALM1,CALM2
GO:0050850	Positive regulation of calcium-mediated signaling	12	42	0.84	1.02	1.44e-05	9606.ENSP00000263980,9606.ENSP00000264972,9606.ENSP00000267101,9606.ENSP00000361965,9606.ENSP00000364898,9606.ENSP00000378207,9606.ENSP00000378306,9606.ENSP00000378323,9606.ENSP00000380878,9606.ENSP00000398698,9606.ENSP00000482457,9606.ENSP00000498330	SLC9A1,ZAP70,ERBB3,ADA,SYK,AKAP5,PPP3CB,PPP3CA,PPP3CC,TNF,PLCG2,PPP3R2
GO:0050851	Antigen receptor-mediated signaling pathway	36	141	0.87	2.33	8.46e-17	MAPK1,RIPK2,BLNK,PLCG1,PIK3CA,TXK,ZAP70,BAX,CD19,CD28,CRKL,FYN,MAP3K7,VAV3,ADA,SYK,PIK3CD,NFATC2,PTPN6,ITK,INPP5D,HRAS,BRAF,LYN,IKBKB,TRAF6,IGHV3-16,IGHV3-72,IGHV3-43D,PLCG2,BTK,IKBKG,PRKCB,MALT1,BCL10,CBLB
GO:0050851	Antigen receptor-mediated signaling pathway	40	141	0.84	2.32	1.96e-17	9606.ENSP00000215832,9606.ENSP00000220751,9606.ENSP00000244007,9606.ENSP00000263967,9606.ENSP00000264316,9606.ENSP00000264972,9606.ENSP00000293288,9606.ENSP00000313419,9606.ENSP00000324890,9606.ENSP00000326366,9606.ENSP00000346300,9606.ENSP00000346671,9606.ENSP00000358335,9606.ENSP00000359073,9606.ENSP00000361965,9606.ENSP00000364898,9606.ENSP00000366563,9606.ENSP00000379330,9606.ENSP00000379873,…	MAPK1,RIPK2,PLCG1,PIK3CA,TXK,ZAP70,BAX,CD19,CD28,PSEN1,CRKL,FYN,MAP3K7,VAV3,ADA,SYK,PIK3CD,NFATC2,HLA-A,BCL2,PTPN6,PRKD2,ITK,INPP5D,HRAS,BRAF,LYN,IKBKB,IGLL5,TRAF6,LOC102723407,IGHV3-72,IGHV3-43D,PLCG2,BTK,IKBKG,PRKCB,MALT1,BCL10,CBLB
GO:0050852	T cell receptor signaling pathway	24	103	0.83	1.69	1.40e-10	MAPK1,RIPK2,PLCG1,PIK3CA,TXK,ZAP70,CD28,CRKL,FYN,MAP3K7,ADA,PIK3CD,PTPN6,ITK,INPP5D,HRAS,BRAF,IKBKB,TRAF6,PLCG2,IKBKG,MALT1,BCL10,CBLB
GO:0050852	T cell receptor signaling pathway	27	103	0.8	1.72	3.46e-11	9606.ENSP00000215832,9606.ENSP00000220751,9606.ENSP00000244007,9606.ENSP00000263967,9606.ENSP00000264316,9606.ENSP00000264972,9606.ENSP00000324890,9606.ENSP00000326366,9606.ENSP00000346300,9606.ENSP00000346671,9606.ENSP00000358335,9606.ENSP00000361965,9606.ENSP00000366563,9606.ENSP00000379873,9606.ENSP00000391592,9606.ENSP00000393978,9606.ENSP00000398655,9606.ENSP00000405338,9606.ENSP00000407586,…	MAPK1,RIPK2,PLCG1,PIK3CA,TXK,ZAP70,CD28,PSEN1,CRKL,FYN,MAP3K7,ADA,PIK3CD,HLA-A,PTPN6,PRKD2,ITK,INPP5D,HRAS,BRAF,IKBKB,TRAF6,PLCG2,IKBKG,MALT1,BCL10,CBLB
GO:0050853	B cell receptor signaling pathway	17	50	1.0	1.77	1.29e-09	MAPK1,BLNK,BAX,CD19,VAV3,SYK,PIK3CD,NFATC2,PTPN6,ITK,LYN,IGHV3-16,IGHV3-72,IGHV3-43D,PLCG2,BTK,PRKCB
GO:0050853	B cell receptor signaling pathway	18	50	0.94	1.68	2.40e-09	9606.ENSP00000215832,9606.ENSP00000293288,9606.ENSP00000313419,9606.ENSP00000359073,9606.ENSP00000364898,9606.ENSP00000366563,9606.ENSP00000379330,9606.ENSP00000381185,9606.ENSP00000391592,9606.ENSP00000398655,9606.ENSP00000428924,9606.ENSP00000431254,9606.ENSP00000478289,9606.ENSP00000480035,9606.ENSP00000481152,9606.ENSP00000482457,9606.ENSP00000483570,9606.ENSP00000496129	MAPK1,BAX,CD19,VAV3,SYK,PIK3CD,NFATC2,BCL2,PTPN6,ITK,LYN,IGLL5,LOC102723407,IGHV3-72,IGHV3-43D,PLCG2,BTK,PRKCB
GO:0050856	Regulation of T cell receptor signaling pathway	9	45	0.77	0.69	0.00080	DUSP3,EZR,ADA,RELA,PTPN6,IKBKG,MALT1,BCL10,CBLB
GO:0050856	Regulation of T cell receptor signaling pathway	11	45	0.77	0.84	0.00012	9606.ENSP00000226004,9606.ENSP00000311857,9606.ENSP00000338934,9606.ENSP00000361965,9606.ENSP00000384273,9606.ENSP00000391592,9606.ENSP00000393978,9606.ENSP00000483825,9606.ENSP00000497997,9606.ENSP00000498104,9606.ENSP00000499037	DUSP3,PTPN2,EZR,ADA,RELA,PTPN6,PRKD2,IKBKG,MALT1,BCL10,CBLB
GO:0050857	Positive regulation of antigen receptor-mediated signaling pathway	5	25	0.77	0.4	0.0220	ADA,RELA,IKBKG,PRKCB,BCL10
GO:0050857	Positive regulation of antigen receptor-mediated signaling pathway	6	25	0.76	0.49	0.0086	9606.ENSP00000361965,9606.ENSP00000384273,9606.ENSP00000393978,9606.ENSP00000483825,9606.ENSP00000496129,9606.ENSP00000498104	ADA,RELA,PRKD2,IKBKG,PRKCB,BCL10
GO:0050862	Positive regulation of T cell receptor signaling pathway	4	16	0.86	0.39	0.0284	ADA,RELA,IKBKG,BCL10
GO:0050862	Positive regulation of T cell receptor signaling pathway	5	16	0.88	0.51	0.0083	9606.ENSP00000361965,9606.ENSP00000384273,9606.ENSP00000393978,9606.ENSP00000483825,9606.ENSP00000498104	ADA,RELA,PRKD2,IKBKG,BCL10
GO:0050871	Positive regulation of B cell activation	23	92	0.78	1.48	3.00e-09	9606.ENSP00000221930,9606.ENSP00000226730,9606.ENSP00000248244,9606.ENSP00000300134,9606.ENSP00000324890,9606.ENSP00000353874,9606.ENSP00000359073,9606.ENSP00000361965,9606.ENSP00000363089,9606.ENSP00000363318,9606.ENSP00000364898,9606.ENSP00000365016,9606.ENSP00000376445,9606.ENSP00000378040,9606.ENSP00000379330,9606.ENSP00000381185,9606.ENSP00000384849,9606.ENSP00000405338,9606.ENSP00000431254,…	TGFB1,IL2,TICAM1,STAT6,CD28,TLR9,VAV3,ADA,TLR4,IL2RG,SYK,IRS2,TIRAP,BAD,NFATC2,BCL2,CDKN1A,INPP5D,IGLL5,LOC102723407,IGHV3-72,IGHV3-43D,BTK
GO:0050886	Endocrine process	15	53	0.84	1.21	8.81e-07	9606.ENSP00000155840,9606.ENSP00000226413,9606.ENSP00000256078,9606.ENSP00000261623,9606.ENSP00000297494,9606.ENSP00000299178,9606.ENSP00000355627,9606.ENSP00000356094,9606.ENSP00000360973,9606.ENSP00000366416,9606.ENSP00000389326,9606.ENSP00000398832,9606.ENSP00000400175,9606.ENSP00000422435,9606.ENSP00000496396	KCNQ1,GNRHR,KRAS,CYBA,NOS3,AVPR1A,AGT,AVPR1B,AGTR2,EDNRB,ACE2,AGTR1,RHOA,RPS6KA2,AVPR2
GO:0050901	Leukocyte tethering or rolling	8	20	0.99	0.92	0.00011	9606.ENSP00000215637,9606.ENSP00000267082,9606.ENSP00000294728,9606.ENSP00000379350,9606.ENSP00000380227,9606.ENSP00000382697,9606.ENSP00000383376,9606.ENSP00000398698	MADCAM1,ITGB7,VCAM1,ITGB1,ITGA4,ROCK1,JAM2,TNF
GO:0050904	Diapedesis	3	7	1.1	0.4	0.0276	CRK,CRKL,ITGA4
GO:0050904	Diapedesis	3	7	1.02	0.37	0.0352	9606.ENSP00000300574,9606.ENSP00000346300,9606.ENSP00000380227	CRK,CRKL,ITGA4
GO:0050927	Positive regulation of positive chemotaxis	5	25	0.77	0.4	0.0220	KDR,ITGA2,SMAD3,CREB3,AGER
GO:0050927	Positive regulation of positive chemotaxis	7	25	0.83	0.63	0.0019	9606.ENSP00000263923,9606.ENSP00000296585,9606.ENSP00000311127,9606.ENSP00000332973,9606.ENSP00000342136,9606.ENSP00000364731,9606.ENSP00000451040	KDR,ITGA2,VEGFB,SMAD3,CREB3,F7,PGF
GO:0050966	Detection of mechanical stimulus involved in sensory perception of pain	5	14	0.94	0.55	0.0054	9606.ENSP00000296585,9606.ENSP00000346671,9606.ENSP00000386884,9606.ENSP00000398698,9606.ENSP00000431418	ITGA2,FYN,CXCR4,TNF,NTRK1
GO:0050994	Regulation of lipid catabolic process	18	62	0.85	1.42	3.65e-08	9606.ENSP00000257904,9606.ENSP00000264637,9606.ENSP00000280155,9606.ENSP00000282096,9606.ENSP00000304895,9606.ENSP00000306124,9606.ENSP00000331602,9606.ENSP00000346148,9606.ENSP00000365016,9606.ENSP00000373700,9606.ENSP00000375892,9606.ENSP00000385523,9606.ENSP00000398698,9606.ENSP00000419260,9606.ENSP00000445002,9606.ENSP00000451828,9606.ENSP00000465356,9606.ENSP00000466775	CDK4,THRA,ADRA2A,PDE3B,IRS1,PRKCE,PRKCD,PRKAA1,IRS2,ALK,AKT2,PPARA,TNF,PIK3CG,APOA5,AKT1,APOC1,APOC2
GO:0050995	Negative regulation of lipid catabolic process	8	26	0.87	0.77	0.00044	9606.ENSP00000280155,9606.ENSP00000282096,9606.ENSP00000346148,9606.ENSP00000373700,9606.ENSP00000398698,9606.ENSP00000419260,9606.ENSP00000451828,9606.ENSP00000465356	ADRA2A,PDE3B,PRKAA1,ALK,TNF,PIK3CG,AKT1,APOC1
GO:0050996	Positive regulation of lipid catabolic process	6	28	0.8	0.51	0.0074	IRS1,PRKCE,PRKCD,IRS2,AKT2,PPARA
GO:0050996	Positive regulation of lipid catabolic process	8	28	0.84	0.73	0.00065	9606.ENSP00000304895,9606.ENSP00000306124,9606.ENSP00000331602,9606.ENSP00000365016,9606.ENSP00000375892,9606.ENSP00000385523,9606.ENSP00000445002,9606.ENSP00000466775	IRS1,PRKCE,PRKCD,IRS2,AKT2,PPARA,APOA5,APOC2
GO:0050999	Regulation of nitric-oxide synthase activity	9	40	0.82	0.76	0.00038	EGFR,CALM3,ATP2B4,PTK2B,ESR1,AKT1,CALM1,CALM2,PIK3CB
GO:0050999	Regulation of nitric-oxide synthase activity	13	40	0.9	1.21	1.72e-06	9606.ENSP00000252486,9606.ENSP00000275493,9606.ENSP00000291295,9606.ENSP00000350310,9606.ENSP00000360973,9606.ENSP00000380638,9606.ENSP00000398698,9606.ENSP00000405330,9606.ENSP00000437955,9606.ENSP00000451828,9606.ENSP00000499717,9606.ENSP00000499797,9606.ENSP00000501150	APOE,EGFR,CALM3,ATP2B4,AGTR2,PTK2B,TNF,ESR1,HIF1A,AKT1,CALM1,CALM2,PIK3CB
GO:0051000	Positive regulation of nitric-oxide synthase activity	7	24	0.93	0.74	0.00071	CALM3,PTK2B,ESR1,AKT1,CALM1,CALM2,PIK3CB
GO:0051000	Positive regulation of nitric-oxide synthase activity	11	24	1.05	1.33	1.04e-06	9606.ENSP00000252486,9606.ENSP00000291295,9606.ENSP00000360973,9606.ENSP00000380638,9606.ENSP00000398698,9606.ENSP00000405330,9606.ENSP00000437955,9606.ENSP00000451828,9606.ENSP00000499717,9606.ENSP00000499797,9606.ENSP00000501150	APOE,CALM3,AGTR2,PTK2B,TNF,ESR1,HIF1A,AKT1,CALM1,CALM2,PIK3CB
GO:0051044	Positive regulation of membrane protein ectodomain proteolysis	4	17	0.76	0.33	0.0473	9606.ENSP00000252486,9606.ENSP00000280155,9606.ENSP00000284981,9606.ENSP00000398698	APOE,ADRA2A,APP,TNF
GO:0051091	Positive regulation of DNA-binding transcription factor activity	56	267	0.79	2.43	1.16e-22	RIPK2,TRAF2,TICAM1,IRAK2,LAMTOR5,RIPK1,TLR2,TRAF5,PRKCQ,EP300,ATF2,ADCY8,PPARG,KIT,PRKCI,ADCY1,FOSL1,SMAD3,RPS6KA4,TRADD,ESR2,TLR9,ARHGEF2,AGT,MAP3K7,IRAK1,CHUK,CARD9,PTEN,TLR4,AR,AGER,PRKCZ,JAK2,ALK,TIRAP,PPP3CA,ITGB2,RELA,TLR6,MAVS,ESR1,IKBKB,NTRK1,TRAF6,DDIT3,AKT1,RPS6KA5,PLCG2,BTK,IKBKG,PRKCB,MALT1,BCL10,MYD88,CAMK2A
GO:0051091	Positive regulation of DNA-binding transcription factor activity	67	267	0.78	2.63	1.10e-26	9606.ENSP00000220751,9606.ENSP00000221930,9606.ENSP00000247668,9606.ENSP00000248244,9606.ENSP00000256458,9606.ENSP00000259808,9606.ENSP00000260010,9606.ENSP00000261464,9606.ENSP00000263125,9606.ENSP00000263253,9606.ENSP00000264110,9606.ENSP00000264657,9606.ENSP00000264867,9606.ENSP00000284981,9606.ENSP00000286355,9606.ENSP00000287820,9606.ENSP00000288135,9606.ENSP00000293549,9606.ENSP00000295797,…	RIPK2,TGFB1,TRAF2,TICAM1,IRAK2,RIPK1,TLR2,TRAF5,PRKCQ,EP300,ATF2,STAT3,PPARGC1A,APP,ADCY8,PPARG,KIT,WNT1,PRKCI,ADCY1,FOSL1,SMAD3,RPS6KA4,TRADD,ESR2,COPS5,TLR9,AGT,CRTC2,MAP3K7,IRAK1,CHUK,CARD9,PTEN,TLR4,AR,PRKCZ,NKX3-1,JAK2,ALK,TIRAP,PPP3CA,ITGB2,RELA,TLR6,PRKD1,LPAR5,PRKD2,TNF,MAVS,ESR1,IKBKB,NTRK1,TRAF6,DDIT3,AKT1,IKBKE,RPS6KA5,PLCG2,BTK,IKBKG,CTNNB1,PRKCB,MALT1,BCL10,MYD88,CAMK2A
GO:0051092	Positive regulation of NF-kappaB transcription factor activity	41	157	0.88	2.55	2.04e-19	RIPK2,TRAF2,TICAM1,IRAK2,LAMTOR5,RIPK1,TLR2,TRAF5,PRKCQ,EP300,PRKCI,RPS6KA4,TRADD,TLR9,ARHGEF2,AGT,MAP3K7,IRAK1,CHUK,CARD9,TLR4,AR,AGER,PRKCZ,ALK,TIRAP,ITGB2,RELA,TLR6,IKBKB,NTRK1,TRAF6,RPS6KA5,PLCG2,BTK,IKBKG,PRKCB,MALT1,BCL10,MYD88,CAMK2A
GO:0051092	Positive regulation of NF-kappaB transcription factor activity	44	157	0.83	2.41	5.51e-19	9606.ENSP00000220751,9606.ENSP00000221930,9606.ENSP00000247668,9606.ENSP00000248244,9606.ENSP00000256458,9606.ENSP00000259808,9606.ENSP00000260010,9606.ENSP00000261464,9606.ENSP00000263125,9606.ENSP00000263253,9606.ENSP00000264657,9606.ENSP00000284981,9606.ENSP00000295797,9606.ENSP00000333896,9606.ENSP00000341268,9606.ENSP00000353874,9606.ENSP00000355627,9606.ENSP00000358335,9606.ENSP00000358997,…	RIPK2,TGFB1,TRAF2,TICAM1,IRAK2,RIPK1,TLR2,TRAF5,PRKCQ,EP300,STAT3,APP,PRKCI,RPS6KA4,TRADD,TLR9,AGT,MAP3K7,IRAK1,CHUK,CARD9,TLR4,AR,PRKCZ,ALK,TIRAP,ITGB2,RELA,TLR6,PRKD1,PRKD2,TNF,IKBKB,NTRK1,TRAF6,RPS6KA5,PLCG2,BTK,IKBKG,PRKCB,MALT1,BCL10,MYD88,CAMK2A
GO:0051142	Positive regulation of NK T cell proliferation	8	10	1.29	1.34	2.85e-06	9606.ENSP00000228534,9606.ENSP00000231228,9606.ENSP00000262345,9606.ENSP00000303231,9606.ENSP00000321345,9606.ENSP00000371067,9606.ENSP00000431885,9606.ENSP00000470788	IL23A,IL12B,IL12RB2,IL12A,IL23R,JAK2,TYK2,IL12RB1
GO:0051150	Regulation of smooth muscle cell differentiation	6	30	0.77	0.48	0.0097	KIT,NFATC3,FOXO4,NFATC2,NFATC1,FGFR2
GO:0051151	Negative regulation of smooth muscle cell differentiation	4	16	0.86	0.39	0.0284	NFATC3,FOXO4,NFATC2,NFATC1
GO:0051151	Negative regulation of smooth muscle cell differentiation	4	16	0.78	0.34	0.0407	9606.ENSP00000300659,9606.ENSP00000363377,9606.ENSP00000379330,9606.ENSP00000389377	NFATC3,FOXO4,NFATC2,NFATC1
GO:0051208	Sequestering of calcium ion	3	5	1.16	0.44	0.0192	9606.ENSP00000299767,9606.ENSP00000320866,9606.ENSP00000326366	HSP90B1,CALR,PSEN1
GO:0051231	Spindle elongation	7	13	1.2	1.08	3.67e-05	KIF23,KIF11,BIRC5,PPP2R1A,KIF4A,PRC1,RACGAP1
GO:0051256	Mitotic spindle midzone assembly	5	11	1.12	0.7	0.0015	KIF23,BIRC5,KIF4A,PRC1,RACGAP1
GO:0051279	Regulation of release of sequestered calcium ion into cytosol	21	84	0.86	1.63	9.35e-10	PLCG1,CYBA,CACNA1C,CALM3,BAX,PRKCE,PRKACA,CD19,PDPK1,PLN,RYR2,DIAPH1,PTK2B,SLC8A1,PTPN6,CAMK2D,LYN,ITGB3,NOS1,CALM1,CALM2
GO:0051279	Regulation of release of sequestered calcium ion into cytosol	28	84	0.91	2.15	1.13e-13	9606.ENSP00000216629,9606.ENSP00000221930,9606.ENSP00000244007,9606.ENSP00000248076,9606.ENSP00000261623,9606.ENSP00000266376,9606.ENSP00000291295,9606.ENSP00000293288,9606.ENSP00000306124,9606.ENSP00000308541,9606.ENSP00000309591,9606.ENSP00000313419,9606.ENSP00000321326,9606.ENSP00000344220,9606.ENSP00000350132,9606.ENSP00000355533,9606.ENSP00000368767,9606.ENSP00000380638,9606.ENSP00000384763,…	BDKRB1,TGFB1,PLCG1,F2RL3,CYBA,CACNA1C,CALM3,BAX,PRKCE,F2,PRKACA,CD19,F2R,PDPK1,PLN,RYR2,ASPH,PTK2B,SLC8A1,PRKD1,PTPN6,CAMK2D,LYN,ITGB3,NOS1,CALM1,CALM2,SNCA
GO:0051280	Negative regulation of release of sequestered calcium ion into cytosol	4	13	0.87	0.4	0.0237	9606.ENSP00000221930,9606.ENSP00000291295,9606.ENSP00000499717,9606.ENSP00000499797	TGFB1,CALM3,CALM1,CALM2
GO:0051281	Positive regulation of release of sequestered calcium ion into cytosol	13	43	0.86	1.14	3.31e-06	9606.ENSP00000216629,9606.ENSP00000244007,9606.ENSP00000248076,9606.ENSP00000291295,9606.ENSP00000293288,9606.ENSP00000308541,9606.ENSP00000313419,9606.ENSP00000321326,9606.ENSP00000344220,9606.ENSP00000368767,9606.ENSP00000499717,9606.ENSP00000499797,9606.ENSP00000500990	BDKRB1,PLCG1,F2RL3,CALM3,BAX,F2,CD19,F2R,PDPK1,ASPH,CALM1,CALM2,SNCA
GO:0051282	Regulation of sequestering of calcium ion	26	130	0.77	1.55	3.51e-10	PLCG1,CYBA,CACNA1C,CALM3,BAX,PRKCE,PRKACA,CD19,PDPK1,PLN,RYR2,ITPR3,ITPR2,DIAPH1,PTK2B,SLC8A1,PTPN6,CAMK2D,LYN,DDIT3,ITGB3,TRPV1,NOS1,PLCG2,CALM1,CALM2
GO:0051282	Regulation of sequestering of calcium ion	36	130	0.83	2.14	1.95e-15	9606.ENSP00000216629,9606.ENSP00000221930,9606.ENSP00000244007,9606.ENSP00000248076,9606.ENSP00000261623,9606.ENSP00000266376,9606.ENSP00000291295,9606.ENSP00000293288,9606.ENSP00000306124,9606.ENSP00000306253,9606.ENSP00000308541,9606.ENSP00000309591,9606.ENSP00000313419,9606.ENSP00000321326,9606.ENSP00000344220,9606.ENSP00000350132,9606.ENSP00000352608,9606.ENSP00000355533,9606.ENSP00000363435,…	BDKRB1,TGFB1,PLCG1,F2RL3,CYBA,CACNA1C,CALM3,BAX,PRKCE,ITPR1,F2,PRKACA,CD19,F2R,PDPK1,PLN,RYR1,RYR2,ITPR3,ASPH,ITPR2,PTK2B,SLC8A1,PRKD1,PTPN6,CAMK2D,LYN,DDIT3,ITGB3,TRPV1,NOS1,PLCG2,RYR3,CALM1,CALM2,SNCA
GO:0051284	Positive regulation of sequestering of calcium ion	4	15	0.89	0.4	0.0240	CALM3,RYR2,CALM1,CALM2
GO:0051284	Positive regulation of sequestering of calcium ion	5	15	0.91	0.53	0.0068	9606.ENSP00000221930,9606.ENSP00000291295,9606.ENSP00000355533,9606.ENSP00000499717,9606.ENSP00000499797	TGFB1,CALM3,RYR2,CALM1,CALM2
GO:0051315	Attachment of mitotic spindle microtubules to kinetochore	5	13	1.05	0.64	0.0025	NDC80,CENPE,NUF2,KIF2C,SEH1L
GO:0051342	Regulation of cyclic-nucleotide phosphodiesterase activity	4	10	0.99	0.48	0.0122	9606.ENSP00000279146,9606.ENSP00000291295,9606.ENSP00000499717,9606.ENSP00000499797	AIP,CALM3,CALM1,CALM2
GO:0051343	Positive regulation of cyclic-nucleotide phosphodiesterase activity	3	5	1.24	0.47	0.0148	CALM3,CALM1,CALM2
GO:0051343	Positive regulation of cyclic-nucleotide phosphodiesterase activity	3	5	1.16	0.44	0.0192	9606.ENSP00000291295,9606.ENSP00000499717,9606.ENSP00000499797	CALM3,CALM1,CALM2
GO:0051347	Positive regulation of transferase activity	119	586	0.77	3.05	1.65e-48	MAPK1,TAB1,IL2,CCND1,CDKN1B,SLC8A2,FLT3,CDC25B,TRAF2,PIN1,CCNB1,CAMK1,PDGFRA,SPDYE1,PDGFRB,TELO2,MAP2K2,MAPK3,PRKCQ,NOX4,KDR,PIK3CA,RAPGEF2,CENPE,DAXX,ERBB3,IQGAP1,ERBB2,EGFR,ADCY8,PRKAG2,KIT,NCF1,CALM3,FGFR4,LRRK2,PLK1,TPX2,MAP2K1,INSR,IRS1,RPTOR,RASGRP1,CKS1B,CD19,MET,PRKAG1,SPDYE3,PRKCD,HSP90AA1,SPDYA,FGFR3,MAPT,PTK2,ERBB4,PDPK1,MAP2K3,DLG1,UBE2C,ATP2B4,MAP3K5,TLR9,MTOR,AGT,KIF14,TAB2,MAP3K7,R…
GO:0051349	Positive regulation of lyase activity	13	54	0.77	0.95	2.50e-05	9606.ENSP00000266376,9606.ENSP00000288139,9606.ENSP00000291295,9606.ENSP00000297494,9606.ENSP00000315011,9606.ENSP00000327251,9606.ENSP00000378207,9606.ENSP00000401888,9606.ENSP00000477999,9606.ENSP00000482568,9606.ENSP00000496396,9606.ENSP00000499717,9606.ENSP00000499797	CACNA1C,CACNA1D,CALM3,NOS3,EDNRA,NOS2,AKAP5,RAF1,NOS1,ORAI1,AVPR2,CALM1,CALM2
GO:0051353	Positive regulation of oxidoreductase activity	17	61	0.83	1.32	1.58e-07	9606.ENSP00000252486,9606.ENSP00000261623,9606.ENSP00000291295,9606.ENSP00000312999,9606.ENSP00000355627,9606.ENSP00000358867,9606.ENSP00000360973,9606.ENSP00000380638,9606.ENSP00000398698,9606.ENSP00000398832,9606.ENSP00000405330,9606.ENSP00000437955,9606.ENSP00000451828,9606.ENSP00000499717,9606.ENSP00000499797,9606.ENSP00000500990,9606.ENSP00000501150	APOE,CYBA,CALM3,GNAI2,AGT,GNAI3,AGTR2,PTK2B,TNF,AGTR1,ESR1,HIF1A,AKT1,CALM1,CALM2,SNCA,PIK3CB
GO:0051383	Kinetochore organization	5	21	0.84	0.46	0.0124	DLGAP5,NDC80,CENPE,NUF2,CENPF
GO:0051385	Response to mineralocorticoid	13	39	0.99	1.41	2.36e-07	CCND1,FOSB,CYBA,CALM3,FOS,FOSL1,FOXO3,SRC,CYBB,ATP2B1,IGF1R,CALM1,CALM2
GO:0051385	Response to mineralocorticoid	15	39	0.97	1.53	3.61e-08	9606.ENSP00000227507,9606.ENSP00000245919,9606.ENSP00000261623,9606.ENSP00000291295,9606.ENSP00000299178,9606.ENSP00000306245,9606.ENSP00000310170,9606.ENSP00000339527,9606.ENSP00000356832,9606.ENSP00000362680,9606.ENSP00000370571,9606.ENSP00000482169,9606.ENSP00000497069,9606.ENSP00000499717,9606.ENSP00000499797	CCND1,FOSB,CYBA,CALM3,AVPR1A,FOS,FOSL1,FOXO3,SGK1,SRC,TH,NEFL,IGF1R,CALM1,CALM2
GO:0051402	Neuron apoptotic process	26	91	0.84	1.81	1.75e-11	9606.ENSP00000172229,9606.ENSP00000256078,9606.ENSP00000264110,9606.ENSP00000264867,9606.ENSP00000267101,9606.ENSP00000269305,9606.ENSP00000284981,9606.ENSP00000293288,9606.ENSP00000318822,9606.ENSP00000324173,9606.ENSP00000326366,9606.ENSP00000330237,9606.ENSP00000349156,9606.ENSP00000351490,9606.ENSP00000360973,9606.ENSP00000365230,9606.ENSP00000375892,9606.ENSP00000379904,9606.ENSP00000381185,…	NGFR,KRAS,ATF2,PPARGC1A,ERBB3,TP53,APP,BAX,BID,HSPA5,PSEN1,CASP9,SIAH1,MAX,AGTR2,BCL2L1,AKT2,THRB,BCL2,ROCK1,RHOA,HRAS,NTRK1,HIF1A,NEFL,SNCA
GO:0051403	Stress-activated MAPK cascade	32	75	1.09	3.24	3.29e-20	MAPK13,MAPK1,RIPK2,NFKB1,MAPK14,ARHGEF6,MAPK3,ATF2,DAXX,LRRK2,SMAD3,MAPK11,MAP2K3,DUSP9,CRKL,MAP3K5,AGT,DUSP10,MAPKAPK2,MAP3K7,IRAK1,CARD9,NOX1,TLR4,MAPK8,MAP2K7,MAPK9,MAP2K4,IKBKB,MAP2K6,IRAK4,MYD88
GO:0051403	Stress-activated MAPK cascade	32	75	1.01	2.83	4.54e-18	9606.ENSP00000211287,9606.ENSP00000215832,9606.ENSP00000220751,9606.ENSP00000226574,9606.ENSP00000229795,9606.ENSP00000263025,9606.ENSP00000264110,9606.ENSP00000266000,9606.ENSP00000332973,9606.ENSP00000333685,9606.ENSP00000345083,9606.ENSP00000345853,9606.ENSP00000346300,9606.ENSP00000348089,9606.ENSP00000351908,9606.ENSP00000355627,9606.ENSP00000355866,9606.ENSP00000356070,9606.ENSP00000358335,…	MAPK13,MAPK1,RIPK2,NFKB1,MAPK14,MAPK3,ATF2,DAXX,SMAD3,MAPK11,MAP2K3,DUSP9,CRKL,ERCC6,MAP3K5,AGT,DUSP10,MAPKAPK2,MAP3K7,IRAK1,CARD9,TLR4,GPS1,MAPK8,MAP2K7,MAPK9,TNF,MAP2K4,IKBKB,MAP2K6,IRAK4,MYD88
GO:0051412	Response to corticosterone	9	19	1.14	1.27	3.50e-06	CCND1,FOSB,CALM3,FOS,FOSL1,FOXO3,ATP2B1,CALM1,CALM2
GO:0051412	Response to corticosterone	11	19	1.15	1.53	1.86e-07	9606.ENSP00000227507,9606.ENSP00000245919,9606.ENSP00000291295,9606.ENSP00000299178,9606.ENSP00000306245,9606.ENSP00000310170,9606.ENSP00000339527,9606.ENSP00000370571,9606.ENSP00000482169,9606.ENSP00000499717,9606.ENSP00000499797	CCND1,FOSB,CALM3,AVPR1A,FOS,FOSL1,FOXO3,TH,NEFL,CALM1,CALM2
GO:0051445	Regulation of meiotic cell cycle	20	64	0.96	1.88	9.92e-11	DUSP1,CDC25B,ANAPC5,CDC25A,INSR,ANAPC2,CDC25C,ANAPC1,CDC16,ASPM,CDC20,CDC26,CDC23,ANAPC7,FBXO43,ANAPC13,RPS6KA2,ANAPC4,CDC27,ANAPC10
GO:0051481	Negative regulation of cytosolic calcium ion concentration	4	15	0.89	0.4	0.0240	SMAD3,SLC8A1,ATP2B1,NOS1
GO:0051481	Negative regulation of cytosolic calcium ion concentration	4	15	0.81	0.36	0.0347	9606.ENSP00000332973,9606.ENSP00000381185,9606.ENSP00000384763,9606.ENSP00000477999	SMAD3,BCL2,SLC8A1,NOS1
GO:0051482	Positive regulation of cytosolic calcium ion concentration involved in phospholipase C-activating G protein-coupled signaling pathway	7	30	0.75	0.55	0.0043	9606.ENSP00000248076,9606.ENSP00000282753,9606.ENSP00000321326,9606.ENSP00000363553,9606.ENSP00000367691,9606.ENSP00000398832,9606.ENSP00000408205	F2RL3,GRM1,F2R,LPAR1,LPAR6,AGTR1,LPAR4
GO:0051492	Regulation of stress fiber assembly	18	92	0.76	1.18	4.78e-07	PIK3R2,PFN1,SLC9A1,PXN,MET,ROCK2,SMAD3,TJP1,MTOR,AMOT,EVL,ROCK1,RAPGEF3,RHOA,BRAF,PIK3R1,ACTG1,CDC42
GO:0051547	Regulation of keratinocyte migration	4	14	0.84	0.38	0.0287	9606.ENSP00000354558,9606.ENSP00000361021,9606.ENSP00000361405,9606.ENSP00000480301	MTOR,PTEN,MMP9,IQSEC1
GO:0051563	Smooth endoplasmic reticulum calcium ion homeostasis	2	2	1.38	0.35	0.0489	9606.ENSP00000284981,9606.ENSP00000326366	APP,PSEN1
GO:0051580	Regulation of neurotransmitter uptake	5	18	0.83	0.46	0.0122	9606.ENSP00000355865,9606.ENSP00000379350,9606.ENSP00000452786,9606.ENSP00000477999,9606.ENSP00000500990	PRKN,ITGB1,ITGB3,NOS1,SNCA
GO:0051589	Negative regulation of neurotransmitter transport	4	14	0.92	0.42	0.0200	RAP1B,RAP1A,BRAF,NOS1
GO:0051589	Negative regulation of neurotransmitter transport	6	14	1.02	0.74	0.00088	9606.ENSP00000250559,9606.ENSP00000355865,9606.ENSP00000358723,9606.ENSP00000419060,9606.ENSP00000477999,9606.ENSP00000500990	RAP1B,PRKN,RAP1A,BRAF,NOS1,SNCA
GO:0051591	Response to cAMP	19	91	0.78	1.3	8.70e-08	KCNQ1,AHR,FOSB,RAP1B,EEF2K,RAPGEF2,FOS,FOSL1,CARM1,EZR,SLC26A3,RAP1A,PFKFB1,ITPR2,PTK2B,KCNE1,SLC8A1,RAPGEF3,PIK3CG
GO:0051591	Response to cAMP	22	91	0.77	1.4	1.22e-08	9606.ENSP00000155840,9606.ENSP00000242057,9606.ENSP00000245919,9606.ENSP00000250559,9606.ENSP00000263026,9606.ENSP00000284981,9606.ENSP00000306245,9606.ENSP00000310170,9606.ENSP00000324173,9606.ENSP00000325690,9606.ENSP00000338934,9606.ENSP00000345873,9606.ENSP00000354394,9606.ENSP00000358723,9606.ENSP00000364145,9606.ENSP00000370542,9606.ENSP00000370744,9606.ENSP00000380638,9606.ENSP00000382226,…	KCNQ1,AHR,FOSB,RAP1B,EEF2K,APP,FOS,FOSL1,HSPA5,CARM1,EZR,SLC26A3,STAT1,RAP1A,PFKFB1,SDC1,ITPR2,PTK2B,KCNE1,SLC8A1,RAPGEF3,PIK3CG
GO:0051592	Response to calcium ion	31	149	0.78	1.79	1.80e-12	CCND1,FOSB,JUND,KCNMB4,ITPKA,EEF2K,IQGAP1,KCNMB1,ADCY8,CALM3,ADCY1,JUNB,FOS,KCNMB3,SCN5A,RASGRP2,PRKAA1,RYR2,JUN,PRKAA2,ITPR3,BAD,PPP3CA,PTK2B,KCNMB2,BRAF,CAMK2D,ACTG1,PLCG2,CALM1,CALM2
GO:0051592	Response to calcium ion	36	149	0.77	1.89	6.69e-14	9606.ENSP00000227507,9606.ENSP00000245919,9606.ENSP00000252818,9606.ENSP00000258111,9606.ENSP00000260356,9606.ENSP00000260386,9606.ENSP00000263026,9606.ENSP00000268182,9606.ENSP00000274629,9606.ENSP00000286355,9606.ENSP00000291295,9606.ENSP00000297323,9606.ENSP00000303315,9606.ENSP00000306245,9606.ENSP00000319370,9606.ENSP00000324173,9606.ENSP00000328968,9606.ENSP00000346148,9606.ENSP00000352608,…	CCND1,FOSB,JUND,KCNMB4,THBS1,ITPKA,EEF2K,IQGAP1,KCNMB1,ADCY8,CALM3,ADCY1,JUNB,FOS,KCNMB3,HSPA5,SCN5A,PRKAA1,RYR1,RYR2,JUN,PRKAA2,ITPR3,ASPH,SDC1,BAD,PPP3CA,PTK2B,KCNMB2,BRAF,CAMK2D,ACTG1,PLCG2,RYR3,CALM1,CALM2
GO:0051599	Response to hydrostatic pressure	3	5	1.24	0.47	0.0148	PIK3CA,ATP2B4,NTRK1
GO:0051599	Response to hydrostatic pressure	3	5	1.16	0.44	0.0192	9606.ENSP00000263967,9606.ENSP00000350310,9606.ENSP00000431418	PIK3CA,ATP2B4,NTRK1
GO:0051602	Response to electrical stimulus	11	44	0.78	0.86	0.00010	9606.ENSP00000225577,9606.ENSP00000263980,9606.ENSP00000282753,9606.ENSP00000295101,9606.ENSP00000320866,9606.ENSP00000361021,9606.ENSP00000362680,9606.ENSP00000370571,9606.ENSP00000385519,9606.ENSP00000431418,9606.ENSP00000440864	RPS6KB1,SLC9A1,GRM1,KCNJ3,CALR,PTEN,SRC,TH,CD14,NTRK1,NR4A1
GO:0051611	Regulation of serotonin uptake	3	4	1.26	0.49	0.0129	9606.ENSP00000452786,9606.ENSP00000477999,9606.ENSP00000500990	ITGB3,NOS1,SNCA
GO:0051621	Regulation of norepinephrine uptake	2	2	1.38	0.35	0.0489	9606.ENSP00000494750,9606.ENSP00000500990	ACTB,SNCA
GO:0051645	Golgi localization	4	14	0.84	0.38	0.0287	9606.ENSP00000262613,9606.ENSP00000360280,9606.ENSP00000379287,9606.ENSP00000497733	SLC9A3R1,DAB1,YWHAZ,CDC42
GO:0051683	Establishment of Golgi localization	3	8	0.96	0.34	0.0453	9606.ENSP00000262613,9606.ENSP00000379287,9606.ENSP00000497733	SLC9A3R1,YWHAZ,CDC42
GO:0051709	Regulation of killing of cells of another organism	4	9	1.03	0.51	0.0093	9606.ENSP00000245907,9606.ENSP00000327251,9606.ENSP00000364898,9606.ENSP00000365230	C3,NOS2,SYK,BCL2L1
GO:0051754	Meiotic sister chromatid cohesion, centromeric	3	5	1.24	0.47	0.0148	BUB1B,BUB1,PPP2R1A
GO:0051770	Positive regulation of nitric-oxide synthase biosynthetic process	10	18	1.21	1.53	2.65e-07	TLR2,KDR,LRRK2,MAP2K3,TLR9,TLR4,JAK2,MAP2K4,JAK3,MAP2K6
GO:0051770	Positive regulation of nitric-oxide synthase biosynthetic process	10	18	1.13	1.37	1.04e-06	9606.ENSP00000260010,9606.ENSP00000263923,9606.ENSP00000345083,9606.ENSP00000353874,9606.ENSP00000354394,9606.ENSP00000363089,9606.ENSP00000371067,9606.ENSP00000410402,9606.ENSP00000432511,9606.ENSP00000468348	TLR2,KDR,MAP2K3,TLR9,STAT1,TLR4,JAK2,MAP2K4,JAK3,MAP2K6
GO:0051784	Negative regulation of nuclear division	10	48	0.78	0.78	0.00026	NDC80,NUF2,BUB1B,PLK1,BIRC5,BUB1,CENPF,CDC20,FBXO43,RPS6KA2
GO:0051823	Regulation of synapse structural plasticity	3	7	1.1	0.4	0.0276	CAMK1,CAMK2B,CTNNA2
GO:0051881	Regulation of mitochondrial membrane potential	15	71	0.79	1.11	2.66e-06	DCN,KDR,BAX,LRRK2,BID,MAPT,SRC,BCL2L1,PIP5KL1,AKT2,BAD,CDKN2A,AKT1,TRPV1,UBB
GO:0051893	Regulation of focal adhesion assembly	14	63	0.81	1.09	4.00e-06	VCL,DUSP3,KDR,SLC9A1,TLN1,ROCK2,SMAD3,PTK2,SLK,PTEN,SRC,ROCK1,RHOA,ACTG1
GO:0051893	Regulation of focal adhesion assembly	15	63	0.76	1.05	5.30e-06	9606.ENSP00000226004,9606.ENSP00000260356,9606.ENSP00000263923,9606.ENSP00000263980,9606.ENSP00000298552,9606.ENSP00000316029,9606.ENSP00000317985,9606.ENSP00000332973,9606.ENSP00000341189,9606.ENSP00000361021,9606.ENSP00000361818,9606.ENSP00000362680,9606.ENSP00000382697,9606.ENSP00000400175,9606.ENSP00000458162	DUSP3,THBS1,KDR,SLC9A1,TSC1,TLN1,ROCK2,SMAD3,PTK2,PTEN,SDC4,SRC,ROCK1,RHOA,ACTG1
GO:0051898	Negative regulation of protein kinase B signaling	8	41	0.75	0.61	0.0021	SLC9A3R1,FLCN,DLG1,PTEN,PPARA,PPP2CA,DDIT3,PIK3CB
GO:0051900	Regulation of mitochondrial depolarization	4	18	0.81	0.35	0.0390	DCN,KDR,LRRK2,SRC
GO:0051917	Regulation of fibrinolysis	5	18	0.83	0.46	0.0122	9606.ENSP00000223095,9606.ENSP00000226218,9606.ENSP00000260356,9606.ENSP00000308541,9606.ENSP00000384957	SERPINE1,VTN,THBS1,F2,F11
GO:0051918	Negative regulation of fibrinolysis	4	13	0.87	0.4	0.0237	9606.ENSP00000223095,9606.ENSP00000226218,9606.ENSP00000260356,9606.ENSP00000308541	SERPINE1,VTN,THBS1,F2
GO:0051928	Positive regulation of calcium ion transport	31	133	0.75	1.68	1.11e-11	9606.ENSP00000216629,9606.ENSP00000244007,9606.ENSP00000248076,9606.ENSP00000261799,9606.ENSP00000263980,9606.ENSP00000288139,9606.ENSP00000291295,9606.ENSP00000293288,9606.ENSP00000308541,9606.ENSP00000313419,9606.ENSP00000321326,9606.ENSP00000342136,9606.ENSP00000344220,9606.ENSP00000353452,9606.ENSP00000355533,9606.ENSP00000360608,9606.ENSP00000363591,9606.ENSP00000368767,9606.ENSP00000378207,…	BDKRB1,PLCG1,F2RL3,PDGFRB,SLC9A1,CACNA1D,CALM3,BAX,F2,CD19,F2R,CREB3,PDPK1,MYLK,RYR2,GRIN1,BAK1,ASPH,AKAP5,PPP3CB,PPP3CA,PPP3CC,KCNE1,JAK3,PLCG2,ORAI1,PPP3R2,CALM1,CALM2,CAMK2A,SNCA
GO:0051955	Regulation of amino acid transport	10	43	0.75	0.74	0.00040	9606.ENSP00000262461,9606.ENSP00000299178,9606.ENSP00000326366,9606.ENSP00000355627,9606.ENSP00000356094,9606.ENSP00000369647,9606.ENSP00000379350,9606.ENSP00000389326,9606.ENSP00000398698,9606.ENSP00000500990	SLC12A2,AVPR1A,PSEN1,AGT,AVPR1B,AVP,ITGB1,ACE2,TNF,SNCA
GO:0051957	Positive regulation of amino acid transport	8	25	0.89	0.79	0.00036	9606.ENSP00000262461,9606.ENSP00000299178,9606.ENSP00000326366,9606.ENSP00000355627,9606.ENSP00000356094,9606.ENSP00000369647,9606.ENSP00000379350,9606.ENSP00000389326	SLC12A2,AVPR1A,PSEN1,AGT,AVPR1B,AVP,ITGB1,ACE2
GO:0051969	Regulation of transmission of nerve impulse	5	17	0.85	0.48	0.0101	9606.ENSP00000296585,9606.ENSP00000299178,9606.ENSP00000355627,9606.ENSP00000356646,9606.ENSP00000369647	ITGA2,AVPR1A,AGT,TNR,AVP
GO:0051972	Regulation of telomerase activity	10	51	0.76	0.74	0.00039	MAPK1,MAPK3,PRKCQ,TP53,PPARG,HSP90AA1,SRC,MAP2K7,MAPKAPK5,PTGES3
GO:0051972	Regulation of telomerase activity	12	51	0.76	0.87	6.96e-05	9606.ENSP00000215832,9606.ENSP00000263025,9606.ENSP00000263125,9606.ENSP00000269305,9606.ENSP00000287820,9606.ENSP00000335153,9606.ENSP00000360609,9606.ENSP00000362680,9606.ENSP00000381070,9606.ENSP00000449381,9606.ENSP00000482075,9606.ENSP00000495360	MAPK1,MAPK3,PRKCQ,TP53,PPARG,HSP90AA1,HSP90AB1,SRC,MAP2K7,MAPKAPK5,PTGES3,CTNNB1
GO:0051973	Positive regulation of telomerase activity	7	34	0.78	0.57	0.0037	MAPK1,MAPK3,PRKCQ,HSP90AA1,MAP2K7,MAPKAPK5,PTGES3
GO:0051973	Positive regulation of telomerase activity	9	34	0.81	0.76	0.00041	9606.ENSP00000215832,9606.ENSP00000263025,9606.ENSP00000263125,9606.ENSP00000335153,9606.ENSP00000360609,9606.ENSP00000381070,9606.ENSP00000449381,9606.ENSP00000482075,9606.ENSP00000495360	MAPK1,MAPK3,PRKCQ,HSP90AA1,HSP90AB1,MAP2K7,MAPKAPK5,PTGES3,CTNNB1
GO:0051983	Regulation of chromosome segregation	25	128	0.76	1.48	1.29e-09	DUSP1,DLGAP5,CCNB1,NDC80,ANAPC5,CENPE,RB1,NUF2,BUB1B,PLK1,BIRC5,BUB1,ANAPC2,ANAPC1,CDC16,UBE2C,CENPF,KIF2C,CDC20,CDC26,CDC23,ANAPC7,ANAPC4,CDC27,ACTB
GO:0051988	Regulation of attachment of spindle microtubules to kinetochore	4	19	0.79	0.34	0.0446	CCNB1,BIRC5,RACGAP1,CDC42
GO:0055022	Negative regulation of cardiac muscle tissue growth	7	25	0.83	0.63	0.0019	9606.ENSP00000222330,9606.ENSP00000333685,9606.ENSP00000361021,9606.ENSP00000367545,9606.ENSP00000385523,9606.ENSP00000394033,9606.ENSP00000444198	GSK3A,MAPK11,PTEN,TP73,PPARA,KCNK2,CITED2
GO:0055025	Positive regulation of cardiac muscle tissue development	2	2	1.46	0.36	0.0445	ERBB3,CREB1
GO:0055025	Positive regulation of cardiac muscle tissue development	2	2	1.38	0.35	0.0489	9606.ENSP00000267101,9606.ENSP00000387699	ERBB3,CREB1
GO:0055094	Response to lipoprotein particle	10	28	1.02	1.18	5.76e-06	TICAM1,PPARG,FCER1G,TLR4,SYK,ITGB1,ITGB2,TLR6,AKT1,MYD88
GO:0055094	Response to lipoprotein particle	10	28	0.94	1.04	2.10e-05	9606.ENSP00000248244,9606.ENSP00000287820,9606.ENSP00000289902,9606.ENSP00000363089,9606.ENSP00000364898,9606.ENSP00000379350,9606.ENSP00000380948,9606.ENSP00000389600,9606.ENSP00000451828,9606.ENSP00000498321	TICAM1,PPARG,FCER1G,TLR4,SYK,ITGB1,ITGB2,TLR6,AKT1,MYD88
GO:0055117	Regulation of cardiac muscle contraction	19	74	0.87	1.55	5.04e-09	KCNQ1,SLC9A1,CACNA1C,CALM3,PRKACA,SCN5A,HSP90AA1,TNNI3,DLG1,PLN,RYR2,SLC8A1,ACE2,CTNNA3,PIK3CG,CAMK2D,NOS1,CALM1,CALM2
GO:0055117	Regulation of cardiac muscle contraction	20	74	0.82	1.44	1.41e-08	9606.ENSP00000155840,9606.ENSP00000263980,9606.ENSP00000266376,9606.ENSP00000291295,9606.ENSP00000306662,9606.ENSP00000309591,9606.ENSP00000328968,9606.ENSP00000335153,9606.ENSP00000345731,9606.ENSP00000350132,9606.ENSP00000355533,9606.ENSP00000368767,9606.ENSP00000369960,9606.ENSP00000384763,9606.ENSP00000389326,9606.ENSP00000419260,9606.ENSP00000425824,9606.ENSP00000477999,9606.ENSP00000499717,…	KCNQ1,SLC9A1,CACNA1C,CALM3,ADRA1B,PRKACA,SCN5A,HSP90AA1,DLG1,PLN,RYR2,ASPH,ADRA1A,SLC8A1,ACE2,PIK3CG,CAMK2D,NOS1,CALM1,CALM2
GO:0055119	Relaxation of cardiac muscle	4	15	0.89	0.4	0.0240	PIK3CA,PLN,SLC8A1,CAMK2D
GO:0055119	Relaxation of cardiac muscle	4	15	0.81	0.36	0.0347	9606.ENSP00000263967,9606.ENSP00000350132,9606.ENSP00000384763,9606.ENSP00000425824	PIK3CA,PLN,SLC8A1,CAMK2D
GO:0060008	Sertoli cell differentiation	5	21	0.76	0.41	0.0198	9606.ENSP00000254066,9606.ENSP00000357564,9606.ENSP00000362690,9606.ENSP00000370542,9606.ENSP00000431418	RARA,RAB13,NR5A1,SDC1,NTRK1
GO:0060020	Bergmann glial cell differentiation	4	11	1.03	0.5	0.0107	MAPK1,MAPK3,MAP2K1,PTPN11
GO:0060020	Bergmann glial cell differentiation	4	11	0.94	0.45	0.0154	9606.ENSP00000215832,9606.ENSP00000263025,9606.ENSP00000302486,9606.ENSP00000489597	MAPK1,MAPK3,MAP2K1,PTPN11
GO:0060022	Hard palate development	3	8	1.04	0.37	0.0357	ITGB8,ITGB6,DLG1
GO:0060022	Hard palate development	3	8	0.96	0.34	0.0453	9606.ENSP00000222573,9606.ENSP00000283249,9606.ENSP00000345731	ITGB8,ITGB6,DLG1
GO:0060044	Negative regulation of cardiac muscle cell proliferation	5	13	0.97	0.58	0.0043	9606.ENSP00000333685,9606.ENSP00000361021,9606.ENSP00000367545,9606.ENSP00000394033,9606.ENSP00000444198	MAPK11,PTEN,TP73,KCNK2,CITED2
GO:0060047	Heart contraction	25	92	0.9	1.97	3.15e-12	KCNQ1,PIK3CA,SLC9A1,KCNN2,CACNA1C,GJA1,CACNA1D,KCNJ3,SCN4B,SCN5A,TNNI3,MAP2K3,MTOR,RYR2,MYLK2,KCNE1,NEDD4L,SLC8A1,SCN1B,RPS6KA2,CAMK2D,KCNJ5,MAP2K6,KCNE1B,CDC42
GO:0060047	Heart contraction	25	92	0.82	1.69	1.14e-10	9606.ENSP00000155840,9606.ENSP00000263967,9606.ENSP00000263980,9606.ENSP00000264773,9606.ENSP00000266376,9606.ENSP00000288139,9606.ENSP00000295101,9606.ENSP00000311127,9606.ENSP00000322460,9606.ENSP00000328968,9606.ENSP00000345083,9606.ENSP00000352011,9606.ENSP00000354558,9606.ENSP00000355533,9606.ENSP00000365162,9606.ENSP00000382226,9606.ENSP00000384763,9606.ENSP00000386884,9606.ENSP00000396915,…	KCNQ1,PIK3CA,SLC9A1,KCNN2,CACNA1C,CACNA1D,KCNJ3,VEGFB,SCN4B,SCN5A,MAP2K3,CACNA1G,MTOR,RYR2,MYLK2,KCNE1,SLC8A1,CXCR4,SCN1B,RPS6KA2,CAMK2D,KCNJ5,MAP2K6,KCNE1B,CDC42
GO:0060048	Cardiac muscle contraction	23	76	0.95	2.02	4.67e-12	KCNQ1,PIK3CA,SLC9A1,KCNN2,CACNA1C,GJA1,CACNA1D,KCNJ3,SCN4B,SCN5A,TNNI3,MAP2K3,MTOR,RYR2,MYLK2,KCNE1,NEDD4L,SLC8A1,SCN1B,CAMK2D,KCNJ5,MAP2K6,KCNE1B
GO:0060048	Cardiac muscle contraction	23	76	0.86	1.75	1.30e-10	9606.ENSP00000155840,9606.ENSP00000263967,9606.ENSP00000263980,9606.ENSP00000264773,9606.ENSP00000266376,9606.ENSP00000288139,9606.ENSP00000295101,9606.ENSP00000311127,9606.ENSP00000322460,9606.ENSP00000328968,9606.ENSP00000345083,9606.ENSP00000352011,9606.ENSP00000354558,9606.ENSP00000355533,9606.ENSP00000365162,9606.ENSP00000382226,9606.ENSP00000384763,9606.ENSP00000386884,9606.ENSP00000396915,…	KCNQ1,PIK3CA,SLC9A1,KCNN2,CACNA1C,CACNA1D,KCNJ3,VEGFB,SCN4B,SCN5A,MAP2K3,CACNA1G,MTOR,RYR2,MYLK2,KCNE1,SLC8A1,CXCR4,SCN1B,CAMK2D,KCNJ5,MAP2K6,KCNE1B
GO:0060055	Angiogenesis involved in wound healing	4	15	0.89	0.4	0.0240	KDR,PRCP,ITGB3,PIK3CB
GO:0060055	Angiogenesis involved in wound healing	5	15	0.91	0.53	0.0068	9606.ENSP00000263923,9606.ENSP00000377055,9606.ENSP00000384262,9606.ENSP00000452786,9606.ENSP00000501150	KDR,PRCP,HPSE,ITGB3,PIK3CB
GO:0060068	Vagina development	4	10	0.99	0.48	0.0122	9606.ENSP00000293288,9606.ENSP00000363591,9606.ENSP00000405330,9606.ENSP00000496870	BAX,BAK1,ESR1,LRP2
GO:0060100	Positive regulation of phagocytosis, engulfment	4	14	0.84	0.38	0.0287	9606.ENSP00000245907,9606.ENSP00000287820,9606.ENSP00000296585,9606.ENSP00000482457	C3,PPARG,ITGA2,PLCG2
GO:0060143	Positive regulation of syncytium formation by plasma membrane fusion	5	24	0.78	0.42	0.0193	MAPK14,CAMK1,CAPN2,NFATC2,RAPGEF3
GO:0060191	Regulation of lipase activity	28	88	0.89	2.07	2.86e-13	9606.ENSP00000243077,9606.ENSP00000257290,9606.ENSP00000261799,9606.ENSP00000264316,9606.ENSP00000275493,9606.ENSP00000282397,9606.ENSP00000286548,9606.ENSP00000288135,9606.ENSP00000299178,9606.ENSP00000315011,9606.ENSP00000344220,9606.ENSP00000355627,9606.ENSP00000356094,9606.ENSP00000363553,9606.ENSP00000367830,9606.ENSP00000369960,9606.ENSP00000393312,9606.ENSP00000398655,9606.ENSP00000398832,…	LRP1,PDGFRA,PDGFRB,TXK,EGFR,FLT1,GNAQ,KIT,AVPR1A,EDNRA,PDPK1,AGT,AVPR1B,LPAR1,PRKCZ,ADRA1A,FGFR1,ITK,AGTR1,RHOA,GNA13,ESR1,HRAS,LPAR2,APOA5,APOC1,APOC2,SNCA
GO:0060193	Positive regulation of lipase activity	16	67	0.84	1.29	2.71e-07	PDGFRA,PDGFRB,TXK,EGFR,KIT,FGFR3,PDPK1,AGT,PRKCZ,FGFR1,ITK,RHOA,ESR1,HRAS,FGFR2,RASGRP4
GO:0060193	Positive regulation of lipase activity	25	67	0.96	2.18	3.96e-13	9606.ENSP00000257290,9606.ENSP00000261799,9606.ENSP00000264316,9606.ENSP00000275493,9606.ENSP00000282397,9606.ENSP00000286548,9606.ENSP00000288135,9606.ENSP00000299178,9606.ENSP00000315011,9606.ENSP00000344220,9606.ENSP00000355627,9606.ENSP00000356094,9606.ENSP00000363553,9606.ENSP00000367830,9606.ENSP00000369960,9606.ENSP00000393312,9606.ENSP00000398655,9606.ENSP00000398832,9606.ENSP00000400175,…	PDGFRA,PDGFRB,TXK,EGFR,FLT1,GNAQ,KIT,AVPR1A,EDNRA,PDPK1,AGT,AVPR1B,LPAR1,PRKCZ,ADRA1A,FGFR1,ITK,AGTR1,RHOA,GNA13,ESR1,HRAS,LPAR2,APOA5,APOC2
GO:0060263	Regulation of respiratory burst	4	16	0.86	0.39	0.0284	RAC2,NCF1,INSR,DUSP10
GO:0060291	Long-term synaptic potentiation	10	47	0.79	0.8	0.00022	MAPK1,SLC8A2,PRKCG,RASGRF2,PTEN,ITPR3,PRKCZ,SLC8A3,PTK2B,BRAF
GO:0060291	Long-term synaptic potentiation	14	47	0.86	1.2	1.40e-06	9606.ENSP00000215832,9606.ENSP00000236877,9606.ENSP00000263431,9606.ENSP00000265080,9606.ENSP00000332549,9606.ENSP00000356646,9606.ENSP00000361021,9606.ENSP00000363435,9606.ENSP00000367830,9606.ENSP00000370669,9606.ENSP00000380638,9606.ENSP00000386229,9606.ENSP00000419060,9606.ENSP00000500990	MAPK1,SLC8A2,PRKCG,RASGRF2,GRIN2A,TNR,PTEN,ITPR3,PRKCZ,SLC8A3,PTK2B,RGS14,BRAF,SNCA
GO:0060306	Regulation of membrane repolarization	8	34	0.84	0.71	0.00077	KCNQ1,CACNA1D,SCN4B,SCN5A,KCNE1,NEDD4L,SCN1B,KCNE1B
GO:0060307	Regulation of ventricular cardiac muscle cell membrane repolarization	6	22	0.9	0.61	0.0028	KCNQ1,SCN4B,SCN5A,KCNE1,SCN1B,KCNE1B
GO:0060307	Regulation of ventricular cardiac muscle cell membrane repolarization	6	22	0.82	0.54	0.0052	9606.ENSP00000155840,9606.ENSP00000322460,9606.ENSP00000328968,9606.ENSP00000382226,9606.ENSP00000396915,9606.ENSP00000477875	KCNQ1,SCN4B,SCN5A,KCNE1,SCN1B,KCNE1B
GO:0060314	Regulation of ryanodine-sensitive calcium-release channel activity	7	27	0.88	0.68	0.0012	CALM3,PRKACA,PLN,CAMK2D,NOS1,CALM1,CALM2
GO:0060314	Regulation of ryanodine-sensitive calcium-release channel activity	8	27	0.86	0.75	0.00054	9606.ENSP00000291295,9606.ENSP00000309591,9606.ENSP00000350132,9606.ENSP00000368767,9606.ENSP00000425824,9606.ENSP00000477999,9606.ENSP00000499717,9606.ENSP00000499797	CALM3,PRKACA,PLN,ASPH,CAMK2D,NOS1,CALM1,CALM2
GO:0060316	Positive regulation of ryanodine-sensitive calcium-release channel activity	3	9	0.99	0.35	0.0445	CALM3,CALM1,CALM2
GO:0060316	Positive regulation of ryanodine-sensitive calcium-release channel activity	4	9	1.03	0.51	0.0093	9606.ENSP00000291295,9606.ENSP00000368767,9606.ENSP00000499717,9606.ENSP00000499797	CALM3,ASPH,CALM1,CALM2
GO:0060324	Face development	11	52	0.79	0.86	9.53e-05	MAPK1,RRAS,RARA,PDGFRA,MAP2K2,MAPK3,EP300,MAP2K1,RAF1,BRAF,PTPN11
GO:0060324	Face development	14	52	0.81	1.1	3.75e-06	9606.ENSP00000215832,9606.ENSP00000221930,9606.ENSP00000246792,9606.ENSP00000254066,9606.ENSP00000257290,9606.ENSP00000262948,9606.ENSP00000263025,9606.ENSP00000263253,9606.ENSP00000302486,9606.ENSP00000315011,9606.ENSP00000368767,9606.ENSP00000401888,9606.ENSP00000419060,9606.ENSP00000489597	MAPK1,TGFB1,RRAS,RARA,PDGFRA,MAP2K2,MAPK3,EP300,MAP2K1,EDNRA,ASPH,RAF1,BRAF,PTPN11
GO:0060333	Interferon-gamma-mediated signaling pathway	4	12	0.99	0.47	0.0134	TP53,IFNGR1,JAK2,JAK1
GO:0060333	Interferon-gamma-mediated signaling pathway	6	12	1.08	0.81	0.00048	9606.ENSP00000269305,9606.ENSP00000354394,9606.ENSP00000356713,9606.ENSP00000365012,9606.ENSP00000371067,9606.ENSP00000499900	TP53,STAT1,IFNGR1,HCK,JAK2,JAK1
GO:0060334	Regulation of interferon-gamma-mediated signaling pathway	5	16	0.88	0.51	0.0083	9606.ENSP00000222005,9606.ENSP00000264316,9606.ENSP00000287820,9606.ENSP00000300651,9606.ENSP00000311857	CDC37,TXK,PPARG,MED1,PTPN2
GO:0060337	Type I interferon signaling pathway	11	42	0.8	0.89	7.11e-05	9606.ENSP00000315768,9606.ENSP00000329967,9606.ENSP00000354394,9606.ENSP00000358997,9606.ENSP00000376500,9606.ENSP00000380697,9606.ENSP00000401980,9606.ENSP00000431885,9606.ENSP00000464030,9606.ENSP00000498321,9606.ENSP00000499900	STAT2,TBK1,STAT1,IRAK1,TRAF3,IRF7,MAVS,TYK2,IKBKE,MYD88,JAK1
GO:0060340	Positive regulation of type I interferon-mediated signaling pathway	4	19	0.79	0.34	0.0446	TBK1,IRF7,MAVS,IRF3
GO:0060371	Regulation of atrial cardiac muscle cell membrane depolarization	3	8	0.96	0.34	0.0453	9606.ENSP00000328968,9606.ENSP00000352011,9606.ENSP00000396915	SCN5A,CACNA1G,SCN1B
GO:0060372	Regulation of atrial cardiac muscle cell membrane repolarization	3	7	1.1	0.4	0.0276	KCNQ1,CACNA1D,SCN5A
GO:0060372	Regulation of atrial cardiac muscle cell membrane repolarization	3	7	1.02	0.37	0.0352	9606.ENSP00000155840,9606.ENSP00000288139,9606.ENSP00000328968	KCNQ1,CACNA1D,SCN5A
GO:0060385	Axonogenesis involved in innervation	3	8	0.96	0.34	0.0453	9606.ENSP00000315011,9606.ENSP00000380227,9606.ENSP00000431418	EDNRA,ITGA4,NTRK1
GO:0060396	Growth hormone receptor signaling pathway	7	21	0.99	0.81	0.00037	PXN,PTK2,JAK2,PIK3R1,LYN,JAK3,JAK1
GO:0060396	Growth hormone receptor signaling pathway	9	21	1.02	1.07	2.10e-05	9606.ENSP00000264657,9606.ENSP00000300134,9606.ENSP00000341189,9606.ENSP00000371067,9606.ENSP00000428056,9606.ENSP00000428924,9606.ENSP00000431885,9606.ENSP00000432511,9606.ENSP00000499900	STAT3,STAT6,PTK2,JAK2,PIK3R1,LYN,TYK2,JAK3,JAK1
GO:0060397	Growth hormone receptor signaling pathway via JAK-STAT	4	10	1.07	0.52	0.0084	JAK2,LYN,JAK3,JAK1
GO:0060397	Growth hormone receptor signaling pathway via JAK-STAT	7	10	1.23	1.11	2.68e-05	9606.ENSP00000264657,9606.ENSP00000300134,9606.ENSP00000371067,9606.ENSP00000428924,9606.ENSP00000431885,9606.ENSP00000432511,9606.ENSP00000499900	STAT3,STAT6,JAK2,LYN,TYK2,JAK3,JAK1
GO:0060402	Calcium ion transport into cytosol	5	15	0.99	0.59	0.0041	TRPV5,CACNA1C,BAX,RYR2,SLC8A1
GO:0060402	Calcium ion transport into cytosol	8	15	1.11	1.1	2.26e-05	9606.ENSP00000265310,9606.ENSP00000266376,9606.ENSP00000293288,9606.ENSP00000355533,9606.ENSP00000363591,9606.ENSP00000369960,9606.ENSP00000381185,9606.ENSP00000384763	TRPV5,CACNA1C,BAX,RYR2,BAK1,ADRA1A,BCL2,SLC8A1
GO:0060416	Response to growth hormone	8	33	0.85	0.73	0.00065	PXN,PTK2,JAK2,PIK3R1,LYN,JAK3,AKT1,JAK1
GO:0060416	Response to growth hormone	11	33	0.91	1.07	1.16e-05	9606.ENSP00000264657,9606.ENSP00000300134,9606.ENSP00000341189,9606.ENSP00000364731,9606.ENSP00000371067,9606.ENSP00000428056,9606.ENSP00000428924,9606.ENSP00000431885,9606.ENSP00000432511,9606.ENSP00000451828,9606.ENSP00000499900	STAT3,STAT6,PTK2,F7,JAK2,PIK3R1,LYN,TYK2,JAK3,AKT1,JAK1
GO:0060438	Trachea development	5	19	0.88	0.5	0.0090	MAPK1,RARA,MAP2K2,MAPK3,MAP2K1
GO:0060438	Trachea development	6	19	0.88	0.6	0.0029	9606.ENSP00000215832,9606.ENSP00000254066,9606.ENSP00000262948,9606.ENSP00000263025,9606.ENSP00000302486,9606.ENSP00000495360	MAPK1,RARA,MAP2K2,MAPK3,MAP2K1,CTNNB1
GO:0060440	Trachea formation	4	7	1.22	0.63	0.0034	MAPK1,MAP2K2,MAPK3,MAP2K1
GO:0060440	Trachea formation	5	7	1.24	0.81	0.00060	9606.ENSP00000215832,9606.ENSP00000262948,9606.ENSP00000263025,9606.ENSP00000302486,9606.ENSP00000495360	MAPK1,MAP2K2,MAPK3,MAP2K1,CTNNB1
GO:0060443	Mammary gland morphogenesis	10	46	0.8	0.81	0.00019	NFKB1,NR3C1,BAX,MED1,PGR,BTRC,SRC,AR,ESR1,FGFR2
GO:0060444	Branching involved in mammary gland duct morphogenesis	6	22	0.9	0.61	0.0028	MED1,PGR,BTRC,SRC,AR,ESR1
GO:0060444	Branching involved in mammary gland duct morphogenesis	6	22	0.82	0.54	0.0052	9606.ENSP00000221930,9606.ENSP00000300651,9606.ENSP00000325120,9606.ENSP00000362680,9606.ENSP00000363822,9606.ENSP00000405330	TGFB1,MED1,PGR,SRC,AR,ESR1
GO:0060452	Positive regulation of cardiac muscle contraction	3	9	0.99	0.35	0.0445	KCNQ1,HSP90AA1,ACE2
GO:0060452	Positive regulation of cardiac muscle contraction	4	9	1.03	0.51	0.0093	9606.ENSP00000155840,9606.ENSP00000335153,9606.ENSP00000369960,9606.ENSP00000389326	KCNQ1,HSP90AA1,ADRA1A,ACE2
GO:0060509	Type I pneumocyte differentiation	4	8	1.16	0.59	0.0048	KRAS,THRA,THRB,CREB1
GO:0060509	Type I pneumocyte differentiation	4	8	1.08	0.54	0.0070	9606.ENSP00000256078,9606.ENSP00000264637,9606.ENSP00000379904,9606.ENSP00000387699	KRAS,THRA,THRB,CREB1
GO:0060603	Mammary gland duct morphogenesis	8	31	0.88	0.77	0.00046	NR3C1,MED1,PGR,BTRC,SRC,AR,ESR1,FGFR2
GO:0060674	Placenta blood vessel development	7	31	0.82	0.61	0.0024	MAPK1,ITGB8,MAP2K1,JUNB,FOSL1,VASH2,AKT1
GO:0060696	Regulation of phospholipid catabolic process	3	7	1.02	0.37	0.0352	9606.ENSP00000331602,9606.ENSP00000465356,9606.ENSP00000466775	PRKCD,APOC1,APOC2
GO:0060736	Prostate gland growth	4	12	0.99	0.47	0.0134	PTEN,AR,ESR1,FGFR2
GO:0060745	Mammary gland branching involved in pregnancy	4	6	1.29	0.68	0.0023	MED1,PGR,AR,ESR1
GO:0060745	Mammary gland branching involved in pregnancy	4	6	1.21	0.62	0.0035	9606.ENSP00000300651,9606.ENSP00000325120,9606.ENSP00000363822,9606.ENSP00000405330	MED1,PGR,AR,ESR1
GO:0060749	Mammary gland alveolus development	5	20	0.78	0.43	0.0172	9606.ENSP00000227507,9606.ENSP00000342235,9606.ENSP00000363822,9606.ENSP00000405330,9606.ENSP00000437955	CCND1,ERBB4,AR,ESR1,HIF1A
GO:0060751	Branch elongation involved in mammary gland duct branching	3	5	1.16	0.44	0.0192	9606.ENSP00000221930,9606.ENSP00000300651,9606.ENSP00000405330	TGFB1,MED1,ESR1
GO:0060753	Regulation of mast cell chemotaxis	3	7	1.02	0.37	0.0352	9606.ENSP00000249071,9606.ENSP00000311127,9606.ENSP00000451040	RAC2,VEGFB,PGF
GO:0060760	Positive regulation of response to cytokine stimulus	13	64	0.77	0.96	2.28e-05	RIPK2,TRAF2,RIPK1,TLR2,TXK,MED1,TBK1,TLR4,IRF7,IL1R1,MAVS,TICAM2,IRF3
GO:0060760	Positive regulation of response to cytokine stimulus	16	64	0.78	1.15	1.34e-06	9606.ENSP00000220751,9606.ENSP00000247668,9606.ENSP00000259808,9606.ENSP00000260010,9606.ENSP00000264316,9606.ENSP00000300651,9606.ENSP00000329967,9606.ENSP00000355865,9606.ENSP00000363089,9606.ENSP00000380697,9606.ENSP00000386380,9606.ENSP00000386884,9606.ENSP00000401980,9606.ENSP00000415139,9606.ENSP00000437955,9606.ENSP00000464030	RIPK2,TRAF2,RIPK1,TLR2,TXK,MED1,TBK1,PRKN,TLR4,IRF7,IL1R1,CXCR4,MAVS,TICAM2,HIF1A,IKBKE
GO:0060768	Regulation of epithelial cell proliferation involved in prostate gland development	4	10	0.99	0.48	0.0122	9606.ENSP00000228872,9606.ENSP00000363822,9606.ENSP00000370253,9606.ENSP00000495360	CDKN1B,AR,NKX3-1,CTNNB1
GO:0060907	Positive regulation of macrophage cytokine production	7	25	0.91	0.72	0.00086	RIPK2,TICAM1,MAPKAPK2,CARD9,TLR4,PLCG2,MYD88
GO:0060907	Positive regulation of macrophage cytokine production	7	25	0.83	0.63	0.0019	9606.ENSP00000220751,9606.ENSP00000248244,9606.ENSP00000356070,9606.ENSP00000360797,9606.ENSP00000363089,9606.ENSP00000482457,9606.ENSP00000498321	RIPK2,TICAM1,MAPKAPK2,CARD9,TLR4,PLCG2,MYD88
GO:0060964	Regulation of miRNA-mediated gene silencing	9	42	0.8	0.73	0.00052	RIPK1,MAP2K2,NCOR1,TP53,EGFR,PPARG,MAP2K1,PPP3CA,ESR1
GO:0060964	Regulation of miRNA-mediated gene silencing	12	42	0.84	1.02	1.44e-05	9606.ENSP00000221930,9606.ENSP00000259808,9606.ENSP00000262948,9606.ENSP00000264657,9606.ENSP00000268712,9606.ENSP00000269305,9606.ENSP00000275493,9606.ENSP00000287820,9606.ENSP00000302486,9606.ENSP00000378323,9606.ENSP00000398698,9606.ENSP00000405330	TGFB1,RIPK1,MAP2K2,STAT3,NCOR1,TP53,EGFR,PPARG,MAP2K1,PPP3CA,TNF,ESR1
GO:0060965	Negative regulation of miRNA-mediated gene silencing	5	20	0.86	0.48	0.0106	NCOR1,TP53,PPARG,PPP3CA,ESR1
GO:0060965	Negative regulation of miRNA-mediated gene silencing	8	20	0.99	0.92	0.00011	9606.ENSP00000221930,9606.ENSP00000264657,9606.ENSP00000268712,9606.ENSP00000269305,9606.ENSP00000287820,9606.ENSP00000378323,9606.ENSP00000398698,9606.ENSP00000405330	TGFB1,STAT3,NCOR1,TP53,PPARG,PPP3CA,TNF,ESR1
GO:0060999	Positive regulation of dendritic spine development	9	36	0.78	0.72	0.00057	9606.ENSP00000226730,9606.ENSP00000252486,9606.ENSP00000256460,9606.ENSP00000260386,9606.ENSP00000263026,9606.ENSP00000326366,9606.ENSP00000363553,9606.ENSP00000379098,9606.ENSP00000449381	IL2,APOE,CAMK1,ITPKA,EEF2K,PSEN1,LPAR1,CAMK2B,MAPKAPK5
GO:0061028	Establishment of endothelial barrier	8	33	0.85	0.73	0.00065	RAP1B,RAPGEF2,EZR,TJP1,AFDN,RAP1A,RAPGEF3,MYD88
GO:0061028	Establishment of endothelial barrier	10	33	0.87	0.92	6.42e-05	9606.ENSP00000250559,9606.ENSP00000315011,9606.ENSP00000338934,9606.ENSP00000353408,9606.ENSP00000358723,9606.ENSP00000366416,9606.ENSP00000384262,9606.ENSP00000395708,9606.ENSP00000496414,9606.ENSP00000498321	RAP1B,EDNRA,EZR,MSN,RAP1A,EDNRB,HPSE,RAPGEF3,RDX,MYD88
GO:0061029	Eyelid development in camera-type eye	4	13	0.95	0.45	0.0164	EGFR,JUN,HDAC1,SOS1
GO:0061041	Regulation of wound healing	33	130	0.79	1.89	2.86e-13	9606.ENSP00000223095,9606.ENSP00000226218,9606.ENSP00000233156,9606.ENSP00000234071,9606.ENSP00000252486,9606.ENSP00000257290,9606.ENSP00000260356,9606.ENSP00000262461,9606.ENSP00000278407,9606.ENSP00000280155,9606.ENSP00000297494,9606.ENSP00000300574,9606.ENSP00000306124,9606.ENSP00000308541,9606.ENSP00000311127,9606.ENSP00000321326,9606.ENSP00000331602,9606.ENSP00000332973,9606.ENSP00000341189,…	SERPINE1,VTN,TFPI,PROC,APOE,PDGFRA,THBS1,SLC12A2,SERPING1,ADRA2A,NOS3,CRK,PRKCE,F2,VEGFB,F2R,PRKCD,SMAD3,PTK2,MYLK,MTOR,SERPINC1,PTEN,PRKG1,F7,ITGB1,HPSE,F11,CXCR4,TBXA2R,TNF,HRAS,ACTG1
GO:0061043	Regulation of vascular wound healing	5	11	1.04	0.64	0.0025	9606.ENSP00000223095,9606.ENSP00000262461,9606.ENSP00000311127,9606.ENSP00000386884,9606.ENSP00000398698	SERPINE1,SLC12A2,VEGFB,CXCR4,TNF
GO:0061044	Negative regulation of vascular wound healing	3	5	1.16	0.44	0.0192	9606.ENSP00000223095,9606.ENSP00000262461,9606.ENSP00000398698	SERPINE1,SLC12A2,TNF
GO:0061045	Negative regulation of wound healing	17	69	0.78	1.19	6.69e-07	9606.ENSP00000223095,9606.ENSP00000226218,9606.ENSP00000233156,9606.ENSP00000234071,9606.ENSP00000252486,9606.ENSP00000257290,9606.ENSP00000262461,9606.ENSP00000278407,9606.ENSP00000297494,9606.ENSP00000300574,9606.ENSP00000308541,9606.ENSP00000331602,9606.ENSP00000332973,9606.ENSP00000361021,9606.ENSP00000363092,9606.ENSP00000384957,9606.ENSP00000398698	SERPINE1,VTN,TFPI,PROC,APOE,PDGFRA,SLC12A2,SERPING1,NOS3,CRK,F2,PRKCD,SMAD3,PTEN,PRKG1,F11,TNF
GO:0061049	Cell growth involved in cardiac muscle cell development	4	7	1.14	0.58	0.0050	9606.ENSP00000354718,9606.ENSP00000355627,9606.ENSP00000369960,9606.ENSP00000410402	AKAP13,AGT,ADRA1A,MAP2K4
GO:0061081	Positive regulation of myeloid leukocyte cytokine production involved in immune response	11	35	0.96	1.17	4.35e-06	RIPK2,TICAM1,KIT,MAPKAPK2,CARD9,TLR4,SYK,MAVS,PLCG2,BCL10,MYD88
GO:0061081	Positive regulation of myeloid leukocyte cytokine production involved in immune response	11	35	0.88	1.03	1.81e-05	9606.ENSP00000220751,9606.ENSP00000248244,9606.ENSP00000288135,9606.ENSP00000356070,9606.ENSP00000360797,9606.ENSP00000363089,9606.ENSP00000364898,9606.ENSP00000401980,9606.ENSP00000482457,9606.ENSP00000498104,9606.ENSP00000498321	RIPK2,TICAM1,KIT,MAPKAPK2,CARD9,TLR4,SYK,MAVS,PLCG2,BCL10,MYD88
GO:0061154	Endothelial tube morphogenesis	4	13	0.87	0.4	0.0237	9606.ENSP00000386884,9606.ENSP00000393978,9606.ENSP00000400175,9606.ENSP00000495360	CXCR4,PRKD2,RHOA,CTNNB1
GO:0061180	Mammary gland epithelium development	15	61	0.86	1.26	5.23e-07	MAPK1,CCND1,NR3C1,MED1,PGR,ERBB4,BTRC,SRC,AR,JAK2,AKT2,ESR1,FGFR2,AKT1,ORAI1
GO:0061180	Mammary gland epithelium development	16	61	0.8	1.2	7.89e-07	9606.ENSP00000215832,9606.ENSP00000221930,9606.ENSP00000227507,9606.ENSP00000231509,9606.ENSP00000300134,9606.ENSP00000300651,9606.ENSP00000325120,9606.ENSP00000342235,9606.ENSP00000362680,9606.ENSP00000363822,9606.ENSP00000371067,9606.ENSP00000375892,9606.ENSP00000405330,9606.ENSP00000437955,9606.ENSP00000451828,9606.ENSP00000482568	MAPK1,TGFB1,CCND1,NR3C1,STAT6,MED1,PGR,ERBB4,SRC,AR,JAK2,AKT2,ESR1,HIF1A,AKT1,ORAI1
GO:0061308	Cardiac neural crest cell development involved in heart development	5	12	1.0	0.61	0.0033	9606.ENSP00000215832,9606.ENSP00000263025,9606.ENSP00000315011,9606.ENSP00000444198,9606.ENSP00000497733	MAPK1,MAPK3,EDNRA,CITED2,CDC42
GO:0061337	Cardiac conduction	19	69	0.9	1.64	1.90e-09	KCNQ1,SLC9A1,KCNN2,CACNA1C,GJA1,CACNA1D,KCNJ3,PRKACA,SCN4B,SCN5A,PLN,RYR2,KCNE1,SLC8A1,CTNNA3,SCN1B,CAMK2D,KCNJ5,KCNE1B
GO:0061337	Cardiac conduction	18	69	0.8	1.3	1.41e-07	9606.ENSP00000155840,9606.ENSP00000263980,9606.ENSP00000264773,9606.ENSP00000266376,9606.ENSP00000288139,9606.ENSP00000295101,9606.ENSP00000309591,9606.ENSP00000322460,9606.ENSP00000328968,9606.ENSP00000350132,9606.ENSP00000352011,9606.ENSP00000355533,9606.ENSP00000382226,9606.ENSP00000384763,9606.ENSP00000396915,9606.ENSP00000425824,9606.ENSP00000433295,9606.ENSP00000477875	KCNQ1,SLC9A1,KCNN2,CACNA1C,CACNA1D,KCNJ3,PRKACA,SCN4B,SCN5A,PLN,CACNA1G,RYR2,KCNE1,SLC8A1,SCN1B,CAMK2D,KCNJ5,KCNE1B
GO:0061469	Regulation of type B pancreatic cell proliferation	4	15	0.89	0.4	0.0240	BIRC5,IRS2,PDX1,NR4A1
GO:0061469	Regulation of type B pancreatic cell proliferation	4	15	0.81	0.36	0.0347	9606.ENSP00000257904,9606.ENSP00000365016,9606.ENSP00000370421,9606.ENSP00000440864	CDK4,IRS2,PDX1,NR4A1
GO:0061520	Langerhans cell differentiation	3	4	1.26	0.49	0.0129	9606.ENSP00000221930,9606.ENSP00000222573,9606.ENSP00000283249	TGFB1,ITGB8,ITGB6
GO:0061900	Glial cell activation	15	37	0.99	1.59	2.08e-08	9606.ENSP00000243077,9606.ENSP00000260010,9606.ENSP00000284981,9606.ENSP00000326366,9606.ENSP00000353874,9606.ENSP00000356713,9606.ENSP00000360266,9606.ENSP00000363773,9606.ENSP00000371067,9606.ENSP00000380948,9606.ENSP00000389600,9606.ENSP00000398698,9606.ENSP00000459962,9606.ENSP00000496959,9606.ENSP00000500990	LRP1,TLR2,APP,PSEN1,TLR9,IFNGR1,JUN,C1QA,JAK2,ITGB2,TLR6,TNF,TRPV1,ITGAM,SNCA
GO:0062100	Positive regulation of programmed necrotic cell death	3	5	1.16	0.44	0.0192	9606.ENSP00000259808,9606.ENSP00000265164,9606.ENSP00000269305	RIPK1,CASP6,TP53
GO:0062208	Positive regulation of pattern recognition receptor signaling pathway	9	46	0.76	0.68	0.00092	TLR2,CYBA,TLR9,TLR1,TLR4,TIRAP,CD14,TICAM2,TLR5
GO:0070059	Intrinsic apoptotic signaling pathway in response to endoplasmic reticulum stress	7	34	0.78	0.57	0.0037	TRAF2,TP53,BAX,ATF4,MAP3K5,PDX1,DDIT3
GO:0070059	Intrinsic apoptotic signaling pathway in response to endoplasmic reticulum stress	11	34	0.89	1.05	1.46e-05	9606.ENSP00000247668,9606.ENSP00000269305,9606.ENSP00000293288,9606.ENSP00000306253,9606.ENSP00000336790,9606.ENSP00000351908,9606.ENSP00000363591,9606.ENSP00000370421,9606.ENSP00000381185,9606.ENSP00000415416,9606.ENSP00000448665	TRAF2,TP53,BAX,ITPR1,ATF4,MAP3K5,BAK1,PDX1,BCL2,TRIB3,DDIT3
GO:0070102	interleukin-6-mediated signaling pathway	4	14	0.92	0.42	0.0200	SRC,IL6ST,JAK2,JAK1
GO:0070102	interleukin-6-mediated signaling pathway	6	14	1.02	0.74	0.00088	9606.ENSP00000264657,9606.ENSP00000357470,9606.ENSP00000362680,9606.ENSP00000370698,9606.ENSP00000371067,9606.ENSP00000499900	STAT3,IL6R,SRC,IL6ST,JAK2,JAK1
GO:0070103	Regulation of interleukin-6-mediated signaling pathway	3	5	1.16	0.44	0.0192	9606.ENSP00000259808,9606.ENSP00000311857,9606.ENSP00000370698	RIPK1,PTPN2,IL6ST
GO:0070104	Negative regulation of interleukin-6-mediated signaling pathway	2	2	1.38	0.35	0.0489	9606.ENSP00000311857,9606.ENSP00000370698	PTPN2,IL6ST
GO:0070141	Response to UV-A	4	14	0.92	0.42	0.0200	CCND1,EGFR,MME,AKT1
GO:0070141	Response to UV-A	5	14	0.94	0.55	0.0054	9606.ENSP00000227507,9606.ENSP00000275493,9606.ENSP00000361405,9606.ENSP00000418525,9606.ENSP00000451828	CCND1,EGFR,MMP9,MME,AKT1
GO:0070227	Lymphocyte apoptotic process	8	34	0.84	0.71	0.00077	RIPK1,TP53,BAX,CRKL,ADA,FNIP1,AKT1,BCL10
GO:0070227	Lymphocyte apoptotic process	11	34	0.89	1.05	1.46e-05	9606.ENSP00000259808,9606.ENSP00000269305,9606.ENSP00000293288,9606.ENSP00000329213,9606.ENSP00000346300,9606.ENSP00000361965,9606.ENSP00000363591,9606.ENSP00000376943,9606.ENSP00000381185,9606.ENSP00000451828,9606.ENSP00000498104	RIPK1,TP53,BAX,SIVA1,CRKL,ADA,BAK1,BCL2L11,BCL2,AKT1,BCL10
GO:0070228	Regulation of lymphocyte apoptotic process	13	64	0.77	0.96	2.28e-05	IL2,PRKCQ,TP53,BAX,RORC,PTEN,ADA,IRS2,FNIP1,LYN,JAK3,BTK,BCL10
GO:0070228	Regulation of lymphocyte apoptotic process	16	64	0.78	1.15	1.34e-06	9606.ENSP00000226730,9606.ENSP00000263125,9606.ENSP00000269305,9606.ENSP00000293288,9606.ENSP00000327025,9606.ENSP00000361021,9606.ENSP00000361965,9606.ENSP00000365016,9606.ENSP00000376943,9606.ENSP00000381185,9606.ENSP00000393978,9606.ENSP00000428924,9606.ENSP00000432511,9606.ENSP00000437955,9606.ENSP00000483570,9606.ENSP00000498104	IL2,PRKCQ,TP53,BAX,RORC,PTEN,ADA,IRS2,BCL2L11,BCL2,PRKD2,LYN,JAK3,HIF1A,BTK,BCL10
GO:0070229	Negative regulation of lymphocyte apoptotic process	9	38	0.76	0.69	0.00079	9606.ENSP00000226730,9606.ENSP00000263125,9606.ENSP00000327025,9606.ENSP00000361965,9606.ENSP00000365016,9606.ENSP00000381185,9606.ENSP00000432511,9606.ENSP00000437955,9606.ENSP00000498104	IL2,PRKCQ,RORC,ADA,IRS2,BCL2,JAK3,HIF1A,BCL10
GO:0070231	T cell apoptotic process	6	29	0.78	0.49	0.0085	RIPK1,TP53,BAX,ADA,AKT1,BCL10
GO:0070231	T cell apoptotic process	10	29	0.92	1.02	2.65e-05	9606.ENSP00000259808,9606.ENSP00000269305,9606.ENSP00000293288,9606.ENSP00000329213,9606.ENSP00000361965,9606.ENSP00000363591,9606.ENSP00000376943,9606.ENSP00000381185,9606.ENSP00000451828,9606.ENSP00000498104	RIPK1,TP53,BAX,SIVA1,ADA,BAK1,BCL2L11,BCL2,AKT1,BCL10
GO:0070233	Negative regulation of T cell apoptotic process	6	25	0.76	0.49	0.0086	9606.ENSP00000263125,9606.ENSP00000327025,9606.ENSP00000361965,9606.ENSP00000381185,9606.ENSP00000432511,9606.ENSP00000437955	PRKCQ,RORC,ADA,BCL2,JAK3,HIF1A
GO:0070242	Thymocyte apoptotic process	5	11	1.04	0.64	0.0025	9606.ENSP00000269305,9606.ENSP00000293288,9606.ENSP00000361965,9606.ENSP00000363591,9606.ENSP00000376943	TP53,BAX,ADA,BAK1,BCL2L11
GO:0070243	Regulation of thymocyte apoptotic process	4	15	0.89	0.4	0.0240	TP53,RORC,ADA,JAK3
GO:0070243	Regulation of thymocyte apoptotic process	5	15	0.91	0.53	0.0068	9606.ENSP00000269305,9606.ENSP00000327025,9606.ENSP00000361965,9606.ENSP00000432511,9606.ENSP00000437955	TP53,RORC,ADA,JAK3,HIF1A
GO:0070244	Negative regulation of thymocyte apoptotic process	4	10	0.99	0.48	0.0122	9606.ENSP00000327025,9606.ENSP00000361965,9606.ENSP00000432511,9606.ENSP00000437955	RORC,ADA,JAK3,HIF1A
GO:0070252	Actin-mediated cell contraction	19	68	0.91	1.66	1.56e-09	KCNQ1,PIK3CA,SLC9A1,KCNN2,CACNA1C,GJA1,CACNA1D,KCNJ3,SCN4B,SCN5A,PARVA,RYR2,KCNE1,ROCK1,NEDD4L,SCN1B,CAMK2D,KCNJ5,KCNE1B
GO:0070252	Actin-mediated cell contraction	18	68	0.81	1.31	1.17e-07	9606.ENSP00000155840,9606.ENSP00000263967,9606.ENSP00000263980,9606.ENSP00000264773,9606.ENSP00000266376,9606.ENSP00000288139,9606.ENSP00000295101,9606.ENSP00000322460,9606.ENSP00000328968,9606.ENSP00000334008,9606.ENSP00000352011,9606.ENSP00000355533,9606.ENSP00000382226,9606.ENSP00000382697,9606.ENSP00000396915,9606.ENSP00000425824,9606.ENSP00000433295,9606.ENSP00000477875	KCNQ1,PIK3CA,SLC9A1,KCNN2,CACNA1C,CACNA1D,KCNJ3,SCN4B,SCN5A,PARVA,CACNA1G,RYR2,KCNE1,ROCK1,SCN1B,CAMK2D,KCNJ5,KCNE1B
GO:0070255	Regulation of mucus secretion	3	8	1.04	0.37	0.0357	CYBA,PRKCE,ADA
GO:0070255	Regulation of mucus secretion	3	8	0.96	0.34	0.0453	9606.ENSP00000261623,9606.ENSP00000306124,9606.ENSP00000361965	CYBA,PRKCE,ADA
GO:0070262	Peptidyl-serine dephosphorylation	5	11	1.12	0.7	0.0015	PPP2CB,DUSP1,PPP2R1A,PPP3CA,PPP2CA
GO:0070262	Peptidyl-serine dephosphorylation	6	11	1.12	0.84	0.00035	9606.ENSP00000012443,9606.ENSP00000221138,9606.ENSP00000239223,9606.ENSP00000324804,9606.ENSP00000378323,9606.ENSP00000418447	PPP5C,PPP2CB,DUSP1,PPP2R1A,PPP3CA,PPP2CA
GO:0070294	Renal sodium ion absorption	4	10	0.99	0.48	0.0122	9606.ENSP00000155840,9606.ENSP00000315011,9606.ENSP00000356832,9606.ENSP00000366416	KCNQ1,EDNRA,SGK1,EDNRB
GO:0070302	Regulation of stress-activated protein kinase signaling cascade	41	192	0.79	2.14	8.77e-17	GADD45B,MAPK1,RIPK2,DUSP3,DUSP1,TRAF2,GADD45G,RIPK1,TRAF5,MAP2K2,MAPK3,MECOM,NCOR1,EGFR,NCF1,DUSP16,CRK,MAP2K1,RASGRP1,EZR,DLG1,MAP3K5,TLR9,DUSP10,GADD45A,CARD9,NOX1,TLR4,IGBP1,AGER,FOXO1,TIRAP,TRAF3,PTK2B,MAP2K7,HRAS,MAP2K4,LYN,TRAF6,IGF1R,MYD88
GO:0070304	Positive regulation of stress-activated protein kinase signaling cascade	25	128	0.76	1.48	1.29e-09	GADD45B,RIPK2,TRAF2,GADD45G,RIPK1,TRAF5,NCF1,CRK,RASGRP1,MAP3K5,TLR9,GADD45A,CARD9,NOX1,TLR4,AGER,TIRAP,TRAF3,PTK2B,MAP2K7,HRAS,MAP2K4,LYN,TRAF6,MYD88
GO:0070340	Detection of bacterial lipopeptide	3	3	1.46	0.58	0.0064	TLR2,TLR1,TLR6
GO:0070340	Detection of bacterial lipopeptide	3	3	1.38	0.54	0.0082	9606.ENSP00000260010,9606.ENSP00000354932,9606.ENSP00000389600	TLR2,TLR1,TLR6
GO:0070371	ERK1 and ERK2 cascade	14	55	0.87	1.22	1.01e-06	MAPK1,RIPK2,ITGAV,MAP2K2,MAPK3,KDR,FLCN,MAP2K1,DUSP9,AGT,TLR4,CDK1,DUSP7,BRAF
GO:0070371	ERK1 and ERK2 cascade	14	55	0.79	1.05	6.41e-06	9606.ENSP00000215832,9606.ENSP00000220751,9606.ENSP00000261023,9606.ENSP00000262948,9606.ENSP00000263025,9606.ENSP00000263923,9606.ENSP00000302486,9606.ENSP00000345853,9606.ENSP00000355627,9606.ENSP00000363089,9606.ENSP00000369647,9606.ENSP00000379287,9606.ENSP00000417183,9606.ENSP00000419060	MAPK1,RIPK2,ITGAV,MAP2K2,MAPK3,KDR,MAP2K1,DUSP9,AGT,TLR4,AVP,YWHAZ,DUSP7,BRAF
GO:0070373	Negative regulation of ERK1 and ERK2 cascade	15	71	0.79	1.11	2.66e-06	DUSP3,PIN1,SLC9A3R1,RPS6KA6,PTPRR,FLCN,EZR,DLG1,DUSP9,TLR9,DUSP10,PTEN,TLR4,ACE2,LYN
GO:0070417	Cellular response to cold	4	12	0.99	0.47	0.0134	NFKBIA,SLC9A1,PRKACA,FOXO1
GO:0070417	Cellular response to cold	4	12	0.91	0.43	0.0192	9606.ENSP00000216797,9606.ENSP00000263980,9606.ENSP00000309591,9606.ENSP00000368880	NFKBIA,SLC9A1,PRKACA,FOXO1
GO:0070423	Nucleotide-binding oligomerization domain containing signaling pathway	6	14	1.1	0.82	0.00044	NFKBIA,RIPK2,MAP3K7,TLR4,RELA,MAP2K6
GO:0070423	Nucleotide-binding oligomerization domain containing signaling pathway	6	14	1.02	0.74	0.00088	9606.ENSP00000216797,9606.ENSP00000220751,9606.ENSP00000358335,9606.ENSP00000363089,9606.ENSP00000384273,9606.ENSP00000468348	NFKBIA,RIPK2,MAP3K7,TLR4,RELA,MAP2K6
GO:0070427	Nucleotide-binding oligomerization domain containing 1 signaling pathway	3	3	1.46	0.58	0.0064	NFKBIA,RIPK2,TLR4
GO:0070427	Nucleotide-binding oligomerization domain containing 1 signaling pathway	3	3	1.38	0.54	0.0082	9606.ENSP00000216797,9606.ENSP00000220751,9606.ENSP00000363089	NFKBIA,RIPK2,TLR4
GO:0070431	Nucleotide-binding oligomerization domain containing 2 signaling pathway	4	9	1.11	0.56	0.0064	NFKBIA,RIPK2,TLR4,RELA
GO:0070431	Nucleotide-binding oligomerization domain containing 2 signaling pathway	4	9	1.03	0.51	0.0093	9606.ENSP00000216797,9606.ENSP00000220751,9606.ENSP00000363089,9606.ENSP00000384273	NFKBIA,RIPK2,TLR4,RELA
GO:0070489	T cell aggregation	2	2	1.38	0.35	0.0489	9606.ENSP00000264972,9606.ENSP00000353408	ZAP70,MSN
GO:0070498	interleukin-1-mediated signaling pathway	12	20	1.24	1.88	5.61e-09	IRAK2,MAPK3,RPS6KA4,MAP3K7,IRAK1,RELA,IL1R1,IKBKB,TRAF6,RPS6KA5,IRAK4,MYD88
GO:0070498	interleukin-1-mediated signaling pathway	12	20	1.16	1.68	3.24e-08	9606.ENSP00000256458,9606.ENSP00000263025,9606.ENSP00000333896,9606.ENSP00000358335,9606.ENSP00000358997,9606.ENSP00000384273,9606.ENSP00000386380,9606.ENSP00000430684,9606.ENSP00000433623,9606.ENSP00000479667,9606.ENSP00000479889,9606.ENSP00000498321	IRAK2,MAPK3,RPS6KA4,MAP3K7,IRAK1,RELA,IL1R1,IKBKB,TRAF6,RPS6KA5,IRAK4,MYD88
GO:0070509	Calcium ion import	6	19	0.88	0.6	0.0029	9606.ENSP00000288139,9606.ENSP00000334198,9606.ENSP00000352011,9606.ENSP00000384763,9606.ENSP00000385019,9606.ENSP00000482568	CACNA1D,CACNA1H,CACNA1G,SLC8A1,CACNA1I,ORAI1
GO:0070527	Platelet aggregation	11	43	0.87	1.01	2.16e-05	VCL,PDGFRA,TLN1,FN1,ILK,PTPN6,PIK3CG,ITGB3,ACTG1,ACTB,PIK3CB
GO:0070527	Platelet aggregation	11	43	0.79	0.87	8.52e-05	9606.ENSP00000222271,9606.ENSP00000257290,9606.ENSP00000316029,9606.ENSP00000346839,9606.ENSP00000379975,9606.ENSP00000391592,9606.ENSP00000419260,9606.ENSP00000452786,9606.ENSP00000458162,9606.ENSP00000494750,9606.ENSP00000501150	COMP,PDGFRA,TLN1,FN1,ILK,PTPN6,PIK3CG,ITGB3,ACTG1,ACTB,PIK3CB
GO:0070661	Leukocyte proliferation	29	146	0.76	1.65	2.88e-11	RIPK2,IL2,FLT3,TICAM1,RAC2,PRKCQ,TP53,ERBB2,KIT,BAX,JUNB,RASGRP1,CD19,CD28,TBK1,PRKCD,HSPD1,DLG1,FYN,PTEN,ADA,TLR4,BCL2L1,PTPN6,PIK3CG,RASSF5,BTK,MALT1,CBLB
GO:0070661	Leukocyte proliferation	36	146	0.78	1.93	3.96e-14	9606.ENSP00000220751,9606.ENSP00000221930,9606.ENSP00000226730,9606.ENSP00000228534,9606.ENSP00000231228,9606.ENSP00000241453,9606.ENSP00000248244,9606.ENSP00000249071,9606.ENSP00000263125,9606.ENSP00000269305,9606.ENSP00000269571,9606.ENSP00000288135,9606.ENSP00000293288,9606.ENSP00000303315,9606.ENSP00000313419,9606.ENSP00000324890,9606.ENSP00000329967,9606.ENSP00000331602,9606.ENSP00000340019,…	RIPK2,TGFB1,IL2,IL23A,IL12B,FLT3,TICAM1,RAC2,PRKCQ,TP53,ERBB2,KIT,BAX,JUNB,CD19,CD28,TBK1,PRKCD,HSPD1,DLG1,FYN,MSN,CR2,PTEN,ADA,CCND3,TLR4,BCL2L1,PPP3CB,BCL2,PTPN6,PIK3CG,RASSF5,BTK,MALT1,CBLB
GO:0070665	Positive regulation of leukocyte proliferation	41	167	0.77	2.06	5.17e-16	9606.ENSP00000215832,9606.ENSP00000220751,9606.ENSP00000226730,9606.ENSP00000228534,9606.ENSP00000231228,9606.ENSP00000248244,9606.ENSP00000249071,9606.ENSP00000262345,9606.ENSP00000263025,9606.ENSP00000263125,9606.ENSP00000264972,9606.ENSP00000288135,9606.ENSP00000294728,9606.ENSP00000303231,9606.ENSP00000313875,9606.ENSP00000315477,9606.ENSP00000321345,9606.ENSP00000324890,9606.ENSP00000341189,…	MAPK1,RIPK2,IL2,IL23A,IL12B,TICAM1,RAC2,IL12RB2,MAPK3,PRKCQ,ZAP70,KIT,VCAM1,IL12A,CD46,CD209,IL23R,CD28,PTK2,TLR9,VAV3,ADA,TLR4,SYK,IRS2,BCL2L1,IL6ST,JAK2,TIRAP,PPP3CA,NFATC2,HLA-A,BCL2,CDKN1A,LYN,TYK2,JAK3,TRAF6,IL12RB1,BTK,MYD88
GO:0070666	Regulation of mast cell proliferation	4	8	1.08	0.54	0.0070	9606.ENSP00000249071,9606.ENSP00000288135,9606.ENSP00000300134,9606.ENSP00000428924	RAC2,KIT,STAT6,LYN
GO:0070668	Positive regulation of mast cell proliferation	3	4	1.34	0.52	0.0102	RAC2,KIT,LYN
GO:0070668	Positive regulation of mast cell proliferation	3	4	1.26	0.49	0.0129	9606.ENSP00000249071,9606.ENSP00000288135,9606.ENSP00000428924	RAC2,KIT,LYN
GO:0070671	Response to interleukin-12	4	7	1.14	0.58	0.0050	9606.ENSP00000220751,9606.ENSP00000355361,9606.ENSP00000371067,9606.ENSP00000470788	RIPK2,CD47,JAK2,IL12RB1
GO:0070849	Response to epidermal growth factor	12	46	0.88	1.1	6.57e-06	MAPK1,DUSP3,PLCG1,MAPK3,IQGAP1,ERBB2,EGFR,MED1,ERBB4,PDPK1,AKT1,PTPN11
GO:0070849	Response to epidermal growth factor	12	46	0.8	0.95	2.99e-05	9606.ENSP00000215832,9606.ENSP00000226004,9606.ENSP00000244007,9606.ENSP00000263025,9606.ENSP00000268182,9606.ENSP00000269571,9606.ENSP00000275493,9606.ENSP00000300651,9606.ENSP00000342235,9606.ENSP00000344220,9606.ENSP00000451828,9606.ENSP00000489597	MAPK1,DUSP3,PLCG1,MAPK3,IQGAP1,ERBB2,EGFR,MED1,ERBB4,PDPK1,AKT1,PTPN11
GO:0070884	Regulation of calcineurin-NFAT signaling cascade	12	42	0.84	1.02	1.44e-05	9606.ENSP00000263980,9606.ENSP00000267101,9606.ENSP00000324806,9606.ENSP00000350310,9606.ENSP00000354558,9606.ENSP00000378207,9606.ENSP00000378306,9606.ENSP00000378323,9606.ENSP00000380878,9606.ENSP00000398698,9606.ENSP00000482457,9606.ENSP00000498330	SLC9A1,ERBB3,GSK3B,ATP2B4,MTOR,AKAP5,PPP3CB,PPP3CA,PPP3CC,TNF,PLCG2,PPP3R2
GO:0070886	Positive regulation of calcineurin-NFAT signaling cascade	8	23	0.93	0.84	0.00023	9606.ENSP00000263980,9606.ENSP00000267101,9606.ENSP00000378207,9606.ENSP00000378306,9606.ENSP00000378323,9606.ENSP00000380878,9606.ENSP00000398698,9606.ENSP00000498330	SLC9A1,ERBB3,AKAP5,PPP3CB,PPP3CA,PPP3CC,TNF,PPP3R2
GO:0070979	Protein K11-linked ubiquitination	12	30	1.07	1.48	1.71e-07	ANAPC5,ANAPC2,ANAPC1,CDC16,UBE2C,CDC26,CDC23,ANAPC7,ANAPC13,ANAPC4,CDC27,ANAPC10
GO:0070997	Neuron death	28	102	0.82	1.83	5.39e-12	9606.ENSP00000172229,9606.ENSP00000256078,9606.ENSP00000263980,9606.ENSP00000264033,9606.ENSP00000264110,9606.ENSP00000264867,9606.ENSP00000267101,9606.ENSP00000269305,9606.ENSP00000284981,9606.ENSP00000293288,9606.ENSP00000318822,9606.ENSP00000324173,9606.ENSP00000326366,9606.ENSP00000330237,9606.ENSP00000349156,9606.ENSP00000351490,9606.ENSP00000360973,9606.ENSP00000365230,9606.ENSP00000375892,…	NGFR,KRAS,SLC9A1,CBL,ATF2,PPARGC1A,ERBB3,TP53,APP,BAX,BID,HSPA5,PSEN1,CASP9,SIAH1,MAX,AGTR2,BCL2L1,AKT2,THRB,BCL2,ROCK1,RHOA,HRAS,NTRK1,HIF1A,NEFL,SNCA
GO:0071216	Cellular response to biotic stimulus	54	232	0.75	2.24	3.63e-20	9606.ENSP00000215832,9606.ENSP00000216797,9606.ENSP00000220751,9606.ENSP00000221930,9606.ENSP00000223095,9606.ENSP00000226574,9606.ENSP00000229795,9606.ENSP00000231228,9606.ENSP00000248244,9606.ENSP00000254066,9606.ENSP00000256458,9606.ENSP00000257904,9606.ENSP00000260010,9606.ENSP00000263025,9606.ENSP00000269305,9606.ENSP00000284818,9606.ENSP00000296026,9606.ENSP00000297494,9606.ENSP00000306124,…	MAPK1,NFKBIA,RIPK2,TGFB1,SERPINE1,NFKB1,MAPK14,IL12B,TICAM1,RARA,IRAK2,CDK4,TLR2,MAPK3,TP53,LY96,CXCL3,NOS3,PRKCE,NFKBIB,HSPA5,GSK3B,NOS2,MAP2K3,TLR9,TLR1,IRAK1,SRC,TLR4,SYK,HCK,EDNRB,JAK2,TIRAP,BCL2L11,MAPK8,MAP2K7,RELA,CD14,TLR6,TBXA2R,TNF,RHOA,TICAM2,LYN,TRAF6,DDIT3,AKT1,PLCG2,BTK,TLR5,MALT1,BCL10,MYD88
GO:0071219	Cellular response to molecule of bacterial origin	40	205	0.75	1.94	3.10e-15	MAPK1,NFKBIA,RIPK2,NFKB1,MAPK14,TICAM1,RARA,IRAK2,TLR2,MAPK3,LY96,CAPN2,CXCL3,NOS3,PRKCE,NFKBIB,MAP2K3,TLR9,TLR1,IRAK1,SRC,TLR4,JAK2,TIRAP,MAPK8,MAP2K7,RELA,CD14,TLR6,RHOA,TICAM2,LYN,TRAF6,AKT1,IRF3,PLCG2,TLR5,MALT1,BCL10,MYD88
GO:0071221	Cellular response to bacterial lipopeptide	5	6	1.39	0.93	0.00022	TLR2,TLR1,TIRAP,CD14,TLR6
GO:0071221	Cellular response to bacterial lipopeptide	5	6	1.3	0.86	0.00039	9606.ENSP00000260010,9606.ENSP00000354932,9606.ENSP00000376445,9606.ENSP00000385519,9606.ENSP00000389600	TLR2,TLR1,TIRAP,CD14,TLR6
GO:0071223	Cellular response to lipoteichoic acid	7	11	1.27	1.17	1.72e-05	RIPK2,MAPK14,TLR2,TLR4,TIRAP,RELA,CD14
GO:0071223	Cellular response to lipoteichoic acid	7	11	1.19	1.06	4.09e-05	9606.ENSP00000220751,9606.ENSP00000229795,9606.ENSP00000260010,9606.ENSP00000363089,9606.ENSP00000376445,9606.ENSP00000384273,9606.ENSP00000385519	RIPK2,MAPK14,TLR2,TLR4,TIRAP,RELA,CD14
GO:0071229	Cellular response to acid chemical	22	83	0.89	1.77	1.27e-10	SESN2,LAMTOR5,PDGFRA,CYBA,RRAGB,PIK3CA,EGFR,LAMTOR1,CAPN2,RPTOR,LAMTOR4,FYN,MTOR,LAMTOR2,RRAGD,RRAGC,BCL2L1,CYBB,RRAGA,SLC38A9,CASTOR1,LAMTOR3
GO:0071230	Cellular response to amino acid stimulus	21	76	0.91	1.77	1.98e-10	SESN2,LAMTOR5,PDGFRA,CYBA,RRAGB,EGFR,LAMTOR1,CAPN2,RPTOR,LAMTOR4,FYN,MTOR,LAMTOR2,RRAGD,RRAGC,BCL2L1,CYBB,RRAGA,SLC38A9,CASTOR1,LAMTOR3
GO:0071233	Cellular response to leucine	4	11	1.03	0.5	0.0107	SESN2,RPTOR,MTOR,RRAGD
GO:0071236	Cellular response to antibiotic	5	14	1.02	0.62	0.0032	CDKN1B,MDM2,SLC9A1,TP53,PLA2G4F
GO:0071236	Cellular response to antibiotic	6	14	1.02	0.74	0.00088	9606.ENSP00000228872,9606.ENSP00000258149,9606.ENSP00000263980,9606.ENSP00000269305,9606.ENSP00000324173,9606.ENSP00000380442	CDKN1B,MDM2,SLC9A1,TP53,HSPA5,PLA2G4F
GO:0071243	Cellular response to arsenic-containing substance	5	20	0.86	0.48	0.0106	MAPK13,MKNK2,DAXX,ATF4,CPEB2
GO:0071257	Cellular response to electrical stimulus	4	13	0.87	0.4	0.0237	9606.ENSP00000263980,9606.ENSP00000282753,9606.ENSP00000320866,9606.ENSP00000361021	SLC9A1,GRM1,CALR,PTEN
GO:0071260	Cellular response to mechanical stimulus	18	75	0.84	1.41	3.52e-08	NFKB1,CYBA,MAPK3,SLC9A1,ITGA2,AGT,GADD45A,TLR4,BAD,MAPK8,MAP3K1,MAP2K4,ITGB3,MAP3K14,TLR5,IGF1R,BCL10,MYD88
GO:0071260	Cellular response to mechanical stimulus	20	75	0.81	1.43	1.69e-08	9606.ENSP00000162749,9606.ENSP00000221930,9606.ENSP00000226574,9606.ENSP00000261623,9606.ENSP00000263025,9606.ENSP00000263980,9606.ENSP00000296585,9606.ENSP00000355627,9606.ENSP00000363089,9606.ENSP00000363591,9606.ENSP00000378040,9606.ENSP00000378974,9606.ENSP00000382423,9606.ENSP00000410402,9606.ENSP00000452786,9606.ENSP00000482657,9606.ENSP00000496355,9606.ENSP00000497069,9606.ENSP00000498104,…	TNFRSF1A,TGFB1,NFKB1,CYBA,MAPK3,SLC9A1,ITGA2,AGT,TLR4,BAK1,BAD,MAPK8,MAP3K1,MAP2K4,ITGB3,MAP3K14,TLR5,IGF1R,BCL10,MYD88
GO:0071276	Cellular response to cadmium ion	12	36	0.99	1.32	7.94e-07	MAPK1,MAPK3,DAXX,EGFR,NCF1,FOS,CHUK,JUN,CYBB,MAPK8,MAPK9,AKT1
GO:0071276	Cellular response to cadmium ion	11	36	0.87	1.01	2.24e-05	9606.ENSP00000215832,9606.ENSP00000263025,9606.ENSP00000266000,9606.ENSP00000275493,9606.ENSP00000306245,9606.ENSP00000359424,9606.ENSP00000360266,9606.ENSP00000361405,9606.ENSP00000378974,9606.ENSP00000394560,9606.ENSP00000451828	MAPK1,MAPK3,DAXX,EGFR,FOS,CHUK,JUN,MMP9,MAPK8,MAPK9,AKT1
GO:0071277	Cellular response to calcium ion	17	89	0.75	1.11	1.47e-06	FOSB,JUND,ITPKA,EEF2K,IQGAP1,ADCY8,ADCY1,JUNB,FOS,SCN5A,RASGRP2,PRKAA1,JUN,PRKAA2,BRAF,CAMK2D,PLCG2
GO:0071287	Cellular response to manganese ion	5	12	1.0	0.61	0.0033	9606.ENSP00000284981,9606.ENSP00000324173,9606.ENSP00000336790,9606.ENSP00000355865,9606.ENSP00000370571	APP,HSPA5,ATF4,PRKN,TH
GO:0071312	Cellular response to alkaloid	8	37	0.8	0.67	0.0012	PPP1R1B,ADCY8,CACNA1S,RYR2,BCL2L1,SLC8A1,TRPV1,CCNA2
GO:0071312	Cellular response to alkaloid	11	37	0.86	0.99	2.74e-05	9606.ENSP00000254079,9606.ENSP00000265164,9606.ENSP00000286355,9606.ENSP00000352608,9606.ENSP00000355192,9606.ENSP00000355533,9606.ENSP00000365230,9606.ENSP00000370571,9606.ENSP00000384763,9606.ENSP00000459962,9606.ENSP00000489262	PPP1R1B,CASP6,ADCY8,RYR1,CACNA1S,RYR2,BCL2L1,TH,SLC8A1,TRPV1,RYR3
GO:0071313	Cellular response to caffeine	5	11	1.04	0.64	0.0025	9606.ENSP00000352608,9606.ENSP00000355192,9606.ENSP00000355533,9606.ENSP00000384763,9606.ENSP00000489262	RYR1,CACNA1S,RYR2,SLC8A1,RYR3
GO:0071316	Cellular response to nicotine	4	7	1.22	0.63	0.0034	NFKB1,BAD,RELA,NTRK1
GO:0071316	Cellular response to nicotine	6	7	1.32	1.05	6.24e-05	9606.ENSP00000226574,9606.ENSP00000370571,9606.ENSP00000378040,9606.ENSP00000384273,9606.ENSP00000398698,9606.ENSP00000431418	NFKB1,TH,BAD,RELA,TNF,NTRK1
GO:0071320	Cellular response to cAMP	13	55	0.84	1.09	5.76e-06	KCNQ1,AHR,RAP1B,EEF2K,RAPGEF2,EZR,SLC26A3,RAP1A,ITPR2,KCNE1,SLC8A1,RAPGEF3,PIK3CG
GO:0071320	Cellular response to cAMP	14	55	0.79	1.05	6.41e-06	9606.ENSP00000155840,9606.ENSP00000242057,9606.ENSP00000250559,9606.ENSP00000263026,9606.ENSP00000284981,9606.ENSP00000324173,9606.ENSP00000338934,9606.ENSP00000345873,9606.ENSP00000358723,9606.ENSP00000370744,9606.ENSP00000382226,9606.ENSP00000384763,9606.ENSP00000395708,9606.ENSP00000419260	KCNQ1,AHR,RAP1B,EEF2K,APP,HSPA5,EZR,SLC26A3,RAP1A,ITPR2,KCNE1,SLC8A1,RAPGEF3,PIK3CG
GO:0071322	Cellular response to carbohydrate stimulus	21	88	0.84	1.57	1.87e-09	MAPK13,CYBA,NOX4,PIK3CA,ADCY8,PRKACA,FOXO3,MAP2K3,PRKAA1,TJP1,PRKAA2,AGER,IRS2,PPP3CA,MAP2K7,RAF1,MAP2K4,RPS6KA2,MAP2K6,PRKCB,IGF1R
GO:0071333	Cellular response to glucose stimulus	14	73	0.75	0.96	1.71e-05	CYBA,NOX4,PIK3CA,ADCY8,PRKACA,FOXO3,PRKAA1,TJP1,PRKAA2,AGER,IRS2,PPP3CA,RAF1,IGF1R
GO:0071349	Cellular response to interleukin-12	3	6	1.08	0.4	0.0263	9606.ENSP00000355361,9606.ENSP00000371067,9606.ENSP00000470788	CD47,JAK2,IL12RB1
GO:0071354	Cellular response to interleukin-6	6	29	0.78	0.49	0.0085	NFKB1,SRC,IL6ST,JAK2,RELA,JAK1
GO:0071354	Cellular response to interleukin-6	8	29	0.82	0.71	0.00079	9606.ENSP00000226574,9606.ENSP00000264657,9606.ENSP00000357470,9606.ENSP00000362680,9606.ENSP00000370698,9606.ENSP00000371067,9606.ENSP00000384273,9606.ENSP00000499900	NFKB1,STAT3,IL6R,SRC,IL6ST,JAK2,RELA,JAK1
GO:0071361	Cellular response to ethanol	5	14	1.02	0.62	0.0032	KCNMB1,PRKCE,PRKAA1,CYBB,ITPR2
GO:0071361	Cellular response to ethanol	4	14	0.84	0.38	0.0287	9606.ENSP00000274629,9606.ENSP00000306124,9606.ENSP00000346148,9606.ENSP00000370744	KCNMB1,PRKCE,PRKAA1,ITPR2
GO:0071364	Cellular response to epidermal growth factor stimulus	10	42	0.84	0.88	0.00010	DUSP3,PLCG1,IQGAP1,ERBB2,EGFR,MED1,ERBB4,PDPK1,AKT1,PTPN11
GO:0071364	Cellular response to epidermal growth factor stimulus	10	42	0.76	0.76	0.00034	9606.ENSP00000226004,9606.ENSP00000244007,9606.ENSP00000268182,9606.ENSP00000269571,9606.ENSP00000275493,9606.ENSP00000300651,9606.ENSP00000342235,9606.ENSP00000344220,9606.ENSP00000451828,9606.ENSP00000489597	DUSP3,PLCG1,IQGAP1,ERBB2,EGFR,MED1,ERBB4,PDPK1,AKT1,PTPN11
GO:0071375	Cellular response to peptide hormone stimulus	49	240	0.77	2.24	2.31e-19	PIK3R2,RPS6KB1,NFKB1,CYBA,PIK3R3,GAB1,EEF2K,PIK3CA,SLC9A1,PIK3C2A,RB1,PXN,ADCY8,PPARG,PRKCI,CRK,INSR,IRS1,FOS,SP1,PRKCD,PTK2,PDPK1,MAX,AGT,RAB13,IRS4,EIF4EBP2,SRC,FOXO4,IRS2,PRKCZ,FOXO1,JAK2,AKT2,GRB2,RELA,SHC1,PIK3R1,LYN,JAK3,NR4A1,CPEB2,AKT1,ITGB3,CCNA2,IGF1R,JAK1,CAMK2A
GO:0071375	Cellular response to peptide hormone stimulus	61	240	0.79	2.57	1.65e-24	9606.ENSP00000221930,9606.ENSP00000222254,9606.ENSP00000222330,9606.ENSP00000225577,9606.ENSP00000226413,9606.ENSP00000226574,9606.ENSP00000257430,9606.ENSP00000257904,9606.ENSP00000261623,9606.ENSP00000262741,9606.ENSP00000262995,9606.ENSP00000263026,9606.ENSP00000263967,9606.ENSP00000263980,9606.ENSP00000264657,9606.ENSP00000282096,9606.ENSP00000286355,9606.ENSP00000287820,9606.ENSP00000293549,…	TGFB1,PIK3R2,GSK3A,RPS6KB1,GNRHR,NFKB1,APC,CDK4,CYBA,PIK3R3,GAB1,EEF2K,PIK3CA,SLC9A1,STAT3,PDE3B,ADCY8,PPARG,WNT1,PRKCI,STAT6,CRK,INSR,IRS1,FOS,PTPN2,EDNRA,GSK3B,SP1,PRKCD,PTK2,PDPK1,MAX,STAT1,AGT,RAB13,AGTR2,IRS4,EIF4EBP2,SRC,FOXO4,IRS2,TBC1D4,PRKCZ,FOXO1,JAK2,AKT2,RELA,AGTR1,SHC1,TRIB3,PIK3R1,LYN,TYK2,JAK3,NR4A1,AKT1,ITGB3,IGF1R,JAK1,CAMK2A
GO:0071379	Cellular response to prostaglandin stimulus	7	22	0.89	0.7	0.0010	9606.ENSP00000233242,9606.ENSP00000287820,9606.ENSP00000306124,9606.ENSP00000334448,9606.ENSP00000346148,9606.ENSP00000360290,9606.ENSP00000451828	APOB,PPARG,PRKCE,GNG2,PRKAA1,PRKAA2,AKT1
GO:0071380	Cellular response to prostaglandin E stimulus	5	17	0.93	0.54	0.0063	PPARG,PRKCE,PRKAA1,PRKAA2,AKT1
GO:0071380	Cellular response to prostaglandin E stimulus	6	17	0.93	0.65	0.0019	9606.ENSP00000287820,9606.ENSP00000306124,9606.ENSP00000334448,9606.ENSP00000346148,9606.ENSP00000360290,9606.ENSP00000451828	PPARG,PRKCE,GNG2,PRKAA1,PRKAA2,AKT1
GO:0071392	Cellular response to estradiol stimulus	9	40	0.82	0.76	0.00038	KIF18A,EGFR,ITGA2,NRIP1,ESR2,NCOA3,ESR1,CCNA2,IGF1R
GO:0071394	Cellular response to testosterone stimulus	4	9	1.11	0.56	0.0064	ROCK2,AR,ELK1,IGF1R
GO:0071394	Cellular response to testosterone stimulus	6	9	1.21	0.94	0.00016	9606.ENSP00000317985,9606.ENSP00000353408,9606.ENSP00000363822,9606.ENSP00000366182,9606.ENSP00000378517,9606.ENSP00000497069	ROCK2,MSN,AR,ELK1,SPP1,IGF1R
GO:0071402	Cellular response to lipoprotein particle stimulus	10	31	0.97	1.1	1.18e-05	TICAM1,PPARG,FCER1G,TLR4,SYK,ITGB1,ITGB2,TLR6,AKT1,MYD88
GO:0071402	Cellular response to lipoprotein particle stimulus	10	31	0.89	0.97	4.18e-05	9606.ENSP00000248244,9606.ENSP00000287820,9606.ENSP00000289902,9606.ENSP00000363089,9606.ENSP00000364898,9606.ENSP00000379350,9606.ENSP00000380948,9606.ENSP00000389600,9606.ENSP00000451828,9606.ENSP00000498321	TICAM1,PPARG,FCER1G,TLR4,SYK,ITGB1,ITGB2,TLR6,AKT1,MYD88
GO:0071404	Cellular response to low-density lipoprotein particle stimulus	5	18	0.91	0.52	0.0075	PPARG,FCER1G,SYK,ITGB1,ITGB2
GO:0071404	Cellular response to low-density lipoprotein particle stimulus	5	18	0.83	0.46	0.0122	9606.ENSP00000287820,9606.ENSP00000289902,9606.ENSP00000364898,9606.ENSP00000379350,9606.ENSP00000380948	PPARG,FCER1G,SYK,ITGB1,ITGB2
GO:0071417	Cellular response to organonitrogen compound	113	574	0.76	2.93	9.27e-45	KCNQ1,NGFR,MAPK13,MAPK1,RIPK2,PIK3R2,RPS6KB1,NFKB1,AHR,RAP1B,SESN2,PPP1R1B,LAMTOR5,PDGFRA,MDM2,CYBA,SLC9A3R1,PIK3R3,RRAGB,GAB1,MAPK3,EEF2K,PIK3CA,SLC9A1,ATF2,RAPGEF2,PIK3C2A,RB1,PXN,TP53,EGFR,LAMTOR1,GJA1,ADCY8,PPARG,CAPN2,PRKCI,LRRK2,CRK,INSR,CTNNA1,IRS1,FOS,RPTOR,PRKACA,SP1,PRKCD,ATF4,EZR,FOXO3,PTK2,LAMTOR4,PDPK1,SLC26A3,PRKAA1,FYN,ATP2B4,MAX,TLR9,MTOR,ARHGEF2,CACNA1S,RYR2,AGT,LAMTOR2,RAB13,RRA…
GO:0071447	Cellular response to hydroperoxide	3	8	0.96	0.34	0.0453	9606.ENSP00000331602,9606.ENSP00000386135,9606.ENSP00000390535	PRKCD,DAPK1,PRKD1
GO:0071453	Cellular response to oxygen levels	31	152	0.77	1.76	2.78e-12	JUND,MDM2,EEF2K,SLC9A1,CBL,ATF2,TP53,KCNMB1,PPARG,PRKCE,FOS,RPTOR,ATF4,FOXO3,PRKAA1,MTOR,MDM4,IRAK1,PTEN,NOX1,SRC,CYBB,FOXO1,SLC8A3,BAD,SLC8A1,KCNK2,CPEB2,AKT1,MLST8,CCNA2
GO:0071455	Cellular response to hyperoxia	3	6	1.16	0.44	0.0206	PPARG,NOX1,FOXO1
GO:0071456	Cellular response to hypoxia	25	128	0.76	1.48	1.29e-09	JUND,MDM2,SLC9A1,ATF2,TP53,KCNMB1,PPARG,PRKCE,FOS,RPTOR,FOXO3,PRKAA1,MTOR,MDM4,IRAK1,PTEN,SRC,CYBB,SLC8A3,BAD,SLC8A1,KCNK2,CPEB2,MLST8,CCNA2
GO:0071468	Cellular response to acidic pH	4	17	0.84	0.37	0.0336	SLC9A1,NOX1,KCNE1,TRPV1
GO:0071480	Cellular response to gamma radiation	6	29	0.78	0.49	0.0085	MDM2,CYBA,TP53,BCL2L1,ELK1,HRAS
GO:0071480	Cellular response to gamma radiation	8	29	0.82	0.71	0.00079	9606.ENSP00000258149,9606.ENSP00000261623,9606.ENSP00000269305,9606.ENSP00000324173,9606.ENSP00000365230,9606.ENSP00000366182,9606.ENSP00000384849,9606.ENSP00000407586	MDM2,CYBA,TP53,HSPA5,BCL2L1,ELK1,CDKN1A,HRAS
GO:0071496	Cellular response to external stimulus	71	317	0.81	2.85	2.02e-30	MAPK1,NFKB1,ITFG2,NPRL2,SESN2,PRKAB2,CYBA,WDR59,RRAGB,MAPK3,SLC9A1,CBL,ATF2,MAPKAP1,TP53,FLCN,PPARG,PRKAG2,WDR24,ITGA2,LRRK2,SIK2,FOS,RPTOR,FOSL1,C12orf66,RNF152,PRKAG1,ULK1,ATF4,KPTN,FOXO3,MIOS,PRKAA1,MAX,TFEB,MAP3K5,MTOR,AGT,PIK3C2B,RRAGD,GADD45A,PRKAA2,RRAGC,TLR4,FOXO1,RRAGA,BAD,MAPK8,ITGA4,MAP3K1,SEH1L,PRR5,NCOA1,PPARA,ATP2B1,PRKAG3,MAP2K4,FNIP1,LYN,PRKAB1,ITGB3,SZT2,MLST8,MAP3K14,NPRL3,TLR5,…
GO:0071593	Lymphocyte aggregation	4	5	1.29	0.67	0.0023	9606.ENSP00000249071,9606.ENSP00000264972,9606.ENSP00000353408,9606.ENSP00000383376	RAC2,ZAP70,MSN,JAM2
GO:0071634	Regulation of transforming growth factor beta production	10	39	0.79	0.81	0.00020	9606.ENSP00000222573,9606.ENSP00000260356,9606.ENSP00000261023,9606.ENSP00000264110,9606.ENSP00000283249,9606.ENSP00000313875,9606.ENSP00000332973,9606.ENSP00000346839,9606.ENSP00000360609,9606.ENSP00000437955	ITGB8,THBS1,ITGAV,ATF2,ITGB6,CD46,SMAD3,FN1,HSP90AB1,HIF1A
GO:0071670	Smooth muscle cell chemotaxis	2	2	1.46	0.36	0.0445	PDGFRB,PARVA
GO:0071670	Smooth muscle cell chemotaxis	2	2	1.38	0.35	0.0489	9606.ENSP00000261799,9606.ENSP00000334008	PDGFRB,PARVA
GO:0071726	Cellular response to diacyl bacterial lipopeptide	3	4	1.34	0.52	0.0102	TLR2,CD14,TLR6
GO:0071726	Cellular response to diacyl bacterial lipopeptide	3	4	1.26	0.49	0.0129	9606.ENSP00000260010,9606.ENSP00000385519,9606.ENSP00000389600	TLR2,CD14,TLR6
GO:0071727	Cellular response to triacyl bacterial lipopeptide	3	3	1.46	0.58	0.0064	TLR2,TLR1,CD14
GO:0071727	Cellular response to triacyl bacterial lipopeptide	3	3	1.38	0.54	0.0082	9606.ENSP00000260010,9606.ENSP00000354932,9606.ENSP00000385519	TLR2,TLR1,CD14
GO:0071732	Cellular response to nitric oxide	5	17	0.93	0.54	0.0063	TRAF2,CDK2,CRK,FOXO1,CCNA2
GO:0071732	Cellular response to nitric oxide	4	17	0.76	0.33	0.0473	9606.ENSP00000247668,9606.ENSP00000266970,9606.ENSP00000300574,9606.ENSP00000368880	TRAF2,CDK2,CRK,FOXO1
GO:0071801	Regulation of podosome assembly	6	14	1.02	0.74	0.00088	9606.ENSP00000353408,9606.ENSP00000362680,9606.ENSP00000365012,9606.ENSP00000394560,9606.ENSP00000398698,9606.ENSP00000400175	MSN,SRC,HCK,MAPK9,TNF,RHOA
GO:0071803	Positive regulation of podosome assembly	5	11	1.04	0.64	0.0025	9606.ENSP00000353408,9606.ENSP00000362680,9606.ENSP00000394560,9606.ENSP00000398698,9606.ENSP00000400175	MSN,SRC,MAPK9,TNF,RHOA
GO:0071827	Plasma lipoprotein particle organization	13	42	0.87	1.16	2.68e-06	9606.ENSP00000233242,9606.ENSP00000252486,9606.ENSP00000261407,9606.ENSP00000264005,9606.ENSP00000274793,9606.ENSP00000309591,9606.ENSP00000355627,9606.ENSP00000359719,9606.ENSP00000366488,9606.ENSP00000398832,9606.ENSP00000445002,9606.ENSP00000465356,9606.ENSP00000466775	APOB,APOE,LPCAT3,LCAT,PLA2G7,PRKACA,AGT,PRKACB,PRKACG,AGTR1,APOA5,APOC1,APOC2
GO:0071872	Cellular response to epinephrine stimulus	5	12	1.08	0.67	0.0020	KCNQ1,SLC9A1,PRKACA,ATP2B4,RYR2
GO:0071872	Cellular response to epinephrine stimulus	6	12	1.08	0.81	0.00048	9606.ENSP00000155840,9606.ENSP00000263980,9606.ENSP00000309591,9606.ENSP00000350310,9606.ENSP00000355533,9606.ENSP00000500990	KCNQ1,SLC9A1,PRKACA,ATP2B4,RYR2,SNCA
GO:0071875	Adrenergic receptor signaling pathway	10	25	0.99	1.12	9.72e-06	9606.ENSP00000155840,9606.ENSP00000280155,9606.ENSP00000294016,9606.ENSP00000306662,9606.ENSP00000350132,9606.ENSP00000354718,9606.ENSP00000368766,9606.ENSP00000369960,9606.ENSP00000386069,9606.ENSP00000480573	KCNQ1,ADRA2A,ADCY9,ADRA1B,PLN,AKAP13,ADRA1D,ADRA1A,ADRA2C,ADRA2B
GO:0071880	Adenylate cyclase-activating adrenergic receptor signaling pathway	9	22	1.0	1.04	2.77e-05	9606.ENSP00000280155,9606.ENSP00000294016,9606.ENSP00000306662,9606.ENSP00000350132,9606.ENSP00000354718,9606.ENSP00000368766,9606.ENSP00000369960,9606.ENSP00000386069,9606.ENSP00000480573	ADRA2A,ADCY9,ADRA1B,PLN,AKAP13,ADRA1D,ADRA1A,ADRA2C,ADRA2B
GO:0071887	Leukocyte apoptotic process	10	45	0.81	0.83	0.00017	RIPK1,TP53,BAX,CRKL,ADA,BCL2L1,FNIP1,AKT1,IRF3,BCL10
GO:0071887	Leukocyte apoptotic process	13	45	0.84	1.1	4.97e-06	9606.ENSP00000259808,9606.ENSP00000269305,9606.ENSP00000293288,9606.ENSP00000329213,9606.ENSP00000330237,9606.ENSP00000346300,9606.ENSP00000361965,9606.ENSP00000363591,9606.ENSP00000365230,9606.ENSP00000376943,9606.ENSP00000381185,9606.ENSP00000451828,9606.ENSP00000498104	RIPK1,TP53,BAX,SIVA1,CASP9,CRKL,ADA,BAK1,BCL2L1,BCL2L11,BCL2,AKT1,BCL10
GO:0071900	Regulation of protein serine/threonine kinase activity	93	386	0.85	3.34	1.42e-42	TAB1,CCND1,CDKN1B,SLC8A2,DUSP1,FLT3,TRAF2,SESN2,PPP1R1B,CCNB1,CAMK1,SPDYE1,PDGFRB,PKMYT1,TELO2,MAP2K2,NOX4,RAPGEF2,PRKAR2A,PRKAR2B,RB1,IQGAP1,ERBB2,EGFR,PPARG,PRKAG2,KIT,CCNB2,CALM3,DUSP16,LRRK2,PLK1,MAP2K1,CDC25A,INSR,RPTOR,RASGRP1,CKS1B,CDC25C,PRKAG1,SPDYE3,PRKCD,SPDYA,SFN,ATP2B4,MAP3K5,TLR9,AGT,DUSP10,MAP3K7,IRAK1,GADD45A,PTEN,SRC,TLR4,AGER,SYK,CKS2,CCNB3,SLC8A3,PKIA,PTK2B,MAP2K7,SOS1,SLC8A1,P…
GO:0071900	Regulation of protein serine/threonine kinase activity	90	386	0.75	2.73	4.66e-34	9606.ENSP00000216160,9606.ENSP00000221930,9606.ENSP00000222005,9606.ENSP00000227507,9606.ENSP00000228872,9606.ENSP00000236877,9606.ENSP00000239223,9606.ENSP00000241453,9606.ENSP00000247668,9606.ENSP00000252486,9606.ENSP00000254079,9606.ENSP00000256460,9606.ENSP00000257430,9606.ENSP00000260356,9606.ENSP00000261254,9606.ENSP00000261799,9606.ENSP00000262948,9606.ENSP00000265563,9606.ENSP00000265717,…	TAB1,TGFB1,CDC37,CCND1,CDKN1B,SLC8A2,DUSP1,FLT3,TRAF2,APOE,PPP1R1B,CAMK1,APC,THBS1,CCND2,PDGFRB,MAP2K2,PRKAR2A,PRKAR2B,IQGAP1,ERBB2,EGFR,ADRA2A,FLT1,APP,PPARG,PRKAG2,KIT,CALM3,DUSP16,MAP2K1,INSR,RPTOR,CDC25C,PRKAG1,PSEN1,PRKCD,SFN,TCL1B,ATP2B4,MAP3K5,TLR9,AKAP13,AGT,DUSP10,MAP3K7,MTCP1,IRAK1,HSP90AB1,PTEN,STK4,CCND3,SRC,TLR4,SYK,SLC8A3,PKIA,PTK2B,MAP2K7,KSR1,SLC8A1,CDKN1A,PRKAR1B,RGS14,TLR6,PTPN6…
GO:0071901	Negative regulation of protein serine/threonine kinase activity	25	113	0.81	1.65	1.34e-10	CDKN1B,DUSP1,PPP1R1B,PRKAR2A,PRKAR2B,RB1,PPARG,PRKAG2,DUSP16,PLK1,PRKCD,AGT,DUSP10,GADD45A,PTEN,SLC8A3,PKIA,SLC8A1,PRKAR1B,PTPN6,DUSP7,CDKN2A,LYN,AKT1,PIK3CB
GO:0071901	Negative regulation of protein serine/threonine kinase activity	26	113	0.75	1.49	9.52e-10	9606.ENSP00000228872,9606.ENSP00000239223,9606.ENSP00000252486,9606.ENSP00000254079,9606.ENSP00000257430,9606.ENSP00000265563,9606.ENSP00000265717,9606.ENSP00000287820,9606.ENSP00000287878,9606.ENSP00000298573,9606.ENSP00000331602,9606.ENSP00000355627,9606.ENSP00000355866,9606.ENSP00000361021,9606.ENSP00000370669,9606.ENSP00000379696,9606.ENSP00000384763,9606.ENSP00000384849,9606.ENSP00000385749,…	CDKN1B,DUSP1,APOE,PPP1R1B,APC,PRKAR2A,PRKAR2B,PPARG,PRKAG2,DUSP16,PRKCD,AGT,DUSP10,PTEN,SLC8A3,PKIA,SLC8A1,CDKN1A,PRKAR1B,RGS14,PTPN6,DUSP7,CDKN2A,LYN,AKT1,PIK3CB
GO:0071902	Positive regulation of protein serine/threonine kinase activity	58	226	0.87	2.97	2.82e-27	TAB1,CCND1,CDKN1B,SLC8A2,FLT3,TRAF2,CCNB1,CAMK1,SPDYE1,PDGFRB,TELO2,MAP2K2,NOX4,RAPGEF2,IQGAP1,ERBB2,EGFR,KIT,CALM3,LRRK2,MAP2K1,INSR,RPTOR,RASGRP1,CKS1B,SPDYE3,SPDYA,ATP2B4,MAP3K5,TLR9,MAP3K7,IRAK1,SRC,TLR4,AGER,SYK,CKS2,PTK2B,MAP2K7,TLR6,PIK3R5,FGFR1,RHOA,HRAS,PPP2CA,PIK3CG,SPDYE2,SPDYE2B,TRAF6,AKT1,MLST8,MAP2K6,PIK3R6,SPDYE6,SPDYE5,SPDYE16,CALM1,CALM2
GO:0071902	Positive regulation of protein serine/threonine kinase activity	57	226	0.79	2.47	9.80e-23	9606.ENSP00000216160,9606.ENSP00000221930,9606.ENSP00000227507,9606.ENSP00000228872,9606.ENSP00000236877,9606.ENSP00000241453,9606.ENSP00000247668,9606.ENSP00000256460,9606.ENSP00000260356,9606.ENSP00000261254,9606.ENSP00000261799,9606.ENSP00000262948,9606.ENSP00000268182,9606.ENSP00000269571,9606.ENSP00000275493,9606.ENSP00000280155,9606.ENSP00000282397,9606.ENSP00000284981,9606.ENSP00000288135,…	TAB1,TGFB1,CCND1,CDKN1B,SLC8A2,FLT3,TRAF2,CAMK1,THBS1,CCND2,PDGFRB,MAP2K2,IQGAP1,ERBB2,EGFR,ADRA2A,FLT1,APP,KIT,CALM3,MAP2K1,INSR,RPTOR,PSEN1,TCL1B,ATP2B4,MAP3K5,TLR9,AKAP13,MAP3K7,MTCP1,IRAK1,HSP90AB1,STK4,CCND3,SRC,TLR4,SYK,PTK2B,MAP2K7,TLR6,PIK3R5,FGFR1,TNF,RHOA,HRAS,PPP2CA,PIK3CG,TRAF6,TCL1A,AKT1,MLST8,MAP2K6,PIK3R6,CALM1,CALM2,SNCA
GO:0072376	Protein activation cascade	9	26	0.92	0.93	7.73e-05	9606.ENSP00000218099,9606.ENSP00000308541,9606.ENSP00000346839,9606.ENSP00000356771,9606.ENSP00000364709,9606.ENSP00000364731,9606.ENSP00000377055,9606.ENSP00000384262,9606.ENSP00000384957	F9,F2,FN1,F5,F10,F7,PRCP,HPSE,F11
GO:0072377	Blood coagulation, common pathway	3	5	1.16	0.44	0.0192	9606.ENSP00000308541,9606.ENSP00000356771,9606.ENSP00000364709	F2,F5,F10
GO:0072378	Blood coagulation, fibrin clot formation	7	24	0.85	0.66	0.0015	9606.ENSP00000218099,9606.ENSP00000308541,9606.ENSP00000346839,9606.ENSP00000356771,9606.ENSP00000364709,9606.ENSP00000364731,9606.ENSP00000384957	F9,F2,FN1,F5,F10,F7,F11
GO:0072678	T cell migration	8	35	0.82	0.7	0.00090	SLC12A2,ZAP70,ITGB7,CRK,CRKL,ITGAL,PIK3CD,PIK3CG
GO:0072678	T cell migration	9	35	0.79	0.74	0.00048	9606.ENSP00000262461,9606.ENSP00000264972,9606.ENSP00000267082,9606.ENSP00000300574,9606.ENSP00000346300,9606.ENSP00000349252,9606.ENSP00000353408,9606.ENSP00000366563,9606.ENSP00000419260	SLC12A2,ZAP70,ITGB7,CRK,CRKL,ITGAL,MSN,PIK3CD,PIK3CG
GO:0072683	T cell extravasation	3	8	1.04	0.37	0.0357	CRK,CRKL,ITGAL
GO:0072683	T cell extravasation	3	8	0.96	0.34	0.0453	9606.ENSP00000300574,9606.ENSP00000346300,9606.ENSP00000349252	CRK,CRKL,ITGAL
GO:0072709	Cellular response to sorbitol	5	5	1.46	1.0	0.00013	MAPK13,MAP2K3,MAP2K7,MAP2K4,MAP2K6
GO:0072709	Cellular response to sorbitol	5	5	1.38	0.92	0.00023	9606.ENSP00000211287,9606.ENSP00000345083,9606.ENSP00000381070,9606.ENSP00000410402,9606.ENSP00000468348	MAPK13,MAP2K3,MAP2K7,MAP2K4,MAP2K6
GO:0072740	Cellular response to anisomycin	3	3	1.46	0.58	0.0064	MAPK13,ATF2,JUN
GO:0072740	Cellular response to anisomycin	3	3	1.38	0.54	0.0082	9606.ENSP00000211287,9606.ENSP00000264110,9606.ENSP00000360266	MAPK13,ATF2,JUN
GO:0086001	Cardiac muscle cell action potential	15	49	0.95	1.49	5.01e-08	KCNQ1,KCNN2,CACNA1C,GJA1,CACNA1D,KCNJ3,SCN4B,SCN5A,RYR2,KCNE1,NEDD4L,SLC8A1,SCN1B,KCNJ5,KCNE1B
GO:0086001	Cardiac muscle cell action potential	14	49	0.84	1.16	2.11e-06	9606.ENSP00000155840,9606.ENSP00000264773,9606.ENSP00000266376,9606.ENSP00000288139,9606.ENSP00000295101,9606.ENSP00000322460,9606.ENSP00000328968,9606.ENSP00000352011,9606.ENSP00000355533,9606.ENSP00000382226,9606.ENSP00000384763,9606.ENSP00000396915,9606.ENSP00000433295,9606.ENSP00000477875	KCNQ1,KCNN2,CACNA1C,CACNA1D,KCNJ3,SCN4B,SCN5A,CACNA1G,RYR2,KCNE1,SLC8A1,SCN1B,KCNJ5,KCNE1B
GO:0086002	Cardiac muscle cell action potential involved in contraction	14	38	1.03	1.6	2.49e-08	KCNQ1,KCNN2,CACNA1C,GJA1,CACNA1D,KCNJ3,SCN4B,SCN5A,RYR2,KCNE1,NEDD4L,SCN1B,KCNJ5,KCNE1B
GO:0086002	Cardiac muscle cell action potential involved in contraction	13	38	0.92	1.26	1.07e-06	9606.ENSP00000155840,9606.ENSP00000264773,9606.ENSP00000266376,9606.ENSP00000288139,9606.ENSP00000295101,9606.ENSP00000322460,9606.ENSP00000328968,9606.ENSP00000352011,9606.ENSP00000355533,9606.ENSP00000382226,9606.ENSP00000396915,9606.ENSP00000433295,9606.ENSP00000477875	KCNQ1,KCNN2,CACNA1C,CACNA1D,KCNJ3,SCN4B,SCN5A,CACNA1G,RYR2,KCNE1,SCN1B,KCNJ5,KCNE1B
GO:0086003	Cardiac muscle cell contraction	17	44	1.05	1.93	2.66e-10	KCNQ1,PIK3CA,SLC9A1,KCNN2,CACNA1C,GJA1,CACNA1D,KCNJ3,SCN4B,SCN5A,RYR2,KCNE1,NEDD4L,SCN1B,CAMK2D,KCNJ5,KCNE1B
GO:0086003	Cardiac muscle cell contraction	16	44	0.94	1.54	2.08e-08	9606.ENSP00000155840,9606.ENSP00000263967,9606.ENSP00000263980,9606.ENSP00000264773,9606.ENSP00000266376,9606.ENSP00000288139,9606.ENSP00000295101,9606.ENSP00000322460,9606.ENSP00000328968,9606.ENSP00000352011,9606.ENSP00000355533,9606.ENSP00000382226,9606.ENSP00000396915,9606.ENSP00000425824,9606.ENSP00000433295,9606.ENSP00000477875	KCNQ1,PIK3CA,SLC9A1,KCNN2,CACNA1C,CACNA1D,KCNJ3,SCN4B,SCN5A,CACNA1G,RYR2,KCNE1,SCN1B,CAMK2D,KCNJ5,KCNE1B
GO:0086004	Regulation of cardiac muscle cell contraction	7	33	0.79	0.58	0.0032	CACNA1C,SCN5A,DLG1,PLN,RYR2,CTNNA3,CAMK2D
GO:0086005	Ventricular cardiac muscle cell action potential	8	22	1.03	0.98	6.66e-05	KCNQ1,KCNJ3,SCN5A,RYR2,KCNE1,NEDD4L,KCNJ5,KCNE1B
GO:0086005	Ventricular cardiac muscle cell action potential	7	22	0.89	0.7	0.0010	9606.ENSP00000155840,9606.ENSP00000295101,9606.ENSP00000328968,9606.ENSP00000355533,9606.ENSP00000382226,9606.ENSP00000433295,9606.ENSP00000477875	KCNQ1,KCNJ3,SCN5A,RYR2,KCNE1,KCNJ5,KCNE1B
GO:0086010	Membrane depolarization during action potential	8	30	0.89	0.79	0.00038	YWHAH,CACNA1C,CACNA1D,SCN4B,SCN5A,SLC8A1,SCN1B,SCN7A
GO:0086010	Membrane depolarization during action potential	10	30	0.91	0.99	3.33e-05	9606.ENSP00000266376,9606.ENSP00000288139,9606.ENSP00000322460,9606.ENSP00000328968,9606.ENSP00000334198,9606.ENSP00000352011,9606.ENSP00000384763,9606.ENSP00000385019,9606.ENSP00000396915,9606.ENSP00000496114	CACNA1C,CACNA1D,SCN4B,SCN5A,CACNA1H,CACNA1G,SLC8A1,CACNA1I,SCN1B,SCN7A
GO:0086012	Membrane depolarization during cardiac muscle cell action potential	6	17	1.01	0.73	0.00098	CACNA1C,CACNA1D,SCN4B,SCN5A,SLC8A1,SCN1B
GO:0086012	Membrane depolarization during cardiac muscle cell action potential	7	17	1.0	0.83	0.00031	9606.ENSP00000266376,9606.ENSP00000288139,9606.ENSP00000322460,9606.ENSP00000328968,9606.ENSP00000352011,9606.ENSP00000384763,9606.ENSP00000396915	CACNA1C,CACNA1D,SCN4B,SCN5A,CACNA1G,SLC8A1,SCN1B
GO:0086013	Membrane repolarization during cardiac muscle cell action potential	6	20	0.94	0.65	0.0019	KCNQ1,KCNN2,KCNJ3,KCNE1,KCNJ5,KCNE1B
GO:0086013	Membrane repolarization during cardiac muscle cell action potential	6	20	0.86	0.58	0.0036	9606.ENSP00000155840,9606.ENSP00000264773,9606.ENSP00000295101,9606.ENSP00000382226,9606.ENSP00000433295,9606.ENSP00000477875	KCNQ1,KCNN2,KCNJ3,KCNE1,KCNJ5,KCNE1B
GO:0086014	Atrial cardiac muscle cell action potential	7	14	1.16	1.04	5.22e-05	KCNQ1,KCNN2,CACNA1C,GJA1,KCNJ3,SCN5A,KCNJ5
GO:0086014	Atrial cardiac muscle cell action potential	6	14	1.02	0.74	0.00088	9606.ENSP00000155840,9606.ENSP00000264773,9606.ENSP00000266376,9606.ENSP00000295101,9606.ENSP00000328968,9606.ENSP00000433295	KCNQ1,KCNN2,CACNA1C,KCNJ3,SCN5A,KCNJ5
GO:0086016	AV node cell action potential	3	7	1.1	0.4	0.0276	CACNA1C,SCN4B,SCN5A
GO:0086016	AV node cell action potential	4	7	1.14	0.58	0.0050	9606.ENSP00000266376,9606.ENSP00000322460,9606.ENSP00000328968,9606.ENSP00000352011	CACNA1C,SCN4B,SCN5A,CACNA1G
GO:0086019	Cell-cell signaling involved in cardiac conduction	11	27	1.07	1.39	5.66e-07	KCNQ1,KCNN2,CACNA1C,GJA1,CACNA1D,KCNJ3,SCN4B,SCN5A,RYR2,SCN1B,KCNJ5
GO:0086019	Cell-cell signaling involved in cardiac conduction	11	27	0.99	1.23	2.55e-06	9606.ENSP00000155840,9606.ENSP00000264773,9606.ENSP00000266376,9606.ENSP00000288139,9606.ENSP00000295101,9606.ENSP00000322460,9606.ENSP00000328968,9606.ENSP00000352011,9606.ENSP00000355533,9606.ENSP00000396915,9606.ENSP00000433295	KCNQ1,KCNN2,CACNA1C,CACNA1D,KCNJ3,SCN4B,SCN5A,CACNA1G,RYR2,SCN1B,KCNJ5
GO:0086029	Purkinje myocyte to ventricular cardiac muscle cell signaling	3	5	1.24	0.47	0.0148	SCN5A,RYR2,SCN1B
GO:0086029	Purkinje myocyte to ventricular cardiac muscle cell signaling	3	5	1.16	0.44	0.0192	9606.ENSP00000328968,9606.ENSP00000355533,9606.ENSP00000396915	SCN5A,RYR2,SCN1B
GO:0086036	Regulation of cardiac muscle cell membrane potential	3	7	1.1	0.4	0.0276	SLC9A1,PLN,FXYD1
GO:0086036	Regulation of cardiac muscle cell membrane potential	3	7	1.02	0.37	0.0352	9606.ENSP00000263980,9606.ENSP00000350132,9606.ENSP00000481244	SLC9A1,PLN,FXYD1
GO:0086045	Membrane depolarization during AV node cell action potential	3	5	1.16	0.44	0.0192	9606.ENSP00000266376,9606.ENSP00000328968,9606.ENSP00000352011	CACNA1C,SCN5A,CACNA1G
GO:0086046	Membrane depolarization during SA node cell action potential	3	5	1.16	0.44	0.0192	9606.ENSP00000288139,9606.ENSP00000328968,9606.ENSP00000352011	CACNA1D,SCN5A,CACNA1G
GO:0086064	Cell communication by electrical coupling involved in cardiac conduction	5	15	0.99	0.59	0.0041	CACNA1C,GJA1,PRKACA,RYR2,SLC8A1
GO:0086064	Cell communication by electrical coupling involved in cardiac conduction	4	15	0.81	0.36	0.0347	9606.ENSP00000266376,9606.ENSP00000309591,9606.ENSP00000355533,9606.ENSP00000384763	CACNA1C,PRKACA,RYR2,SLC8A1
GO:0086065	Cell communication involved in cardiac conduction	14	43	0.98	1.47	8.72e-08	KCNQ1,KCNN2,CACNA1C,GJA1,CACNA1D,KCNJ3,PRKACA,SCN4B,SCN5A,RYR2,SLC8A1,CTNNA3,SCN1B,KCNJ5
GO:0086065	Cell communication involved in cardiac conduction	13	43	0.86	1.14	3.31e-06	9606.ENSP00000155840,9606.ENSP00000264773,9606.ENSP00000266376,9606.ENSP00000288139,9606.ENSP00000295101,9606.ENSP00000309591,9606.ENSP00000322460,9606.ENSP00000328968,9606.ENSP00000352011,9606.ENSP00000355533,9606.ENSP00000384763,9606.ENSP00000396915,9606.ENSP00000433295	KCNQ1,KCNN2,CACNA1C,CACNA1D,KCNJ3,PRKACA,SCN4B,SCN5A,CACNA1G,RYR2,SLC8A1,SCN1B,KCNJ5
GO:0086091	Regulation of heart rate by cardiac conduction	12	42	0.92	1.18	2.99e-06	KCNQ1,CACNA1C,CACNA1D,KCNJ3,SCN4B,SCN5A,KCNE1,CTNNA3,SCN1B,CAMK2D,KCNJ5,KCNE1B
GO:0086091	Regulation of heart rate by cardiac conduction	12	42	0.84	1.02	1.44e-05	9606.ENSP00000155840,9606.ENSP00000266376,9606.ENSP00000288139,9606.ENSP00000295101,9606.ENSP00000322460,9606.ENSP00000328968,9606.ENSP00000352011,9606.ENSP00000382226,9606.ENSP00000396915,9606.ENSP00000425824,9606.ENSP00000433295,9606.ENSP00000477875	KCNQ1,CACNA1C,CACNA1D,KCNJ3,SCN4B,SCN5A,CACNA1G,KCNE1,SCN1B,CAMK2D,KCNJ5,KCNE1B
GO:0086092	Regulation of the force of heart contraction by cardiac conduction	2	2	1.46	0.36	0.0445	SLC9A1,PLN
GO:0086092	Regulation of the force of heart contraction by cardiac conduction	2	2	1.38	0.35	0.0489	9606.ENSP00000263980,9606.ENSP00000350132	SLC9A1,PLN
GO:0086100	Endothelin receptor signaling pathway	6	10	1.16	0.89	0.00024	9606.ENSP00000078429,9606.ENSP00000315011,9606.ENSP00000346300,9606.ENSP00000366416,9606.ENSP00000380638,9606.ENSP00000497733	GNA11,EDNRA,CRKL,EDNRB,PTK2B,CDC42
GO:0086103	G protein-coupled receptor signaling pathway involved in heart process	5	11	1.04	0.64	0.0025	9606.ENSP00000315011,9606.ENSP00000350132,9606.ENSP00000354718,9606.ENSP00000362680,9606.ENSP00000497733	EDNRA,PLN,AKAP13,SRC,CDC42
GO:0089700	Protein kinase D signaling	3	3	1.38	0.54	0.0082	9606.ENSP00000368356,9606.ENSP00000390535,9606.ENSP00000393978	PRKD3,PRKD1,PRKD2
GO:0090043	Regulation of tubulin deacetylation	4	19	0.79	0.34	0.0446	EP300,MAPT,PRKAA1,PRKAA2
GO:0090045	Positive regulation of deacetylase activity	3	8	1.04	0.37	0.0357	LRRK2,CREB3,MAPK8
GO:0090045	Positive regulation of deacetylase activity	4	8	1.08	0.54	0.0070	9606.ENSP00000342136,9606.ENSP00000378974,9606.ENSP00000390535,9606.ENSP00000393978	CREB3,MAPK8,PRKD1,PRKD2
GO:0090075	Relaxation of muscle	5	24	0.78	0.42	0.0193	PIK3CA,PLN,PRKG1,SLC8A1,CAMK2D
GO:0090129	Positive regulation of synapse maturation	3	9	0.99	0.35	0.0445	ANAPC2,CDC20,CAMK2B
GO:0090136	Epithelial cell-cell adhesion	6	18	0.99	0.7	0.0012	VCL,KIT,ITGB5,CTNNA1,CTNNA2,CTNNA3
GO:0090140	Regulation of mitochondrial fission	7	30	0.83	0.63	0.0021	DCN,AURKA,KDR,PPARG,LRRK2,MAPT,RALBP1
GO:0090170	Regulation of Golgi inheritance	4	4	1.46	0.79	0.00092	MAPK1,MAP2K2,MAPK3,MAP2K1
GO:0090170	Regulation of Golgi inheritance	4	4	1.38	0.73	0.0014	9606.ENSP00000215832,9606.ENSP00000262948,9606.ENSP00000263025,9606.ENSP00000302486	MAPK1,MAP2K2,MAPK3,MAP2K1
GO:0090199	Regulation of release of cytochrome c from mitochondria	12	47	0.79	0.94	3.56e-05	9606.ENSP00000216115,9606.ENSP00000269305,9606.ENSP00000293288,9606.ENSP00000318822,9606.ENSP00000355865,9606.ENSP00000361405,9606.ENSP00000363591,9606.ENSP00000365230,9606.ENSP00000369647,9606.ENSP00000376943,9606.ENSP00000378040,9606.ENSP00000451828	BIK,TP53,BAX,BID,PRKN,MMP9,BAK1,BCL2L1,AVP,BCL2L11,BAD,AKT1
GO:0090200	Positive regulation of release of cytochrome c from mitochondria	8	27	0.86	0.75	0.00054	9606.ENSP00000216115,9606.ENSP00000269305,9606.ENSP00000293288,9606.ENSP00000318822,9606.ENSP00000361405,9606.ENSP00000363591,9606.ENSP00000376943,9606.ENSP00000378040	BIK,TP53,BAX,BID,MMP9,BAK1,BCL2L11,BAD
GO:0090201	Negative regulation of release of cytochrome c from mitochondria	5	21	0.76	0.41	0.0198	9606.ENSP00000355865,9606.ENSP00000363591,9606.ENSP00000365230,9606.ENSP00000369647,9606.ENSP00000451828	PRKN,BAK1,BCL2L1,AVP,AKT1
GO:0090217	Negative regulation of 1-phosphatidylinositol-4-phosphate 5-kinase activity	3	3	1.46	0.58	0.0064	PIP4K2C,PIP4K2A,PIP4K2B
GO:0090217	Negative regulation of 1-phosphatidylinositol-4-phosphate 5-kinase activity	3	3	1.38	0.54	0.0082	9606.ENSP00000347032,9606.ENSP00000365757,9606.ENSP00000482548	PIP4K2C,PIP4K2A,PIP4K2B
GO:0090218	Positive regulation of lipid kinase activity	21	39	1.11	2.48	1.95e-13	9606.ENSP00000221930,9606.ENSP00000241453,9606.ENSP00000257290,9606.ENSP00000261799,9606.ENSP00000282397,9606.ENSP00000284981,9606.ENSP00000288135,9606.ENSP00000304895,9606.ENSP00000308541,9606.ENSP00000313419,9606.ENSP00000341189,9606.ENSP00000342235,9606.ENSP00000359073,9606.ENSP00000360916,9606.ENSP00000362680,9606.ENSP00000363117,9606.ENSP00000380638,9606.ENSP00000390535,9606.ENSP00000428924,…	TGFB1,FLT3,PDGFRA,PDGFRB,FLT1,APP,KIT,IRS1,F2,CD19,PTK2,ERBB4,VAV3,VAV2,SRC,FGR,PTK2B,PRKD1,LYN,AMBRA1,CDC42
GO:0090257	Regulation of muscle system process	46	236	0.75	2.08	1.68e-17	KCNQ1,RPS6KB1,SLC9A1,CACNA1C,PPARG,KIT,CALM3,ITGA2,NOS3,PRKACA,ROCK2,SCN5A,SMAD3,HSP90AA1,FOXO3,TNNI3,DLG1,PLN,ATP2B4,CACNA1S,RYR2,AGT,PLCE1,ADA,PRKG1,MYLK2,FOXO1,SLC8A3,IL6ST,PPP3CA,CAMK2B,ROCK1,SLC8A1,PPARA,ACE2,CTNNA3,ATP2B1,PRKAG3,RHOA,PRKCA,PIK3CG,CAMK2D,NR4A1,NOS1,CALM1,CALM2
GO:0090303	Positive regulation of wound healing	18	60	0.86	1.46	2.40e-08	9606.ENSP00000223095,9606.ENSP00000226218,9606.ENSP00000260356,9606.ENSP00000280155,9606.ENSP00000306124,9606.ENSP00000308541,9606.ENSP00000311127,9606.ENSP00000321326,9606.ENSP00000341189,9606.ENSP00000353452,9606.ENSP00000354558,9606.ENSP00000364731,9606.ENSP00000379350,9606.ENSP00000384262,9606.ENSP00000386884,9606.ENSP00000393333,9606.ENSP00000407586,9606.ENSP00000458162	SERPINE1,VTN,THBS1,ADRA2A,PRKCE,F2,VEGFB,F2R,PTK2,MYLK,MTOR,F7,ITGB1,HPSE,CXCR4,TBXA2R,HRAS,ACTG1
GO:0090306	Meiotic spindle assembly	4	9	1.11	0.56	0.0064	AURKA,NDC80,CCNB2,ASPM
GO:0090313	Regulation of protein targeting to membrane	8	35	0.82	0.7	0.00090	ERBB2,FYN,AKT2,ITGB2,KCNE1,HRAS,MYO1C,ITGAM
GO:0090314	Positive regulation of protein targeting to membrane	7	29	0.85	0.65	0.0017	ERBB2,FYN,AKT2,ITGB2,HRAS,MYO1C,ITGAM
GO:0090314	Positive regulation of protein targeting to membrane	7	29	0.77	0.56	0.0037	9606.ENSP00000269571,9606.ENSP00000346671,9606.ENSP00000375892,9606.ENSP00000380948,9606.ENSP00000407586,9606.ENSP00000496954,9606.ENSP00000496959	ERBB2,FYN,AKT2,ITGB2,HRAS,MYO1C,ITGAM
GO:0090322	Regulation of superoxide metabolic process	10	31	0.97	1.1	1.18e-05	CYBA,GNAI2,PRKCD,MAPT,AGT,GNAI3,SYK,ITGB2,SHC1,ITGAM
GO:0090322	Regulation of superoxide metabolic process	11	31	0.93	1.12	7.26e-06	9606.ENSP00000221930,9606.ENSP00000261623,9606.ENSP00000284981,9606.ENSP00000312999,9606.ENSP00000331602,9606.ENSP00000355627,9606.ENSP00000358867,9606.ENSP00000364898,9606.ENSP00000380948,9606.ENSP00000401303,9606.ENSP00000496959	TGFB1,CYBA,APP,GNAI2,PRKCD,AGT,GNAI3,SYK,ITGB2,SHC1,ITGAM
GO:0090324	Negative regulation of oxidative phosphorylation	3	8	0.96	0.34	0.0453	9606.ENSP00000398698,9606.ENSP00000400175,9606.ENSP00000500990	TNF,RHOA,SNCA
GO:0090330	Regulation of platelet aggregation	8	31	0.88	0.77	0.00046	PRKCQ,PRKCD,PRKG1,SYK,IL6ST,JAK2,PRKCA,LYN
GO:0090330	Regulation of platelet aggregation	9	31	0.85	0.82	0.00023	9606.ENSP00000263125,9606.ENSP00000331602,9606.ENSP00000357470,9606.ENSP00000363092,9606.ENSP00000364898,9606.ENSP00000370698,9606.ENSP00000371067,9606.ENSP00000408695,9606.ENSP00000428924	PRKCQ,PRKCD,IL6R,PRKG1,SYK,IL6ST,JAK2,PRKCA,LYN
GO:0090398	Cellular senescence	18	60	0.94	1.69	1.87e-09	CDKN1B,MAPK14,CDK2,TP53,MAP2K1,PRKCD,MAPK11,MAP2K3,MAP3K5,MAPK8,MAP2K7,MAPK9,HRAS,MAP2K4,CDKN2A,MAPKAPK5,MAP2K6,IGF1R
GO:0090398	Cellular senescence	21	60	0.93	1.84	1.14e-10	9606.ENSP00000228872,9606.ENSP00000229795,9606.ENSP00000266970,9606.ENSP00000269305,9606.ENSP00000302486,9606.ENSP00000320866,9606.ENSP00000331602,9606.ENSP00000333685,9606.ENSP00000345083,9606.ENSP00000351908,9606.ENSP00000378974,9606.ENSP00000381070,9606.ENSP00000384849,9606.ENSP00000394560,9606.ENSP00000407586,9606.ENSP00000410402,9606.ENSP00000418915,9606.ENSP00000444198,9606.ENSP00000449381,…	CDKN1B,MAPK14,CDK2,TP53,MAP2K1,CALR,PRKCD,MAPK11,MAP2K3,MAP3K5,MAPK8,MAP2K7,CDKN1A,MAPK9,HRAS,MAP2K4,CDKN2A,CITED2,MAPKAPK5,MAP2K6,IGF1R
GO:0090399	Replicative senescence	5	16	0.88	0.51	0.0083	9606.ENSP00000223095,9606.ENSP00000269305,9606.ENSP00000384849,9606.ENSP00000418525,9606.ENSP00000418915	SERPINE1,TP53,CDKN1A,MME,CDKN2A
GO:0090400	Stress-induced premature senescence	3	8	1.04	0.37	0.0357	MAPK14,TP53,MAPKAPK5
GO:0090400	Stress-induced premature senescence	4	8	1.08	0.54	0.0070	9606.ENSP00000229795,9606.ENSP00000269305,9606.ENSP00000384849,9606.ENSP00000449381	MAPK14,TP53,CDKN1A,MAPKAPK5
GO:0090557	Establishment of endothelial intestinal barrier	4	11	1.03	0.5	0.0107	RAPGEF2,TJP1,AFDN,MYD88
GO:0090559	Regulation of membrane permeability	18	76	0.76	1.19	4.67e-07	9606.ENSP00000222330,9606.ENSP00000263980,9606.ENSP00000264110,9606.ENSP00000265164,9606.ENSP00000269305,9606.ENSP00000293288,9606.ENSP00000318822,9606.ENSP00000324806,9606.ENSP00000329213,9606.ENSP00000354558,9606.ENSP00000357804,9606.ENSP00000363591,9606.ENSP00000365230,9606.ENSP00000376943,9606.ENSP00000378040,9606.ENSP00000378974,9606.ENSP00000381185,9606.ENSP00000500386	GSK3A,SLC9A1,ATF2,CASP6,TP53,BAX,BID,GSK3B,SIVA1,MTOR,THEM4,BAK1,BCL2L1,BCL2L11,BAD,MAPK8,BCL2,CAMK2A
GO:0090650	Cellular response to oxygen-glucose deprivation	3	5	1.16	0.44	0.0192	9606.ENSP00000264033,9606.ENSP00000298552,9606.ENSP00000336790	CBL,TSC1,ATF4
GO:0097006	Regulation of plasma lipoprotein particle levels	13	54	0.77	0.95	2.50e-05	9606.ENSP00000233242,9606.ENSP00000252486,9606.ENSP00000261407,9606.ENSP00000264005,9606.ENSP00000274793,9606.ENSP00000309591,9606.ENSP00000355627,9606.ENSP00000359719,9606.ENSP00000366488,9606.ENSP00000398832,9606.ENSP00000445002,9606.ENSP00000465356,9606.ENSP00000466775	APOB,APOE,LPCAT3,LCAT,PLA2G7,PRKACA,AGT,PRKACB,PRKACG,AGTR1,APOA5,APOC1,APOC2
GO:0097018	Renal albumin absorption	2	2	1.38	0.35	0.0489	9606.ENSP00000315011,9606.ENSP00000366416	EDNRA,EDNRB
GO:0097048	Dendritic cell apoptotic process	2	2	1.38	0.35	0.0489	9606.ENSP00000365230,9606.ENSP00000381185	BCL2L1,BCL2
GO:0097049	Motor neuron apoptotic process	5	14	1.02	0.62	0.0032	ATF2,ERBB3,BAX,ROCK1,RHOA
GO:0097049	Motor neuron apoptotic process	7	14	1.08	0.94	0.00012	9606.ENSP00000264110,9606.ENSP00000267101,9606.ENSP00000293288,9606.ENSP00000381185,9606.ENSP00000382697,9606.ENSP00000400175,9606.ENSP00000482169	ATF2,ERBB3,BAX,BCL2,ROCK1,RHOA,NEFL
GO:0097061	Dendritic spine organization	7	33	0.79	0.58	0.0032	ITPKA,INSR,ITGA3,FYN,PTEN,IGF1R,CDC42
GO:0097062	Dendritic spine maintenance	5	11	1.12	0.7	0.0015	ITPKA,INSR,ITGA3,FYN,IGF1R
GO:0097062	Dendritic spine maintenance	5	11	1.04	0.64	0.0025	9606.ENSP00000260386,9606.ENSP00000303830,9606.ENSP00000315190,9606.ENSP00000346671,9606.ENSP00000497069	ITPKA,INSR,ITGA3,FYN,IGF1R
GO:0097191	Extrinsic apoptotic signaling pathway	30	113	0.81	1.86	1.63e-12	9606.ENSP00000162749,9606.ENSP00000221930,9606.ENSP00000222330,9606.ENSP00000226730,9606.ENSP00000250896,9606.ENSP00000259808,9606.ENSP00000261023,9606.ENSP00000266000,9606.ENSP00000267101,9606.ENSP00000293288,9606.ENSP00000303231,9606.ENSP00000318822,9606.ENSP00000324806,9606.ENSP00000329213,9606.ENSP00000332973,9606.ENSP00000339527,9606.ENSP00000341268,9606.ENSP00000344220,9606.ENSP00000357470,…	TNFRSF1A,TGFB1,GSK3A,IL2,MKNK2,RIPK1,ITGAV,DAXX,ERBB3,BAX,IL12A,BID,GSK3B,SIVA1,SMAD3,FOXO3,TRADD,PDPK1,IL6R,STK4,BAK1,BCL2L1,JAK2,BCL2L11,BAD,BCL2,DAPK1,TNF,RAF1,PIK3R1
GO:0097192	Extrinsic apoptotic signaling pathway in absence of ligand	9	36	0.86	0.83	0.00020	IL2,MKNK2,ITGAV,ERBB3,BAX,CTNNA1,FOXO3,BCL2L1,BAD
GO:0097192	Extrinsic apoptotic signaling pathway in absence of ligand	13	36	0.94	1.3	6.67e-07	9606.ENSP00000222330,9606.ENSP00000226730,9606.ENSP00000250896,9606.ENSP00000261023,9606.ENSP00000267101,9606.ENSP00000293288,9606.ENSP00000324806,9606.ENSP00000339527,9606.ENSP00000363591,9606.ENSP00000365230,9606.ENSP00000376943,9606.ENSP00000378040,9606.ENSP00000381185	GSK3A,IL2,MKNK2,ITGAV,ERBB3,BAX,GSK3B,FOXO3,BAK1,BCL2L1,BCL2L11,BAD,BCL2
GO:0097202	Activation of cysteine-type endopeptidase activity	7	20	0.93	0.75	0.00065	9606.ENSP00000220751,9606.ENSP00000265164,9606.ENSP00000330237,9606.ENSP00000332549,9606.ENSP00000363591,9606.ENSP00000368767,9606.ENSP00000378040	RIPK2,CASP6,CASP9,GRIN2A,BAK1,ASPH,BAD
GO:0097242	Amyloid-beta clearance	5	23	0.8	0.43	0.0167	INSR,ITGB2,MME,ITGAM,IGF1R
GO:0097242	Amyloid-beta clearance	8	23	0.93	0.84	0.00023	9606.ENSP00000243077,9606.ENSP00000245907,9606.ENSP00000303830,9606.ENSP00000380948,9606.ENSP00000418525,9606.ENSP00000496870,9606.ENSP00000496959,9606.ENSP00000497069	LRP1,C3,INSR,ITGB2,MME,LRP2,ITGAM,IGF1R
GO:0097284	Hepatocyte apoptotic process	5	13	1.05	0.64	0.0025	ATF2,RB1,BID,BCL2L1,PIK3CG
GO:0097284	Hepatocyte apoptotic process	6	13	1.05	0.77	0.00065	9606.ENSP00000264110,9606.ENSP00000265164,9606.ENSP00000318822,9606.ENSP00000361892,9606.ENSP00000365230,9606.ENSP00000419260	ATF2,CASP6,BID,STK4,BCL2L1,PIK3CG
GO:0097296	Activation of cysteine-type endopeptidase activity involved in apoptotic signaling pathway	3	3	1.46	0.58	0.0064	BAX,SMAD3,JAK2
GO:0097296	Activation of cysteine-type endopeptidase activity involved in apoptotic signaling pathway	3	3	1.38	0.54	0.0082	9606.ENSP00000293288,9606.ENSP00000332973,9606.ENSP00000371067	BAX,SMAD3,JAK2
GO:0097300	Programmed necrotic cell death	6	25	0.84	0.56	0.0047	TRAF2,RIPK1,TP53,BAX,MAP3K5,IRF3
GO:0097300	Programmed necrotic cell death	6	25	0.76	0.49	0.0086	9606.ENSP00000247668,9606.ENSP00000259808,9606.ENSP00000269305,9606.ENSP00000293288,9606.ENSP00000351908,9606.ENSP00000398698	TRAF2,RIPK1,TP53,BAX,MAP3K5,TNF
GO:0097306	Cellular response to alcohol	19	96	0.76	1.24	1.79e-07	AHR,KCNMB1,ADCY8,PPARG,ADCY1,CTNNA1,PRKCE,FOXO3,PRKAA1,PRKAA2,CYBB,ITPR2,ADCY3,CREB1,ATP2B1,BRCA1,AKT1,IGF1R,GNAI1
GO:0097398	Cellular response to interleukin-17	5	13	0.97	0.58	0.0043	9606.ENSP00000247668,9606.ENSP00000261464,9606.ENSP00000264657,9606.ENSP00000433623,9606.ENSP00000464030	TRAF2,TRAF5,STAT3,TRAF6,IKBKE
GO:0097400	interleukin-17-mediated signaling pathway	3	9	0.99	0.35	0.0445	TRAF2,TRAF5,TRAF6
GO:0097400	interleukin-17-mediated signaling pathway	4	9	1.03	0.51	0.0093	9606.ENSP00000247668,9606.ENSP00000261464,9606.ENSP00000433623,9606.ENSP00000464030	TRAF2,TRAF5,TRAF6,IKBKE
GO:0097553	Calcium ion transmembrane import into cytosol	17	89	0.75	1.11	1.47e-06	SLC8A2,TRPV5,CACNA1C,CACNA1D,BAX,ATP2B4,CACNA1S,RYR2,CACNA1E,ITPR3,CACNA1F,SLC8A3,ITPR2,SLC8A1,DDIT3,TRPV1,PLCG2
GO:0097553	Calcium ion transmembrane import into cytosol	25	89	0.83	1.74	6.35e-11	9606.ENSP00000236877,9606.ENSP00000265310,9606.ENSP00000266376,9606.ENSP00000288139,9606.ENSP00000293288,9606.ENSP00000306253,9606.ENSP00000321326,9606.ENSP00000332549,9606.ENSP00000350310,9606.ENSP00000352608,9606.ENSP00000355192,9606.ENSP00000355533,9606.ENSP00000356545,9606.ENSP00000360608,9606.ENSP00000363435,9606.ENSP00000363591,9606.ENSP00000369960,9606.ENSP00000370669,9606.ENSP00000370744,…	SLC8A2,TRPV5,CACNA1C,CACNA1D,BAX,ITPR1,F2R,GRIN2A,ATP2B4,RYR1,CACNA1S,RYR2,CACNA1E,GRIN1,ITPR3,BAK1,ADRA1A,SLC8A3,ITPR2,BCL2,SLC8A1,DDIT3,TRPV1,PLCG2,RYR3
GO:0097720	Calcineurin-mediated signaling	6	20	0.94	0.65	0.0019	NFATC3,MTOR,NR5A1,PPP3CA,NFATC2,NFATC1
GO:0097720	Calcineurin-mediated signaling	9	20	1.04	1.1	1.56e-05	9606.ENSP00000300659,9606.ENSP00000354558,9606.ENSP00000362690,9606.ENSP00000378306,9606.ENSP00000378323,9606.ENSP00000379330,9606.ENSP00000380878,9606.ENSP00000389377,9606.ENSP00000498330	NFATC3,MTOR,NR5A1,PPP3CB,PPP3CA,NFATC2,PPP3CC,NFATC1,PPP3R2
GO:0097746	Blood vessel diameter maintenance	33	140	0.76	1.76	1.61e-12	9606.ENSP00000222271,9606.ENSP00000252486,9606.ENSP00000258111,9606.ENSP00000274629,9606.ENSP00000280155,9606.ENSP00000282588,9606.ENSP00000297494,9606.ENSP00000299178,9606.ENSP00000306662,9606.ENSP00000315011,9606.ENSP00000317985,9606.ENSP00000321326,9606.ENSP00000355627,9606.ENSP00000356094,9606.ENSP00000360973,9606.ENSP00000363092,9606.ENSP00000366416,9606.ENSP00000368766,9606.ENSP00000369647,…	COMP,APOE,KCNMB4,KCNMB1,ADRA2A,ITGA1,NOS3,AVPR1A,ADRA1B,EDNRA,ROCK2,F2R,AGT,AVPR1B,AGTR2,PRKG1,EDNRB,ADRA1D,AVP,ADRA1A,ROCK1,SLC8A1,ADRA2C,ACE2,TBXA2R,TNF,AGTR1,RHOA,KCNMB2,BDKRB2,NOS1,ADRA2B,AVPR2
GO:0098543	Detection of other organism	5	20	0.78	0.43	0.0172	9606.ENSP00000260010,9606.ENSP00000354932,9606.ENSP00000363089,9606.ENSP00000379873,9606.ENSP00000389600	TLR2,TLR1,TLR4,HLA-A,TLR6
GO:0098581	Detection of external biotic stimulus	7	25	0.83	0.63	0.0019	9606.ENSP00000260010,9606.ENSP00000284818,9606.ENSP00000354932,9606.ENSP00000363089,9606.ENSP00000379873,9606.ENSP00000389600,9606.ENSP00000415941	TLR2,LY96,TLR1,TLR4,HLA-A,TLR6,C4B
GO:0098659	Inorganic cation import across plasma membrane	19	98	0.75	1.22	2.36e-07	KCNQ1,SLC8A2,SLC12A2,SLC9A1,TRPV5,CACNA1C,CACNA1D,FXYD2,KCNJ3,ATP2B4,CACNA1S,CACNA1E,KCNJ9,CACNA1F,SLC8A3,SLC8A1,KCNJ5,TRPV1,KCNJ6
GO:0098696	Regulation of neurotransmitter receptor localization to postsynaptic specialization membrane	3	9	0.99	0.35	0.0445	RAP1A,PRKCZ,HRAS
GO:0098703	Calcium ion import across plasma membrane	11	25	1.11	1.46	3.15e-07	SLC8A2,TRPV5,CACNA1C,CACNA1D,ATP2B4,CACNA1S,CACNA1E,CACNA1F,SLC8A3,SLC8A1,TRPV1
GO:0098703	Calcium ion import across plasma membrane	10	25	0.99	1.12	9.72e-06	9606.ENSP00000236877,9606.ENSP00000265310,9606.ENSP00000266376,9606.ENSP00000288139,9606.ENSP00000350310,9606.ENSP00000355192,9606.ENSP00000356545,9606.ENSP00000370669,9606.ENSP00000384763,9606.ENSP00000459962	SLC8A2,TRPV5,CACNA1C,CACNA1D,ATP2B4,CACNA1S,CACNA1E,SLC8A3,SLC8A1,TRPV1
GO:0098735	Positive regulation of the force of heart contraction	4	5	1.37	0.73	0.0015	SLC9A1,RYR2,SLC8A1,NOS1
GO:0098735	Positive regulation of the force of heart contraction	4	5	1.29	0.67	0.0023	9606.ENSP00000263980,9606.ENSP00000355533,9606.ENSP00000384763,9606.ENSP00000477999	SLC9A1,RYR2,SLC8A1,NOS1
GO:0098751	Bone cell development	7	32	0.8	0.59	0.0028	EP300,KIT,MED1,SRC,PIP4K2A,PTPN6,PTPN11
GO:0098761	Cellular response to interleukin-7	5	14	0.94	0.55	0.0054	9606.ENSP00000346300,9606.ENSP00000351646,9606.ENSP00000363318,9606.ENSP00000371194,9606.ENSP00000483570	CRKL,STIP1,IL2RG,LSP1,BTK
GO:0098801	Regulation of renal system process	10	33	0.87	0.92	6.42e-05	9606.ENSP00000261623,9606.ENSP00000262613,9606.ENSP00000299178,9606.ENSP00000312999,9606.ENSP00000321326,9606.ENSP00000355627,9606.ENSP00000366416,9606.ENSP00000369647,9606.ENSP00000398832,9606.ENSP00000496396	CYBA,SLC9A3R1,AVPR1A,GNAI2,F2R,AGT,EDNRB,AVP,AGTR1,AVPR2
GO:0098883	Synapse pruning	5	11	1.04	0.64	0.0025	9606.ENSP00000245907,9606.ENSP00000313967,9606.ENSP00000363770,9606.ENSP00000363773,9606.ENSP00000496959	C3,C1QB,C1QC,C1QA,ITGAM
GO:0098901	Regulation of cardiac muscle cell action potential	7	30	0.83	0.63	0.0021	CACNA1C,CALM3,DLG1,RYR2,CTNNA3,CAMK2D,CALM1
GO:0098911	Regulation of ventricular cardiac muscle cell action potential	4	12	0.99	0.47	0.0134	CACNA1C,DLG1,RYR2,CTNNA3
GO:0098914	Membrane repolarization during atrial cardiac muscle cell action potential	4	5	1.37	0.73	0.0015	KCNQ1,KCNN2,KCNJ3,KCNJ5
GO:0098914	Membrane repolarization during atrial cardiac muscle cell action potential	4	5	1.29	0.67	0.0023	9606.ENSP00000155840,9606.ENSP00000264773,9606.ENSP00000295101,9606.ENSP00000433295	KCNQ1,KCNN2,KCNJ3,KCNJ5
GO:0098915	Membrane repolarization during ventricular cardiac muscle cell action potential	5	13	1.05	0.64	0.0025	KCNQ1,KCNJ3,KCNE1,KCNJ5,KCNE1B
GO:0098915	Membrane repolarization during ventricular cardiac muscle cell action potential	5	13	0.97	0.58	0.0043	9606.ENSP00000155840,9606.ENSP00000295101,9606.ENSP00000382226,9606.ENSP00000433295,9606.ENSP00000477875	KCNQ1,KCNJ3,KCNE1,KCNJ5,KCNE1B
GO:0098971	Anterograde dendritic transport of neurotransmitter receptor complex	3	5	1.16	0.44	0.0192	9606.ENSP00000307078,9606.ENSP00000393379,9606.ENSP00000408979	KIF5B,KIF5C,KIF5A
GO:0099188	Postsynaptic cytoskeleton organization	4	11	0.94	0.45	0.0154	9606.ENSP00000311997,9606.ENSP00000458162,9606.ENSP00000482169,9606.ENSP00000494750	NEFH,ACTG1,NEFL,ACTB
GO:0099566	Regulation of postsynaptic cytosolic calcium ion concentration	4	10	0.99	0.48	0.0122	9606.ENSP00000236877,9606.ENSP00000282753,9606.ENSP00000306253,9606.ENSP00000384763	SLC8A2,GRM1,ITPR1,SLC8A1
GO:0099623	Regulation of cardiac muscle cell membrane repolarization	7	26	0.89	0.7	0.0010	KCNQ1,CACNA1D,SCN4B,SCN5A,KCNE1,SCN1B,KCNE1B
GO:0099623	Regulation of cardiac muscle cell membrane repolarization	7	26	0.81	0.61	0.0023	9606.ENSP00000155840,9606.ENSP00000288139,9606.ENSP00000322460,9606.ENSP00000328968,9606.ENSP00000382226,9606.ENSP00000396915,9606.ENSP00000477875	KCNQ1,CACNA1D,SCN4B,SCN5A,KCNE1,SCN1B,KCNE1B
GO:0099641	Anterograde axonal protein transport	4	8	1.08	0.54	0.0070	9606.ENSP00000307078,9606.ENSP00000393379,9606.ENSP00000408979,9606.ENSP00000481780	KIF5B,KIF5C,KIF5A,MAPK8IP3
GO:0106056	Regulation of calcineurin-mediated signaling	13	43	0.86	1.14	3.31e-06	9606.ENSP00000236877,9606.ENSP00000263980,9606.ENSP00000267101,9606.ENSP00000324806,9606.ENSP00000350310,9606.ENSP00000354558,9606.ENSP00000378207,9606.ENSP00000378306,9606.ENSP00000378323,9606.ENSP00000380878,9606.ENSP00000398698,9606.ENSP00000482457,9606.ENSP00000498330	SLC8A2,SLC9A1,ERBB3,GSK3B,ATP2B4,MTOR,AKAP5,PPP3CB,PPP3CA,PPP3CC,TNF,PLCG2,PPP3R2
GO:0106070	Regulation of adenylate cyclase-activating G protein-coupled receptor signaling pathway	4	13	0.87	0.4	0.0237	9606.ENSP00000222330,9606.ENSP00000312999,9606.ENSP00000350310,9606.ENSP00000408695	GSK3A,GNAI2,ATP2B4,PRKCA
GO:0110032	Positive regulation of G2/MI transition of meiotic cell cycle	3	3	1.46	0.58	0.0064	CDC25B,CDC25A,CDC25C
GO:0110061	Regulation of angiotensin-activated signaling pathway	2	2	1.46	0.36	0.0445	ROCK2,ROCK1
GO:0110061	Regulation of angiotensin-activated signaling pathway	2	2	1.38	0.35	0.0489	9606.ENSP00000317985,9606.ENSP00000382697	ROCK2,ROCK1
GO:0120041	Positive regulation of macrophage proliferation	3	5	1.24	0.47	0.0148	MAPK1,MAPK3,PTK2
GO:0120041	Positive regulation of macrophage proliferation	3	5	1.16	0.44	0.0192	9606.ENSP00000215832,9606.ENSP00000263025,9606.ENSP00000341189	MAPK1,MAPK3,PTK2
GO:0120183	Positive regulation of focal adhesion disassembly	3	6	1.16	0.44	0.0206	DUSP3,PIK3R1,IQSEC1
GO:0120183	Positive regulation of focal adhesion disassembly	3	6	1.08	0.4	0.0263	9606.ENSP00000226004,9606.ENSP00000428056,9606.ENSP00000480301	DUSP3,PIK3R1,IQSEC1
GO:0140039	Cell-cell adhesion in response to extracellular stimulus	2	2	1.38	0.35	0.0489	9606.ENSP00000294728,9606.ENSP00000380227	VCAM1,ITGA4
GO:0140052	Cellular response to oxidised low-density lipoprotein particle stimulus	5	11	1.12	0.7	0.0015	TICAM1,TLR4,TLR6,AKT1,MYD88
GO:0140052	Cellular response to oxidised low-density lipoprotein particle stimulus	5	11	1.04	0.64	0.0025	9606.ENSP00000248244,9606.ENSP00000363089,9606.ENSP00000389600,9606.ENSP00000451828,9606.ENSP00000498321	TICAM1,TLR4,TLR6,AKT1,MYD88
GO:0140467	Integrated stress response signaling	7	31	0.82	0.61	0.0024	JUNB,FOS,FOSL1,ATF4,CREB3,JUN,DDIT3
GO:0140467	Integrated stress response signaling	8	31	0.8	0.67	0.0011	9606.ENSP00000199389,9606.ENSP00000303315,9606.ENSP00000306245,9606.ENSP00000310170,9606.ENSP00000336790,9606.ENSP00000342136,9606.ENSP00000360266,9606.ENSP00000448665	EIF2AK1,JUNB,FOS,FOSL1,ATF4,CREB3,JUN,DDIT3
GO:0150003	Regulation of spontaneous synaptic transmission	3	6	1.16	0.44	0.0206	SLC12A2,AGER,ITGB1
GO:0150003	Regulation of spontaneous synaptic transmission	4	6	1.21	0.62	0.0035	9606.ENSP00000262461,9606.ENSP00000284981,9606.ENSP00000355865,9606.ENSP00000379350	SLC12A2,APP,PRKN,ITGB1
GO:0150062	Complement-mediated synapse pruning	3	4	1.26	0.49	0.0129	9606.ENSP00000245907,9606.ENSP00000363773,9606.ENSP00000496959	C3,C1QA,ITGAM
GO:0150064	Vertebrate eye-specific patterning	3	3	1.38	0.54	0.0082	9606.ENSP00000245907,9606.ENSP00000363773,9606.ENSP00000496959	C3,C1QA,ITGAM
GO:0150065	Regulation of deacetylase activity	4	11	1.03	0.5	0.0107	LRRK2,CREB3,MAPK8,CAMK2D
GO:0150065	Regulation of deacetylase activity	5	11	1.04	0.64	0.0025	9606.ENSP00000342136,9606.ENSP00000378974,9606.ENSP00000390535,9606.ENSP00000393978,9606.ENSP00000425824	CREB3,MAPK8,PRKD1,PRKD2,CAMK2D
GO:0150076	Neuroinflammatory response	14	41	1.0	1.52	5.38e-08	TLR2,ADCY8,ADCY1,MAPT,TLR9,IFNGR1,JUN,AGER,JAK2,ITGB1,ITGB2,TLR6,TRPV1,ITGAM
GO:0150076	Neuroinflammatory response	18	41	1.03	1.93	1.87e-10	9606.ENSP00000243077,9606.ENSP00000260010,9606.ENSP00000284981,9606.ENSP00000286355,9606.ENSP00000297323,9606.ENSP00000326366,9606.ENSP00000353874,9606.ENSP00000356713,9606.ENSP00000360266,9606.ENSP00000363773,9606.ENSP00000371067,9606.ENSP00000379350,9606.ENSP00000380948,9606.ENSP00000389600,9606.ENSP00000398698,9606.ENSP00000459962,9606.ENSP00000496959,9606.ENSP00000500990	LRP1,TLR2,APP,ADCY8,ADCY1,PSEN1,TLR9,IFNGR1,JUN,C1QA,JAK2,ITGB1,ITGB2,TLR6,TNF,TRPV1,ITGAM,SNCA
GO:0150099	Neuron-glial cell signaling	3	5	1.16	0.44	0.0192	9606.ENSP00000306662,9606.ENSP00000368766,9606.ENSP00000369960	ADRA1B,ADRA1D,ADRA1A
GO:0150105	Protein localization to cell-cell junction	5	19	0.88	0.5	0.0090	TJP1,MAPK9,ACTG1,ACTB,JAK1
GO:0150116	Regulation of cell-substrate junction organization	17	68	0.86	1.4	5.76e-08	VCL,DUSP3,KDR,SLC9A1,TLN1,ROCK2,SMAD3,PTK2,LAMTOR2,SLK,PTEN,SRC,ROCK1,RHOA,PIK3R1,ACTG1,IQSEC1
GO:0150116	Regulation of cell-substrate junction organization	17	68	0.78	1.2	5.64e-07	9606.ENSP00000226004,9606.ENSP00000260356,9606.ENSP00000263923,9606.ENSP00000263980,9606.ENSP00000298552,9606.ENSP00000316029,9606.ENSP00000317985,9606.ENSP00000332973,9606.ENSP00000341189,9606.ENSP00000361021,9606.ENSP00000361818,9606.ENSP00000362680,9606.ENSP00000382697,9606.ENSP00000400175,9606.ENSP00000428056,9606.ENSP00000458162,9606.ENSP00000480301	DUSP3,THBS1,KDR,SLC9A1,TSC1,TLN1,ROCK2,SMAD3,PTK2,PTEN,SDC4,SRC,ROCK1,RHOA,PIK3R1,ACTG1,IQSEC1
GO:0150117	Positive regulation of cell-substrate junction organization	6	30	0.77	0.48	0.0097	DUSP3,KDR,SMAD3,ROCK1,PIK3R1,IQSEC1
GO:0150117	Positive regulation of cell-substrate junction organization	8	30	0.81	0.69	0.00095	9606.ENSP00000226004,9606.ENSP00000263923,9606.ENSP00000298552,9606.ENSP00000332973,9606.ENSP00000361818,9606.ENSP00000382697,9606.ENSP00000428056,9606.ENSP00000480301	DUSP3,KDR,TSC1,SMAD3,SDC4,ROCK1,PIK3R1,IQSEC1
GO:1900015	Regulation of cytokine production involved in inflammatory response	13	56	0.75	0.92	3.44e-05	9606.ENSP00000229795,9606.ENSP00000248244,9606.ENSP00000264657,9606.ENSP00000302924,9606.ENSP00000308541,9606.ENSP00000327251,9606.ENSP00000360797,9606.ENSP00000363089,9606.ENSP00000385523,9606.ENSP00000389600,9606.ENSP00000398698,9606.ENSP00000437955,9606.ENSP00000498321	MAPK14,TICAM1,STAT3,IL17D,F2,NOS2,CARD9,TLR4,PPARA,TLR6,TNF,HIF1A,MYD88
GO:1900017	Positive regulation of cytokine production involved in inflammatory response	5	24	0.78	0.42	0.0193	TICAM1,CARD9,TLR4,TLR6,MYD88
GO:1900017	Positive regulation of cytokine production involved in inflammatory response	9	24	0.96	0.98	4.72e-05	9606.ENSP00000248244,9606.ENSP00000264657,9606.ENSP00000302924,9606.ENSP00000360797,9606.ENSP00000363089,9606.ENSP00000389600,9606.ENSP00000398698,9606.ENSP00000437955,9606.ENSP00000498321	TICAM1,STAT3,IL17D,CARD9,TLR4,TLR6,TNF,HIF1A,MYD88
GO:1900034	Regulation of cellular response to heat	5	17	0.93	0.54	0.0063	CREBBP,EP300,MAPT,MTOR,MAPKAPK2
GO:1900034	Regulation of cellular response to heat	5	17	0.85	0.48	0.0101	9606.ENSP00000262367,9606.ENSP00000263253,9606.ENSP00000324806,9606.ENSP00000354558,9606.ENSP00000356070	CREBBP,EP300,GSK3B,MTOR,MAPKAPK2
GO:1900046	Regulation of hemostasis	19	72	0.81	1.36	4.88e-08	9606.ENSP00000222271,9606.ENSP00000223095,9606.ENSP00000226218,9606.ENSP00000233156,9606.ENSP00000234071,9606.ENSP00000252486,9606.ENSP00000257290,9606.ENSP00000260356,9606.ENSP00000278407,9606.ENSP00000297494,9606.ENSP00000308541,9606.ENSP00000321326,9606.ENSP00000331602,9606.ENSP00000356671,9606.ENSP00000363092,9606.ENSP00000364731,9606.ENSP00000384262,9606.ENSP00000384957,9606.ENSP00000393333	COMP,SERPINE1,VTN,TFPI,PROC,APOE,PDGFRA,THBS1,SERPING1,NOS3,F2,F2R,PRKCD,SERPINC1,PRKG1,F7,HPSE,F11,TBXA2R
GO:1900047	Negative regulation of hemostasis	13	47	0.83	1.06	7.35e-06	9606.ENSP00000222271,9606.ENSP00000223095,9606.ENSP00000226218,9606.ENSP00000233156,9606.ENSP00000234071,9606.ENSP00000252486,9606.ENSP00000257290,9606.ENSP00000278407,9606.ENSP00000297494,9606.ENSP00000308541,9606.ENSP00000331602,9606.ENSP00000363092,9606.ENSP00000384957	COMP,SERPINE1,VTN,TFPI,PROC,APOE,PDGFRA,SERPING1,NOS3,F2,PRKCD,PRKG1,F11
GO:1900076	Regulation of cellular response to insulin stimulus	19	65	0.93	1.72	8.54e-10	RPS6KB1,PRKCQ,PPARG,IRS1,GNAI2,PRKCD,PRKAA1,PIP4K2C,AGT,SRC,PIP4K2A,PRKCZ,NCOA1,ATP2B1,NCOA2,PIP4K2B,PTPN11,PRKCB,MYO1C
[truncated: 314 more rows]

## Sheet: KEGG Path
#term ID	term description	observed gene count	background gene count	strength	signal	false discovery rate	matching proteins in your network (labels)
[truncated: 341 more rows]

## Sheet: Reactome
#term ID	term description	observed gene count	background gene count	strength	signal	false discovery rate	matching proteins in your network (labels)
[truncated: 1,219 more rows]
